# Supplementary material for: Informative Regions In Viral Genomes
Source: MDPI journal article supplement (doi:10.3390/v13061164), 2021-06-18
Supplement: s1 [file s1]

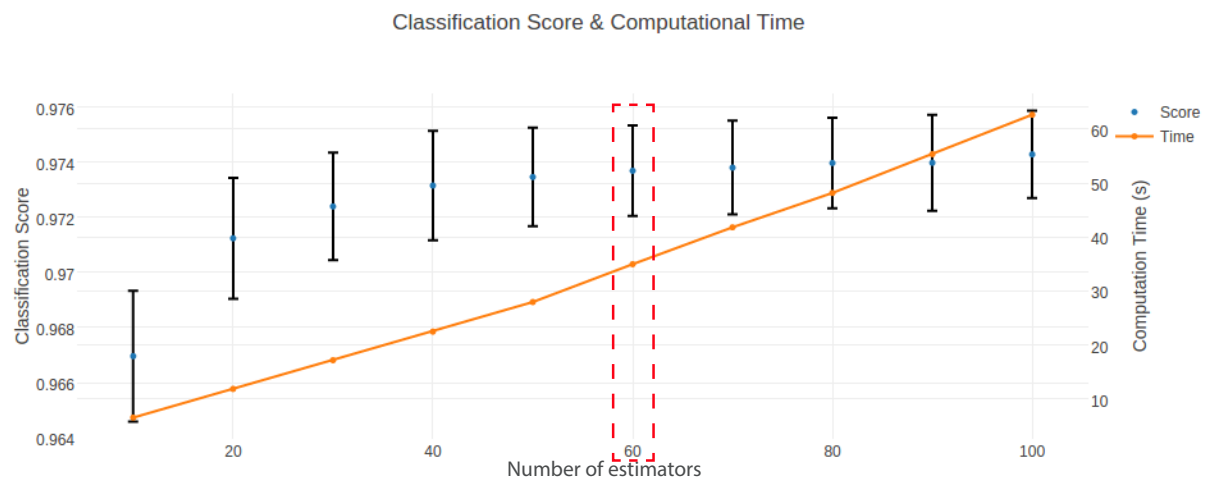

**Figure S1. Model exploration.** Scatter plot showing how the number of estimators/trees of the random forest (x-axis) affects the classification score (blue dots, left-y-axis) and computational time (orange dots, right y-axis). Whiskers represent standard deviation. The red dashed rectangle highlights the number of estimators used for the final model.

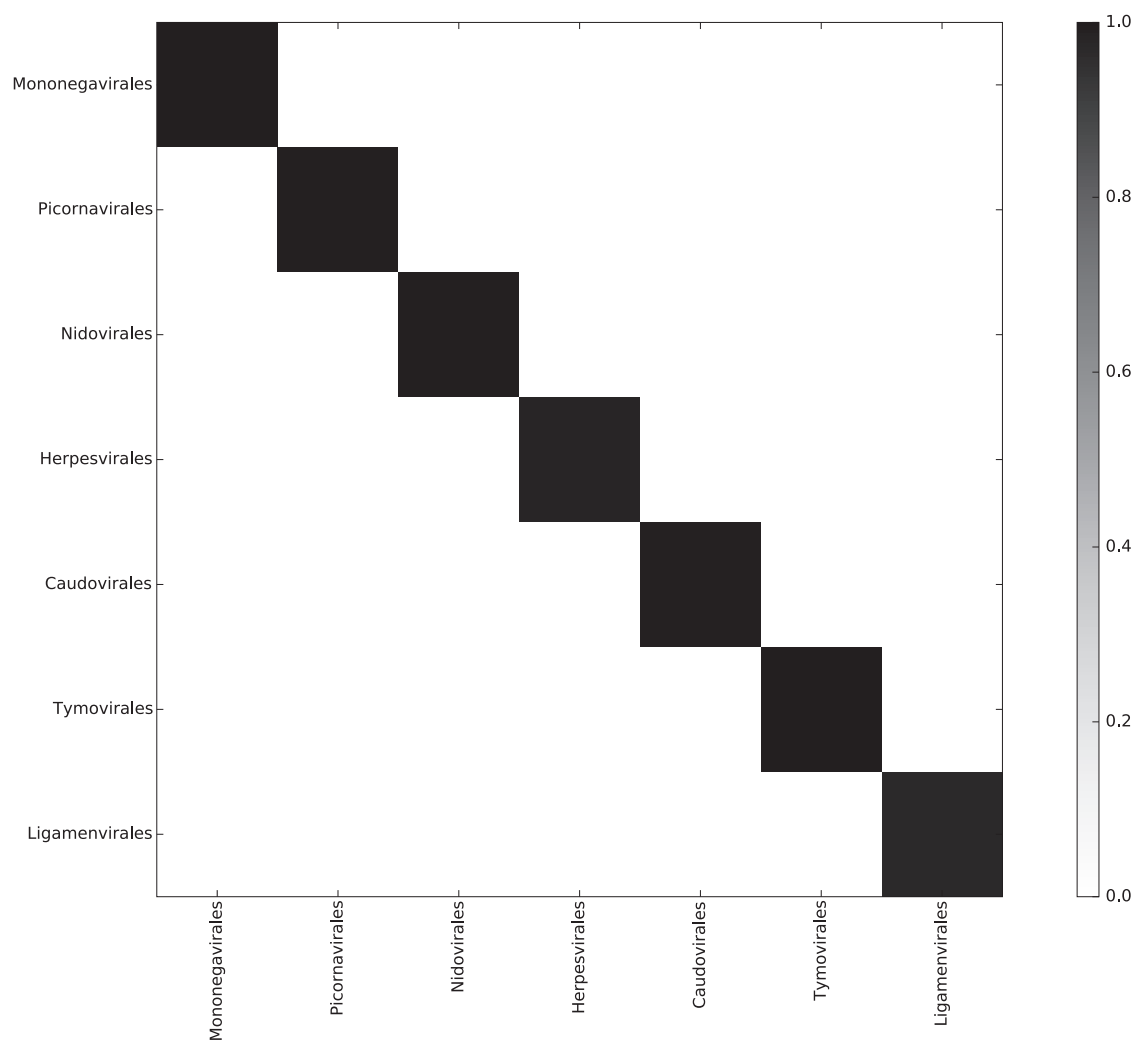

**Figure S2 Random Forest accurately classifies genomes into their respective Orders.**

Heatmap representing the confusion matrix obtained after classifying viral genomes at the Order level. The color code indicates the proportion of genomes of the Order in the x-axis classified as a genome of the Order in the y-axis.

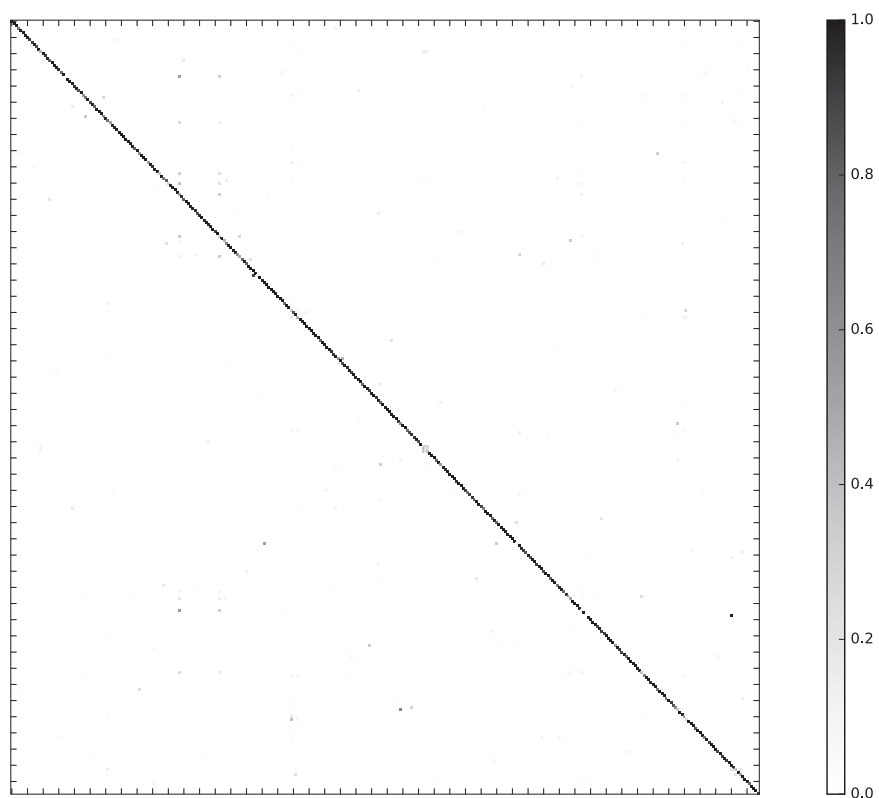

**Figure S3. Random Forest accurately classifies genomes into their respective Genera.**

Heatmap representing the confusion matrix obtained after classifying viral genomes at the Genus level. The color code indicates the proportion of genomes of the genus in the x-axis classified as a genome of the genus in the y-axis. Genome names were removed for ease of interpretation.

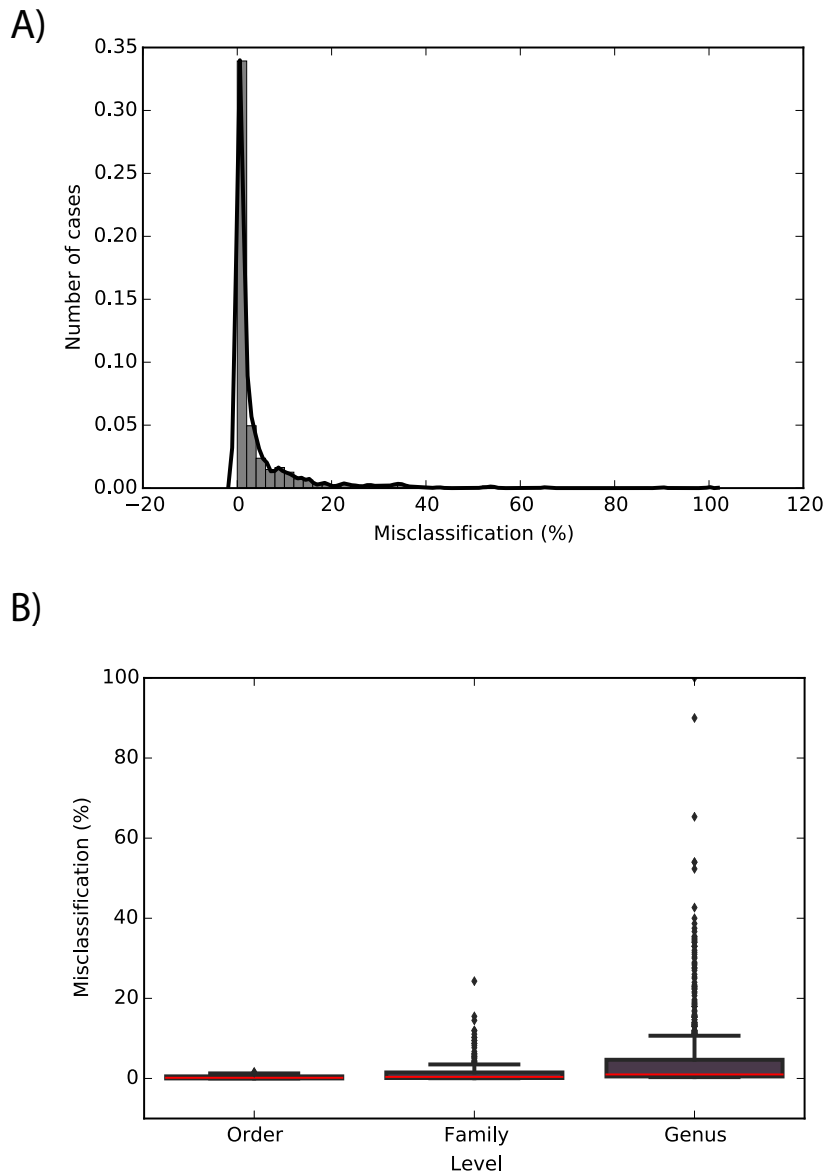

**Figure S4. High misclassification is rare.** (A) Distribution of the misclassification cases combined for all taxonomic levels. (B) Box plots representing the distribution of the misclassification cases per taxonomic level. Whiskers indicate 1.5 x IQR (Interquartile range), median is indicated in red.

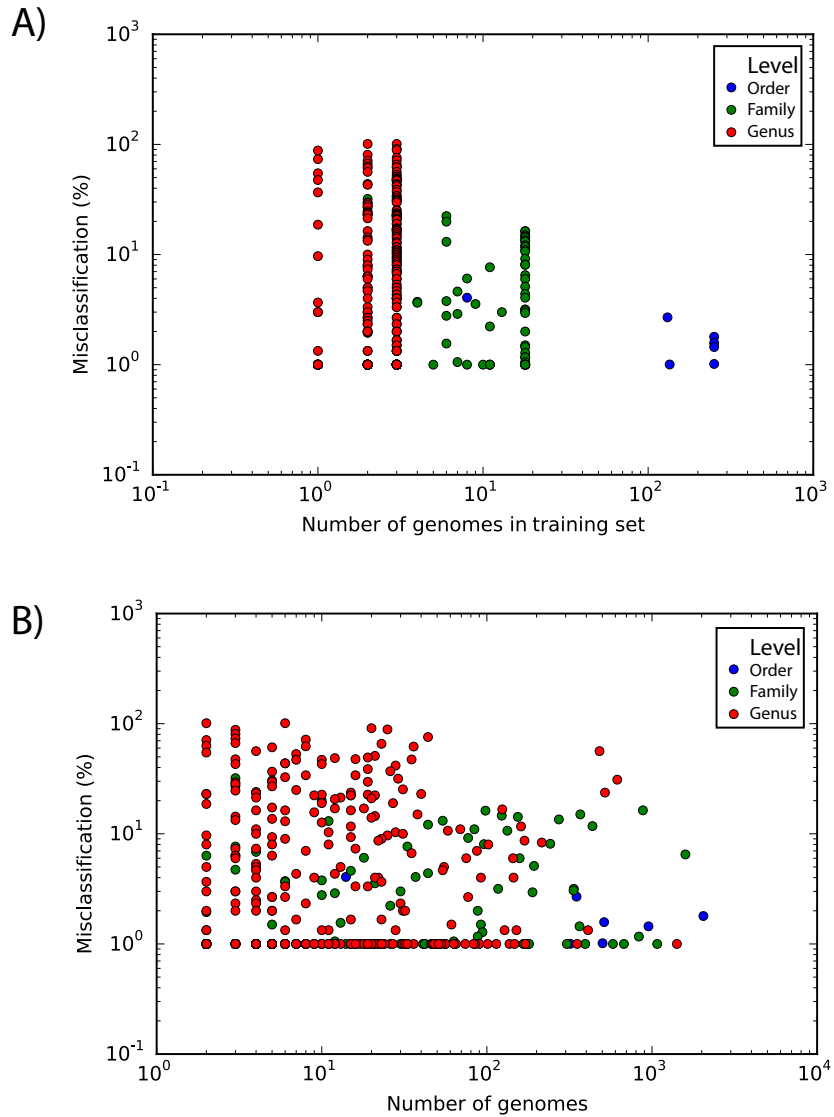

**Figure S5. Misclassification in terms of the number of genomes available.** Scatter plot showing (A) the number of genomes in a training iteration or (B) total number of genomes available for each taxonomic level versus the misclassification percentage. Each dot represents a taxonomical entry and the color represents the correspondent taxonomic level.

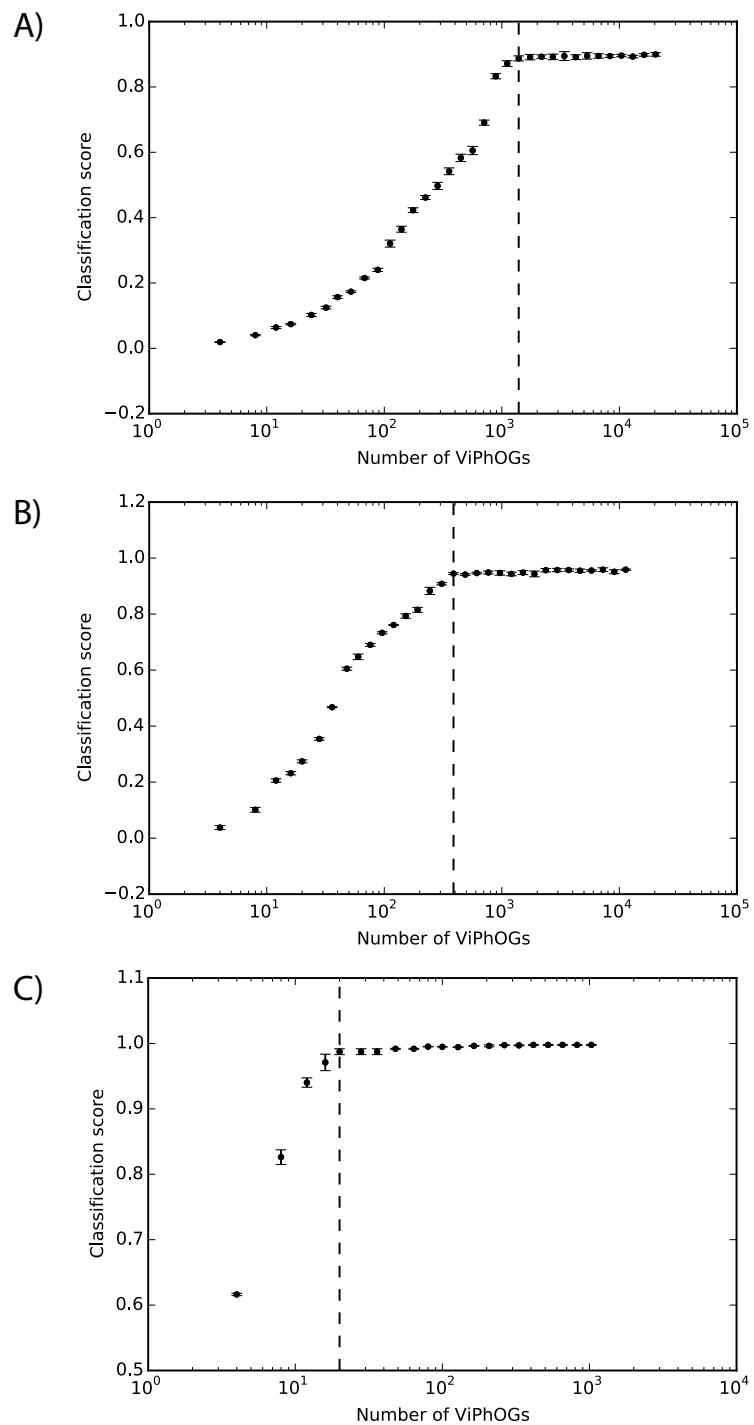

**Figure S6. Selection of the informative ViPhOGs.** Scatter plots showing number of importance ranked ViPhOGs versus the classification score for each taxonomic level: (A) Genus, (B) Family, (C) Order. Dashed lines indicate the number of ranked ViPhOGs chosen as informative ViPhOGs. That is, the minimum number of ranked ViPhOGs that get the highest classification score. Whiskers represent standard deviation.
