# Supplementary material for: Informative Regions In Viral Genomes
Source: Viruses. 2021 Jun 18;13(6):1164. doi: 10.3390/v13061164 (PMC8234400; doi:10.3390/v13061164)
Supplement: Supplementary file 1 [file viruses-13-01164-s001.zip]

Archive with 7 entries (4 files):
- Supplementary Data/
- Supplementary Data/AllTables.xlsx
- __MACOSX/
- __MACOSX/Supplementary Data/
- __MACOSX/Supplementary Data/._AllTables.xlsx
- Supplementary Data/SupplementaryFigures.pdf
- __MACOSX/Supplementary Data/._SupplementaryFigures.pdf
