# Supplementary material for: Informative Regions In Viral Genomes
Source: Viruses. 2021 Jun 18;13(6):1164. doi: 10.3390/v13061164 (PMC8234400; doi:10.3390/v13061164)
Supplement: Supplementary file 1 [file viruses-13-01164-s001.zip › Supplementary Data/AllTables.xlsx]

## Sheet: Table S1
Table S1. Genomes summary. List of all accessions retrieved from NCBI public databases.
C/L = circular genome (C) or linear genome (L)
Representative = Indicates if the accession was a representative of a cluster and thus, included as part of the non-redundant viral diversity (TRUE)
Representative Accession = Indicates the accession number of the representative of each cluster that was generated at the dereplication step at nucleotide level
Virus	Length (bp)	C/L	Accession	GI	Representative	Representative Accession	Host
GB virus C genomic RNA, complete genome, strain: F1029	9333	linear	AB008336	253683358	True	AB008336	Eukaryote
Human herpesvirus 6B DNA, complete genome, strain: HST	161573	linear	AB021506	4995977	True	AB021506	Eukaryote
Human immunodeficiency virus type 1 subtype C genomic RNA, complete genome	9680	linear	AB023804	6016887	True	AB023804	Eukaryote
TTV-like mini virus DNA, complete genome, isolate: TLMV-CBD231	2860	circular	AB026930	6463708	True	AB026930	Eukaryote
Human papillomavirus type 69 DNA, complete genome	7700	circular	AB027020	6970418	True	AB027020	Eukaryote
Hepatitis C virus (isolate JPUT971017) genomic RNA, complete genome	9654	linear	AB030907	9757541	True	AB030907	Eukaryote
Hepatitis C virus (isolate VAT96) genomic RNA, complete genome	9488	linear	AB031663	6521008	True	AB031663	Eukaryote
Hepatitis B virus (genotype F) genomic DNA, complete genome, isolate:VNZ8375-2	3129	circular	AB036918	11191939	True	AB036918	Eukaryote
Hepatitis B virus DNA, complete genome, isolate: HBV PG-Yohko	3182	circular	AB037928	12060190	True	AB037928	Eukaryote
Hepatitis D virus genomic RNA, complete genome, isolate:VnzD8624	1674	linear	AB037949	15718380	True	AB037949	Eukaryote
Soybean dwarf virus genomic RNA, complete genome, strain:YP	5841	linear	AB038148	15147835	True	AB038148	Eukaryote
JC polyomavirus DNA, complete genome, isolate: GH-1	5113	circular	AB038252	9796418	True	AB038252	Eukaryote
JC polyomavirus DNA, complete genome, isolate: Tky-1	5234	circular	AB038254	9796432	True	AB038254	Eukaryote
TT virus complete genome, isolate:TTVsan-IR1031	3795	circular	AB038619	7415881	True	AB038619	Eukaryote
TT virus complete genome, isolate:TTVsan-S039	3792	circular	AB038620	7415884	True	AB038620	Eukaryote
TTV-like mini virus complete genome, isolate:TLMV-CLC205	2841	circular	AB038628	7415914	True	AB038628	Eukaryote
Norwalk-like virus genomic RNA, complete genome, isolate:SzUG1	7700	linear	AB039774	22773784	True	AB039774	Eukaryote
Norwalk-like virus genomic RNA, complete genome, isolate:Saitama U25	7524	linear	AB039780	22773808	True	AB039780	Eukaryote
Norwalk-like virus genomic RNA, complete genome, isolate:Saitama U201	7541	linear	AB039782	22773816	True	AB039782	Eukaryote
Chiba virus genomic RNA, complete genome	7697	linear	AB042808	11275371	True	AB042808	Eukaryote
Citrus tristeza virus genomic RNA, complete genome, seedling yellows strain	19302	linear	AB046398	11414863	True	AB046398	Eukaryote
Hepatitis B virus DNA, complete genome, serotype:ayw	3194	circular	AB048705	13365550	True	AB048705	Eukaryote
Hepatitis C virus genomic RNA, complete genome, isolate: HCVT094	9616	linear	AB049088	11559442	True	AB049088	Eukaryote
Human immunodeficiency virus 1 proviral DNA, complete genome, clone:97GH-AG1	9748	linear	AB049811	13517082	True	AB049811	Eukaryote
Human immunodeficiency virus type 1 genomic RNA, complete genome, Ghana intersubtype A/G recombinant	9708	linear	AB052867	13560259	True	AB052867	Eukaryote
Torque teno virus DNA, complete genome, genotype 23	3792	circular	AB054648	14588527	True	AB054648	Eukaryote
Tobacco leaf curl Kochi virus-[KK] DNA, complete genome, isolate: TLCV-KK	2760	linear	AB055009	19570905	True	AB055009	Eukaryote
Hepatitis B virus DNA, complete genome, clone:USG18	3089	circular	AB056516	15425700	True	AB056516	Eukaryote
White clover mosaic virus genomic RNA, complete genome, strain: RC	5843	linear	AB056720	740529713	True	AB056720	Eukaryote
Feline leukemia virus DNA, complete genome, clone: 33	8602	linear	AB060732	351720596	True	AB060732	Eukaryote
Torque teno virus DNA, complete genome, isolate: CT25F	3726	linear	AB064596	17827189	True	AB064596	Eukaryote
Torque teno virus DNA, complete genome, isolate: CT30F	3570	linear	AB064597	17827196	True	AB064597	Eukaryote
Torque teno virus DNA, complete genome, isolate: JT03F	3669	linear	AB064599	17827210	True	AB064599	Eukaryote
Torque teno virus DNA, complete genome, isolate: JT05F	3688	linear	AB064600	17827217	True	AB064600	Eukaryote
Torque teno virus DNA, complete genome, isolate: JT14F	3626	linear	AB064601	17827223	True	AB064601	Eukaryote
Torque teno virus DNA, complete genome, isolate: JT19F	3676	linear	AB064602	17827230	True	AB064602	Eukaryote
Torque teno virus DNA, complete genome, isolate: JT41F	3727	linear	AB064603	17827237	True	AB064603	Eukaryote
Torque teno virus DNA, complete genome, isolate: CT39F	3759	linear	AB064604	17827243	True	AB064604	Eukaryote
Torque teno virus DNA, complete genome, isolate: JT33F	3701	linear	AB064606	17827257	True	AB064606	Eukaryote
Rice tungro spherical virus genomic RNA, complete genome, strain:Vt6	12171	linear	AB064963	14626085	True	AB064963	Eukaryote
Cucumber mosaic virus satellite RNA, complete genome, clone:(fl)RNA5	383	linear	AB072504	57864463	True	AB072504	Eukaryote
Swine hepatitis E virus genomic RNA, complete genome	7257	linear	AB073912	17826985	True	AB073912	Eukaryote
Hepatitis E virus genomic RNA, nearly complete genome, isolate: JAK-Sai	7236	linear	AB074915	22830576	True	AB074915	Eukaryote
Hepatitis E virus genomic RNA, nearly complete genome, isolate: JKK-Sap	7235	linear	AB074917	22830577	True	AB074917	Eukaryote
Soybean dwarf virus genomic RNA, complete genome, strain:DC, isolate:HS99-5	5708	linear	AB076038	27530830	True	AB076038	Eukaryote
JC virus DNA, complete genome, isolate:MT-14	5122	linear	AB077861	21727958	True	AB077861	Eukaryote
JC virus DNA, complete genome, isolate:MN-6	5118	linear	AB077866	21727993	True	AB077866	Eukaryote
Human immunodeficiency virus 1 DNA, complete genome, clone:ARES2	9637	linear	AB078005	19072103	True	AB078005	Eukaryote
Tobacco leaf curl Japan virus-[JP3] DNA, complete genome, isolate:TLCV-Jp3	2761	circular	AB079689	29134780	True	AB079689	Eukaryote
Honeysuckle yellow vein mosaic virus-[Yamaguchi] DNA, complete genome	2758	circular	AB079765	29134787	True	AB079765	Eukaryote
Eupatorium yellow vein virus - [Yamaguchi] DNA, complete genome	2765	circular	AB079766	29134795	True	AB079766	Eukaryote
Bean yellow mosaic virus genomic RNA, complete genome, strain:IbG	9547	linear	AB079887	109638257	True	AB079887	Eukaryote
Bean yellow mosaic virus genomic RNA, complete genome, strain:GB2	9530	linear	AB079888	388240710	True	AB079888	Eukaryote
Hepatitis C virus genomic RNA, complete genome, isolate:M1LE	9587	linear	AB080299	27544243	True	AB080299	Eukaryote
Hepatitis E virus genomic RNA, complete genome, isolate: HE-JI4	7186	linear	AB080575	21929126	True	AB080575	Eukaryote
JC virus DNA, complete genome, isolate:CN-25	5108	linear	AB081009	24636331	True	AB081009	Eukaryote
Norwalk-like virus genomic RNA, complete genome, strain:WUG1	7688	linear	AB081723	22773824	True	AB081723	Eukaryote
Norwalk-like virus genomic RNA, complete genome, strain: YURI	7560	linear	AB083780	118722062	True	AB083780	Eukaryote
Norwalk-like virus genomic RNA, complete genome, strain: GIFU'99	7562	linear	AB084071	118722070	True	AB084071	Eukaryote
Rabies virus genomic RNA, complete genome, strain:HEP-Flury	11615	linear	AB085828	27530021	True	AB085828	Eukaryote
Hepatitis E virus genomic RNA, complete genome, isolate: HE-JA10	7262	linear	AB089824	26665375	True	AB089824	Eukaryote
Theiler's-like virus of rats NGS910 genomic RNA, complete genome	8021	linear	AB090161	28804493	True	AB090161	Eukaryote
Hepatitis E virus genomic RNA, nearly complete genome, isolate: JJT-Kan	7218	linear	AB091394	28971644	True	AB091394	Eukaryote
Human immunodeficiency virus 1 proviral DNA, nearly complete genome, isolate:mIDU502	9046	linear	AB097865	31559615	True	AB097865	Eukaryote
Human immunodeficiency virus 1 proviral DNA, nearly complete genome, isolate:mCSW503	8998	linear	AB097866	31559623	True	AB097866	Eukaryote
Human immunodeficiency virus 1 proviral DNA, nearly complete genome, isolate:mCSW104	9022	linear	AB097867	31559631	True	AB097867	Eukaryote
Human immunodeficiency virus 1 proviral DNA, complete genome, isolate:mIDU107	9589	linear	AB097868	31559641	True	AB097868	Eukaryote
Human immunodeficiency virus 1 proviral DNA, complete genome, isolate:mIDU106	9600	linear	AB097869	31559651	True	AB097869	Eukaryote
Human immunodeficiency virus 1 proviral DNA, nearly complete genome, isolate:mSTD101	9098	linear	AB097870	31559661	True	AB097870	Eukaryote
Human immunodeficiency virus 1 proviral DNA, nearly complete genome, isolate:mIDU101	9073	linear	AB097871	31559671	True	AB097871	Eukaryote
Human immunodeficiency virus 1 proviral DNA, complete genome, isolate:mCSW105	9645	linear	AB097872	31559679	True	AB097872	Eukaryote
Human immunodeficiency virus 1 proviral DNA, nearly complete genome, isolate:mIDU103	9191	linear	AB097873	31559689	True	AB097873	Eukaryote
Human herpesvirus 3 DNA, complete genome, strain: Oka, sub_strain: vOka	125078	linear	AB097932	26665420	True	AB097932	Eukaryote
Human immunodeficiency virus 1 proviral DNA, complete genome, clone:pUG031-A2	9616	linear	AB098331	31980415	True	AB098331	Eukaryote
Human immunodeficiency virus 1 proviral DNA, complete genome, clone:pUG029-A4	9635	linear	AB098333	31980435	True	AB098333	Eukaryote
Human immunodeficiency virus 2 proviral DNA, nearly complete genome, isolate:01JP-IMCJ/KR020.1	9339	linear	AB100245	32879750	True	AB100245	Eukaryote
Ageratum yellow vein virus-[Tomato] DNA, complete genome	2735	circular	AB100305	27808424	True	AB100305	Eukaryote
JC virus DNA, complete genome, isolate: FA-1a	5056	circular	AB103402	34014436	True	AB103402	Eukaryote
JC virus DNA, complete genome, isolate: FC-4a	5174	circular	AB103411	34014497	True	AB103411	Eukaryote
Hepatitis E virus genomic RNA, nearly complete genome, isolate:CCC220	7193	linear	AB108537	31339153	True	AB108537	Eukaryote
Hepatitis B virus DNA, complete genome, clone: K5-0	2966	linear	AB111115	38603576	True	AB111115	Eukaryote
Hepatitis B virus DNA, complete genome, clone: K5-7	3071	linear	AB111116	38603578	True	AB111116	Eukaryote
Hepatitis B virus DNA, complete genome, clone: KM-0	3005	linear	AB111118	38603611	True	AB111118	Eukaryote
Avian leukosis virus genomic RNA, complete genome	7448	linear	AB112960	32188034	True	AB112960	Eukaryote
JC polyomavirus DNA, complete genome, isolate: Luz-20	5124	circular	AB113133	40313444	True	AB113133	Eukaryote
Tomato leaf curl virus satellite DNA, complete genome, isolate: Indonesia 02	1354	linear	AB113651	32440936	True	AB113651	Eukaryote
Hepatitis B virus DNA, complete genome, isolate:HBV-O47	3215	circular	AB115417	42558181	True	AB115417	Eukaryote
Tomato leaf curl virus satellite DNA, complete genome, isolate: Indonesia 03	1299	linear	AB116230	33438239	True	AB116230	Eukaryote
Hepatitis delta virus DNA, complete genome, strain:Miyako(JA-M23)	1678	circular	AB118837	38636631	True	AB118837	Eukaryote
Hepatitis delta virus DNA, complete genome, strain:Miyako(JA-M27)	1683	circular	AB118839	38636635	True	AB118839	Eukaryote
Hepatitis delta virus DNA, complete genome, strain:Miyako(JA-M29)	1675	circular	AB118840	38636637	True	AB118840	Eukaryote
Norwalk-like virus genomic RNA, complete genome, strain: SW/NV/swine43/JP	7537	linear	AB126320	118722074	True	AB126320	Eukaryote
Kyuri green mottle mosaic virus genomic RNA, complete genome, isolate:YM	6512	linear	AB162006	62122434	True	AB162006	Eukaryote
Tomato leaf curl Java virus-[Ageratum] DNA, complete genome	2747	circular	AB162141	42558210	True	AB162141	Eukaryote
Human parainfluenza virus 2 genomic RNA, complete genome	15654	linear	AB176531	67906100	True	AB176531	Eukaryote
Simian-Human immunodeficiency virus genomic RNA, complete genome	9940	linear	AB177846	54312017	True	AB177846	Eukaryote
Honeysuckle yellow vein mosaic virus DNA, complete genome, isolate:HY12	2763	circular	AB178946	47155451	True	AB178946	Eukaryote
Honeysuckle yellow vein mosaic virus DNA, complete genome, isolate:OT2	2762	circular	AB178948	47155465	True	AB178948	Eukaryote
Viral hemorrhagic septicemia virus genomic RNA, complete genome, strain:KRRV9822	11158	linear	AB179621	55771203	True	AB179621	Eukaryote
Honeysuckle yellow vein mosaic virus DNA, complete genome, isolate: SP1	2771	circular	AB182261	48958398	True	AB182261	Eukaryote
Bombyx mori Macula-like virus genomic RNA, complete genome	6532	linear	AB186123	51014247	True	AB186123	Eukaryote
Norovirus Hu/GI/Otofuke/1979/JP genomic RNA, complete genome	7746	linear	AB187514	74038598	True	AB187514	Eukaryote
Murine leukemia virus Graffi GV-1.2 DNA, complete genome	8319	linear	AB187565	53749058	True	AB187565	Eukaryote
Murine leukemia virus Graffi GV-1.4 DNA, complete genome	8260	linear	AB187566	378404894	True	AB187566	Eukaryote
Zucchini yellow mosaic virus genomic RNA, complete genome, isolate:2002	9593	linear	AB188116	84993541	True	AB188116	Eukaryote
Hepatitis E virus genomic RNA, nearly complete genome, isolate: JDEER-Hyo03L	7230	linear	AB189071	56377982	True	AB189071	Eukaryote
Hepatitis C virus genomic RNA, complete genome, strain:0	9587	linear	AB191333	62006146	True	AB191333	Eukaryote
Human enterovirus 90 genomic RNA, complete genome	7425	linear	AB192877	62433239	True	AB192877	Eukaryote
Hepatitis E virus genomic RNA, complete genome, isolate: JYI-ChiSai01C	7260	linear	AB197674	68226401	True	AB197674	Eukaryote
Human enterovirus C genomic RNA, complete genome, strain: Cambodia-02	7431	linear	AB205395	73912029	True	AB205395	Eukaryote
Human coxsackievirus A18 genomic RNA, complete genome, strain: CAM1972	7460	linear	AB205396	73912031	True	AB205396	Eukaryote
Hepatitis B virus DNA, complete genome, strain: Hiroshima	4396	circular	AB206816	478246958	True	AB206816	Eukaryote
Hepatitis B virus DNA, complete genome, strain: Toranomon	4412	circular	AB206817	478246963	True	AB206817	Eukaryote
Human papillomavirus type 27b DNA, complete genome	7831	circular	AB211993	71061109	True	AB211993	Eukaryote
Heterocapsa circularisquama RNA virus DNA, complete genome, isolate: HcRNAV109	4391	linear	AB218609	78210728	True	AB218609	Eukaryote
Hepatitis B virus DNA, complete genome, isolate:UK2	3050	circular	AB219530	78675482	True	AB219530	Eukaryote
Hepatitis B virus DNA, complete genome, isolate:UK4	3038	circular	AB219532	78675487	True	AB219532	Eukaryote
Hepatitis B virus DNA, complete genome, isolate:UK5	3218	circular	AB219533	78675489	True	AB219533	Eukaryote
Onion yellow dwarf virus genomic RNA, complete genome, isolate: G79	10183	linear	AB219833	109689219	True	AB219833	Eukaryote
Onion yellow dwarf virus genomic RNA, complete genome, isolate: G5h	10459	linear	AB219834	109689221	True	AB219834	Eukaryote
Human immunodeficiency virus 1 proviral DNA, complete genome, isolate:93TH062	9634	linear	AB220947	108860356	True	AB220947	Eukaryote
Hepatitis E virus genomic RNA, complete genome, genotype 4, isolate: HE-JA2	7268	linear	AB220974	87886963	True	AB220974	Eukaryote
Human immunodeficiency virus 1 proviral DNA, complete genome, p04JPDR6075B-50	9664	linear	AB221126	108860384	True	AB221126	Eukaryote
Hepatitis E virus genomic RNA, complete genome, isolate: wbJSG1	7240	linear	AB222182	82568712	True	AB222182	Eukaryote
Hepatitis E virus genomic RNA, complete genome, isolate: wbJTS1	7241	linear	AB222183	82568716	True	AB222183	Eukaryote
Hepatitis E virus genomic RNA, complete genome, isolate: wbJYG1	7240	linear	AB222184	82568720	True	AB222184	Eukaryote
Human immunodeficiency virus 1 proviral DNA, complete genome, isolate: GHNJ176	9677	linear	AB231894	108860404	True	AB231894	Eukaryote
Human immunodeficiency virus 1 proviral DNA, complete genome, isolate: GHNJ185	9715	linear	AB231895	108860414	True	AB231895	Eukaryote
Human immunodeficiency virus 1 proviral DNA, complete genome, isolate: GHNJ188	9753	linear	AB231896	108860424	True	AB231896	Eukaryote
Human immunodeficiency virus 1 proviral DNA, complete genome, isolate: GHNJ193	9712	linear	AB231897	108860434	True	AB231897	Eukaryote
Human immunodeficiency virus 1 proviral DNA, complete genome, isolate: GHNJ196	9758	linear	AB231898	108860444	True	AB231898	Eukaryote
Hepatitis B virus DNA, complete genome, isolate:VH10	3215	circular	AB231909	72534544	True	AB231909	Eukaryote
Melon necrotic spot virus genomic RNA, complete genome, isolate: Kochi	4261	linear	AB232926	170286075	True	AB232926	Eukaryote
Honeysuckle yellow vein mosaic virus-[Japan:Miyazaki:2001] DNA, complete genome	2759	circular	AB236323	133874356	True	AB236323	Eukaryote
Honeysuckle yellow vein virus-[Japan:Masuda:2003] DNA, complete genome	2764	circular	AB236325	133874365	True	AB236325	Eukaryote
Honeysuckle yellow vein beta-[Japan:Masuda:2003] DNA, complete genome	1344	circular	AB236326	133874372	True	AB236326	Eukaryote
Hepatitis B virus DNA, complete genome, isolate:PhHCC13	3059	circular	AB241113	95007765	True	AB241113	Eukaryote
Chrysanthemum virus B genomic RNA, complete genome, isolate: S	8990	linear	AB245142	162286859	True	AB245142	Eukaryote
Hepatitis B virus DNA, complete genome, isolate: TA112	3185	circular	AB246317	110225259	True	AB246317	Eukaryote
Hepatitis E virus genomic RNA, complete genome, isolate:HEVN1	7231	linear	AB246676	84875483	True	AB246676	Eukaryote
Hepatitis E virus genomic RNA, complete genome, isolate: swJ12-4	7241	linear	AB248522	110556586	True	AB248522	Eukaryote
Hepatitis C virus subtype 1b genomic RNA, complete genome, hiroshima acute hepatitis	9573	linear	AB249644	125490310	True	AB249644	Eukaryote
Hepatitis B virus DNA, complete genome, isolate: IH030213	3165	circular	AB250109	87886469	True	AB250109	Eukaryote
Melon necrotic spot virus genomic RNA, complete genome, strain: Chiba	4270	linear	AB250684	125987889	True	AB250684	Eukaryote
Melon necrotic spot virus genomic RNA, complete genome, strain: Yamaguchi	4269	linear	AB250687	125987907	True	AB250687	Eukaryote
Human immunodeficiency virus 1 proviral DNA, complete genome, clone: p92RW008A04	9643	linear	AB253421	114431074	True	AB253421	Eukaryote
Human immunodeficiency virus 1 proviral DNA, complete genome, clone: p92RW008A16	9636	linear	AB253422	114431084	True	AB253422	Eukaryote
Human immunodeficiency virus 1 proviral DNA, complete genome, clone: pJPDR0492AE04	9670	linear	AB253423	114431094	True	AB253423	Eukaryote
Human immunodeficiency virus 1 proviral DNA, complete genome, clone: pJPDR6824AE96	9661	linear	AB253427	114431134	True	AB253427	Eukaryote
Human immunodeficiency virus 1 proviral DNA, complete genome, clone: p92UG037A40	9690	linear	AB253429	114431154	True	AB253429	Eukaryote
Human immunodeficiency virus 1 proviral DNA, complete genome, clone: pJPDR0769BF3	9677	linear	AB253430	114431164	True	AB253430	Eukaryote
Human immunodeficiency virus 1 proviral DNA, complete genome, clone: pJPDR0769BF6	9656	linear	AB253431	114431174	True	AB253431	Eukaryote
Human immunodeficiency virus 1 proviral DNA, complete genome, clone: pBa-L	9584	linear	AB253432	114431184	True	AB253432	Eukaryote
Human immunodeficiency virus 1 proviral DNA, complete genome, clone:pJPDR2594AE90	9702	linear	AB253668	114842020	True	AB253668	Eukaryote
Human immunodeficiency virus 1 proviral DNA, complete genome, clone:pJPDR3730AE18	9627	linear	AB253676	114842100	True	AB253676	Eukaryote
Human immunodeficiency virus 1 proviral DNA, complete genome, clone:pJPDR3730AE31	9654	linear	AB253680	114842140	True	AB253680	Eukaryote
Human immunodeficiency virus 1 proviral DNA, complete genome, clone: pJPDR2192AE43	10340	linear	AB253712	114430931	True	AB253712	Eukaryote
Simian immunodeficiency virus RNA, complete genome, strain: TYO-1	9171	linear	AB253736	114842154	True	AB253736	Eukaryote
Human immunodeficiency virus 1 proviral DNA, complete genome, clone:p02ZM108C12	9696	linear	AB254141	115334361	True	AB254141	Eukaryote
Human immunodeficiency virus 1 proviral DNA, complete genome, clone:p02ZM110C07	9790	linear	AB254142	115334371	True	AB254142	Eukaryote
Human immunodeficiency virus 1 proviral DNA, complete genome, clone:p02ZM114C72	9709	linear	AB254147	115334421	True	AB254147	Eukaryote
Human immunodeficiency virus 1 proviral DNA, complete genome, clone:p02ZM115C16	9630	linear	AB254148	115334431	True	AB254148	Eukaryote
Human immunodeficiency virus 1 proviral DNA, complete genome, clone:p02ZMBCC09	9730	linear	AB254149	115334441	True	AB254149	Eukaryote
Human immunodeficiency virus 1 proviral DNA, complete genome, clone:p02ZMDBC26	9702	linear	AB254151	115334461	True	AB254151	Eukaryote
Human immunodeficiency virus 1 proviral DNA, complete genome, clone:p02ZMDBC33	9723	linear	AB254153	355390226	True	AB254153	Eukaryote
Human immunodeficiency virus 1 proviral DNA, complete genome, clone:p02ZMJMC18	9674	linear	AB254156	115334511	True	AB254156	Eukaryote
SARS coronavirus Frankfurt 1 genomic RNA, nearly complete genome, clone: persistent virus #21	29632	linear	AB257344	92698732	True	AB257344	Eukaryote
Youcai mosaic virus genomic RNA, complete genome, isolate: 722	6304	linear	AB261175	118562381	True	AB261175	Eukaryote
BK polyomavirus DNA, complete genome, strain: FNL-9	5211	circular	AB269824	154800054	True	AB269824	Eukaryote
BK polyomavirus DNA, complete genome, strain: SEC-21	5117	circular	AB269862	154800320	True	AB269862	Eukaryote
Beak and feather disease virus DNA, complete genome, isolate: MU-JP6P	2002	circular	AB277751	194239465	True	AB277751	Eukaryote
Human immunodeficiency virus 1 proviral DNA, complete genome, clone: p04JPDR5782C39	9696	linear	AB286850	119507947	True	AB286850	Eukaryote
Human immunodeficiency virus 1 proviral DNA, complete genome, clone: p03GH173_06_49	9793	linear	AB286852	119507967	True	AB286852	Eukaryote
Human immunodeficiency virus 1 proviral DNA, complete genome, clone: p0303GH195AG/06_48	9682	linear	AB286854	119507987	True	AB286854	Eukaryote
Human immunodeficiency virus 1 proviral DNA, complete genome, clone: p03GH181AG33	9724	linear	AB286856	119508007	True	AB286856	Eukaryote
Human immunodeficiency virus 1 proviral DNA, complete genome, clone: p03GH182AG48	9689	linear	AB286858	119508027	True	AB286858	Eukaryote
Human immunodeficiency virus 1 proviral DNA, complete genome, clone: p03GH184AG25	9656	linear	AB286860	119508047	True	AB286860	Eukaryote
Human immunodeficiency virus 1 proviral DNA, complete genome, clone: p03GH189AG15	9741	linear	AB286862	119508067	True	AB286862	Eukaryote
Human immunodeficiency virus 1 proviral DNA, complete genome, clone: p03GH197AG66	9671	linear	AB286863	119507226	True	AB286863	Eukaryote
Human immunodeficiency virus 1 proviral DNA, complete genome, clone: p03GH197AG85	9620	linear	AB286864	119507236	True	AB286864	Eukaryote
Human immunodeficiency virus 1 proviral DNA, complete genome, clone: p04JPDR6089B56	9669	linear	AB286956	119507329	True	AB286956	Eukaryote
Human immunodeficiency virus 1 proviral DNA, complete genome, clone: p03GH175G29	9725	linear	AB287004	119507256	True	AB287004	Eukaryote
Hepatitis B virus DNA, complete genome, isolate: Greenland-5	2987	circular	AB287324	161788807	True	AB287324	Eukaryote
Human immunodeficiency virus 1 proviral DNA, complete genome, clone: p05JPDR6538B29	9667	linear	AB287363	119507339	True	AB287363	Eukaryote
Human immunodeficiency virus 1 proviral DNA, complete genome, clone: p05JPDR6737B55	9699	linear	AB287365	119507359	True	AB287365	Eukaryote
Human immunodeficiency virus 1 proviral DNA, complete genome, clone: p05JPDR7060B68	9690	linear	AB287367	119507379	True	AB287367	Eukaryote
Human immunodeficiency virus 1 proviral DNA, complete genome, clone: p05JPDR7065B46	9700	linear	AB287368	119507389	True	AB287368	Eukaryote
Human immunodeficiency virus 1 proviral DNA, complete genome, clone: p99JPDR1348B72	9768	linear	AB287370	119507409	True	AB287370	Eukaryote
Human immunodeficiency virus 1 proviral DNA, complete genome, clone: p00JPDR2510B45	9741	linear	AB287372	119507429	True	AB287372	Eukaryote
Human immunodeficiency virus 1 proviral DNA, complete genome, clone: p92RW025A46	9638	linear	AB287377	119507276	True	AB287377	Eukaryote
Human immunodeficiency virus 1 proviral DNA, complete genome, clone: p93RW037A92	9644	linear	AB287379	119507296	True	AB287379	Eukaryote
Honeysuckle yellow vein mosaic virus-[Nara1] DNA, complete genome	2762	circular	AB287440	148781874	True	AB287440	Eukaryote
Honeysuckle yellow vein mosaic virus-[Nara2] DNA, complete genome	2762	circular	AB287441	148781881	True	AB287441	Eukaryote
Honeysuckle yellow vein mosaic disease associated satellite DNA beta-[Nara] DNA, complete genome	1337	circular	AB287443	148781890	True	AB287443	Eukaryote
Human immunodeficiency virus 1 proviral DNA, complete genome, clone: p00JPDR2508B60	9645	linear	AB289588	121581791	True	AB289588	Eukaryote
Hepatitis E virus genomic RNA, complete genome, clone: swMN06-A1288	7237	linear	AB290312	150000169	True	AB290312	Eukaryote
Hepatitis E virus genomic RNA, complete genome, clone: swMN06-C1056	7239	linear	AB290313	150000173	True	AB290313	Eukaryote
Torque teno midi virus 1 DNA, complete genome, isolate: MD1-073	3242	circular	AB290918	134026382	True	AB290918	Eukaryote
Hepatitis E virus genomic RNA, nearly complete genome, isolate: JTC-Kit-FH04L	7209	linear	AB291959	219571271	True	AB291959	Eukaryote
Hepatitis E virus genomic RNA, complete genome, isolate: JTK-Kag06C	7236	linear	AB291960	219571275	True	AB291960	Eukaryote
Hepatitis E virus genomic RNA, complete genome, isolate: JMH-Osa04C	7241	linear	AB291961	219571279	True	AB291961	Eukaryote
Hepatitis E virus genomic RNA, complete genome, isolate: JHK-Toy04C	7236	linear	AB291962	219571283	True	AB291962	Eukaryote
Hepatitis E virus genomic RNA, complete genome, isolate: JRM-Toy05C	7236	linear	AB291963	219571287	True	AB291963	Eukaryote
Hepatitis E virus genomic RNA, complete genome, isolate: JYK-Tok03C	7244	linear	AB291964	219571291	True	AB291964	Eukaryote
Hepatitis B virus DNA, complete genome, isolate: patient12	3158	circular	AB300370	157940134	True	AB300370	Eukaryote
Eupatorium yellow vein virus-[Suya] DNA, complete genome, isolate: Suya-2003	2760	circular	AB300463	169219518	True	AB300463	Eukaryote
Eupatorium yellow vein virus satellite DNA beta DNA, complete genome, isolate: Suya-2003	1359	circular	AB300464	169219525	True	AB300464	Eukaryote
Avian leukosis virus genomic RNA, complete genome, strain: TymS_90	7433	linear	AB303223	171854454	True	AB303223	Eukaryote
Torque teno midi virus DNA, complete genome, isolate: MDJHem2	3208	circular	AB303552	156622558	True	AB303552	Eukaryote
Torque teno midi virus DNA, complete genome, isolate: MDJHem3-1	3198	circular	AB303553	156622563	True	AB303553	Eukaryote
Torque teno midi virus DNA, complete genome, isolate: MDJHem3-2	3197	circular	AB303554	156622568	True	AB303554	Eukaryote
Torque teno midi virus DNA, complete genome, isolate: MDJHem5	3205	circular	AB303555	156622573	True	AB303555	Eukaryote
Torque teno midi virus DNA, complete genome, isolate: MDJHem8-1	3200	circular	AB303556	156622578	True	AB303556	Eukaryote
Torque teno midi virus DNA, complete genome, isolate: MDJHem8-2	3204	circular	AB303557	156622583	True	AB303557	Eukaryote
Torque teno midi virus DNA, complete genome, isolate: MDJN1	3223	circular	AB303558	156622588	True	AB303558	Eukaryote
Torque teno midi virus DNA, complete genome, isolate: MDJN2	3187	circular	AB303559	156622593	True	AB303559	Eukaryote
Torque teno midi virus DNA, complete genome, isolate: MDJN14	3175	circular	AB303560	156622598	True	AB303560	Eukaryote
Torque teno midi virus DNA, complete genome, isolate: MDJN47	3198	circular	AB303561	156622603	True	AB303561	Eukaryote
Torque teno midi virus DNA, complete genome, isolate: MDJN51	3187	circular	AB303562	156622608	True	AB303562	Eukaryote
Torque teno midi virus DNA, complete genome, isolate: MDJN1	3200	circular	AB303563	156622613	True	AB303563	Eukaryote
Torque teno midi virus DNA, complete genome, isolate: MDJN69	3230	circular	AB303564	156622618	True	AB303564	Eukaryote
Torque teno midi virus DNA, complete genome, isolate: MDJN91	3183	circular	AB303565	156622623	True	AB303565	Eukaryote
Torque teno midi virus DNA, complete genome, isolate: MDJN97	3223	circular	AB303566	156622628	True	AB303566	Eukaryote
Tomato leaf curl Philippine virus satellite DNA beta DNA, complete genome, isolate: Laguna1	1346	circular	AB307732	148762347	True	AB307732	Eukaryote
Mamastrovirus 1 genomic RNA, complete genome, isolate: V1347	6673	linear	AB308374	164456819	True	AB308374	Eukaryote
Apple chlorotic leaf spot virus genomic RNA, complete genome, strain: A4	7548	linear	AB326223	148921439	True	AB326223	Eukaryote
Apple chlorotic leaf spot virus genomic RNA, complete genome, strain: B6	7553	linear	AB326224	148921443	True	AB326224	Eukaryote
Apple chlorotic leaf spot virus genomic RNA, complete genome, strain: MO-5	7561	linear	AB326225	148921447	True	AB326225	Eukaryote
Bovine papillomavirus-9 DNA, complete genome	7303	circular	AB331650	163914074	True	AB331650	Eukaryote
Bovine papillomavirus-10 DNA, complete genome	7399	circular	AB331651	163914081	True	AB331651	Eukaryote
Bovine coronavirus genomic RNA, complete genome, strain: Kakegawa	31038	linear	AB354579	155369167	True	AB354579	Eukaryote
Plantago asiatica mosaic virus genomic RNA, complete genome, strain: Li6	6102	linear	AB360795	169219500	True	AB360795	Eukaryote
Plantago asiatica mosaic virus genomic RNA, complete genome, strain: Pr	6102	linear	AB360796	169219506	True	AB360796	Eukaryote
Human papillomavirus type 57c DNA, complete genome	7848	circular	AB361563	157678963	True	AB361563	Eukaryote
Rabies virus viral cRNA, complete genome, strain: BR-Pfx1	11924	linear	AB362483	260063801	True	AB362483	Eukaryote
Turnip mosaic virus genomic RNA, nearly complete genome, isolate: TUR1	9798	linear	AB362512	216409654	True	AB362512	Eukaryote
Turnip mosaic virus genomic RNA, nearly complete genome, isolate: TUR9	9798	linear	AB362513	216409656	True	AB362513	Eukaryote
BK polyomavirus DNA, complete genome, isolate: NEA-28	5247	circular	AB365140	209837793	True	AB365140	Eukaryote
Norovirus Hu/Texas/TCH04-577/2004/US genomic RNA, complete genome	7627	linear	AB365435	186659484	True	AB365435	Eukaryote
Hepatitis B virus DNA, complete genome, isolate: BOL51	3214	linear	AB365447	168986500	True	AB365447	Eukaryote
Hepatitis B virus DNA, complete genome, isolate: BOL71	3217	linear	AB365448	168986502	True	AB365448	Eukaryote
Hepatitis B virus DNA, complete genome, isolate: BOL577	3216	linear	AB365452	168986510	True	AB365452	Eukaryote
Hepatitis B virus DNA, complete genome, isolate: BOL584	3227	linear	AB365453	168986512	True	AB365453	Eukaryote
Hepatitis B virus DNA, complete genome, isolate: LAMr Pt. 24/Adefovir-treated Pt. 1, derived from a lamivudine-resistant patient	3230	circular	AB367415	198278239	True	AB367415	Eukaryote
Hepatitis B virus DNA, complete genome, Genotype C, Subgenotype C2, clone:HBV-TJ6-1	3068	circular	AB368297	160358296	True	AB368297	Eukaryote
Papaya ringspot virus genomic RNA, complete genome, strain: Korean watermelon	10326	linear	AB369277	161168458	True	AB369277	Eukaryote
Watermelon mosaic virus genomic RNA, complete genome, strain: Watermelon	10037	linear	AB369278	161168460	True	AB369278	Eukaryote
Zucchini yellow mosaic virus genomic RNA, complete genome, strain: RDA	9593	linear	AB369279	161168462	True	AB369279	Eukaryote
Hepatitis E virus genomic RNA, complete genome, genotype 4, strain: E087-SAP04C	7227	linear	AB369688	187859443	True	AB369688	Eukaryote
Hepatitis E virus genomic RNA, complete genome, genotype 3, strain: E088-STM04C	7215	linear	AB369689	187859447	True	AB369689	Eukaryote
Hepatitis E virus genomic RNA, complete genome, genotype 4, strain: E067-SIJ05C	7236	linear	AB369690	187859451	True	AB369690	Eukaryote
Hepatitis E virus genomic RNA, complete genome, genotype 3, strain: E097-OSA05C	7216	linear	AB369691	187859455	True	AB369691	Eukaryote
Bean yellow mosaic virus genomic RNA, complete genome, strain: CS	9535	linear	AB373203	163930863	True	AB373203	Eukaryote
Hepatitis A virus genomic RNA, complete genome, sub_strain: KRM003G72	7463	linear	AB425339	169118062	True	AB425339	Eukaryote
Human enterovirus 98 genomic RNA, complete genome, strain: T92-1499	7422	linear	AB426608	198041323	True	AB426608	Eukaryote
Human enterovirus 107 genomic RNA, complete genome, strain: TN94-0349	7423	linear	AB426609	198041325	True	AB426609	Eukaryote
Human enterovirus 79 genomic RNA, complete genome, strain: NH95-0601	7427	linear	AB426610	198041327	True	AB426610	Eukaryote
Human enterovirus 97 genomic RNA, complete genome, strain: DT94-0227	7413	linear	AB426611	198041329	True	AB426611	Eukaryote
Human immunodeficiency virus 1 genomic RNA, complete genome, isolate: #117	8677	linear	AB428551	186940871	True	AB428551	Eukaryote
Human immunodeficiency virus 1 genomic RNA, complete genome, isolate: #134	8689	linear	AB428552	186940881	True	AB428552	Eukaryote
Human immunodeficiency virus 1 genomic RNA, complete genome, isolate: #194	8731	linear	AB428553	186940891	True	AB428553	Eukaryote
Human immunodeficiency virus 1 genomic RNA, complete genome, isolate: #197	8719	linear	AB428554	186940901	True	AB428554	Eukaryote
Human immunodeficiency virus 1 genomic RNA, complete genome, isolate: #227	8723	linear	AB428555	186940911	True	AB428555	Eukaryote
Human immunodeficiency virus 1 genomic RNA, complete genome, isolate: #426	8723	linear	AB428556	186940921	True	AB428556	Eukaryote
Human immunodeficiency virus 1 genomic RNA, complete genome, isolate: #436	8690	linear	AB428557	186940931	True	AB428557	Eukaryote
Human immunodeficiency virus 1 genomic RNA, complete genome, isolate: #398	8701	linear	AB428560	186940961	True	AB428560	Eukaryote
Human immunodeficiency virus 1 genomic RNA, complete genome, isolate: #472	8680	linear	AB428561	186940971	True	AB428561	Eukaryote
Human immunodeficiency virus 1 genomic RNA, complete genome, isolate: #574	8698	linear	AB428562	186940981	True	AB428562	Eukaryote
Human parechovirus 4 genomic RNA, complete genome, strain: Fuk2005-123	7349	linear	AB433629	194578171	True	AB433629	Eukaryote
Eupatorium yellow vein virus-[Japan: Kagawa: Tomato: 1997] DNA, complete genome	2767	circular	AB433979	195963299	True	AB433979	Eukaryote
Murine norovirus genomic RNA, complete genome, strain: S7-PP3	7382	linear	AB435515	219565724	True	AB435515	Eukaryote
Turnip mosaic virus genomic RNA, nearly complete genome, isolate: IRN SS5	9797	linear	AB440239	296531310	True	AB440239	Eukaryote
Hepatitis C virus subtype 1b genomic RNA, complete genome, clone: 1B-4	9587	linear	AB442219	218744560	True	AB442219	Eukaryote
Hepatitis C virus subtype 1b genomic RNA, complete genome, clone: KAH5	9587	linear	AB442220	218744562	True	AB442220	Eukaryote
Hepatitis C virus subtype 1b genomic RNA, complete genome, clone: KAH4	9587	linear	AB442221	218744564	True	AB442221	Eukaryote
Hepatitis C virus subtype 1b genomic RNA, complete genome, clone: 1B-5	9590	linear	AB442222	218744566	True	AB442222	Eukaryote
Norovirus Hu/GII-4/Sakai2/2006/JP genomic RNA, complete genome	7511	linear	AB447448	198041423	True	AB447448	Eukaryote
Human adenovirus 8 genomic DNA, complete genome, isolate: 8b	34962	linear	AB448768	222143610	True	AB448768	Eukaryote
Human adenovirus 19 genomic DNA, complete genome, isolate: AV-587	35125	linear	AB448771	222143721	True	AB448771	Eukaryote
Human adenovirus 37 genomic DNA, complete genome, isolate: 2004	35152	linear	AB448778	222143980	True	AB448778	Eukaryote
Torque teno midi virus DNA, complete genome, isolate: Pt-TTMDV210	3257	circular	AB449062	213972659	True	AB449062	Eukaryote
Torque teno midi virus DNA, complete genome, isolate: Pt-TTMDV225-1	3256	circular	AB449063	213972664	True	AB449063	Eukaryote
Torque teno midi virus DNA, complete genome, isolate: Pt-TTMDV225-2	3269	circular	AB449064	213972669	True	AB449064	Eukaryote
Sweet potato feathery mottle virus genomic RNA, complete genome, strain: ordinary	10895	linear	AB465608	293329634	True	AB465608	Eukaryote
Human immunodeficiency virus 1 proviral DNA, complete genome, clone: p03GH194AG48	9702	linear	AB480046	255069220	True	AB480046	Eukaryote
Human immunodeficiency virus 1 proviral DNA, complete genome, clone: p03GH179AG/G29	9673	linear	AB480048	255069240	True	AB480048	Eukaryote
Human immunodeficiency virus 1 proviral DNA, complete genome, clone: p04JPDR6082F37	9637	linear	AB480299	255519521	True	AB480299	Eukaryote
Human immunodeficiency virus 1 proviral DNA, complete genome, clone: p04JPDR6190F90	9611	linear	AB480301	255519541	True	AB480301	Eukaryote
Human immunodeficiency virus 1 proviral DNA, complete genome, clone: p04JPDR6174B82	9653	linear	AB480693	255708269	True	AB480693	Eukaryote
Human immunodeficiency virus 1 proviral DNA, complete genome, clone: p04JPDR6175B30	9593	linear	AB480694	255708279	True	AB480694	Eukaryote
Human immunodeficiency virus 1 proviral DNA, complete genome, clone: p04JPDR6175B54	9632	linear	AB480695	255708289	True	AB480695	Eukaryote
Human immunodeficiency virus 1 proviral DNA, complete genome, clone: p04JPDR5913B59	9671	linear	AB480697	255708309	True	AB480697	Eukaryote
Human immunodeficiency virus 1 proviral DNA, complete genome, clone: p98JPDR1120B22	9702	linear	AB480698	255708319	True	AB480698	Eukaryote
Swine hepatitis E virus genomic RNA, complete genome, isolate: swJB-E10	7239	linear	AB481226	223670933	True	AB481226	Eukaryote
Swine hepatitis E virus genomic RNA, complete genome, isolate: swJB-H7	7253	linear	AB481227	223670937	True	AB481227	Eukaryote
Swine hepatitis E virus genomic RNA, complete genome, isolate: swJB-M8	7267	linear	AB481228	223670941	True	AB481228	Eukaryote
Swine hepatitis E virus genomic RNA, complete genome, isolate: swJR-P5	7239	linear	AB481229	223670945	True	AB481229	Eukaryote
Human immunodeficiency virus 1 proviral DNA, complete genome, clone: pPRD320-01A44	9630	linear	AB485632	256252312	True	AB485632	Eukaryote
Human immunodeficiency virus 1 proviral DNA, complete genome, clone: pPRD320-02A31	9633	linear	AB485633	256252322	True	AB485633	Eukaryote
Human immunodeficiency virus 1 proviral DNA, complete genome, clone: pPRD320-03AG06	9679	linear	AB485634	256252332	True	AB485634	Eukaryote
Human immunodeficiency virus 1 proviral DNA, complete genome, clone: pPRD320-03AG90	9637	linear	AB485635	256252342	True	AB485635	Eukaryote
Human immunodeficiency virus 1 proviral DNA, complete genome, clone: pPRD320-04AG31	9633	linear	AB485637	256252362	True	AB485637	Eukaryote
Human immunodeficiency virus 1 proviral DNA, complete genome, clone: pPRD320-05B59	9629	linear	AB485640	256252392	True	AB485640	Eukaryote
Human immunodeficiency virus 1 proviral DNA, complete genome, clone: pPRD320-06B11	9662	linear	AB485642	256252412	True	AB485642	Eukaryote
Human immunodeficiency virus 1 proviral DNA, complete genome, clone: pPRD320-07C10	9607	linear	AB485643	256252422	True	AB485643	Eukaryote
Human immunodeficiency virus 1 proviral DNA, complete genome, clone: pPRD320-08C21	9699	linear	AB485647	256252228	True	AB485647	Eukaryote
Human immunodeficiency virus 1 proviral DNA, complete genome, clone: pPRD320-09D61	9616	linear	AB485649	256252248	True	AB485649	Eukaryote
Human immunodeficiency virus 1 proviral DNA, complete genome, clone: pPRD320-10D81	9683	linear	AB485651	256252268	True	AB485651	Eukaryote
Human immunodeficiency virus 1 proviral DNA, complete genome, clone: pPRD320-11AE80	9648	linear	AB485653	256252288	True	AB485653	Eukaryote
Human immunodeficiency virus 1 proviral DNA, complete genome, clone: pPRD320-12AE10	9671	linear	AB485655	256252605	True	AB485655	Eukaryote
Human immunodeficiency virus 1 proviral DNA, complete genome, clone: pPRD320-13F58	9602	linear	AB485657	256252455	True	AB485657	Eukaryote
Human immunodeficiency virus 1 proviral DNA, complete genome, clone: pPRD320-14F47	9747	linear	AB485659	256252475	True	AB485659	Eukaryote
Human immunodeficiency virus 1 proviral DNA, complete genome, clone: pPRD320-15G82	9743	linear	AB485661	256252495	True	AB485661	Eukaryote
Human immunodeficiency virus 1 proviral DNA, complete genome, clone: pPRD320-16G46	9707	linear	AB485663	256252515	True	AB485663	Eukaryote
Human immunodeficiency virus 1 proviral DNA, complete genome, clone: pPRD320-17H13	9691	linear	AB485665	256252535	True	AB485665	Eukaryote
Human immunodeficiency virus 1 proviral DNA, complete genome, clone: pPRD320-18O04	9811	linear	AB485666	256252545	True	AB485666	Eukaryote
Human immunodeficiency virus 1 proviral DNA, complete genome, clone: pPRD320-18O24	9813	linear	AB485667	256252555	True	AB485667	Eukaryote
Human immunodeficiency virus 1 proviral DNA, complete genome, clone: pPRD320-19O33	9881	linear	AB485669	256252575	True	AB485669	Eukaryote
Human immunodeficiency virus 2 proviral DNA, complete genome, clone: pPRD320-20HIV2_57	10235	linear	AB485671	256252595	True	AB485671	Eukaryote
BK polyomavirus DNA, complete genome, isolate: MT clone 11	5345	circular	AB485697	224175961	True	AB485697	Eukaryote
BK polyomavirus DNA, complete genome, isolate: MT clone 32	5361	circular	AB485700	224175982	True	AB485700	Eukaryote
BK polyomavirus DNA, complete genome, isolate: MT clone 44	5374	circular	AB485701	224175989	True	AB485701	Eukaryote
Hepatitis B virus DNA, complete genome, clone: JRB34	3182	circular	AB486012	255958131	True	AB486012	Eukaryote
Hepatitis B virus DNA, complete genome, isolate: P48	3212	circular	AB493831	226371577	True	AB493831	Eukaryote
Human immunodeficiency virus 2 proviral DNA, complete genome, isolate: 08JP.NMC842	10250	linear	AB499695	299508009	True	AB499695	Eukaryote
Human metapneumovirus genomic RNA, complete genome, isolate: Jpn03-1	13337	linear	AB503857	237874135	True	AB503857	Eukaryote
Omsk hemorrhagic fever virus genomic RNA, complete genome, strain: Guriev	10888	linear	AB507800	239914114	True	AB507800	Eukaryote
Rice yellow stunt virus viral cRNA, complete genome, country: Japan:Okinawa, ishigaki	14029	linear	AB516283	290490537	True	AB516283	Eukaryote
Rabies virus viral cRNA, complete genome, isolate: BR-Pfx3	11925	linear	AB517660	374428445	True	AB517660	Eukaryote
Rabies virus viral cRNA, complete genome, isolate: BR-DR1	11923	linear	AB519642	341865516	True	AB519642	Eukaryote
Hepatitis C virus subtype 1a genomic RNA, complete genome, strain: HCV-RMT	9598	linear	AB520610	257286216	True	AB520610	Eukaryote
Avian leukosis virus proviral DNA, complete genome	7750	linear	AB522906	345050319	True	AB522906	Eukaryote
Newcastle disease virus viral cRNA, complete genome, strain: 9a3b	15198	linear	AB534205	284010124	True	AB534205	Eukaryote
HBV genotype C DNA, complete genome, strain: C0901177(NT3)	3215	circular	AB540583	295841670	True	AB540583	Eukaryote
Norovirus Hu/GII-4/Miyazaki9/2008/JP genomic RNA, nearly complete genome	7263	linear	AB541300	302128610	True	AB541300	Eukaryote
Bovine papillomavirus type 11 DNA, complete genome	7251	circular	AB543507	301335131	True	AB543507	Eukaryote
Rinderpest virus genomic RNA, complete genome, strain: Fusan strain cattle type	15882	linear	AB547189	336174568	True	AB547189	Eukaryote
Human immunodeficiency virus 1 proviral DNA, nearly complete genome, clone: 07IDJKT194-C	8857	linear	AB547464	289449315	True	AB547464	Eukaryote
Avian metapneumovirus viral cRNA, complete genome, strain: VCO3/60616	13508	linear	AB548428	310772458	True	AB548428	Eukaryote
Human parvovirus B19 DNA, complete genome, isolate: F27	5588	linear	AB550331	291045153	True	AB550331	Eukaryote
Human enterovirus 71 genomic RNA, complete genome, strain: SK-EV006-LPS1	7410	linear	AB550335	315467918	True	AB550335	Eukaryote
Human circular dsDNA virus associated with alcoholic cirrhosis DNA, complete genome	9496	circular	AB550431	306408163	True	AB550431	Eukaryote
Poinsettia mosaic virus genomic RNA, complete genome, isolate: JN	6095	linear	AB550788	302698743	True	AB550788	Eukaryote
Murine hepatitis virus RNA, complete genome, strain: MHV-MI	31428	linear	AB551247	293330422	True	AB551247	Eukaryote
Rhizophagus sp. RF1 medium virus genomic RNA, complete genome	4557	linear	AB558119	309949428	True	AB558119	Eukaryote
Rhizophagus sp. RF1 mitovirus genomic RNA, complete genome	2895	linear	AB558120	546204434	True	AB558120	Eukaryote
Hepatitis C virus isolate M2123 genomic RNA, nearly complete genome	9463	linear	AB558135	354459345	True	AB558135	Eukaryote
Human adenovirus D DNA, complete genome, isolate: 2307-S	35067	linear	AB562588	308152983	True	AB562588	Eukaryote
Human immunodeficiency virus 1 proviral DNA, complete genome, clone: pJPDR1673B08	9680	linear	AB564744	313574234	True	AB564744	Eukaryote
Human immunodeficiency virus 1 proviral DNA, complete genome, clone: pJRC05B34	9788	linear	AB565498	313661097	True	AB565498	Eukaryote
Human immunodeficiency virus 1 proviral DNA, complete genome, clone: pJRC53B67	9691	linear	AB565500	313661117	True	AB565500	Eukaryote
Human immunodeficiency virus 1 proviral DNA, complete genome, clone: pJRC65B30	9670	linear	AB565502	313661137	True	AB565502	Eukaryote
Human immunodeficiency virus 1 proviral DNA, complete genome, clone: pJRC77AE31	9634	linear	AB565504	313661157	True	AB565504	Eukaryote
Bovine viral diarrhea virus 2 genomic RNA, complete genome, strain: Hokudai-Lab/09	12286	linear	AB567658	298228881	True	AB567658	Eukaryote
Hepatitis E virus genomic RNA, complete genome, isolate: JBOAR135-Shiz09	7267	linear	AB573435	323508474	True	AB573435	Eukaryote
Hepatitis E virus genomic RNA, complete genome, strain: JMNG26-Oki08	7236	linear	AB591733	327165062	True	AB591733	Eukaryote
Hepatitis E virus genomic RNA, complete genome, strain: JMNG36-Oki08	7249	linear	AB591734	327165066	True	AB591734	Eukaryote
Hepatitis E virus type 3 genomic RNA, complete genome, isolate: JE03-1760F_p10/B	7246	linear	AB593690	353677858	True	AB593690	Eukaryote
Murine norovirus genomic RNA, complete genome, strain: MT30-2	7383	linear	AB601769	375268440	True	AB601769	Eukaryote
Human enterovirus 68 genomic RNA, complete genome, strain: JPOC10-378	7331	linear	AB601883	344313147	True	AB601883	Eukaryote
Hepatitis E virus genomic RNA, complete genome, isolate: wbJOY_06	7261	linear	AB602441	319802970	True	AB602441	Eukaryote
East Asian Passiflora virus genomic RNA, complete genome, strain: IB	9982	linear	AB604610	345134883	True	AB604610	Eukaryote
Human immunodeficiency virus 1 proviral DNA, complete genome, clone: pJPDR1712B80	9667	linear	AB604947	315258592	True	AB604947	Eukaryote
Human immunodeficiency virus 1 proviral DNA, complete genome, clone: pJPDR1777B14	9915	linear	AB604948	315258494	True	AB604948	Eukaryote
Human immunodeficiency virus 1 proviral DNA, complete genome, clone: pJPDR2735B05	9695	linear	AB604949	315258504	True	AB604949	Eukaryote
Human immunodeficiency virus 1 proviral DNA, complete genome, clone: pJPDR5929B14	9684	linear	AB604951	315258524	True	AB604951	Eukaryote
Human adenovirus D DNA, complete genome, isolate: 870006C/Hiroshima/1987	35048	linear	AB605240	315258818	True	AB605240	Eukaryote
Human adenovirus D DNA, complete genome, isolate: 880249C/Hiroshima/1988	35045	linear	AB605241	315258855	True	AB605241	Eukaryote
Human adenovirus D DNA, complete genome, isolate: 890357C/Hiroshima/1989	35118	linear	AB605242	315258891	True	AB605242	Eukaryote
Human adenovirus 53 DNA, complete genome, isolate: FS165/Fukui/2004	35116	linear	AB605246	315259037	True	AB605246	Eukaryote
Rabies virus viral cRNA, comploete genome, strain: BR-BAT34	11924	linear	AB608731	395343012	True	AB608731	Eukaryote
Blueberry latent virus genomic RNA, complete genome, Japanese isolate	3434	linear	AB608991	339895713	True	AB608991	Eukaryote
Simian retrovirus Y proviral DNA, complete genome, strain: Y001	8145	linear	AB611707	427190949	True	AB611707	Eukaryote
Herpes simplex virus (type 1 /strain RH2) DNA, nearly complete genome	149643	linear	AB618031	430768498	True	AB618031	Eukaryote
HBV genotype G DNA, complete genome, isolate: MEX921M	3179	circular	AB625343	383082105	True	AB625343	Eukaryote
Rehmannia mosaic virus genomic RNA, complete genome, isolate: Japanese	6395	linear	AB628188	354721027	True	AB628188	Eukaryote
Bamboo mosaic virus genomic RNA, complete genome, isolate: BaMv-Au	6365	linear	AB636267	345134901	True	AB636267	Eukaryote
Human immunodeficiency virus 1 proviral DNA, complete genome, clone: pJRC57B05	9675	linear	AB641837	411026232	True	AB641837	Eukaryote
HBV recombinant B/C DNA, complete genome, isolate: NAB20	3203	circular	AB644282	349731646	True	AB644282	Eukaryote
HBV recombinant C/G DNA, complete genome, isolate: NAB46	3164	circular	AB644285	349731661	True	AB644285	Eukaryote
Human immunodeficiency virus 1 proviral DNA, complete genome, clone: pHIV-1 Y271B01AE64	9674	linear	AB646691	373249007	True	AB646691	Eukaryote
Human echovirus 3 genomic RNA, complete genome, strain: OC10-798	7428	linear	AB647326	343098294	True	AB647326	Eukaryote
Avian leukosis virus RNA, complete genome, strain: Oki_009	7497	linear	AB669433	379697619	True	AB669433	Eukaryote
Avian leukosis virus RNA, complete genome, strain: Shiz_001	7361	linear	AB669568	379698096	True	AB669568	Eukaryote
Avian leukosis virus RNA, complete genome, strain: CTS_016	7515	linear	AB669569	379698100	True	AB669569	Eukaryote
Avian leukosis virus RNA, complete genome, strain: Km_5666	7436	linear	AB669896	379698120	True	AB669896	Eukaryote
Avian leukosis virus RNA, complete genome, strain: Km_5845	7406	linear	AB670314	379698132	True	AB670314	Eukaryote
Feline leukemia virus DNA, complete genome, clone: pJ7E2	8837	linear	AB672612	407725321	True	AB672612	Eukaryote
Viral hemorrhagic septicemia virus viral cRNA, complete genome, strain: 4p168	11158	linear	AB672616	751368045	True	AB672616	Eukaryote
Hepatitis B virus DNA, complete genome, isolate: AnkaraE33	3065	circular	AB674414	442564508	True	AB674414	Eukaryote
Hepatitis B virus DNA, complete genome, isolate: AnkaraE15	3125	circular	AB674422	442564544	True	AB674422	Eukaryote
Hepatitis B virus DNA, complete genome, isolate: GaziantepLCC2	3074	circular	AB674430	442564586	True	AB674430	Eukaryote
Hepatitis B virus DNA, complete genome, isolate: IstambulB24	2966	circular	AB674435	442564610	True	AB674435	Eukaryote
Hepatitis B virus DNA, complete genome, isolate: SamsunD74	3145	circular	AB674437	442564618	True	AB674437	Eukaryote
Hepatitis B virus DNA, complete genome, isolate: 10B20	3256	circular	AB675682	353351750	True	AB675682	Eukaryote
Avian leukosis virus RNA, complete genome, strain: Km_5892	7422	linear	AB682778	387598022	True	AB682778	Eukaryote
Hepatitis C virus subtype 2a genomic RNA, complete genome, strain: JFH2.1	9683	linear	AB690460	393714878	True	AB690460	Eukaryote
Hepatitis C virus subtype 2a genomic RNA, complete genome, strain: J6CF/JFH2.1	9683	linear	AB690461	393714880	True	AB690461	Eukaryote
Hepatitis C virus subtype 3a genomic RNA, complete genome, strain: S310/B	9654	linear	AB691596	403220373	True	AB691596	Eukaryote
Hepatitis C virus subtype 1b genomic RNA, complete genome, strain: NC1	9607	linear	AB691953	394933775	True	AB691953	Eukaryote
Potato virus T genomic RNA, complete genome, isolate: Japanese	6544	linear	AB697482	388596124	True	AB697482	Eukaryote
Hepatitis E virus genomic RNA, nearly complete genome, isolate: JTF-Yamagu11	7236	linear	AB698654	401664159	True	AB698654	Eukaryote
Gentian Kobu-sho-associated virus RNA, complete genome, isolate: Nishiwaga	22776	linear	AB698918	444908223	True	AB698918	Eukaryote
Turnip mosaic virus genomic RNA, nearly complete genome, isolate: OS	9791	linear	AB701693	460837901	True	AB701693	Eukaryote
Turnip mosaic virus genomic RNA, nearly complete genome, isolate: DEU7	9794	linear	AB701695	460837905	True	AB701695	Eukaryote
Turnip mosaic virus genomic RNA, nearly complete genome, isolate: GK1	9795	linear	AB701696	460837907	True	AB701696	Eukaryote
Turnip mosaic virus genomic RNA, nearly complete genome, isolate: ASP	9796	linear	AB701697	460837909	True	AB701697	Eukaryote
Turnip mosaic virus genomic RNA, nearly complete genome, isolate: BEL1	9797	linear	AB701698	460837911	True	AB701698	Eukaryote
Turnip mosaic virus genomic RNA, nearly complete genome, isolate: DEU4	9798	linear	AB701701	460837917	True	AB701701	Eukaryote
Turnip mosaic virus genomic RNA, nearly complete genome, isolate: Eru1D	9798	linear	AB701705	460837925	True	AB701705	Eukaryote
Turnip mosaic virus genomic RNA, nearly complete genome, isolate: ESP1	9798	linear	AB701706	460837927	True	AB701706	Eukaryote
Turnip mosaic virus genomic RNA, nearly complete genome, isolate: ESP2	9798	linear	AB701707	460837929	True	AB701707	Eukaryote
Turnip mosaic virus genomic RNA, nearly complete genome, isolate: GBR8	9798	linear	AB701710	460837935	True	AB701710	Eukaryote
Turnip mosaic virus genomic RNA, nearly complete genome, isolate: GBR83	9798	linear	AB701717	460837949	True	AB701717	Eukaryote
Turnip mosaic virus genomic RNA, nearly complete genome, isolate: ITA1A	9798	linear	AB701720	460837955	True	AB701720	Eukaryote
Turnip mosaic virus genomic RNA, nearly complete genome, isolate: ITA2	9798	linear	AB701721	460837957	True	AB701721	Eukaryote
Turnip mosaic virus genomic RNA, nearly complete genome, isolate: ITA5	9798	linear	AB701723	460837961	True	AB701723	Eukaryote
Turnip mosaic virus genomic RNA, nearly complete genome, isolate: ITA6	9798	linear	AB701724	460837963	True	AB701724	Eukaryote
Turnip mosaic virus genomic RNA, nearly complete genome, isolate: ITA8	9798	linear	AB701725	460837965	True	AB701725	Eukaryote
Turnip mosaic virus genomic RNA, nearly complete genome, isolate: ITA9A	9798	linear	AB701726	460837967	True	AB701726	Eukaryote
Turnip mosaic virus genomic RNA, nearly complete genome, isolate: PRT1	9798	linear	AB701729	460837973	True	AB701729	Eukaryote
Turnip mosaic virus genomic RNA, nearly complete genome, isolate: PV0054	9798	linear	AB701730	460837975	True	AB701730	Eukaryote
Turnip mosaic virus genomic RNA, nearly complete genome, isolate: TIGD	9798	linear	AB701735	460837985	True	AB701735	Eukaryote
Turnip mosaic virus genomic RNA, nearly complete genome, isolate: PV134	9798	linear	AB701737	460837989	True	AB701737	Eukaryote
Turnip mosaic virus genomic RNA, nearly complete genome, isolate: USA4	9798	linear	AB701739	460837993	True	AB701739	Eukaryote
Turnip mosaic virus genomic RNA, nearly complete genome, isolate: USA6	9798	linear	AB701741	460837997	True	AB701741	Eukaryote
Turnip mosaic virus genomic RNA, nearly complete genome, isolate: GBR51	9799	linear	AB701742	460837999	True	AB701742	Eukaryote
Human immunodeficiency virus 1 genomic RNA, nearly complete genome, isolate: 10IR.THR01F	8636	linear	AB703607	402534161	True	AB703607	Eukaryote
Human immunodeficiency virus 1 genomic RNA, nearly complete genome, isolate: 10IR.THR09F	8657	linear	AB703608	402534171	True	AB703608	Eukaryote
Human immunodeficiency virus 1 genomic RNA, nearly complete genome, isolate: 11IR.KSH24F	8638	linear	AB703609	402534181	True	AB703609	Eukaryote
Human immunodeficiency virus 1 genomic RNA, nearly complete genome, isolate: 11IR.SYZ27F	8640	linear	AB703610	402534191	True	AB703610	Eukaryote
Human immunodeficiency virus 1 genomic RNA, nearly complete genome, isolate: 11IR.KSH29F	8626	linear	AB703611	402534201	True	AB703611	Eukaryote
Human immunodeficiency virus 1 genomic RNA, nearly complete genome, isolate: 11IR.KSH31F	8671	linear	AB703612	402534211	True	AB703612	Eukaryote
Human immunodeficiency virus 1 genomic RNA, nearly complete genome, isolate: 11IR.SYZ33F	8704	linear	AB703613	402534221	True	AB703613	Eukaryote
Human immunodeficiency virus 1 genomic RNA, nearly complete genome, isolate: 11IR.SYZ38F	8677	linear	AB703614	402534231	True	AB703614	Eukaryote
Human immunodeficiency virus 1 genomic RNA, nearly complete genome, isolate: 10IR.THR41F	8665	linear	AB703615	402534241	True	AB703615	Eukaryote
Human immunodeficiency virus 1 genomic RNA, nearly complete genome, isolate: 10IR.THR48F	8667	linear	AB703616	402534251	True	AB703616	Eukaryote
Moroccan pepper virus genomic RNA, complete genome, isolate: Lisianthus	4771	linear	AB704411	549065354	True	AB704411	Eukaryote
Potato virus Y genomic RNA, complete genome, isolate: T13	9703	linear	AB714135	482427295	True	AB714135	Eukaryote
Hepatitis E virus genomic RNA, nearly complete genome, isolate: E13-Ban10	7186	linear	AB720035	514236660	True	AB720035	Eukaryote
Human immunodeficiency virus 1 proviral DNA, complete genome, clone: 08JP_NMC104_clone_09	9678	linear	AB731664	442564659	True	AB731664	Eukaryote
Human immunodeficiency virus 1 proviral DNA, complete genome, clone: 09JP_NMC127_clone_27	9690	linear	AB731668	442564699	True	AB731668	Eukaryote
Human immunodeficiency virus 1 proviral DNA, complete genome, clone: 11JP_NMC851C_clone_48	9725	linear	AB731670	442564719	True	AB731670	Eukaryote
Human immunodeficiency virus 2 proviral DNA, complete genome, clone: 07JP_NMC716_clone_03	10213	linear	AB731741	442564778	True	AB731741	Eukaryote
Human immunodeficiency virus 2 proviral DNA, complete genome, clone: 08JP_NMC786_clone_43	10301	linear	AB731743	442564798	True	AB731743	Eukaryote
Human immunodeficiency virus 2 proviral DNA, complete genome, clone: 08JP_NMC842_clone_23	10240	linear	AB731745	442564818	True	AB731745	Eukaryote
Hepatitis E virus RNA, complete genome, clone: rbIM199	7300	linear	AB740220	427187230	True	AB740220	Eukaryote
Hepatitis E virus RNA, complete genome, clone: rbIM022	7305	linear	AB740221	427187234	True	AB740221	Eukaryote
Hepatitis E virus RNA, complete genome, clone: rbIM004	7307	linear	AB740222	427187238	True	AB740222	Eukaryote
Hepatitis E virus RNA, complete genome, isolate: G3-HEV83-2-27	7266	linear	AB740232	446512542	True	AB740232	Eukaryote
Human papillomavirus DNA, complete genome, strain: TM	7779	circular	AB745694	457866359	True	AB745694	Eukaryote
Human immunodeficiency virus 1 proviral DNA, nearly complete genome, clone: p01CH-DL001_08_BC06	9503	linear	AB746342	411026233	True	AB746342	Eukaryote
Human immunodeficiency virus 1 proviral DNA, nearly complete genome, clone: p01CH-DL001_08_BC37	9542	linear	AB746343	411026234	True	AB746343	Eukaryote
Human immunodeficiency virus 1 proviral DNA, nearly complete genome, clone: p00CH-WS035_08_BC52	9634	linear	AB746345	411026236	True	AB746345	Eukaryote
Human adenovirus 8 DNA, complete genome, strain: Trim variant	34978	linear	AB746853	419590108	True	AB746853	Eukaryote
Human adenovirus 10 DNA, complete genome, strain: contaminant in the ATCC HAdV-8 stock	35105	linear	AB746854	419590145	True	AB746854	Eukaryote
Enterovirus A71 genomic RNA, complete genome, strain: Nagoya, clone: pBREV71-Nagoya-EE	7412	linear	AB747374	533112460	True	AB747374	Eukaryote
Enterovirus A71 genomic RNA, complete genome, strain: 02363-Thai-02	7409	linear	AB747375	533112462	True	AB747375	Eukaryote
Dak Nong virus RNA, complete genome	20307	linear	AB753015	608617408	True	AB753015	Eukaryote
Canine distemper virus viral cRNA, nearly complete genome, strain: Ac96I-H358	15675	linear	AB753776	410175729	True	AB753776	Eukaryote
Avian paramyxovirus 6 viral cRNA, complete genome, strain: red-necked stint/Japan/8KS0813/2008	16230	linear	AB759118	410175758	True	AB759118	Eukaryote
Avian leukosis virus RNA, complete genome, strain: Km_6349	7374	linear	AB764106	425875135	True	AB764106	Eukaryote
Avian leukosis virus RNA, complete genome, strain: Yg_6100	7341	linear	AB764107	425875139	True	AB764107	Eukaryote
Human adenovirus Chiba_E086/2012 DNA, complete genome	35198	linear	AB765926	591985675	True	AB765926	Eukaryote
Nilaparvata lugens honeydew virus-1 genomic RNA, complete genome, isolate: Izumo	10967	linear	AB766259	496526989	True	AB766259	Eukaryote
Human immunodeficiency virus 1 proviral DNA, nearly complete genome, clone: p00CH-HH090_08_BC02	9592	linear	AB773884	433364563	True	AB773884	Eukaryote
Human immunodeficiency virus 1 proviral DNA, nearly complete genome, clone: p00CH-HH090_08_BC30	9598	linear	AB773885	433364573	True	AB773885	Eukaryote
Coxsackievirus A6 genomic RNA, complete genome, strain: Kyoto1	7434	linear	AB779614	574139773	True	AB779614	Eukaryote
Coxsackievirus A6 genomic RNA, complete genome, strain: Kyoto2	7434	linear	AB779616	574139777	True	AB779616	Eukaryote
Coxsackievirus A6 genomic RNA, complete genome, strain: Kyoto4	7434	linear	AB779617	574139779	True	AB779617	Eukaryote
Hepatitis C virus subtype 1b RNA, nearly complete genome, isolate: LyHCVpmbcSR	9381	linear	AB779679	451953535	True	AB779679	Eukaryote
Hepatitis E virus genomic RNA, nearly complete genome, isolate: JBOAR111-Mie11	7165	linear	AB780452	526117292	True	AB780452	Eukaryote
Chaetoceros setoense DNA virus DNA, complete genome	5836	circular	AB781089	520189895	True	AB781089	Eukaryote
Hepatitis C virus subtype 3a genomic RNA, complete genome, strain: HCV-TYMM	9649	linear	AB792683	528533052	True	AB792683	Eukaryote
Human papillomavirus type 78 DNA, complete genome, isolate: z008	7805	circular	AB793779	629266009	True	AB793779	Eukaryote
Hepatitis C virus subtype 4a genomic RNA, complete genome, isolate: HCVgenotype4a-KM	9545	linear	AB795432	459351671	True	AB795432	Eukaryote
Porcine reproductive and respiratory syndrome virus genomic RNA, nearly complete genome, strain: EDRD-1	15311	linear	AB811785	664641480	True	AB811785	Eukaryote
Porcine reproductive and respiratory syndrome virus genomic RNA, nearly complete genome, strain: Nagasaki11-14	15313	linear	AB811786	664641489	True	AB811786	Eukaryote
Porcine reproductive and respiratory syndrome virus genomic RNA, nearly complete genome, strain: Jam2	15304	linear	AB811787	664641498	True	AB811787	Eukaryote
Porcine reproductive and respiratory syndrome virus genomic RNA, nearly complete genome, strain: Yamagata10-7	15308	linear	AB811788	664641507	True	AB811788	Eukaryote
Porcine reproductive and respiratory syndrome virus genomic RNA, nearly complete genome, strain: Aomori10-5	15284	linear	AB811789	664641516	True	AB811789	Eukaryote
Human papillomavirus type 16 genomic DNA, complete genome, isolate: JP1773	7903	circular	AB818690	525341920	True	AB818690	Eukaryote
Hepatitis B virus genomic DNA, complete genome, strain: H001	3215	circular	AB818694	618734570	True	AB818694	Eukaryote
Hepatitis B virus DNA, complete genome, isolate: F001-11	3217	circular	AB819066	619533519	True	AB819066	Eukaryote
Human papillomavirus type 52 genomic DNA, complete genome, isolate: JP0313	7960	linear	AB819274	525341975	True	AB819274	Eukaryote
Human papillomavirus type 58 genomic DNA, complete genome, isolate: JP1870	7836	linear	AB819279	525342020	True	AB819279	Eukaryote
HBV genotype B DNA, complete genome, isolate: pBS-HBVB1_1005425-1.3G_wt-wt	4224	linear	AB819614	645910295	True	AB819614	Eukaryote
HBV genotype C DNA, complete genome, isolate: pBS-HBVC2_0500005-1.3G_wt-wt	4224	linear	AB819618	645929382	True	AB819618	Eukaryote
Hepatitis B virus DNA, complete genome, isolate: KWgib6	3182	circular	AB823658	743965813	True	AB823658	Eukaryote
Hepatitis B virus DNA, complete genome, isolate: KWgib7	3191	circular	AB823659	743965822	True	AB823659	Eukaryote
Hepatitis B virus DNA, complete genome, isolate: KWgib8	3191	circular	AB823660	743965832	True	AB823660	Eukaryote
Hepatitis B virus DNA, complete genome, isolate: KWgib9	3182	circular	AB823661	743965843	True	AB823661	Eukaryote
Hepatitis B virus DNA, complete genome, isolate: KWgib10	3182	circular	AB823662	743965853	True	AB823662	Eukaryote
Canine distemper virus viral cRNA, nearly complete genome, strain: 007Lm-H358p8	15679	linear	AB823707	556503165	True	AB823707	Eukaryote
Human herpesvirus 4 DNA, complete genome, strain: 1 LGY-C666-1	171021	circular	AB828190	731173847	True	AB828190	Eukaryote
Human herpesvirus 4 DNA, complete genome, strain: 1 LGY-Raji	166107	circular	AB828191	731173911	True	AB828191	Eukaryote
Hepatitis C virus subtype 1b genomic RNA, complete genome, strain: Pt1-98_Q2	9597	linear	AB828701	662242456	True	AB828701	Eukaryote
Rabies virus genomic RNA, complete genome, strain: rHEP5.0-delG	10015	linear	AB839169	527317319	True	AB839169	Eukaryote
Rabies virus genomic RNA, complete genome, strain: rHEP5.0-CVSG	11634	circular	AB839170	527317324	True	AB839170	Eukaryote
Bovine papillomavirus type 6 DNA, complete genome	7297	circular	AB845589	584273239	True	AB845589	Eukaryote
Hepatitis E virus DNA, complete genome, isolate: ratIDE079F	6987	linear	AB847305	575771148	True	AB847305	Eukaryote
Hepatitis E virus DNA, complete genome, isolate: ratESOLO-014SF	6983	linear	AB847306	575771152	True	AB847306	Eukaryote
Hepatitis E virus DNA, complete genome, isolate: ratELOMB-187SF	6948	linear	AB847307	575771156	True	AB847307	Eukaryote
Hepatitis E virus DNA, complete genome, isolate: ratESOLO-006SF	6965	linear	AB847308	575771160	True	AB847308	Eukaryote
Hepatitis E virus DNA, complete genome, isolate: ratIDE113F	6979	linear	AB847309	575771164	True	AB847309	Eukaryote
Human herpesvirus 4 DNA, complete genome, strain: HN1	171499	circular	AB850643	747017151	True	AB850643	Eukaryote
Human herpesvirus 4 DNA, complete genome, strain: HN2	171751	circular	AB850644	747017196	True	AB850644	Eukaryote
Human herpesvirus 4 DNA, complete genome, strain: HN10	169720	circular	AB850645	747017239	True	AB850645	Eukaryote
Human herpesvirus 4 DNA, complete genome, strain: HN11	168509	circular	AB850646	747017248	True	AB850646	Eukaryote
Human herpesvirus 4 DNA, complete genome, strain: HN12	171663	circular	AB850647	747017265	True	AB850647	Eukaryote
Human herpesvirus 4 DNA, complete genome, strain: HN3	171627	circular	AB850648	747017309	True	AB850648	Eukaryote
Human herpesvirus 4 DNA, complete genome, strain: HN4	168444	circular	AB850649	747017336	True	AB850649	Eukaryote
Human herpesvirus 4 DNA, complete genome, strain: HN13	171440	circular	AB850650	747017362	True	AB850650	Eukaryote
Human herpesvirus 4 DNA, complete genome, strain: HN14	171518	circular	AB850651	747017380	True	AB850651	Eukaryote
Human herpesvirus 4 DNA, complete genome, strain: HN5	171733	circular	AB850652	747017415	True	AB850652	Eukaryote
Human herpesvirus 4 DNA, complete genome, strain: HN6	171054	circular	AB850653	747017423	True	AB850653	Eukaryote
Human herpesvirus 4 DNA, complete genome, strain: HN15	171822	circular	AB850654	747017440	True	AB850654	Eukaryote
Human herpesvirus 4 DNA, complete genome, strain: HN7	171548	circular	AB850655	747017513	True	AB850655	Eukaryote
Human herpesvirus 4 DNA, complete genome, strain: HN16	171609	circular	AB850656	747017529	True	AB850656	Eukaryote
Human herpesvirus 4 DNA, complete genome, strain: HN8	169829	circular	AB850657	747017541	True	AB850657	Eukaryote
Human herpesvirus 4 DNA, complete genome, strain: HN17	171394	circular	AB850658	747017565	True	AB850658	Eukaryote
Human herpesvirus 4 DNA, complete genome, strain: HN9	171344	circular	AB850659	747017578	True	AB850659	Eukaryote
Human herpesvirus 4 DNA, complete genome, strain: HN18	170059	circular	AB850660	747017592	True	AB850660	Eukaryote
Hepatitis E virus genomic RNA, complete genome, isolate: HE-JA12-0725	7330	linear	AB850879	781869586	True	AB850879	Eukaryote
Newcastle disease virus viral cRNA, complete genome, strain: APMV1/chicken/Japan/Osaka/2440/1969	15192	linear	AB853926	553726963	True	AB853926	Eukaryote
Newcastle disease virus viral cRNA, complete genome, strain: APMV1/chicken/Japan/Ibaraki/SM87/1987	15192	linear	AB853928	553726975	True	AB853928	Eukaryote
Sendai virus genomic RNA, complete genome, strain: Z	15384	linear	AB855655	546225824	True	AB855655	Eukaryote
Hepatitis E virus genomic RNA, complete genome, isolate: wbJNN_13	7263	linear	AB856243	572103710	True	AB856243	Eukaryote
Cauliflower mosaic virus DNA, complete genome, isolate: IRN7	8004	circular	AB863142	591288420	True	AB863142	Eukaryote
Cauliflower mosaic virus DNA, complete genome, isolate: IRN20	8063	circular	AB863155	591288524	True	AB863155	Eukaryote
Cauliflower mosaic virus DNA, complete genome, isolate: JPNS2	8053	circular	AB863162	591288580	True	AB863162	Eukaryote
Cauliflower mosaic virus DNA, complete genome, isolate: TUR1	8021	circular	AB863166	591288612	True	AB863166	Eukaryote
Cauliflower mosaic virus DNA, complete genome, isolate: TUR50	8019	circular	AB863172	591288660	True	AB863172	Eukaryote
Cauliflower mosaic virus DNA, complete genome, isolate: TUR216	8011	circular	AB863180	591288724	True	AB863180	Eukaryote
Cauliflower mosaic virus DNA, complete genome, isolate: TUR239	8061	circular	AB863182	591288740	True	AB863182	Eukaryote
Cauliflower mosaic virus DNA, complete genome, isolate: TUR303	8007	circular	AB863190	591288804	True	AB863190	Eukaryote
Cauliflower mosaic virus DNA, complete genome, isolate: GRC92C	8030	circular	AB863201	591288892	True	AB863201	Eukaryote
Cauliflower mosaic virus DNA, complete genome, isolate: GRC92D	8034	circular	AB863202	591288900	True	AB863202	Eukaryote
Ferret hepatitis E virus genomic RNA, complete genome, strain: HEV-4351	6852	linear	AB890001	602152654	True	AB890001	Eukaryote
Hepatitis B virus DNA, complete genome, strain: 050	3227	circular	AB900096	572802401	True	AB900096	Eukaryote
Beet western yellows virus genomic RNA, nearly complete genome, strain: BWYV-Ashoro	5545	linear	AB903038	666669709	True	AB903038	Eukaryote
Hepatitis A virus genomic RNA, nearly complete genome, isolate: HAJHM-PapTok11	7195	linear	AB909123	718464980	True	AB909123	Eukaryote
Hepatitis E virus genomic RNA, nearly complete genome, isolate: JKK-Shiz13	7214	linear	AB909125	718464990	True	AB909125	Eukaryote
Simian foamy virus proviral DNA, complete genome, clone: JM356	12957	linear	AB923518	667751449	True	AB923518	Eukaryote
Persimmon virus B genomic RNA, complete genome, variant 2	18030	linear	AB923925	740529678	True	AB923925	Eukaryote
Feline morbillivirus viral cRNA, complete genome, strain: ChJP073	16004	linear	AB924122	697282681	True	AB924122	Eukaryote
Rubella virus RNA, complete genome, isolate: RVV130_vero_22w	9777	linear	AB928205	618741385	True	AB928205	Eukaryote
Hepatitis B virus DNA, complete genome, isolate: C1S_HB11-1418	3215	circular	AB931169	698040311	True	AB931169	Eukaryote
Hepatitis B virus DNA, complete genome, isolate: Os/JP/2010	3248	circular	AB933281	823630857	True	AB933281	Eukaryote
Hepatitis B virus DNA, complete genome, isolate: Os/JP/2013	3257	circular	AB933283	823630867	True	AB933283	Eukaryote
Hepatitis B virus DNA, complete genome, isolate: HB13-1204	3221	circular	AB937797	700587548	True	AB937797	Eukaryote
Hepatitis B virus DNA, complete genome, isolate: HB14-0483	3213	circular	AB937799	700587558	True	AB937799	Eukaryote
Cyclovirus ZM32 DNA, complete genome	1854	circular	AB937980	701456358	True	AB937980	Eukaryote
Cyclovirus ZM01 DNA, complete genome	1853	circular	AB937981	701456361	True	AB937981	Eukaryote
Cyclovirus ZM38 DNA, complete genome	1851	circular	AB937983	701456367	True	AB937983	Eukaryote
Cyclovirus ZM41 DNA, complete genome	1856	circular	AB937984	701456370	True	AB937984	Eukaryote
Cyclovirus ZM50a DNA, complete genome	1854	circular	AB937985	701456373	True	AB937985	Eukaryote
Cyclovirus ZM54 DNA, complete genome	1852	circular	AB937986	701456376	True	AB937986	Eukaryote
Cyclovirus ZM62 DNA, complete genome	1863	circular	AB937987	701456379	True	AB937987	Eukaryote
Chaetoceros tenuissimus DNA virus type-II DNA, complete genome, isolate: SS10-35V	5764	circular	AB971660	731180354	True	AB971660	Eukaryote
Bat polyomavirus 5b DNA, complete genome, isolate: 5b-2	5040	circular	AB972940	762229263	True	AB972940	Eukaryote
Rabies virus RNA, complete genome, strain: Lao4	11924	linear	AB981664	816197526	True	AB981664	Eukaryote
Turnip mosaic virus genomic RNA, nearly complete genome, isolate: AU1	9798	linear	AB989628	765716480	True	AB989628	Eukaryote
Turnip mosaic virus genomic RNA, nearly complete genome, isolate: AUST13	9798	linear	AB989635	765716517	True	AB989635	Eukaryote
Turnip mosaic virus genomic RNA, nearly complete genome, isolate: AUST27	9798	linear	AB989641	765716543	True	AB989641	Eukaryote
Turnip mosaic virus genomic RNA, nearly complete genome, isolate: NZ11	9798	linear	AB989644	765716558	True	AB989644	Eukaryote
Turnip mosaic virus genomic RNA, nearly complete genome, isolate: NZ402	9798	linear	AB989647	765716570	True	AB989647	Eukaryote
Turnip mosaic virus genomic RNA, nearly complete genome, isolate: NZW4	9798	linear	AB989655	765716615	True	AB989655	Eukaryote
Turnip mosaic virus genomic RNA, nearly complete genome, isolate: NZ415	9796	linear	AB989659	765716643	True	AB989659	Eukaryote
Human adenovirus D, complete genome	35100	linear	AC_000006	56160472	True	AC_000006	Eukaryote
Human adenovirus 5, complete genome	35938	linear	AC_000008	56160529	True	AC_000008	Eukaryote
Simian adenovirus 21, complete genome	35524	linear	AC_000010	56160595	True	AC_000010	Eukaryote
Simian adenovirus 25, complete genome	36519	linear	AC_000011	56160634	True	AC_000011	Eukaryote
Human adenovirus type 1, complete genome	36001	linear	AC_000017	56160839	True	AC_000017	Eukaryote
Human adenovirus type 7, complete genome	35514	linear	AC_000018	56160876	True	AC_000018	Eukaryote
Canine adenovirus type 2, complete genome	31323	linear	AC_000020	56160952	True	AC_000020	Eukaryote
Porcine adenovirus 3, complete genome	34094	linear	AC_000189	564102868	True	AC_000189	Eukaryote
Tree shrew adenovirus 1, complete genome	33501	linear	AC_000190	564105783	True	AC_000190	Eukaryote
Bovine adenovirus A, complete genome	34185	linear	AC_000191	564619457	True	AC_000191	Eukaryote
Murine hepatitis virus strain JHM, complete genome	31526	linear	AC_000192	568319712	True	AC_000192	Eukaryote
Citrus tristeza virus, complete genome	19249	linear	AF001623	2098825	True	AF001623	Eukaryote
JC virus variant GS/K, complete genome	5120	circular	AF004349	2246606	True	AF004349	Eukaryote
HIV-1 isolate Q23-17 from Kenya, complete genome	9160	linear	AF004885	2745742	True	AF004885	Eukaryote
HIV-1 isolate 93br020 from Brazil complete genome	8968	linear	AF005494	3114544	True	AF005494	Eukaryote
HIV-1 isolate 93br029 from Brazil complete genome	8954	linear	AF005495	3114554	True	AF005495	Eukaryote
HIV-1 isolate 90CR056 from Central African Republic, complete genome	8953	linear	AF005496	3114562	True	AF005496	Eukaryote
Maize streak virus - [Set], complete genome	2701	circular	AF007881	2266887	True	AF007881	Eukaryote
Common chimpanzee papillomavirus 1, complete genome	7889	linear	AF020905	2454637	True	AF020905	Eukaryote
Hepatitis GB virus A complete genome	9586	linear	AF023424	2828597	True	AF023424	Eukaryote
Hepatitis GB virus A complete genome	9625	linear	AF023425	2828599	True	AF023425	Eukaryote
Foot-and-mouth disease virus O strain Chu-Pei complete genome	7733	linear	AF026168	5921457	True	AF026168	Eukaryote
Adeno-associated virus 3B, complete genome	4722	linear	AF028705	2766608	True	AF028705	Eukaryote
JC virus strain Tokyo-1, complete genome	5128	circular	AF030085	3098269	True	AF030085	Eukaryote
Human spumaretrovirus, complete genome	5340	linear	AF033816	2801484	True	AF033816	Eukaryote
Turnip yellow mosaic Blue Lake isolate, complete genome	6319	linear	AF035403	2723934	True	AF035403	Eukaryote
Ryegrass mosaic virus strain RGMV-AV, complete genome	9542	linear	AF035818	3282653	True	AF035818	Eukaryote
Simian-Human immunodeficiency virus strain SHIV-89.6, complete genome	10000	linear	AF038398	2828036	True	AF038398	Eukaryote
Sugarcane streak Egypt virus - [Man], complete genome	2704	circular	AF039530	4056579	True	AF039530	Eukaryote
Simian-Human immunodeficiency virus clone SHIV-HXBc2P 3.2, complete genome	10006	linear	AF041850	2895564	True	AF041850	Eukaryote
HIV-1 isolate MBC200 from Australia, complete genome	9767	linear	AF042100	3002829	True	AF042100	Eukaryote
HIV-1 isolate MBC925 from Australia, complete genome	9739	linear	AF042101	3002839	True	AF042101	Eukaryote
HIV-1 isolate C18 clone MBCC18B from Australia, complete genome	8540	linear	AF042102	3002849	True	AF042102	Eukaryote
HIV-1 isolate MBCC54 from Australia, complete genome	8709	linear	AF042103	3002858	True	AF042103	Eukaryote
HIV-1 isolate MBCC98 from Australia, complete genome	8733	linear	AF042104	3002867	True	AF042104	Eukaryote
HIV-1 isolate MBCD36 from Australia, complete genome	8669	linear	AF042105	3002876	True	AF042105	Eukaryote
HIV-1 isolate C18 clone PC18RO1 from Australia, complete genome	9096	linear	AF042106	3002885	True	AF042106	Eukaryote
HIV-1 CRF04_cpx clone 94CY032-3 from Cyprus, complete genome	9050	linear	AF049337	3947925	True	AF049337	Eukaryote
HIV-1 chimpanzee C499, isolate HIV-1JC, clone HIV-1JC16, from the USA, complete genome	9193	linear	AF049494	3098572	True	AF049494	Eukaryote
HIV-1 chimpanzee C455, isolate HIV-1NC, clone HIV-1NC7, from the USA, complete genome	9196	linear	AF049495	3098582	True	AF049495	Eukaryote
Hepatitis E virus strain TK15/92, complete genome	7199	linear	AF051830	4033730	True	AF051830	Eukaryote
Rous sarcoma virus strain Schmidt-Ruppin B, complete genome	9396	linear	AF052428	3003000	True	AF052428	Eukaryote
Mus dunni endogenous virus complete genome	8655	linear	AF053745	3309122	True	AF053745	Eukaryote
Hepatitis C virus subtype 1b strain HC-J4, complete genome	9580	linear	AF054250	3098638	True	AF054250	Eukaryote
Echovirus 23 strain CT86-6760, complete genome	7352	linear	AF055846	3928983	True	AF055846	Eukaryote
Southern bean mosaic virus strain SBMV-S, complete genome	4136	linear	AF055888	3126831	True	AF055888	Eukaryote
HIV-1 isolate HH8793 clone 12.1 from Finland, complete genome	9047	linear	AF061641	3403216	True	AF061641	Eukaryote
HIV-1 isolate SE6165 from Sweden, complete genome	9074	linear	AF061642	3403225	True	AF061642	Eukaryote
Beet soil-borne mosaic virus RNA2, complete genome	4616	linear	AF061869	3136264	True	AF061869	Eukaryote
HIV-1 isolate DJ263 from Djibouti, complete genome	9002	linear	AF063223	3132800	True	AF063223	Eukaryote
HIV-1 isolate DJ264 from Djibouti, complete genome	8961	linear	AF063224	3132810	True	AF063224	Eukaryote
HIV-1 isolate BFP90 from Burkina Faso, complete genome	9775	linear	AF064699	3779261	True	AF064699	Eukaryote
HIV-1 isolate 301999 from India, complete genome	9067	linear	AF067154	3252918	True	AF067154	Eukaryote
HIV-1 isolate 21068 from India, complete genome	9002	linear	AF067155	3252927	True	AF067155	Eukaryote
HIV-1 isolate 21301 from India, complete genome	8981	linear	AF067156	3252936	True	AF067156	Eukaryote
HIV-1 isolate 301905 from India, complete genome	8951	linear	AF067158	3252956	True	AF067158	Eukaryote
HIV-1 isolate 11246 from India, complete genome	8955	linear	AF067159	3252966	True	AF067159	Eukaryote
HIV-1 isolate DH12 clone 3 from the USA, complete genome	9704	linear	AF069140	3193272	True	AF069140	Eukaryote
HIV-1 isolate SE7535 from Uganda, complete genome	8859	linear	AF069671	3808260	True	AF069671	Eukaryote
GB virus C variant troglodytes, complete genome	9250	linear	AF070476	4883488	True	AF070476	Eukaryote
HIV-1 E9 from the USA, complete genome	9699	linear	AF070521	3378121	True	AF070521	Eukaryote
Human T-cell lymphotropic virus type 2 isolate G2 from Venezuela, complete genome	8893	linear	AF074965	5106404	True	AF074965	Eukaryote
Venezuelan equine encephalitis virus strain Everglades Fe3-7c, complete genome	11395	linear	AF075251	4262299	True	AF075251	Eukaryote
Venezuelan equine encephalitis virus strain Mucambo BeAn 8, complete genome	11391	linear	AF075253	4262305	True	AF075253	Eukaryote
Venezuelan equine encephalitis virus strain Tonate CaAn 410d, complete genome	11530	linear	AF075254	4262308	True	AF075254	Eukaryote
Venezuelan equine encephalitis virus strain 71D-1252, complete genome	11311	linear	AF075255	4262311	True	AF075255	Eukaryote
Venezuelan equine encephalitis virus strain Pixuna BeAr 35645, complete genome	11344	linear	AF075256	4262314	True	AF075256	Eukaryote
Venezuelan equine encephalitis virus strain 78V-3531, complete genome	11465	linear	AF075257	4262317	True	AF075257	Eukaryote
Venezuelan equine encephalitis virus strain AG80-663, complete genome	11494	linear	AF075258	4262320	True	AF075258	Eukaryote
Venezuelan equine encephalitis virus strain Cabassou CaAr 508, complete genome	11385	linear	AF075259	4262323	True	AF075259	Eukaryote
Simian immunodeficiency virus strain SIVlhoest, complete genome	9957	linear	AF075269	3342102	True	AF075269	Eukaryote
HIV-1 isolate SE6954 from Uganda, complete genome	8879	linear	AF075701	5668880	True	AF075701	Eukaryote
HIV-1 isolate SE8603 from Uganda, complete genome	8955	linear	AF075702	5305477	True	AF075702	Eukaryote
HIV-1 isolate FIN9363 subtype F1 from Finland, complete genome	8925	linear	AF075703	6090965	True	AF075703	Eukaryote
HIV-1 isolate MN clone MNTQ from the USA, complete genome	9493	linear	AF075719	3511259	True	AF075719	Eukaryote
Hepatitis E virus from Hyderabad, India, complete genome	7194	linear	AF076239	12711849	True	AF076239	Eukaryote
Rice tungro bacilliform virus Serdang strain, complete genome	8016	circular	AF076470	3342813	True	AF076470	Eukaryote
HIV-1 isolate VI354 from Gabon, complete genome	8929	linear	AF076474	5668910	True	AF076474	Eukaryote
HIV-1 isolate VI1126 from Democratic Republic of the Congo, complete genome	8994	linear	AF076475	5668922	True	AF076475	Eukaryote
HIV-1 isolate VI961 from Democratic Republic of the Congo, complete genome	8990	linear	AF076998	5668954	True	AF076998	Eukaryote
Simian immunodeficiency virus isolate smmPGm clone PGm5.3, complete genome	10184	linear	AF077017	3462587	True	AF077017	Eukaryote
HIV-1 isolate VI850 from Democratic Republic of the Congo, complete genome	8903	linear	AF077336	5668938	True	AF077336	Eukaryote
Igbo Ora virus strain IBH10964, complete genome	11821	linear	AF079457	3396058	True	AF079457	Eukaryote
Coxsackievirus B2 strain Ohio, complete genome	7403	linear	AF081485	5669020	True	AF081485	Eukaryote
Hepatitis G virus strain HGV-Iw isolate pHGVqz, complete genome	9373	linear	AF081782	4093140	True	AF081782	Eukaryote
Cryphonectria hypovirus 1 isolate Euro7, complete genome	12727	linear	AF082191	4249645	True	AF082191	Eukaryote
HIV-2 isolate ALI from Guinea-Bissau, complete genome	10353	linear	AF082339	4007991	True	AF082339	Eukaryote
Echovirus 5, complete genome	7433	linear	AF083069	4378011	True	AF083069	Eukaryote
Macaca mulatta rhadinovirus 17577, complete genome	133719	linear	AF083501	8714565	True	AF083501	Eukaryote
Tomato leaf curl virus-[Solanum species D1] strain D1, complete genome	2766	linear	AF084006	4191337	True	AF084006	Eukaryote
Tomato leaf curl virus-[Solanum species D2] strain D2, complete genome	2767	linear	AF084007	4191338	True	AF084007	Eukaryote
HIV-1 subtype G from Democratic Republic of the Congo, complete genome	9707	linear	AF084936	4262336	True	AF084936	Eukaryote
HIV-1 strain LM49 isolate TWCYS from Taiwan, complete genome	9694	linear	AF086817	3694861	True	AF086817	Eukaryote
Hepatitis B virus strain G5.27295, complete genome	3221	circular	AF090842	5114084	True	AF090842	Eukaryote
Bovine viral diarrhea virus strain Oregon C24V, complete genome	12310	linear	AF091605	3661565	True	AF091605	Eukaryote
VESV-like calicivirus strain Pan-1, complete genome	8304	linear	AF091736	3661574	True	AF091736	Eukaryote
Norwalk virus, complete genome	7598	linear	AF093797	3769664	True	AF093797	Eukaryote
Yellow fever virus strain Trinidad 79A isolate 788379, complete genome	10760	linear	AF094612	3851161	True	AF094612	Eukaryote
Vaccinia virus (strain Tian Tan) complete genome	189274	linear	AF095689	6969640	True	AF095689	Eukaryote
Norovirus Bo/Newbury2/1976/UK, complete genome	7311	linear	AF097917	109254934	True	AF097917	Eukaryote
Venezuelan equine encephalitis virus strain ZPC738, complete genome	11421	linear	AF100566	4689187	True	AF100566	Eukaryote
Simian immunodeficiency virus strain US, complete genome	9788	linear	AF103818	4336706	True	AF103818	Eukaryote
HIV-1 isolate SE7812 from Sweden, complete genome	9063	linear	AF107770	5733940	True	AF107770	Eukaryote
HIV-1 isolate SE8131 from Sweden, complete genome	9016	linear	AF107771	5733950	True	AF107771	Eukaryote
Feline calicivirus strain F65 complete genome	7681	linear	AF109465	5706691	True	AF109465	Eukaryote
HIV-1 isolate C-96BW01B21 country Botswana, complete genome	8999	linear	AF110960	4324716	True	AF110960	Eukaryote
HIV-1 isolate C-96BW01B22 country Botswana, complete genome	9000	linear	AF110961	4324717	True	AF110961	Eukaryote
HIV-1 isolate C-96BW04.08 country Botswana, complete genome	9036	linear	AF110964	4324720	True	AF110964	Eukaryote
HIV-1 isolate C-96BW04.09 country Botswana, complete genome	9007	linear	AF110965	4324721	True	AF110965	Eukaryote
HIV-1 isolate C-96BW04.10 country Botswana, complete genome	9081	linear	AF110966	4324722	True	AF110966	Eukaryote
HIV-1 isolate C-96BW05.04 country Botswana, complete genome	9056	linear	AF110968	4324724	True	AF110968	Eukaryote
HIV-1 isolate C-96BW11.04 country Botswana, complete genome	8897	linear	AF110969	4324725	True	AF110969	Eukaryote
HIV-1 isolate C-96BW11B01 country Botswana, complete genome	8908	linear	AF110971	4324727	True	AF110971	Eukaryote
HIV-1 isolate C-96BW12.10 country Botswana, complete genome	8911	linear	AF110972	4324728	True	AF110972	Eukaryote
HIV-1 isolate C-96BW15C05 country Botswana, complete genome	9010	linear	AF110975	4324731	True	AF110975	Eukaryote
HIV-1 isolate C-96BW16.26 country Botswana, complete genome	8963	linear	AF110978	4324734	True	AF110978	Eukaryote
HIV-1 isolate C-96BW17B05 country Botswana, complete genome	8930	linear	AF110981	4324737	True	AF110981	Eukaryote
Human poliovirus 1 isolate CHN-Guangdong/92-2, complete genome	7444	linear	AF111961	36973614	True	AF111961	Eukaryote
Human poliovirus 1 isolate CHN-Hainan/93-2, complete genome	7444	linear	AF111966	36973616	True	AF111966	Eukaryote
Human poliovirus 1 isolate CHN-Fujian/93-8, complete genome	7444	linear	AF111981	36973618	True	AF111981	Eukaryote
Human poliovirus 1 isolate CHN-Yunnan/92, complete genome	7444	linear	AF111982	36973620	True	AF111982	Eukaryote
Human poliovirus 1 isolate CHN-Henan/91-3, complete genome	7444	linear	AF111983	38492165	True	AF111983	Eukaryote
Human poliovirus 1 isolate CHN-Jiangxi/89-1, complete genome	7443	linear	AF111984	47558937	True	AF111984	Eukaryote
Rice tungro bacilliform virus strain RTBV-G1, complete genome	8006	circular	AF113830	4826591	True	AF113830	Eukaryote
Rice tungro bacilliform virus strain RTBV-G2, complete genome	8001	circular	AF113831	4826596	True	AF113831	Eukaryote
Rice tungro bacilliform virus strain RTBV-Ic, complete genome	8005	circular	AF113832	4826601	True	AF113832	Eukaryote
Coxsackievirus B5 strain Faulkner, complete genome	7400	linear	AF114383	6650682	True	AF114383	Eukaryote
Simian immunodeficiency virus strain SIVcpz, complete genome	9170	linear	AF115393	6594657	True	AF115393	Eukaryote
HIV-1 strain GR84 complete genome	9699	linear	AF119819	5059040	True	AF119819	Eukaryote
HIV-1 strain GR11 complete genome	9548	linear	AF119820	5059050	True	AF119820	Eukaryote
Hepatitis G virus strain Iowan, complete genome	9395	linear	AF121950	4884678	True	AF121950	Eukaryote
TT virus isolate GH1, complete genome	3852	circular	AF122913	4574801	True	AF122913	Eukaryote
TT virus isolate JA20, complete genome	3853	circular	AF122914	5597008	True	AF122914	Eukaryote
TT virus isolate JA4, complete genome	3537	circular	AF122917	5616144	True	AF122917	Eukaryote
TT virus isolate US35, complete genome	3839	circular	AF122920	5616158	True	AF122920	Eukaryote
TT virus isolate US32, complete genome	3839	circular	AF122921	5616162	True	AF122921	Eukaryote
Bovine enterovirus isolate K2577, complete genome	7405	linear	AF123432	6179876	True	AF123432	Eukaryote
Bovine enterovirus isolate SL305, complete genome	7410	linear	AF123433	6179878	True	AF123433	Eukaryote
Simian retrovirus SRV-2 strain D2/RHE/OR/V1, complete genome	8105	linear	AF126468	5442108	True	AF126468	Eukaryote
TT virus TTVCHN2, complete genome	3739	linear	AF129887	4406542	True	AF129887	Eukaryote
Simian immunodeficiency virus complete genome	10006	linear	AF131870	5106562	True	AF131870	Eukaryote
Human papillomavirus candHPV85, complete genome	7812	circular	AF131950	4574720	True	AF131950	Eukaryote
HIV-1 isolate MB2059 from Kenya, complete genome	10035	linear	AF133821	5805260	True	AF133821	Eukaryote
Hepatitis C virus subtype 1b strain HCV-N, complete genome	9616	linear	AF139594	23957856	True	AF139594	Eukaryote
Hepatitis B virus clone 7720-G8, complete genome	3161	circular	AF143298	5019931	True	AF143298	Eukaryote
Hepatitis B virus clone 7744-G9, complete genome	3033	circular	AF143299	5019937	True	AF143299	Eukaryote
Hepatitis B virus clone 7832-G4, complete genome	3058	circular	AF143300	5019943	True	AF143300	Eukaryote
Hepatitis B virus clone HD1406, complete genome	3136	circular	AF143303	5019958	True	AF143303	Eukaryote
Hepatitis B virus clone HD319, complete genome	3126	circular	AF143304	5019963	True	AF143304	Eukaryote
Hepatitis B virus clone RM501, complete genome	3100	circular	AF143305	5019968	True	AF143305	Eukaryote
Hepatitis B virus clone RM517, complete genome	3137	circular	AF143306	5019974	True	AF143306	Eukaryote
Hepatitis B virus clone RM518, complete genome	2952	circular	AF143307	5019979	True	AF143307	Eukaryote
Hepatitis B virus clone WB1254, complete genome	3046	circular	AF143308	5019984	True	AF143308	Eukaryote
Pestivirus reindeer-1 V60-Krefeld complete genome	12318	linear	AF144618	15282443	True	AF144618	Eukaryote
Gallid herpesvirus 2, complete genome	174077	linear	AF147806	49349068	True	AF147806	Eukaryote
Human papillomavirus type 83, complete genome	8104	linear	AF151983	5059324	True	AF151983	Eukaryote
Hepatitis C virus subtype 1b strain MD2-2, complete genome	9379	linear	AF165048	5918934	True	AF165048	Eukaryote
Hepatitis C virus subtype 1b strain MD3-2, complete genome	9379	linear	AF165050	5918938	True	AF165050	Eukaryote
Hepatitis C virus subtype 1b strain MD4-2, complete genome	9379	linear	AF165052	5918942	True	AF165052	Eukaryote
Hepatitis C virus subtype 1b strain MD5-2, complete genome	9369	linear	AF165054	5918946	True	AF165054	Eukaryote
Hepatitis C virus subtype 1b strain MD6-2, complete genome	9386	linear	AF165056	5918950	True	AF165056	Eukaryote
Hepatitis C virus subtype 1b strain MD7-2, complete genome	9379	linear	AF165058	5918954	True	AF165058	Eukaryote
Hepatitis C virus subtype 1b strain MD9-2, complete genome	9379	linear	AF165062	5918962	True	AF165062	Eukaryote
Hepatitis C virus subtype 1b strain MD10-2, complete genome	9379	linear	AF165064	5918966	True	AF165064	Eukaryote
Tomato leaf curl geminivirus DNA-A strain LCV-Ban4, complete genome	2759	circular	AF165098	5764401	True	AF165098	Eukaryote
Bacteriophage D3, complete genome	56426	linear	AF165214	291464450	True	AF165214	Eukaryote
Hepatitis C virus subtype 2a isolate NDM228, complete genome	9661	linear	AF169002	6707279	True	AF169002	Eukaryote
Hepatitis C virus subtype 2a isolate G2aK1, complete genome	9693	linear	AF169003	6707281	True	AF169003	Eukaryote
Hepatitis C virus subtype 2a isolate G2aK3, complete genome	9653	linear	AF169004	6707283	True	AF169004	Eukaryote
Hepatitis C virus subtype 2a isolate NDM59, complete genome	9700	linear	AF169005	6707285	True	AF169005	Eukaryote
Porcine reproductive and respiratory syndrome virus isolate PA8 complete genome	15483	linear	AF176348	22658020	True	AF176348	Eukaryote
Hepatitis C virus subtype 1b strain 274933RU, complete genome	9600	linear	AF176573	5738246	True	AF176573	Eukaryote
HIV-1 strain GR17 from Greece complete genome	8935	linear	AF179368	8886632	True	AF179368	Eukaryote
HIV-1 G829 from Ghana complete genome	8725	linear	AF184155	6466838	True	AF184155	Eukaryote
Porcine reproductive and respiratory syndrome virus strain SP, complete genome	15520	linear	AF184212	7650192	True	AF184212	Eukaryote
HIV-1 isolate 98BW21.17, from Botswania, complete genome	9103	linear	AF192135	6643025	True	AF192135	Eukaryote
HIV-1 isolate RU98001 from Russia, complete genome	8961	linear	AF193277	6651466	True	AF193277	Eukaryote
HIV-1 isolate 93TH065 from Thailand, complete genome	9612	linear	AF197339	6690751	True	AF197339	Eukaryote
HIV-1 isolate 90CF11697 from Central African Republic, complete genome	9628	linear	AF197340	6690752	True	AF197340	Eukaryote
HIV-1 isolate 90CF4071 from Central African Republic, complete genome	9597	linear	AF197341	6690753	True	AF197341	Eukaryote
Murine hepatitis virus strain 2, complete genome	31276	linear	AF201929	6625759	True	AF201929	Eukaryote
Hepatitis C virus subtype 1b strain MD11, complete genome	9375	linear	AF207752	7650221	True	AF207752	Eukaryote
Hepatitis C virus subtype 1b strain MD12, complete genome	9374	linear	AF207753	7650223	True	AF207753	Eukaryote
Hepatitis C virus subtype 1b strain MD13, complete genome	9375	linear	AF207754	7650225	True	AF207754	Eukaryote
Hepatitis C virus subtype 1b strain MD14, complete genome	9379	linear	AF207755	7650227	True	AF207755	Eukaryote
Hepatitis C virus subtype 1b strain MD15, complete genome	9377	linear	AF207756	7650229	True	AF207756	Eukaryote
Hepatitis C virus subtype 1b strain MD16, complete genome	9375	linear	AF207757	7650231	True	AF207757	Eukaryote
Hepatitis C virus subtype 1b strain MD17, complete genome	9379	linear	AF207758	7650233	True	AF207758	Eukaryote
Hepatitis C virus subtype 1b strain MD18, complete genome	9388	linear	AF207759	7650235	True	AF207759	Eukaryote
Hepatitis C virus subtype 1b strain MD19, complete genome	9379	linear	AF207760	7650237	True	AF207760	Eukaryote
Hepatitis C virus subtype 1b strain MD20, complete genome	9379	linear	AF207761	7650239	True	AF207761	Eukaryote
Hepatitis C virus subtype 1b strain MD22, complete genome	9377	linear	AF207763	7650243	True	AF207763	Eukaryote
Hepatitis C virus subtype 1b strain MD23, complete genome	9368	linear	AF207764	7650245	True	AF207764	Eukaryote
Hepatitis C virus subtype 1b strain MD24, complete genome	9379	linear	AF207765	7650247	True	AF207765	Eukaryote
Hepatitis C virus subtype 1b strain MD25, complete genome	9379	linear	AF207766	7650249	True	AF207766	Eukaryote
Hepatitis C virus subtype 1b strain MD26, complete genome	9379	linear	AF207767	7650251	True	AF207767	Eukaryote
Hepatitis C virus subtype 1b strain MD27, complete genome	9379	linear	AF207768	7650253	True	AF207768	Eukaryote
Hepatitis C virus subtype 1b strain MD28, complete genome	9379	linear	AF207769	7650255	True	AF207769	Eukaryote
Hepatitis C virus subtype 1b strain MD29, complete genome	9379	linear	AF207770	7650257	True	AF207770	Eukaryote
Hepatitis C virus subtype 1b strain MD30, complete genome	9379	linear	AF207771	7650259	True	AF207771	Eukaryote
Hepatitis C virus subtype 1b strain MD31, complete genome	9379	linear	AF207772	7650261	True	AF207772	Eukaryote
Hepatitis C virus subtype 1b strain MD32, complete genome	9379	linear	AF207773	7650263	True	AF207773	Eukaryote
Hepatitis C virus subtype 1b strain MD33, complete genome	9379	linear	AF207774	7650265	True	AF207774	Eukaryote
Hepatitis C virus subtype 1b strain MD34, complete genome	9373	linear	AF208024	7341102	True	AF208024	Eukaryote
Murine hepatitis virus strain Penn 97-1, complete genome	31112	linear	AF208066	7769340	True	AF208066	Eukaryote
Murine hepatitis virus strain ML-10, complete genome	31233	linear	AF208067	7769351	True	AF208067	Eukaryote
Japanese encephalitis virus FU strain, complete genome	10964	linear	AF217620	8163805	True	AF217620	Eukaryote
Bovine viral diarrhea virus-1, complete genome	12294	linear	AF220247	9836967	True	AF220247	Eukaryote
Rice tungro bacilliform virus Chainat isolate, complete genome	8010	circular	AF220561	18026839	True	AF220561	Eukaryote
DG-75 Murine leukemia virus, complete genome	8207	linear	AF221065	11078528	True	AF221065	Eukaryote
HIV-1 strain HIV-1wk from South Korea, complete genome	9238	linear	AF224507	7021454	True	AF224507	Eukaryote
Enterovirus Yanbian 96-83csf, complete genome	7456	linear	AF230973	8745391	True	AF230973	Eukaryote
Hepatitis B virus strain adw2 isolate HBV334, complete genome	3068	circular	AF233236	9082083	True	AF233236	Eukaryote
Potato virus Y strain nnp, complete genome	9699	linear	AF237963	56462531	True	AF237963	Eukaryote
Hepatitis C virus subtype 2a strain MD2a-1, complete genome	9416	linear	AF238481	7329200	True	AF238481	Eukaryote
Hepatitis C virus subtype 2a strain MD2a-2, complete genome	9416	linear	AF238482	7329202	True	AF238482	Eukaryote
Hepatitis C virus subtype 2a strain MD2a-4, complete genome	9416	linear	AF238483	7329204	True	AF238483	Eukaryote
Hepatitis C virus subtype 2a strain MD2a-5, complete genome	9416	linear	AF238484	7329206	True	AF238484	Eukaryote
Hepatitis C virus subtype 2a strain MD2a-7, complete genome	9416	linear	AF238485	7329208	True	AF238485	Eukaryote
Hepatitis C virus subtype 2b strain MD2b-1, complete genome	9416	linear	AF238486	7329210	True	AF238486	Eukaryote
Sugarcane streak Egypt virus - [Naga], complete genome	2706	linear	AF239159	8748962	True	AF239159	Eukaryote
Maize streak virus - B[Vaalhart wheat], complete genome	2682	linear	AF239960	9719344	True	AF239960	Eukaryote
Maize streak virus - A[Vaalhart maize], complete genome	2690	linear	AF239961	9719349	True	AF239961	Eukaryote
Maize streak virus - B[Tas], complete genome	2683	linear	AF239962	9719354	True	AF239962	Eukaryote
Enterovirus CA55-1988, complete genome	7411	linear	AF241359	13128902	True	AF241359	Eukaryote
Hepatitis B virus isolate CHIMP_4, complete genome	3182	circular	AF242586	9454170	True	AF242586	Eukaryote
TT virus isolate TUPB, complete genome	3817	circular	AF247137	9049775	True	AF247137	Eukaryote
TT virus isolate T3PB, complete genome	3838	circular	AF247138	9049776	True	AF247138	Eukaryote
Bovine leukemia virus, complete genome	8588	linear	AF257515	9739119	True	AF257515	Eukaryote
Human astrovirus type 8, complete genome	6759	linear	AF260508	9230736	True	AF260508	Eukaryote
Swine vesicular disease virus strain NET/1/92, complete genome	7406	linear	AF268065	8896132	True	AF268065	Eukaryote
Potato virus X strain Taiwan, complete genome	6451	linear	AF272736	73746007	True	AF272736	Eukaryote
Wheat streak mosaic virus strain El Batan 3 complete genome	9339	linear	AF285170	11066855	True	AF285170	Eukaryote
HIV-1 strain 94IN476 from India, complete genome	8990	linear	AF286223	13569207	True	AF286223	Eukaryote
HIV-1 strain 96ZM651 from Zambia, complete genome	9009	linear	AF286224	13569217	True	AF286224	Eukaryote
HIV-1 strain 96ZM751 from Zambia, complete genome	8972	linear	AF286225	13569227	True	AF286225	Eukaryote
HIV-1 strain 97ZA012 from South Africa, complete genome	8958	linear	AF286227	13569247	True	AF286227	Eukaryote
HIV-1 strain 98BR004 from Brazil, complete genome	9016	linear	AF286228	13569257	True	AF286228	Eukaryote
HIV-1 strain 98IN012 from India, complete genome	8995	linear	AF286231	13569287	True	AF286231	Eukaryote
HIV-1 strain 98IN022 from India, complete genome	8983	linear	AF286232	13569297	True	AF286232	Eukaryote
HIV-1 strain 98IS002 from Israel, complete genome	8986	linear	AF286233	13569307	True	AF286233	Eukaryote
HIV-1 strain 98TZ013 from Tanzania, complete genome	9034	linear	AF286234	13569317	True	AF286234	Eukaryote
HIV-1 strain 98TZ017 from Tanzania, complete genome	9012	linear	AF286235	13569327	True	AF286235	Eukaryote
HIV-1 isolate 83CD003 from Republic of the Congo, complete genome	9060	linear	AF286236	14530226	True	AF286236	Eukaryote
HIV-1 isolate 94CY017.41 from Cyprus, complete genome	9060	linear	AF286237	14530236	True	AF286237	Eukaryote
HIV-1 isolate 97CDKTB48 from Republic of the Congo, complete genome	8972	linear	AF286238	14530245	True	AF286238	Eukaryote
HIV-1 isolate 97KR004 from South Korea, complete genome	9064	linear	AF286239	14530254	True	AF286239	Eukaryote
HIV-1 isolate WR27 from USA, complete genome	9719	linear	AF286365	11095910	True	AF286365	Eukaryote
HIV-1 clone 96TZ-BF061 from Tanzania, complete genome	8976	linear	AF289548	13540161	True	AF289548	Eukaryote
HIV-1 clone 96TZ-BF071 from Tanzania, complete genome	9023	linear	AF289549	13540171	True	AF289549	Eukaryote
HIV-1 clone 96TZ-BF110 from Tanzania, complete genome	8992	linear	AF289550	13540181	True	AF289550	Eukaryote
HIV-1 clone C.96BW06.J7 from Botswana, complete genome	9713	linear	AF290029	11321015	True	AF290029	Eukaryote
HIV-1 clone C.96BW06.K18 from Botswana, complete genome	9757	linear	AF290030	11321025	True	AF290030	Eukaryote
Human papillomavirus type 84, complete genome	7948	linear	AF293960	12958167	True	AF293960	Eukaryote
Human papillomavirus type 82 subtype IS39/AE2, complete genome	7904	linear	AF293961	13507120	True	AF293961	Eukaryote
Hepatitis B virus isolate 80, complete genome	3200	circular	AF297624	15419852	True	AF297624	Eukaryote
TT virus Polish isolate P/1C1, complete genome	3756	circular	AF298585	10304415	True	AF298585	Eukaryote
Simian immunodeficiency virus virus strain SIVcolCGU1, complete genome	8728	linear	AF301156	12657808	True	AF301156	Eukaryote
Beak and feather disease virus natural-host Trichoglossus haematodus, complete genome	2007	circular	AF311299	11119212	True	AF311299	Eukaryote
Beak and feather disease virus natural-host Cacatua galerita, complete genome	1994	circular	AF311301	11119220	True	AF311301	Eukaryote
Beak and feather disease virus natural-host Cacatua galerita, complete genome	1993	circular	AF311302	11119224	True	AF311302	Eukaryote
Human echovirus 30 strain Bastianni, complete genome	7445	linear	AF311938	17224872	True	AF311938	Eukaryote
Human coxsackievirus B4 strain E2 variant, complete genome	7397	linear	AF311939	17224874	True	AF311939	Eukaryote
HIV-1 isolate 97CDKP58e from Republic of the Congo, complete genome	8843	linear	AF316544	14530262	True	AF316544	Eukaryote
HIV-1 clone MJ4 from Botswana, complete genome	9913	linear	AF321523	13172878	True	AF321523	Eukaryote
Caprine arthritis-encephalitis virus 1GA, complete genome	8919	linear	AF322109	12082827	True	AF322109	Eukaryote
Baboon enterovirus strain A13, complete genome	7389	linear	AF326750	167987224	True	AF326750	Eukaryote
Simian agent 5 strain B165, complete genome	7378	linear	AF326751	167987226	True	AF326751	Eukaryote
Simian enterovirus SV19 strain M19s (P2), complete genome	7373	linear	AF326754	167987228	True	AF326754	Eukaryote
Simian enterovirus SV4 strain 1715 UWB, complete genome	7295	linear	AF326759	167987230	True	AF326759	Eukaryote
Simian enterovirus SV43 strain OM112t (P12), complete genome	7348	linear	AF326761	167987232	True	AF326761	Eukaryote
Simian enterovirus 46 strain OM22 (P15), complete genome	7393	linear	AF326764	167987234	True	AF326764	Eukaryote
Equine infectious anemia virus strain Liaoning, complete genome	8235	linear	AF327877	13383729	True	AF327877	Eukaryote
Simian immunodeficiency virus strain SIVmnd14cg, complete genome	9529	linear	AF328295	15055096	True	AF328295	Eukaryote
Maize streak virus - [Raw], complete genome	2690	circular	AF329889	14794718	True	AF329889	Eukaryote
HIV-1 isolate A027 from Argentina, complete genome	9108	linear	AF332867	15787958	True	AF332867	Eukaryote
Simian immunodeficiency virus strain SIVsmSL92b, complete genome	9613	linear	AF334679	14164886	True	AF334679	Eukaryote
Simian virus 40 strain GM00637H defective variant 12, complete genome	4669	linear	AF345345	13517913	True	AF345345	Eukaryote
Tamana bat virus, complete genome	10428	linear	AF346759	33340967	True	AF346759	Eukaryote
Human papillomavirus type 86 candidate, complete genome	7983	linear	AF349909	15741127	True	AF349909	Eukaryote
Beet chlorosis virus isolate BChV-CR, complete genome	5742	linear	AF352025	13936833	True	AF352025	Eukaryote
Hepatitis C virus subtype 1b isolate HCV-S1, complete genome	9609	linear	AF356827	15487693	True	AF356827	Eukaryote
Equine rhinovirus 3 strain P313/75, complete genome	8821	linear	AF361253	15192761	True	AF361253	Eukaryote
Hepatitis B virus strain G683-2, complete genome	3182	circular	AF363962	13991868	True	AF363962	Eukaryote
Hepatitis B virus strain G683-3, complete genome	3213	circular	AF363963	13991873	True	AF363963	Eukaryote
White spot syndrome virus, complete genome	292967	circular	AF369029	58866698	True	AF369029	Eukaryote
Human metapneumovirus isolate 00-1, complete genome	13350	linear	AF371337	20150834	True	AF371337	Eukaryote
Foot-and-mouth disease virus O/SKR/2000, complete genome	7813	linear	AF377945	15216732	True	AF377945	Eukaryote
Simian immunodeficiency virus isolate SIVcpzGAB2 complete genome	9354	linear	AF382828	21105228	True	AF382828	Eukaryote
Simian immunodeficiency virus isolate SIVrcmGAB1, complete genome	9465	linear	AF382829	21105238	True	AF382829	Eukaryote
Hepatitis B virus isolate G376-A6, complete genome	3125	circular	AF384372	14485224	True	AF384372	Eukaryote
HIV-1 isolate URTR23 from Uruguay, complete genome	9770	linear	AF385934	14579592	True	AF385934	Eukaryote
HIV-1 isolate URTR35 from Uruguay, complete genome	9762	linear	AF385935	14579602	True	AF385935	Eukaryote
HIV-1 isolate ARMA159 from Argentina, complete genome	9704	linear	AF385936	14579612	True	AF385936	Eukaryote
Tiger frog virus, complete genome	105057	linear	AF389451	18656492	True	AF389451	Eukaryote
Simian adenovirus 25, complete genome	36521	linear	AF394196	17105037	True	AF394196	Eukaryote
Turnip mosaic virus strain C1, complete genome	9808	linear	AF394601	15055163	True	AF394601	Eukaryote
Equinus papillomavirus, complete genome	7613	linear	AF394740	22901192	True	AF394740	Eukaryote
Duck hepatitis B virus, complete genome	3024	circular	AF404406	15150396	True	AF404406	Eukaryote
Human poliovirus 1 isolate HAI01007, complete genome	7441	linear	AF405666	20069364	True	AF405666	Eukaryote
Human poliovirus 1 isolate HAI00003, complete genome	7442	linear	AF405669	20069366	True	AF405669	Eukaryote
Classical swine fever virus 39, complete genome	12297	linear	AF407339	15488012	True	AF407339	Eukaryote
HIV-1 isolate VAU group O from France, complete genome	9330	linear	AF407418	16755645	True	AF407418	Eukaryote
HIV-1 isolate hypermutated VAU group O from France, complete genome	9329	linear	AF407419	16755652	True	AF407419	Eukaryote
HIV-1 isolate A025 from Argentina, complete genome	8937	linear	AF408626	15788237	True	AF408626	Eukaryote
HIV-1 isolate A047 from Argentina, complete genome	8943	linear	AF408627	15788247	True	AF408627	Eukaryote
HIV-1 isolate A063 from Argentina, complete genome	8973	linear	AF408628	15788257	True	AF408628	Eukaryote
HIV-1 isolate A32879 from Argentina, complete genome	9192	linear	AF408629	15788267	True	AF408629	Eukaryote
HIV-1 isolate A32989 from Argentina, complete genome	9174	linear	AF408630	15788277	True	AF408630	Eukaryote
HIV-1 isolate A050 from Argentina, complete genome	8976	linear	AF408631	15788287	True	AF408631	Eukaryote
HIV-1 isolate A32878 from Argentina, complete genome	9162	linear	AF408632	15788297	True	AF408632	Eukaryote
Lumpy skin disease virus NW-LW isolate Neethling Warmbaths LW, complete genome	150793	linear	AF409137	22595533	True	AF409137	Eukaryote
Lumpy skin disease virus isolate Neethling vaccine LW 1959, complete genome	150509	linear	AF409138	22595692	True	AF409138	Eukaryote
Amphotropic murine leukemia virus strain 1313, complete genome	8217	linear	AF411814	28892668	True	AF411814	Eukaryote
HIV-1 isolate 99ZACM4 from South Africa, complete genome	9764	linear	AF411964	24181477	True	AF411964	Eukaryote
HIV-1 isolate 98ZADu178 from South Africa, complete genome	9728	linear	AF411965	24181487	True	AF411965	Eukaryote
HIV-1 isolate 99ZASW7 from South Africa, complete genome	9741	linear	AF411966	24181497	True	AF411966	Eukaryote
HIV-1 isolate 99ZACM9 from South Africa, complete genome	9761	linear	AF411967	24181507	True	AF411967	Eukaryote
HIV-1 isolate 98UA0116 from Ukraine, complete genome	9740	linear	AF413987	18699185	True	AF413987	Eukaryote
HIV-1 isolate 98BY10443 from Belarus, complete genome	9687	linear	AF414006	18699247	True	AF414006	Eukaryote
Enterovirus J strain N125, complete genome	7383	linear	AF414372	168805210	True	AF414372	Eukaryote
Australian bat lyssavirus, complete genome	11918	linear	AF418014	22726511	True	AF418014	Eukaryote
Hepatitis B virus patient 313 clone 7, complete genome	3003	circular	AF418690	25005062	True	AF418690	Eukaryote
Hepatitis B virus patient 313 clone 8, complete genome	3002	circular	AF418691	25005063	True	AF418691	Eukaryote
Human papillomavirus type 91, complete genome	7966	circular	AF419318	22023568	True	AF419318	Eukaryote
HIV-1 isolate X421 from Spain, complete genome	8980	linear	AF423757	17902114	True	AF423757	Eukaryote
HIV-1 isolate X475 from Spain, complete genome	8945	linear	AF423758	17902125	True	AF423758	Eukaryote
HIV-1 isolate X477 from Spain, complete genome	8901	linear	AF423759	17902136	True	AF423759	Eukaryote
HIV-1 isolate X558 from Spain, complete genome	8950	linear	AF423760	17902147	True	AF423760	Eukaryote
Hepatitis D virus isolate TWD2577-66 genotype I, complete genome	1674	linear	AF425644	23451562	True	AF425644	Eukaryote
Hepatitis D virus isolate TWD2476-38 genotype IIa, complete genome	1682	linear	AF425645	23451565	True	AF425645	Eukaryote
Tomato leaf curl Bangalore virus-[Kolar] DNA A, complete genome	2752	circular	AF428255	16566570	True	AF428255	Eukaryote
Sindbis virus isolate SW6562, complete genome	11569	linear	AF429428	20086759	True	AF429428	Eukaryote
Human papillomavirus - cand89, complete genome	8078	linear	AF436128	22095322	True	AF436128	Eukaryote
Human papillomavirus type 54 subtype AE9, complete genome	7717	linear	AF436129	27462475	True	AF436129	Eukaryote
Human papillomavirus type 74 subtype AE10, complete genome	7887	linear	AF436130	27462483	True	AF436130	Eukaryote
Shrimp white spot syndrome virus, complete genome	307287	circular	AF440570	19481591	True	AF440570	Eukaryote
HIV-1 isolate 96BWMO1.5 from Botswana, complete genome	9037	linear	AF443074	17046511	True	AF443074	Eukaryote
HIV-1 isolate 96BWMO3.2 from Botswana, complete genome	9108	linear	AF443075	17046521	True	AF443075	Eukaryote
HIV-1 isolate 98BWMC12.2 from Botswana, complete genome	9058	linear	AF443076	17046531	True	AF443076	Eukaryote
HIV-1 isolate 98BWMC13.4 from Botswana, complete genome	9079	linear	AF443077	17046541	True	AF443077	Eukaryote
HIV-1 isolate 98BWMC14.a3 from Botswana, complete genome	9026	linear	AF443078	17046551	True	AF443078	Eukaryote
HIV-1 isolate 98BWMO14.10 from Botswana, complete genome	9110	linear	AF443079	17046561	True	AF443079	Eukaryote
HIV-1 isolate 98BWMO18.d5 from Botswana, complete genome	9098	linear	AF443080	17046571	True	AF443080	Eukaryote
HIV-1 isolate 98BWMO36.a5 from Botswana, complete genome	9086	linear	AF443081	17046581	True	AF443081	Eukaryote
HIV-1 isolate 98BWMO37.d5 from Botswana, complete genome	9028	linear	AF443082	17046591	True	AF443082	Eukaryote
HIV-1 isolate 99BW3932.12 from Botswana, complete genome	8999	linear	AF443083	17046601	True	AF443083	Eukaryote
HIV-1 isolate 99BW4642.4 from Botswana, complete genome	8991	linear	AF443084	17046611	True	AF443084	Eukaryote
HIV-1 isolate 99BW4745.8 from Botswana, complete genome	9053	linear	AF443085	17046621	True	AF443085	Eukaryote
HIV-1 isolate 99BW4754.7 from Botswana, complete genome	9002	linear	AF443086	17046631	True	AF443086	Eukaryote
HIV-1 isolate 99BWMC16.8 from Botswana, complete genome	8976	linear	AF443087	17046641	True	AF443087	Eukaryote
HIV-1 isolate 00BW0762.1 from Botswana, complete genome	9047	linear	AF443088	17046651	True	AF443088	Eukaryote
HIV-1 isolate 00BW0768.20 from Botswana, complete genome	9044	linear	AF443089	17046661	True	AF443089	Eukaryote
HIV-1 isolate 00BW0874.21 from Botswana, complete genome	9125	linear	AF443090	17046671	True	AF443090	Eukaryote
HIV-1 isolate 00BW1471.27 from Botswana, complete genome	9082	linear	AF443091	17046681	True	AF443091	Eukaryote
HIV-1 isolate 00BW1616.2 from Botswana, complete genome	9041	linear	AF443092	17046691	True	AF443092	Eukaryote
HIV-1 isolate 00BW1686.8 from Botswana, complete genome	9112	linear	AF443093	17046701	True	AF443093	Eukaryote
HIV-1 isolate 00BW1759.3 from Botswana, complete genome	9064	linear	AF443094	17046711	True	AF443094	Eukaryote
HIV-1 isolate 00BW1773.2 from Botswana, complete genome	9073	linear	AF443095	17046721	True	AF443095	Eukaryote
HIV-1 isolate 00BW1783.5 from Botswana, complete genome	9111	linear	AF443096	17046731	True	AF443096	Eukaryote
HIV-1 isolate 00BW1795.6 from Botswana, complete genome	9064	linear	AF443097	17046741	True	AF443097	Eukaryote
HIV-1 isolate 00BW1811.3 from Botswana, complete genome	9056	linear	AF443098	17046751	True	AF443098	Eukaryote
HIV-1 isolate 00BW1859.5 from Botswana, complete genome	9069	linear	AF443099	17046761	True	AF443099	Eukaryote
HIV-1 isolate 00BW1880.2 from Botswana, complete genome	8998	linear	AF443100	17046771	True	AF443100	Eukaryote
HIV-1 isolate 00BW1921.13 from Botswana, complete genome	9044	linear	AF443101	17046781	True	AF443101	Eukaryote
HIV-1 isolate 00BW2036.1 from Botswana, complete genome	9077	linear	AF443102	17046791	True	AF443102	Eukaryote
HIV-1 isolate 00BW2063.6 from Botswana, complete genome	9071	linear	AF443103	17046801	True	AF443103	Eukaryote
HIV-1 isolate 00BW2087.2 from Botswana, complete genome	9121	linear	AF443104	17046811	True	AF443104	Eukaryote
HIV-1 isolate 00BW2127.214 from Botswana, complete genome	9093	linear	AF443105	17046821	True	AF443105	Eukaryote
HIV-1 isolate 00BW2128.3 from Botswana, complete genome	8681	linear	AF443106	17046831	True	AF443106	Eukaryote
HIV-1 isolate 00BW2276.7 from Botswana, complete genome	9116	linear	AF443107	17046837	True	AF443107	Eukaryote
HIV-1 isolate 00BW3819.3 from Botswana, complete genome	9104	linear	AF443108	17046847	True	AF443108	Eukaryote
HIV-1 isolate 00BW3842.8 from Botswana, complete genome	9152	linear	AF443109	17046857	True	AF443109	Eukaryote
HIV-1 isolate 00BW3871.3 from Botswana, complete genome	9093	linear	AF443110	17046867	True	AF443110	Eukaryote
HIV-1 isolate 00BW3876.9 from Botswana, complete genome	9030	linear	AF443111	17046877	True	AF443111	Eukaryote
HIV-1 isolate 00BW3886.8 from Botswana, complete genome	9099	linear	AF443112	17046887	True	AF443112	Eukaryote
HIV-1 isolate 00BW3891.6 from Botswana, complete genome	9086	linear	AF443113	17046897	True	AF443113	Eukaryote
HIV-1 isolate 00BW3970.2 from Botswana, complete genome	9094	linear	AF443114	17046907	True	AF443114	Eukaryote
HIV-1 isolate 00BW5031.1 from Botswana, complete genome	9047	linear	AF443115	17046917	True	AF443115	Eukaryote
Reindeer papillomavirus, complete genome	8090	circular	AF443292	22901245	True	AF443292	Eukaryote
Human poliovirus 2 strain EGY88-074, complete genome	7439	linear	AF448782	31745093	True	AF448782	Eukaryote
Human poliovirus 2 strain EGY93-034, complete genome	7441	linear	AF448783	31745095	True	AF448783	Eukaryote
Heliothis zea virus 1, complete genome	228089	circular	AF451898	22671471	True	AF451898	Eukaryote
Potato leafroll virus strain Noir, complete genome	5838	linear	AF453390	18656718	True	AF453390	Eukaryote
Wheat streak mosaic virus isolate Czech, complete genome	9381	linear	AF454454	17981491	True	AF454454	Eukaryote
Hepatitis E virus strain Osh 205, complete genome	7239	linear	AF455784	29134860	True	AF455784	Eukaryote
Human poliovirus 1 isolate HAI01015, complete genome	7441	linear	AF458333	33317619	True	AF458333	Eukaryote
HIV-1 isolate 96CM-1849 from Cameroon, complete genome	8916	linear	AF460972	22532130	True	AF460972	Eukaryote
HIV-1 isolate 96CM-4164 from Cameroon, complete genome	8854	linear	AF460974	22532140	True	AF460974	Eukaryote
Hepatitis B virus isolate FH14-2, complete genome	3194	circular	AF461360	18252558	True	AF461360	Eukaryote
Hepatitis B virus isolate FH10, complete genome	3173	circular	AF461362	18252568	True	AF461362	Eukaryote
Human poliovirus 1 RUS-1161-96-001, complete genome	7441	linear	AF462419	18568230	True	AF462419	Eukaryote
Porcine circovirus type 2 strain SC, complete genome	1768	circular	AF465211	18448942	True	AF465211	Eukaryote
Simian-Human immunodeficiency virus isolate 1B3, complete genome	9942	linear	AF465242	18766382	True	AF465242	Eukaryote
Human coxsackievirus A13 strain Flores, complete genome	7458	linear	AF465511	33317920	True	AF465511	Eukaryote
Human coxsackievirus A15 strain G-9, complete genome	7441	linear	AF465512	33317922	True	AF465512	Eukaryote
Human coxsackievirus A18 strain G-13, complete genome	7457	linear	AF465513	33317924	True	AF465513	Eukaryote
Human coxsackievirus A20 strain IH Pool 35, complete genome	7436	linear	AF465514	33317926	True	AF465514	Eukaryote
Human coxsackievirus A21 strain Kuykendall, complete genome	7405	linear	AF465515	33317928	True	AF465515	Eukaryote
Simian immunodeficiency virus SIVgsn-99CM71, complete genome	9410	linear	AF468658	22037883	True	AF468658	Eukaryote
Simian immunodeficiency virus SIVgsn-99CM166, complete genome	9414	linear	AF468659	22037893	True	AF468659	Eukaryote
HIV-1 strain TH 2-83 from Thailand, complete genome	8820	linear	AF468970	28933401	True	AF468970	Eukaryote
Beet western yellows virus strain USA, complete genome	5666	circular	AF473561	20502871	True	AF473561	Eukaryote
Vesicular stomatitis Indiana virus strain 98COE, complete genome	11162	linear	AF473864	23305062	True	AF473864	Eukaryote
Vesicular stomatitis Indiana virus strain 85CLB, complete genome	11155	linear	AF473865	23305068	True	AF473865	Eukaryote
Vesicular stomatitis Indiana virus strain 94GUB, complete genome	11336	linear	AF473866	23305074	True	AF473866	Eukaryote
Feline immunodeficiency virus subtype C, complete genome	9470	linear	AF474246	20152977	True	AF474246	Eukaryote
Ovine lentivirus strain P1OLV, complete genome	9189	linear	AF479638	28190651	True	AF479638	Eukaryote
Hepatitis C virus type 1b isolate HCV-TR1 from Turkey, complete genome	9361	linear	AF483269	19568932	True	AF483269	Eukaryote
Acute bee paralysis virus isolate Poland 1, complete genome	9463	linear	AF486073	33415008	True	AF486073	Eukaryote
HIV-1 strain 12-69 from Thailand, complete genome	8814	linear	AF490973	23394919	True	AF490973	Eukaryote
HIV-1 strain TH 9-95 from Thailand, complete genome	8815	linear	AF490974	23394927	True	AF490974	Eukaryote
HIV-1 isolate 96CM-4496 from Cameroon, complete genome	8819	circular	AF492623	22532281	True	AF492623	Eukaryote
HIV-1 isolate 95CM-1816 from Cameroon, complete genome	9017	circular	AF492624	22532291	True	AF492624	Eukaryote
Porcine reproductive and respiratory syndrome virus isolate P129, complete genome	15450	linear	AF494042	20271246	True	AF494042	Eukaryote
Hepatitis B virus isolate FG, complete genome	3182	circular	AF498266	23884543	True	AF498266	Eukaryote
Equus caballus papillomavirus type 1, complete genome	7610	linear	AF498323	20335004	True	AF498323	Eukaryote
Human coxsackievirus A1 strain Tompkins, complete genome	7397	linear	AF499635	33304550	True	AF499635	Eukaryote
Human coxsackievirus A11 strain Belgium-1, complete genome	7453	linear	AF499636	33304552	True	AF499636	Eukaryote
Human coxsackievirus A17 strain G12, complete genome	7457	linear	AF499639	33304558	True	AF499639	Eukaryote
Human coxsackievirus A19 strain 8663, complete genome	7410	linear	AF499641	33304562	True	AF499641	Eukaryote
Human coxsackievirus A22 strain Chulman, complete genome	7406	linear	AF499643	33304566	True	AF499643	Eukaryote
Pepper mottle virus Florida, complete genome	9717	linear	AF501591	21667468	True	AF501591	Eukaryote
Bovine viral diarrhea virus 2-New York'93, complete genome	12332	linear	AF502399	22094502	True	AF502399	Eukaryote
Norwalk virus strain Vietnam 026, complete genome	7540	linear	AF504671	47175550	True	AF504671	Eukaryote
Human echovirus 9 strain Barty, complete genome	7453	linear	AF524866	28610113	True	AF524866	Eukaryote
Giardia lamblia virus, complete genome	6273	linear	AF525216	21780360	True	AF525216	Eukaryote
Bovine viral diarrhea virus 1 strain ZM-95, complete genome	12220	linear	AF526381	76781922	True	AF526381	Eukaryote
HIV-1 isolate 02TH.OUR1331 subtype CRF15_01B from Thailand, complete genome	8842	linear	AF529572	33328197	True	AF529572	Eukaryote
HIV-1 isolate 02TH.OUR1332 subtype CRF15_01B from Thailand, complete genome	8867	linear	AF529573	33328187	True	AF529573	Eukaryote
HIV-1 isolate 99TH.R2399 subtype CRF15_01B from Thailand, complete genome	9017	linear	AF530576	33328319	True	AF530576	Eukaryote
Human papillomavirus type 92, complete genome	7461	linear	AF531420	27451616	True	AF531420	Eukaryote
Human poliovirus 1 isolate TCDCE01-135, complete genome	7443	linear	AF538840	33331402	True	AF538840	Eukaryote
Mamestra configurata nucleopolyhedrovirus A 90/4, complete genome	153656	circular	AF539999	33331712	True	AF539999	Eukaryote
Foot-and-mouth disease virus SAT 2 clone ZIM/7/83, complete genome	8173	linear	AF540910	33332022	True	AF540910	Eukaryote
Human parechovirus 2 complete genome	7348	linear	AJ005695	3157410	True	AJ005695	Eukaryote
Human immnunodeficiency virus type 1 complete proviral genome, isolate 89ES061	9214	linear	AJ006287	3163929	True	AJ006287	Eukaryote
Duck hepatitis B virus, complete genome	3027	circular	AJ006350	3218460	True	AJ006350	Eukaryote
Potato virus A RNA complete genome, isolate TamMV	9605	linear	AJ131403	6066616	True	AJ131403	Eukaryote
Hepatitis B virus complete genome, isolate gor97	3182	circular	AJ131567	4007047	True	AJ131567	Eukaryote
Hepatitis B virus complete genome, isolate gib731	2946	circular	AJ131570	4033541	True	AJ131570	Eukaryote
Hepatitis B virus complete genome, isolate gib645	3182	circular	AJ131571	4007062	True	AJ131571	Eukaryote
Hepatitis B virus complete genome, isolate gib160	3182	circular	AJ131572	4007067	True	AJ131572	Eukaryote
Hepatitis B virus complete genome, isolate gib153	3182	circular	AJ131573	4007072	True	AJ131573	Eukaryote
Hepatitis B virus complete genome, isolate gib151	3182	circular	AJ131574	4033546	True	AJ131574	Eukaryote
Hepatitis B virus complete genome, isolate chimp82	3182	circular	AJ131575	4007077	True	AJ131575	Eukaryote
Cotton leaf curl Multan virus-[Faisalabad3] complete genome	2722	circular	AJ132430	7960746	True	AJ132430	Eukaryote
Soil-borne cereal mosaic virus RNA2 complete genome	3683	linear	AJ132577	6018434	True	AJ132577	Eukaryote
Tomato yellow leaf curl virus-Iran complete genome, isolate Iran	2771	circular	AJ132711	4220580	True	AJ132711	Eukaryote
Human poliovirus 1, complete genome. Isolated from faeces of immunodeficient patient 4 days after onset of paresis	7441	linear	AJ132960	6682296	True	AJ132960	Eukaryote
Human poliovirus 1, complete genome. Isolated from an immunodeficient patient 66 months after onset of paresis	7441	linear	AJ132961	6682298	True	AJ132961	Eukaryote
Hepatitis C virus, complete genome, isolate HCV-AD78P1	9533	linear	AJ132997	4753720	True	AJ132997	Eukaryote
Human immunodeficiency virus type 1 complete genome, strain 97NOGIL3	9666	linear	AJ237565	4539033	True	AJ237565	Eukaryote
Avian endogenous retrovirus EAV-HP, complete genome, specific host: Gallus gallus domesticus(Chicken,line 21)	4316	linear	AJ238125	6048193	True	AJ238125	Eukaryote
Potato mop-top virus RNA1 complete genome, Swedish isolate (Sw)	6043	linear	AJ238607	6066602	True	AJ238607	Eukaryote
Hepatitis C virus type 1b complete genome, isolate NC1	9033	linear	AJ238800	5748510	True	AJ238800	Eukaryote
Cottontail rabbit papillomavirus subtype b complete genome	7867	circular	AJ243287	8919565	True	AJ243287	Eukaryote
Pothos latent virus complete genome, pigeonpea strain	4354	linear	AJ243370	6143718	True	AJ243370	Eukaryote
Apple chlorotic leaf spot virus complete genomic RNA	7545	linear	AJ243438	5302760	True	AJ243438	Eukaryote
Human immunodeficiency virus type 1 proviral complete genome, isolate 95ML84	9715	linear	AJ245481	7594607	True	AJ245481	Eukaryote
sugarcane yellow leaf virus complete genome, cultivar CP65-357	5895	linear	AJ249447	6996590	True	AJ249447	Eukaryote
Tomato bushy stunt virus genomic RNA, statice isolate, complete genome	4770	linear	AJ249740	5921570	True	AJ249740	Eukaryote
Human immunodeficiency virus type 1 complete genome (isolate 98SE-MP1211)	8851	linear	AJ251056	7452898	True	AJ251056	Eukaryote
Human immunodeficiency virus type 1 complete genome (isolate 98SE-MP1213)	8857	linear	AJ251057	7452908	True	AJ251057	Eukaryote
Stork hepatitis B virus1, complete genome, isolate STHBV-21	3033	circular	AJ251937	17932893	True	AJ251937	Eukaryote
pea seed-borne mosaic virus complete genome	9905	linear	AJ252242	7414434	True	AJ252242	Eukaryote
Human immunodeficiency virus type 1 proviral genome, isolate GB8, clone 46R	9679	linear	AJ271445	8218025	True	AJ271445	Eukaryote
Transmissible gastroenteritis virus complete genome, genomic RNA	28586	linear	AJ271965	13397900	True	AJ271965	Eukaryote
Human immunodeficiency virus type 1 complete genome, Cameroon strain 97CM-MP818	9711	linear	AJ291718	18073400	True	AJ291718	Eukaryote
Human immunodeficiency virus type 1 complete genome, strain 99FR-MP129	9737	linear	AJ291719	15209251	True	AJ291719	Eukaryote
Human immunodeficiency virus type 1 complete genome, strain 99FR-MP1307	9769	linear	AJ291720	18073410	True	AJ291720	Eukaryote
Human poliovirus type 3 complete genome, live-attenuated strain USOL-D-bac, genomic RNA	7436	linear	AJ293918	9998764	True	AJ293918	Eukaryote
Chicken anaemia virus complete genome, clone 34	2297	circular	AJ297685	18643934	True	AJ297685	Eukaryote
Human immunodeficiency virus type 1 complete genome, strain 99SE-MP1299	9859	linear	AJ302646	14041625	True	AJ302646	Eukaryote
Human immunodeficiency virus type 1 complete genome, strain 99SE-MP1300	9829	linear	AJ302647	14041635	True	AJ302647	Eukaryote
Borna disease virus, strain No/98, complete genome	8908	linear	AJ311524	15718106	True	AJ311524	Eukaryote
Bean common mosaic virus cowpea isolate Y, complete genome	10062	linear	AJ312438	18621101	True	AJ312438	Eukaryote
Indian cassava mosaic virus-[Maharashtra] DNA-A, complete genome, isolate ICMV-Mah	2739	circular	AJ314739	18073911	True	AJ314739	Eukaryote
Tomato yellow leaf curl China virus-Tb[Y11] DNA A, complete genome, isolate Y11	2737	circular	AJ319676	18076940	True	AJ319676	Eukaryote
Human papillomavirus type 87 (candidate) complete genome	7998	circular	AJ400628	14475578	True	AJ400628	Eukaryote
Mungbean yellow mosaic India virus-[SoybeanTN] complete genome	2747	circular	AJ416349	16151551	True	AJ416349	Eukaryote
Tobacco curly shoot virus-associated DNA beta complete genome, isolate Y2	1354	circular	AJ421485	27805162	True	AJ421485	Eukaryote
Tomato yellow leaf curl China virus-associated DNA beta complete genome, isolate Y25	1339	circular	AJ421619	27805164	True	AJ421619	Eukaryote
Tomato yellow leaf curl China virus-associated DNA beta complete genome, isolate Y5	1333	circular	AJ421623	27805172	True	AJ421623	Eukaryote
Sweet potato chlorotic stunt virus RNA2	8223	linear	AJ428555	22535418	True	AJ428555	Eukaryote
Papaya leaf curl virus complete genome	2753	circular	AJ436992	47232508	True	AJ436992	Eukaryote
Potato virus M complete genomic RNA, isolate Hangzhou	8526	linear	AJ437481	44804328	True	AJ437481	Eukaryote
Eupatorium yellow vein virus-[MNS2] complete genome, isolate Fukuoka-MNS2	2765	circular	AJ438936	27526739	True	AJ438936	Eukaryote
Eupatorium yellow vein virus-[SOJ3] complete genome, isolate Fukuoka-SOJ3	2778	circular	AJ438937	27526746	True	AJ438937	Eukaryote
Tobacco curly shoot virus-associated DNA beta complete genome, isolate Y115	1352	circular	AJ457822	27528803	True	AJ457822	Eukaryote
Tomato yellow leaf curl Thailand virus-[Y72] complete genome, isolate Y72	2748	circular	AJ495812	22035838	True	AJ495812	Eukaryote
Cotton leaf curl Kokhran virus-[Faisalabad1] complete genome, isolate Faisalabad x2f	2750	circular	AJ496286	21954479	True	AJ496286	Eukaryote
Human immunodeficiency virus type 1 complete proviral genome, isolate 97NE03	9794	linear	AJ508595	37496481	True	AJ508595	Eukaryote
Human immunodeficiency virus type 1 complete proviral genome, isolate 00NE95	9698	linear	AJ508596	37496489	True	AJ508596	Eukaryote
Human immunodeficiency virus type 1 complete proviral genome, isolate 00NE36	9730	linear	AJ508597	37496497	True	AJ508597	Eukaryote
Hollyhock leaf crumple virus - [Cairo2] complete genome, clone H90-7	2740	circular	AJ542539	28268552	True	AJ542539	Eukaryote
Simian foamy virus-orangutan complete proviral genome, isolate bella	12823	linear	AJ544579	32812827	True	AJ544579	Eukaryote
Ageratum yellow vein China virus - [Hn2.19] complete genome, isolate Hn2-19	2748	circular	AJ564744	31408104	True	AJ564744	Eukaryote
Feline foamy virus complete proviral genome, strain Chatul-3	11658	linear	AJ564746	34392236	True	AJ564746	Eukaryote
Human echovirus 11, isolate HUN-1108, complete virion genome	7433	linear	AJ577589	50399446	True	AJ577589	Eukaryote
Human echovirus 11, isolate FIN-0666, complete virion genome	7433	linear	AJ577590	50399448	True	AJ577590	Eukaryote
Fowlpox virus (isolate HP-438[Munich]), passage 438 clone FP9, complete genome	266145	linear	AJ581527	41023293	True	AJ581527	Eukaryote
Rice yellow mottle virus complete genome, isolate Ma10	4451	linear	AJ608208	45535262	True	AJ608208	Eukaryote
Rice yellow mottle virus complete genome, isolate SL4	4453	linear	AJ608214	45535292	True	AJ608214	Eukaryote
Rice yellow mottle virus complete genome, isolate Tz3	4457	linear	AJ608216	45535302	True	AJ608216	Eukaryote
Rice yellow mottle virus complete genome, isolate CIa	4452	linear	AJ608219	45535317	True	AJ608219	Eukaryote
Cacao swollen shoot virus complete genome, isolate Peki	7141	circular	AJ609019	56266242	True	AJ609019	Eukaryote
Cacao swollen shoot virus complete genome, isolate N1A	7006	circular	AJ609020	56266249	True	AJ609020	Eukaryote
Human papillomavirus type 43 complete genome	7975	circular	AJ620205	40804474	True	AJ620205	Eukaryote
Bovine papillomavirus type 6 complete genome	7296	circular	AJ620208	40804501	True	AJ620208	Eukaryote
Human papillomavirus type 81 complete genome	8070	circular	AJ620209	40804509	True	AJ620209	Eukaryote
Human papillomavirus type 94 complete genome	7881	circular	AJ620211	40804528	True	AJ620211	Eukaryote
Torque teno virus, isolate tth6, complete genome	3740	circular	AJ620212	49202944	True	AJ620212	Eukaryote
Torque teno virus, isolate tth18, complete genome	3742	circular	AJ620215	49202957	True	AJ620215	Eukaryote
Torque teno virus, isolate tth20, complete genome	3743	circular	AJ620216	49202961	True	AJ620216	Eukaryote
Torque teno virus, isolate tth21, complete genome	3741	circular	AJ620217	49202965	True	AJ620217	Eukaryote
Torque teno virus, isolate tth9, complete genome	3755	circular	AJ620219	49202973	True	AJ620219	Eukaryote
Torque teno virus, isolate tth31, complete genome	3757	circular	AJ620225	49202997	True	AJ620225	Eukaryote
Torque teno virus, isolate tth4, complete genome	3772	circular	AJ620226	49203001	True	AJ620226	Eukaryote
Torque teno virus, isolate tth29, complete genome	3700	circular	AJ620229	49203012	True	AJ620229	Eukaryote
Torque teno virus, isolate tth23, complete genome	3753	circular	AJ620235	49203040	True	AJ620235	Eukaryote
Tomato yellow leaf curl China virus-associated DNA beta complete genome, isolate G35	1345	circular	AJ704605	47155216	True	AJ704605	Eukaryote
Tomato leaf curl China virus-associated DNA beta complete genome, isolate G7	1345	circular	AJ704618	47155242	True	AJ704618	Eukaryote
Sulfolobus islandicus rudivirus 1 variant XX, complete genome	33641	linear	AJ748296	55770953	True	AJ748296	Eukaryote
Cacao swollen shoot virus complete genome	7297	circular	AJ781003	56266278	True	AJ781003	Eukaryote
Tomato yellow leaf curl China virus-associated DNA beta, complete genome clone 4, isolate Y10	1335	circular	AJ781297	50344401	True	AJ781297	Eukaryote
Tomato yellow leaf curl China virus-associated DNA beta, complete genome clone 8, isolate Y43	1261	circular	AJ781301	50344409	True	AJ781301	Eukaryote
Sida yellow mosaic China virus - [Hainan 8] complete genome, isolate Hn8	2749	circular	AJ810096	51465214	True	AJ810096	Eukaryote
Stachytarpheta leaf curl virus - [Hn34] complete genome, isolate Hn34	2748	circular	AJ810157	51127362	True	AJ810157	Eukaryote
Barley yellow dwarf virus - PAV complete genome, isolate ASL-1, genomic RNA	5674	linear	AJ810418	60649812	True	AJ810418	Eukaryote
Carnation mottle virus complete genome, isolate Indian	4005	linear	AJ811998	51965127	True	AJ811998	Eukaryote
Carnation etched ring virus, complete genome, Indian isolate	7924	linear	AJ853858	55250904	True	AJ853858	Eukaryote
Potato virus S complete genome, isolate Vltava	8464	linear	AJ863510	71609021	True	AJ863510	Eukaryote
Tomato leaf curl Madagascar virus-Androy [Madagascar:Toliary:2001], isolate Toliary complete genome	2775	linear	AJ865339	60417266	True	AJ865339	Eukaryote
Tomato leaf curl Comoros virus complete genome, isolate Mayote:Dembeni:2003	2765	circular	AJ865341	60417280	True	AJ865341	Eukaryote
Human immunodeficiency virus 1 complete genome, isolate 00IC-10092	9775	linear	AJ866553	71794574	True	AJ866553	Eukaryote
Human immunodeficiency virus 1 complete genome, isolate 01IC-17395	9782	linear	AJ866554	71794584	True	AJ866554	Eukaryote
Human immunodeficiency virus 1 complete genome, isolate 97IC-PCI3	9814	linear	AJ866555	71794594	True	AJ866555	Eukaryote
Human immunodeficiency virus 1 complete genome, isolate 01IC-PCI118	9771	linear	AJ866556	71794603	True	AJ866556	Eukaryote
Human immunodeficiency virus 1 complete genome, isolate 01IC-PCI123	9809	linear	AJ866557	71794612	True	AJ866557	Eukaryote
Human immunodeficiency virus 1 complete genome, isolate 01IC-PCI127	9752	linear	AJ866558	71794622	True	AJ866558	Eukaryote
Rice yellow mottle virus complete genome, serotype S6, country Tanzania, Mangula	4444	linear	AJ876793	60098059	True	AJ876793	Eukaryote
Tobacco leaf curl Yunnan virus-[Y283] complete genome, isolate Y283	2747	circular	AJ971267	66351648	True	AJ971267	Eukaryote
Malvastrum yellow vein virus-associated DNA beta complete genome, isolate Y251	1339	circular	AJ971705	66471739	True	AJ971705	Eukaryote
Human immunodeficiency virus type 1 complete genome, subtype A4, isolate 97CD.KCC2	9740	linear	AM000053	88853341	True	AM000053	Eukaryote
Human immunodeficiency virus type 1 complete genome, subtype A4, isolate 02CD.KTB035	9740	linear	AM000055	88853112	True	AM000055	Eukaryote
Human poliovirus 2 complete virion genome, isolate PV2/5021-1/ISR99	7312	linear	AM040036	68051136	True	AM040036	Eukaryote
Human poliovirus 2 complete virion genome, isolate PV2/5104-1/ISR99	7312	linear	AM040038	68051140	True	AM040038	Eukaryote
Human poliovirus 2 complete virion genome, isolate PV2/5116-9/ISR99	7312	linear	AM040039	68051142	True	AM040039	Eukaryote
Tomato yellow leaf curl China virus-associated DNA beta complete genome, isolate G102	1342	circular	AM050556	71060537	True	AM050556	Eukaryote
Tomato yellow leaf curl China virus-associated DNA beta complete genome, isolate G103	1342	circular	AM050557	71060539	True	AM050557	Eukaryote
Sida leaf curl virus-associated DNA 1 complete genome, isolate Hn60	1379	circular	AM050735	83308076	True	AM050735	Eukaryote
Alternanthera yellow vein virus complete genome, isolate Hn51	2745	circular	AM050736	83308078	True	AM050736	Eukaryote
Sugarcane yellow leaf virus complete genome, isolate REU-YL2	5612	linear	AM072756	86988934	True	AM072756	Eukaryote
Pepino mosaic virus complete genome, isolate SM.74	6468	linear	AM109896	79676039	True	AM109896	Eukaryote
Hepatitis B virus, isolate CHIMP_BAT, complete genome	3181	circular	AM117396	116487006	True	AM117396	Eukaryote
Simian immunodeficiency virus pcomplete proviral genome, isolate SIVtal-01CM8023	8845	linear	AM182197	90968069	True	AM182197	Eukaryote
Human parechovirus 4 complete genome, genomic RNA, strain T75-4077	7350	linear	AM235750	111607002	True	AM235750	Eukaryote
Tomato leaf curl New Delhi virus, complete genome, clone ToA2	2739	circular	AM258977	219937569	True	AM258977	Eukaryote
Malvastrum yellow mosaic virus satellite DNA beta complete genome, isolate Hn36	715	circular	AM260203	118196978	True	AM260203	Eukaryote
Malvastrum yellow mosaic virus satellite DNA beta complete genome, isolate Hn44	681	circular	AM260204	118196979	True	AM260204	Eukaryote
Tomato yellow leaf curl China virus complete genome, isolate Y244	2729	circular	AM260702	94960472	True	AM260702	Eukaryote
Tomato yellow leaf curl China virus complete genome, isolate Y295	2740	circular	AM260703	94960479	True	AM260703	Eukaryote
Tomato yellow leaf curl China virus satellite DNA beta complete genome, isolate Y265	1339	circular	AM260723	94960504	True	AM260723	Eukaryote
Tomato yellow leaf curl China virus satellite DNA beta complete genome, isolate Y268	1342	circular	AM260724	94960506	True	AM260724	Eukaryote
Tomato yellow leaf curl China virus satellite DNA beta complete genome, isolate Y298	1337	circular	AM260733	94960524	True	AM260733	Eukaryote
Tomato yellow leaf curl China virus -[Y264] complete genome, isolate Y264	2741	circular	AM261326	94536490	True	AM261326	Eukaryote
Hepatitis B virus complete genome, clone LB3Clone5	2833	circular	AM295799	133919221	True	AM295799	Eukaryote
Euphorbia leaf curl Guangxi virus complete genome, isolate G35-1	2747	circular	AM411424	121495530	True	AM411424	Eukaryote
Malvastrum leaf curl Guangdong virus complete genome, isolate FJ3	2765	circular	AM503104	146189479	True	AM503104	Eukaryote
Pepper yellow vein Mali virus DNA-A, complete genome, isolate F26	2786	circular	AM691555	145280392	True	AM691555	Eukaryote
TT virus sle1957 complete genome	3773	circular	AM711976	156104001	True	AM711976	Eukaryote
African swine fever virus Benin 97/1 pathogenic isolate, complete genome	182284	linear	AM712239	162849209	True	AM712239	Eukaryote
Cherry chlorotic rusty spot associated small satellite-like dsRNA A complete genome, genomic RNA	574	linear	AM749118	157888326	True	AM749118	Eukaryote
Cherry chlorotic rusty spot associated small satellite-like dsRNA B putative chrysovirus satellite RNA, complete genome, genomic RNA	606	linear	AM749119	157888327	True	AM749119	Eukaryote
Cherry chlorotic rusty spot associated small satellite-like dsRNA C complete genome, genomic RNA	609	linear	AM749120	157888328	True	AM749120	Eukaryote
Human adenovirus type 31 complete genome, serotype 31	33763	linear	AM749299	269990916	True	AM749299	Eukaryote
Chrysanthemum virus B complete genome, genomic RNA, isolate Uttar Pradesh	8836	linear	AM765837	152002999	True	AM765837	Eukaryote
Chrysanthemum virus B complete genome, genomic RNA, isolate Uttarakhand	8815	linear	AM765838	152003006	True	AM765838	Eukaryote
Chrysanthemum virus B complete genome, genomic RNA, isolate Tamil Nadu	8833	linear	AM765839	152003013	True	AM765839	Eukaryote
Chickpea chlorotic dwarf virus complete genome, clone ccdv 14	2561	circular	AM849096	194305676	True	AM849096	Eukaryote
Human poliovirus 2, complete genome, genomic RNA, isolate VDPV MAD006	7439	linear	AM884185	164420618	True	AM884185	Eukaryote
Abutilon mosaic virus DNA-B south africa isolate, complete genome	2609	linear	AM886130	161513313	True	AM886130	Eukaryote
Euphorbia mosaic virus Peru DNA-A, complete genome	2600	linear	AM886131	161513316	True	AM886131	Eukaryote
Murine cytomegalovirus (strain K181), complete genome	230301	linear	AM886412	157676102	True	AM886412	Eukaryote
Chilli veinal mottle virus complete genome, genomic RNA, isolate Korea	9710	linear	AM909717	283468542	True	AM909717	Eukaryote
Hepatitis C virus subtype 1g complete genome	9490	linear	AM910652	191174856	True	AM910652	Eukaryote
Wheat dwarf virus complete genome defecetive form, isolate SA45Ecogr11	2325	circular	AM921996	218091950	True	AM921996	Eukaryote
Barley dwarf virus complete genome defective form, isolate SA43Ecogr15	1894	circular	AM922263	218091971	True	AM922263	Eukaryote
Barley dwarf virus complete genome defective form, isolate SA12EcoSm4	618	circular	AM922264	218091975	True	AM922264	Eukaryote
Barley dwarf virus complete genome defective form, isolate SA43Ecokl12	570	circular	AM932875	219893737	True	AM932875	Eukaryote
Barley dwarf virus complete genome defective form, isolate SA43Ecokl14	559	circular	AM932876	219893739	True	AM932876	Eukaryote
Chickpea chlorotic dwarf virus complete genome, clone CpCDSV_Eco18	2573	circular	AM933135	165993341	True	AM933135	Eukaryote
Hepatitis E virus genomic RNA, complete genome, isolate: JRA1	7230	linear	AP003430	15320510	True	AP003430	Eukaryote
Human immunodeficiency virus 1 genomic RNA, complete genome, isolate:HH069	8803	linear	AP005206	27227840	True	AP005206	Eukaryote
Human immunodeficiency virus 1 genomic RNA, complete genome, isolate:HH086	8795	linear	AP005207	27227850	True	AP005207	Eukaryote
Cyprinid herpesvirus 3 DNA, complete genome, strain: TUMST1	295052	linear	AP008984	129560509	True	AP008984	Eukaryote
Human adenovirus 65 DNA, complete genome, strain: BGD/2004/B172/[P58/H10/F9]	35172	linear	AP012285	363987165	True	AP012285	Eukaryote
Human adenovirus 67 DNA, complete genome, strain: BGD/2005/B109/[P67/H9/F67]	35075	linear	AP012302	378786191	True	AP012302	Eukaryote
Equid herpesvirus 1 DNA, complete genome, isolate: 5586	148777	linear	AP012321	442564372	True	AP012321	Eukaryote
Uncultured Mediterranean phage uvMED DNA, complete genome, group G1, isolate: uvMED-CGR-U-MedDCM-OCT-S27-C45	33328	linear	AP013358	557356464	True	AP013358	Eukaryote
Uncultured Mediterranean phage uvMED DNA, complete genome, group G1, isolate: uvMED-CGR-U-MedDCM-OCT-S28-C23	37910	linear	AP013359	557356465	True	AP013359	Eukaryote
Uncultured Mediterranean phage uvMED DNA, complete genome, group G1, isolate: uvMED-CGR-U-MedDCM-OCT-S40-C16	39847	linear	AP013360	557356466	True	AP013360	Eukaryote
Uncultured Mediterranean phage uvMED DNA, complete genome, group G10, isolate: uvMED-CGR-U-MedDCM-OCT-S34-C1	43957	linear	AP013361	557356467	True	AP013361	Eukaryote
Uncultured Mediterranean phage uvMED DNA, complete genome, group G11, isolate: uvMED-CGR-C52A-MedDCM-OCT-S24-C15	39365	linear	AP013362	557356468	True	AP013362	Eukaryote
Uncultured Mediterranean phage uvMED DNA, complete genome, group G11, isolate: uvMED-CGR-C52A-MedDCM-OCT-S34-C21	39568	linear	AP013363	557356469	True	AP013363	Eukaryote
Uncultured Mediterranean phage uvMED DNA, complete genome, group G11, isolate: uvMED-CGR-C52A-MedDCM-OCT-S37-C18	39662	linear	AP013364	557356470	True	AP013364	Eukaryote
Uncultured Mediterranean phage uvMED DNA, complete genome, group G11, isolate: uvMED-CGR-C52A-MedDCM-OCT-S38-C20	39568	linear	AP013365	557356471	True	AP013365	Eukaryote
Uncultured Mediterranean phage uvMED DNA, complete genome, group G11, isolate: uvMED-CGR-C52A-MedDCM-OCT-S42-C25	39473	linear	AP013366	557356472	True	AP013366	Eukaryote
Uncultured Mediterranean phage uvMED DNA, complete genome, group G11, isolate: uvMED-CGR-U-MedDCM-OCT-S31-C11	39425	linear	AP013367	557356473	True	AP013367	Eukaryote
Uncultured Mediterranean phage uvMED DNA, complete genome, group G11, isolate: uvMED-CGR-U-MedDCM-OCT-S25-C42	35263	linear	AP013368	557356474	True	AP013368	Eukaryote
Uncultured Mediterranean phage uvMED DNA, complete genome, group G12, isolate: uvMED-CGR-U-MedDCM-OCT-S43-C17	41524	linear	AP013369	557356475	True	AP013369	Eukaryote
Uncultured Mediterranean phage uvMED DNA, complete genome, group G13, isolate: uvMED-CGR-C115A-MedDCM-OCT-S39-C87	30903	linear	AP013370	557356476	True	AP013370	Eukaryote
Uncultured Mediterranean phage uvMED DNA, complete genome, group G13, isolate: uvMED-CGR-C70A-MedDCM-OCT-S35-C74	32431	linear	AP013372	557356478	True	AP013372	Eukaryote
Uncultured Mediterranean phage uvMED DNA, complete genome, group G13, isolate: uvMED-CGR-C70A-MedDCM-OCT-S39-C80	32222	linear	AP013373	557356479	True	AP013373	Eukaryote
Uncultured Mediterranean phage uvMED DNA, complete genome, group G13, isolate: uvMED-CGR-C78-MedDCM-OCT-S42-C9	41867	linear	AP013374	557356480	True	AP013374	Eukaryote
Uncultured Mediterranean phage uvMED DNA, complete genome, group G13, isolate: uvMED-CGR-U-MedDCM-OCT-S29-C4	42168	linear	AP013375	557356481	True	AP013375	Eukaryote
Uncultured Mediterranean phage uvMED DNA, complete genome, group G13, isolate: uvMED-CGR-U-MedDCM-OCT-S34-C52	34433	linear	AP013376	557356482	True	AP013376	Eukaryote
Uncultured Mediterranean phage uvMED DNA, complete genome, group G13, isolate: uvMED-CGR-U-MedDCM-OCT-S36-C15	40138	linear	AP013377	557356483	True	AP013377	Eukaryote
Uncultured Mediterranean phage uvMED DNA, complete genome, group G14, isolate: uvMED-CGR-U-MedDCM-OCT-S23-C32	34514	linear	AP013378	557356484	True	AP013378	Eukaryote
Uncultured Mediterranean phage uvMED DNA, complete genome, group G14, isolate: uvMED-CGR-U-MedDCM-OCT-S28-C43	33989	linear	AP013379	557356485	True	AP013379	Eukaryote
Uncultured Mediterranean phage uvMED DNA, complete genome, group G14, isolate: uvMED-CGR-U-MedDCM-OCT-S31-C41	34478	linear	AP013380	557356486	True	AP013380	Eukaryote
Uncultured Mediterranean phage uvMED DNA, complete genome, group G14, isolate: uvMED-CGR-U-MedDCM-OCT-S36-C63	33690	linear	AP013381	557356487	True	AP013381	Eukaryote
Uncultured Mediterranean phage uvMED DNA, complete genome, group G14, isolate: uvMED-CGR-U-MedDCM-OCT-S45-C13	41230	linear	AP013382	557356488	True	AP013382	Eukaryote
Uncultured Mediterranean phage uvMED DNA, complete genome, group G15, isolate: uvMED-CGR-C110A-MedDCM-OCT-S24-C13	39751	linear	AP013383	557356489	True	AP013383	Eukaryote
Uncultured Mediterranean phage uvMED DNA, complete genome, group G15, isolate: uvMED-CGR-C111A-MedDCM-OCT-S34-C44	35473	linear	AP013384	557356490	True	AP013384	Eukaryote
Uncultured Mediterranean phage uvMED DNA, complete genome, group G15, isolate: uvMED-CGR-C16-MedDCM-OCT-S39-C44	36025	linear	AP013385	557356491	True	AP013385	Eukaryote
Uncultured Mediterranean phage uvMED DNA, complete genome, group G15, isolate: uvMED-CGR-C23-MedDCM-OCT-S37-C51	34952	linear	AP013386	557356492	True	AP013386	Eukaryote
Uncultured Mediterranean phage uvMED DNA, complete genome, group G15, isolate: uvMED-CGR-C42-MedDCM-OCT-S29-C52	34473	linear	AP013387	557356493	True	AP013387	Eukaryote
Uncultured Mediterranean phage uvMED DNA, complete genome, group G15, isolate: uvMED-CGR-C54-MedDCM-OCT-S36-C37	36799	linear	AP013388	557356494	True	AP013388	Eukaryote
Uncultured Mediterranean phage uvMED DNA, complete genome, group G15, isolate: uvMED-CGR-C54A-MedDCM-OCT-S39-C35	36730	linear	AP013389	557356495	True	AP013389	Eukaryote
Uncultured Mediterranean phage uvMED DNA, complete genome, group G15, isolate: uvMED-CGR-C6-MedDCM-OCT-S27-C41	33823	linear	AP013390	557356496	True	AP013390	Eukaryote
Uncultured Mediterranean phage uvMED DNA, complete genome, group G15, isolate: uvMED-CGR-C6A-MedDCM-OCT-S33-C54	34434	linear	AP013391	557356497	True	AP013391	Eukaryote
Uncultured Mediterranean phage uvMED DNA, complete genome, group G15, isolate: uvMED-CGR-C6A-MedDCM-OCT-S43-C64	34445	linear	AP013392	557356498	True	AP013392	Eukaryote
Uncultured Mediterranean phage uvMED DNA, complete genome, group G15, isolate: uvMED-CGR-C72-MedDCM-OCT-S43-C21	39693	linear	AP013393	557356499	True	AP013393	Eukaryote
Uncultured Mediterranean phage uvMED DNA, complete genome, group G15, isolate: uvMED-CGR-C85-MedDCM-OCT-S24-C7	41207	linear	AP013394	557356500	True	AP013394	Eukaryote
Uncultured Mediterranean phage uvMED DNA, complete genome, group G15, isolate: uvMED-CGR-C85-MedDCM-OCT-S43-C18	41059	linear	AP013395	557356501	True	AP013395	Eukaryote
Uncultured Mediterranean phage uvMED DNA, complete genome, group G15, isolate: uvMED-CGR-C99-MedDCM-OCT-S44-C25	36966	linear	AP013396	557356502	True	AP013396	Eukaryote
Uncultured Mediterranean phage uvMED DNA, complete genome, group G15, isolate: uvMED-CGR-U-MedDCM-OCT-S25-C46	34966	linear	AP013397	557356503	True	AP013397	Eukaryote
Uncultured Mediterranean phage uvMED DNA, complete genome, group G15, isolate: uvMED-CGR-U-MedDCM-OCT-S30-C38	35951	linear	AP013398	557356504	True	AP013398	Eukaryote
Uncultured Mediterranean phage uvMED DNA, complete genome, group G15, isolate: uvMED-CGR-U-MedDCM-OCT-S40-C42	35327	linear	AP013399	557356505	True	AP013399	Eukaryote
Uncultured Mediterranean phage uvMED DNA, complete genome, group G15, isolate: uvMED-CGR-U-MedDCM-OCT-S30-C37	36021	linear	AP013400	557356506	True	AP013400	Eukaryote
Uncultured Mediterranean phage uvMED DNA, complete genome, group G15, isolate: uvMED-CGR-U-MedDCM-OCT-S37-C49	35059	linear	AP013401	557356507	True	AP013401	Eukaryote
Uncultured Mediterranean phage uvMED DNA, complete genome, group G15, isolate: uvMED-CGR-U-MedDCM-OCT-S38-C27	38437	linear	AP013402	557356508	True	AP013402	Eukaryote
Uncultured Mediterranean phage uvMED DNA, complete genome, group G15, isolate: uvMED-CGR-U-MedDCM-OCT-S41-C7	42204	linear	AP013403	557356509	True	AP013403	Eukaryote
Uncultured Mediterranean phage uvMED DNA, complete genome, group G15, isolate: uvMED-CGR-U-MedDCM-OCT-S41-C82	32527	linear	AP013404	557356510	True	AP013404	Eukaryote
Uncultured Mediterranean phage uvMED DNA, complete genome, group G15, isolate: uvMED-CGR-U-MedDCM-OCT-S42-C63	35701	linear	AP013405	557356511	True	AP013405	Eukaryote
Uncultured Mediterranean phage uvMED DNA, complete genome, group G15, isolate: uvMED-CGR-U-MedDCM-OCT-S46-C34	37654	linear	AP013406	557356512	True	AP013406	Eukaryote
Uncultured Mediterranean phage uvMED DNA, complete genome, group G16, isolate: uvMED-CGR-C10-MedDCM-OCT-S30-C55	33778	linear	AP013407	557356513	True	AP013407	Eukaryote
Uncultured Mediterranean phage uvMED DNA, complete genome, group G16, isolate: uvMED-CGR-C105A-MedDCM-OCT-S27-C54	32954	linear	AP013408	557356514	True	AP013408	Eukaryote
Uncultured Mediterranean phage uvMED DNA, complete genome, group G16, isolate: uvMED-CGR-C105A-MedDCM-OCT-S28-C49	33014	linear	AP013409	557356515	True	AP013409	Eukaryote
Uncultured Mediterranean phage uvMED DNA, complete genome, group G16, isolate: uvMED-CGR-C107A-MedDCM-OCT-S27-C42	33517	linear	AP013410	557356516	True	AP013410	Eukaryote
Uncultured Mediterranean phage uvMED DNA, complete genome, group G16, isolate: uvMED-CGR-C108A-MedDCM-OCT-S29-C43	35248	linear	AP013411	557356517	True	AP013411	Eukaryote
Uncultured Mediterranean phage uvMED DNA, complete genome, group G16, isolate: uvMED-CGR-C10A-MedDCM-OCT-S46-C61	34630	linear	AP013412	557356518	True	AP013412	Eukaryote
Uncultured Mediterranean phage uvMED DNA, complete genome, group G16, isolate: uvMED-CGR-C48A-MedDCM-OCT-S28-C15	38738	linear	AP013413	557356519	True	AP013413	Eukaryote
Uncultured Mediterranean phage uvMED DNA, complete genome, group G16, isolate: uvMED-CGR-C48A-MedDCM-OCT-S29-C21	38744	linear	AP013414	557356520	True	AP013414	Eukaryote
Uncultured Mediterranean phage uvMED DNA, complete genome, group G16, isolate: uvMED-CGR-C48A-MedDCM-OCT-S37-C22	38732	linear	AP013415	557356521	True	AP013415	Eukaryote
Uncultured Mediterranean phage uvMED DNA, complete genome, group G16, isolate: uvMED-CGR-C48B-MedDCM-OCT-S24-C17	39033	linear	AP013416	557356522	True	AP013416	Eukaryote
Uncultured Mediterranean phage uvMED DNA, complete genome, group G16, isolate: uvMED-CGR-C48B-MedDCM-OCT-S26-C25	39029	linear	AP013417	557356523	True	AP013417	Eukaryote
Uncultured Mediterranean phage uvMED DNA, complete genome, group G16, isolate: uvMED-CGR-C48B-MedDCM-OCT-S30-C14	39355	linear	AP013418	557356524	True	AP013418	Eukaryote
Uncultured Mediterranean phage uvMED DNA, complete genome, group G16, isolate: uvMED-CGR-C48B-MedDCM-OCT-S41-C26	39021	linear	AP013419	557356525	True	AP013419	Eukaryote
Uncultured Mediterranean phage uvMED DNA, complete genome, group G16, isolate: uvMED-CGR-C48B-MedDCM-OCT-S42-C26	39355	linear	AP013420	557356526	True	AP013420	Eukaryote
Uncultured Mediterranean phage uvMED DNA, complete genome, group G16, isolate: uvMED-CGR-C49A-MedDCM-OCT-S31-C44	33800	linear	AP013421	557356527	True	AP013421	Eukaryote
Uncultured Mediterranean phage uvMED DNA, complete genome, group G16, isolate: uvMED-CGR-C53A-MedDCM-OCT-S26-C61	33654	linear	AP013422	557356528	True	AP013422	Eukaryote
Uncultured Mediterranean phage uvMED DNA, complete genome, group G16, isolate: uvMED-CGR-C53A-MedDCM-OCT-S34-C54	33719	linear	AP013423	557356529	True	AP013423	Eukaryote
Uncultured Mediterranean phage uvMED DNA, complete genome, group G16, isolate: uvMED-CGR-C55-MedDCM-OCT-S33-C61	33380	linear	AP013424	557356530	True	AP013424	Eukaryote
Uncultured Mediterranean phage uvMED DNA, complete genome, group G16, isolate: uvMED-CGR-C55A-MedDCM-OCT-S46-C84	32324	linear	AP013425	557356531	True	AP013425	Eukaryote
Uncultured Mediterranean phage uvMED DNA, complete genome, group G16, isolate: uvMED-CGR-C57-MedDCM-OCT-S27-C24	37925	linear	AP013426	557356532	True	AP013426	Eukaryote
Uncultured Mediterranean phage uvMED DNA, complete genome, group G16, isolate: uvMED-CGR-C57A-MedDCM-OCT-S25-C28	37523	linear	AP013427	557356533	True	AP013427	Eukaryote
Uncultured Mediterranean phage uvMED DNA, complete genome, group G16, isolate: uvMED-CGR-C57A-MedDCM-OCT-S39-C32	37260	linear	AP013428	557356534	True	AP013428	Eukaryote
Uncultured Mediterranean phage uvMED DNA, complete genome, group G16, isolate: uvMED-CGR-C58A-MedDCM-OCT-S43-C47	36215	linear	AP013429	557356535	True	AP013429	Eukaryote
Uncultured Mediterranean phage uvMED DNA, complete genome, group G16, isolate: uvMED-CGR-U-MedDCM-OCT-S25-C55	33980	linear	AP013430	557356536	True	AP013430	Eukaryote
Uncultured Mediterranean phage uvMED DNA, complete genome, group G16, isolate: uvMED-CGR-U-MedDCM-OCT-S25-C59	33433	linear	AP013431	557356537	True	AP013431	Eukaryote
Uncultured Mediterranean phage uvMED DNA, complete genome, group G16, isolate: uvMED-CGR-U-MedDCM-OCT-S25-C65	32358	linear	AP013432	557356538	True	AP013432	Eukaryote
Uncultured Mediterranean phage uvMED DNA, complete genome, group G16, isolate: uvMED-CGR-U-MedDCM-OCT-S27-C44	33438	linear	AP013433	557356539	True	AP013433	Eukaryote
Uncultured Mediterranean phage uvMED DNA, complete genome, group G16, isolate: uvMED-CGR-U-MedDCM-OCT-S32-C65	33848	linear	AP013434	557356540	True	AP013434	Eukaryote
Uncultured Mediterranean phage uvMED DNA, complete genome, group G16, isolate: uvMED-CGR-U-MedDCM-OCT-S37-C71	32562	linear	AP013435	557356541	True	AP013435	Eukaryote
Uncultured Mediterranean phage uvMED DNA, complete genome, group G17, isolate: uvMED-CGR-C100-MedDCM-OCT-S26-C29	38286	linear	AP013436	557356542	True	AP013436	Eukaryote
Uncultured Mediterranean phage uvMED DNA, complete genome, group G17, isolate: uvMED-CGR-C100-MedDCM-OCT-S33-C20	38257	linear	AP013437	557356543	True	AP013437	Eukaryote
Uncultured Mediterranean phage uvMED DNA, complete genome, group G17, isolate: uvMED-CGR-C113A-MedDCM-OCT-S35-C17	39689	linear	AP013438	557356544	True	AP013438	Eukaryote
Uncultured Mediterranean phage uvMED DNA, complete genome, group G17, isolate: uvMED-CGR-C18A-MedDCM-OCT-S41-C53	35581	linear	AP013439	557356545	True	AP013439	Eukaryote
Uncultured Mediterranean phage uvMED DNA, complete genome, group G17, isolate: uvMED-CGR-C19-MedDCM-OCT-S26-C54	34607	linear	AP013440	557356546	True	AP013440	Eukaryote
Uncultured Mediterranean phage uvMED DNA, complete genome, group G17, isolate: uvMED-CGR-C22-MedDCM-OCT-S33-C34	36710	linear	AP013441	557356547	True	AP013441	Eukaryote
Uncultured Mediterranean phage uvMED DNA, complete genome, group G17, isolate: uvMED-CGR-C22-MedDCM-OCT-S36-C18	39860	linear	AP013442	557356548	True	AP013442	Eukaryote
Uncultured Mediterranean phage uvMED DNA, complete genome, group G17, isolate: uvMED-CGR-C22C-MedDCM-OCT-S23-C7	39541	linear	AP013443	557356549	True	AP013443	Eukaryote
Uncultured Mediterranean phage uvMED DNA, complete genome, group G17, isolate: uvMED-CGR-C32A-MedDCM-OCT-S40-C23	37952	linear	AP013444	557356550	True	AP013444	Eukaryote
Uncultured Mediterranean phage uvMED DNA, complete genome, group G17, isolate: uvMED-CGR-C40-MedDCM-OCT-S28-C16	38622	linear	AP013445	557356551	True	AP013445	Eukaryote
Uncultured Mediterranean phage uvMED DNA, complete genome, group G17, isolate: uvMED-CGR-C66A-MedDCM-OCT-S24-C64	32224	linear	AP013446	557356552	True	AP013446	Eukaryote
Uncultured Mediterranean phage uvMED DNA, complete genome, group G17, isolate: uvMED-CGR-C66A-MedDCM-OCT-S28-C59	32109	linear	AP013447	557356553	True	AP013447	Eukaryote
Uncultured Mediterranean phage uvMED DNA, complete genome, group G17, isolate: uvMED-CGR-C66A-MedDCM-OCT-S29-C69	32115	linear	AP013448	557356554	True	AP013448	Eukaryote
Uncultured Mediterranean phage uvMED DNA, complete genome, group G17, isolate: uvMED-CGR-C66A-MedDCM-OCT-S35-C82	31277	linear	AP013449	557356555	True	AP013449	Eukaryote
Uncultured Mediterranean phage uvMED DNA, complete genome, group G17, isolate: uvMED-CGR-C66A-MedDCM-OCT-S36-C74	31599	linear	AP013450	557356556	True	AP013450	Eukaryote
Uncultured Mediterranean phage uvMED DNA, complete genome, group G17, isolate: uvMED-CGR-C66A-MedDCM-OCT-S40-C72	32174	linear	AP013451	557356557	True	AP013451	Eukaryote
Uncultured Mediterranean phage uvMED DNA, complete genome, group G17, isolate: uvMED-CGR-C66A-MedDCM-OCT-S44-C68	32153	linear	AP013452	557356558	True	AP013452	Eukaryote
Uncultured Mediterranean phage uvMED DNA, complete genome, group G17, isolate: uvMED-CGR-U-MedDCM-OCT-S28-C28	36835	linear	AP013453	557356559	True	AP013453	Eukaryote
Uncultured Mediterranean phage uvMED DNA, complete genome, group G17, isolate: uvMED-CGR-U-MedDCM-OCT-S33-C36	36627	linear	AP013454	557356560	True	AP013454	Eukaryote
Uncultured Mediterranean phage uvMED DNA, complete genome, group G17, isolate: uvMED-CGR-U-MedDCM-OCT-S38-C40	36284	linear	AP013455	557356561	True	AP013455	Eukaryote
Uncultured Mediterranean phage uvMED DNA, complete genome, group G17, isolate: uvMED-CGR-U-MedDCM-OCT-S23-C23	35468	linear	AP013456	557356562	True	AP013456	Eukaryote
Uncultured Mediterranean phage uvMED DNA, complete genome, group G17, isolate: uvMED-CGR-U-MedDCM-OCT-S28-C20	38351	linear	AP013457	557356563	True	AP013457	Eukaryote
Uncultured Mediterranean phage uvMED DNA, complete genome, group G17, isolate: uvMED-CGR-U-MedDCM-OCT-S32-C35	36898	linear	AP013458	557356564	True	AP013458	Eukaryote
Uncultured Mediterranean phage uvMED DNA, complete genome, group G17, isolate: uvMED-CGR-U-MedDCM-OCT-S39-C21	38825	linear	AP013459	557356565	True	AP013459	Eukaryote
Uncultured Mediterranean phage uvMED DNA, complete genome, group G17, isolate: uvMED-CGR-U-MedDCM-OCT-S40-C18	39004	linear	AP013460	557356566	True	AP013460	Eukaryote
Uncultured Mediterranean phage uvMED DNA, complete genome, group G18, isolate: uvMED-CGR-C29A-MedDCM-OCT-S24-C21	37755	linear	AP013461	557356567	True	AP013461	Eukaryote
Uncultured Mediterranean phage uvMED DNA, complete genome, group G18, isolate: uvMED-CGR-C29A-MedDCM-OCT-S33-C24	37729	linear	AP013462	557356568	True	AP013462	Eukaryote
Uncultured Mediterranean phage uvMED DNA, complete genome, group G18, isolate: uvMED-CGR-C29A-MedDCM-OCT-S42-C45	37449	linear	AP013463	557356569	True	AP013463	Eukaryote
Uncultured Mediterranean phage uvMED DNA, complete genome, group G18, isolate: uvMED-CGR-C51-MedDCM-OCT-S31-C32	35852	linear	AP013464	557356570	True	AP013464	Eukaryote
Uncultured Mediterranean phage uvMED DNA, complete genome, group G18, isolate: uvMED-CGR-C51-MedDCM-OCT-S32-C58	34958	linear	AP013465	557356571	True	AP013465	Eukaryote
Uncultured Mediterranean phage uvMED DNA, complete genome, group G18, isolate: uvMED-CGR-C51A-MedDCM-OCT-S38-C51	34951	linear	AP013466	557356572	True	AP013466	Eukaryote
Uncultured Mediterranean phage uvMED DNA, complete genome, group G18, isolate: uvMED-CGR-C51A-MedDCM-OCT-S42-C66	35241	linear	AP013468	557356574	True	AP013468	Eukaryote
Uncultured Mediterranean phage uvMED DNA, complete genome, group G18, isolate: uvMED-CGR-C56-MedDCM-OCT-S38-C52	34856	linear	AP013469	557356575	True	AP013469	Eukaryote
Uncultured Mediterranean phage uvMED DNA, complete genome, group G18, isolate: uvMED-CGR-C56A-MedDCM-OCT-S32-C59	34812	linear	AP013470	557356576	True	AP013470	Eukaryote
Uncultured Mediterranean phage uvMED DNA, complete genome, group G18, isolate: uvMED-CGR-C63A-MedDCM-OCT-S41-C57	35133	linear	AP013471	557356577	True	AP013471	Eukaryote
Uncultured Mediterranean phage uvMED DNA, complete genome, group G18, isolate: uvMED-CGR-C82-MedDCM-OCT-S25-C54	34001	linear	AP013472	557356578	True	AP013472	Eukaryote
Uncultured Mediterranean phage uvMED DNA, complete genome, group G18, isolate: uvMED-CGR-C82-MedDCM-OCT-S28-C40	34195	linear	AP013473	557356579	True	AP013473	Eukaryote
Uncultured Mediterranean phage uvMED DNA, complete genome, group G18, isolate: uvMED-CGR-C83-MedDCM-OCT-S23-C22	35480	linear	AP013474	557356580	True	AP013474	Eukaryote
Uncultured Mediterranean phage uvMED DNA, complete genome, group G18, isolate: uvMED-CGR-C83-MedDCM-OCT-S45-C54	34695	linear	AP013475	557356581	True	AP013475	Eukaryote
Uncultured Mediterranean phage uvMED DNA, complete genome, group G18, isolate: uvMED-CGR-U-MedDCM-OCT-S44-C63	32720	linear	AP013476	557356582	True	AP013476	Eukaryote
Uncultured Mediterranean phage uvMED DNA, complete genome, group G18, isolate: uvMED-CGR-U-MedDCM-OCT-S25-C14	39948	linear	AP013477	557356583	True	AP013477	Eukaryote
Uncultured Mediterranean phage uvMED DNA, complete genome, group G18, isolate: uvMED-CGR-U-MedDCM-OCT-S26-C62	33517	linear	AP013478	557356584	True	AP013478	Eukaryote
Uncultured Mediterranean phage uvMED DNA, complete genome, group G18, isolate: uvMED-CGR-U-MedDCM-OCT-S35-C8	42029	linear	AP013479	557356585	True	AP013479	Eukaryote
Uncultured Mediterranean phage uvMED DNA, complete genome, group G18, isolate: uvMED-CGR-U-MedDCM-OCT-S37-C50	34967	linear	AP013480	557356586	True	AP013480	Eukaryote
Uncultured Mediterranean phage uvMED DNA, complete genome, group G18, isolate: uvMED-CGR-U-MedDCM-OCT-S44-C29	36315	linear	AP013481	557356587	True	AP013481	Eukaryote
Uncultured Mediterranean phage uvMED DNA, complete genome, group G18, isolate: uvMED-CGR-U-MedDCM-OCT-S45-C47	36059	linear	AP013482	557356588	True	AP013482	Eukaryote
Uncultured Mediterranean phage uvMED DNA, complete genome, group G19, isolate: uvMED-CGR-C20A-MedDCM-OCT-S36-C79	30688	linear	AP013484	557356590	True	AP013484	Eukaryote
Uncultured Mediterranean phage uvMED DNA, complete genome, group G19, isolate: uvMED-CGR-C27-MedDCM-OCT-S28-C53	32761	linear	AP013485	557356591	True	AP013485	Eukaryote
Uncultured Mediterranean phage uvMED DNA, complete genome, group G19, isolate: uvMED-CGR-C30A-MedDCM-OCT-S29-C73	30646	linear	AP013486	557356592	True	AP013486	Eukaryote
Uncultured Mediterranean phage uvMED DNA, complete genome, group G19, isolate: uvMED-CGR-C30A-MedDCM-OCT-S33-C83	30420	linear	AP013487	557356593	True	AP013487	Eukaryote
Uncultured Mediterranean phage uvMED DNA, complete genome, group G19, isolate: uvMED-CGR-C30A-MedDCM-OCT-S38-C82	30646	linear	AP013488	557356594	True	AP013488	Eukaryote
Uncultured Mediterranean phage uvMED DNA, complete genome, group G19, isolate: uvMED-CGR-C30A-MedDCM-OCT-S45-C81	30420	linear	AP013489	557356595	True	AP013489	Eukaryote
Uncultured Mediterranean phage uvMED DNA, complete genome, group G19, isolate: uvMED-CGR-C30B-MedDCM-OCT-S46-C80	32503	linear	AP013490	557356596	True	AP013490	Eukaryote
Uncultured Mediterranean phage uvMED DNA, complete genome, group G19, isolate: uvMED-CGR-C37-MedDCM-OCT-S26-C78	31229	linear	AP013491	557356597	True	AP013491	Eukaryote
Uncultured Mediterranean phage uvMED DNA, complete genome, group G19, isolate: uvMED-CGR-C37-MedDCM-OCT-S29-C71	31008	linear	AP013492	557356598	True	AP013492	Eukaryote
Uncultured Mediterranean phage uvMED DNA, complete genome, group G19, isolate: uvMED-CGR-C37-MedDCM-OCT-S32-C82	31051	linear	AP013493	557356599	True	AP013493	Eukaryote
Uncultured Mediterranean phage uvMED DNA, complete genome, group G19, isolate: uvMED-CGR-C37-MedDCM-OCT-S44-C73	31247	linear	AP013494	557356600	True	AP013494	Eukaryote
Uncultured Mediterranean phage uvMED DNA, complete genome, group G19, isolate: uvMED-CGR-C39-MedDCM-OCT-S27-C61	32122	linear	AP013495	557356601	True	AP013495	Eukaryote
Uncultured Mediterranean phage uvMED DNA, complete genome, group G19, isolate: uvMED-CGR-C68A-MedDCM-OCT-S35-C79	31699	linear	AP013497	557356603	True	AP013497	Eukaryote
Uncultured Mediterranean phage uvMED DNA, complete genome, group G19, isolate: uvMED-CGR-C68A-MedDCM-OCT-S39-C84	31698	linear	AP013499	557356605	True	AP013499	Eukaryote
Uncultured Mediterranean phage uvMED DNA, complete genome, group G19, isolate: uvMED-CGR-C94-MedDCM-OCT-S26-C69	32406	linear	AP013500	557356606	True	AP013500	Eukaryote
Uncultured Mediterranean phage uvMED DNA, complete genome, group G19, isolate: uvMED-CGR-U-MedDCM-OCT-S24-C60	32364	linear	AP013501	557356607	True	AP013501	Eukaryote
Uncultured Mediterranean phage uvMED DNA, complete genome, group G2, isolate: uvMED-CGR-C14A-MedDCM-OCT-S29-C22	38569	linear	AP013503	557356609	True	AP013503	Eukaryote
Uncultured Mediterranean phage uvMED DNA, complete genome, group G2, isolate: uvMED-CGR-C14A-MedDCM-OCT-S34-C29	38514	linear	AP013504	557356610	True	AP013504	Eukaryote
Uncultured Mediterranean phage uvMED DNA, complete genome, group G2, isolate: uvMED-CGR-C14A-MedDCM-OCT-S38-C26	38511	linear	AP013505	557356611	True	AP013505	Eukaryote
Uncultured Mediterranean phage uvMED DNA, complete genome, group G2, isolate: uvMED-CGR-C14A-MedDCM-OCT-S42-C35	38411	linear	AP013506	557356612	True	AP013506	Eukaryote
Uncultured Mediterranean phage uvMED DNA, complete genome, group G2, isolate: uvMED-CGR-C15A-MedDCM-OCT-S31-C20	37334	linear	AP013507	557356613	True	AP013507	Eukaryote
Uncultured Mediterranean phage uvMED DNA, complete genome, group G2, isolate: uvMED-CGR-C15J-MedDCM-OCT-S37-C55	34694	linear	AP013508	557356614	True	AP013508	Eukaryote
Uncultured Mediterranean phage uvMED DNA, complete genome, group G2, isolate: uvMED-CGR-U-MedDCM-OCT-S35-C26	38614	linear	AP013509	557356615	True	AP013509	Eukaryote
Uncultured Mediterranean phage uvMED DNA, complete genome, group G20, isolate: uvMED-CGR-C101A-MedDCM-OCT-S30-C6	42335	linear	AP013510	557356616	True	AP013510	Eukaryote
Uncultured Mediterranean phage uvMED DNA, complete genome, group G21, isolate: uvMED-CGR-C117A-MedDCM-OCT-S32-C49	35735	linear	AP013511	557356617	True	AP013511	Eukaryote
Uncultured Mediterranean phage uvMED DNA, complete genome, group G21, isolate: uvMED-CGR-C84-MedDCM-OCT-S29-C65	32707	linear	AP013512	557356618	True	AP013512	Eukaryote
Uncultured Mediterranean phage uvMED DNA, complete genome, group G21, isolate: uvMED-CGR-C84-MedDCM-OCT-S32-C77	32413	linear	AP013513	557356619	True	AP013513	Eukaryote
Uncultured Mediterranean phage uvMED DNA, complete genome, group G21, isolate: uvMED-CGR-U-MedDCM-OCT-S26-C60	33701	linear	AP013514	557356620	True	AP013514	Eukaryote
Uncultured Mediterranean phage uvMED DNA, complete genome, group G21, isolate: uvMED-CGR-U-MedDCM-OCT-S27-C25	37598	linear	AP013515	557356621	True	AP013515	Eukaryote
Uncultured Mediterranean phage uvMED DNA, complete genome, group G21, isolate: uvMED-CGR-U-MedDCM-OCT-S29-C44	35191	linear	AP013516	557356622	True	AP013516	Eukaryote
Uncultured Mediterranean phage uvMED DNA, complete genome, group G21, isolate: uvMED-CGR-U-MedDCM-OCT-S30-C51	34524	linear	AP013517	557356623	True	AP013517	Eukaryote
Uncultured Mediterranean phage uvMED DNA, complete genome, group G21, isolate: uvMED-CGR-U-MedDCM-OCT-S31-C15	38921	linear	AP013518	557356624	True	AP013518	Eukaryote
Uncultured Mediterranean phage uvMED DNA, complete genome, group G21, isolate: uvMED-CGR-U-MedDCM-OCT-S31-C58	30352	linear	AP013519	557356625	True	AP013519	Eukaryote
Uncultured Mediterranean phage uvMED DNA, complete genome, group G21, isolate: uvMED-CGR-U-MedDCM-OCT-S39-C26	37934	linear	AP013520	557356626	True	AP013520	Eukaryote
Uncultured Mediterranean phage uvMED DNA, complete genome, group G21, isolate: uvMED-CGR-U-MedDCM-OCT-S42-C60	35858	linear	AP013521	557356627	True	AP013521	Eukaryote
Uncultured Mediterranean phage uvMED DNA, complete genome, group G3, isolate: uvMED-CGR-C5-MedDCM-OCT-S26-C7	41754	linear	AP013522	557356628	True	AP013522	Eukaryote
Uncultured Mediterranean phage uvMED DNA, complete genome, group G3, isolate: uvMED-CGR-C7-MedDCM-OCT-S37-C8	41982	linear	AP013523	557356629	True	AP013523	Eukaryote
Uncultured Mediterranean phage uvMED DNA, complete genome, group G3, isolate: uvMED-CGR-C7-MedDCM-OCT-S39-C15	39717	linear	AP013524	557356630	True	AP013524	Eukaryote
Uncultured Mediterranean phage uvMED DNA, complete genome, group G3, isolate: uvMED-CGR-C7A-MedDCM-OCT-S30-C5	42608	linear	AP013525	557356631	True	AP013525	Eukaryote
Uncultured Mediterranean phage uvMED DNA, complete genome, group G3, isolate: uvMED-CGR-C7A-MedDCM-OCT-S33-C3	42608	linear	AP013526	557356632	True	AP013526	Eukaryote
Uncultured Mediterranean phage uvMED DNA, complete genome, group G3, isolate: uvMED-CGR-C7A-MedDCM-OCT-S38-C7	42638	linear	AP013527	557356633	True	AP013527	Eukaryote
Uncultured Mediterranean phage uvMED DNA, complete genome, group G3, isolate: uvMED-CGR-C7A-MedDCM-OCT-S41-C23	39371	linear	AP013528	557356634	True	AP013528	Eukaryote
Uncultured Mediterranean phage uvMED DNA, complete genome, group G3, isolate: uvMED-CGR-U-MedDCM-OCT-S40-C13	40572	linear	AP013529	557356635	True	AP013529	Eukaryote
Uncultured Mediterranean phage uvMED DNA, complete genome, group G4, isolate: uvMED-CGR-C17C-MedDCM-OCT-S23-C4	42200	linear	AP013530	557356636	True	AP013530	Eukaryote
Uncultured Mediterranean phage uvMED DNA, complete genome, group G4, isolate: uvMED-CGR-C17C-MedDCM-OCT-S44-C5	42230	linear	AP013531	557356637	True	AP013531	Eukaryote
Uncultured Mediterranean phage uvMED DNA, complete genome, group G4, isolate: uvMED-CGR-U-MedDCM-OCT-S28-C22	38241	linear	AP013532	557356638	True	AP013532	Eukaryote
Uncultured Mediterranean phage uvMED DNA, complete genome, group G4, isolate: uvMED-CGR-U-MedDCM-OCT-S38-C34	37887	linear	AP013533	557356639	True	AP013533	Eukaryote
Uncultured Mediterranean phage uvMED DNA, complete genome, group G4, isolate: uvMED-CGR-U-MedDCM-OCT-S40-C11	41065	linear	AP013534	557356640	True	AP013534	Eukaryote
Uncultured Mediterranean phage uvMED DNA, complete genome, group G5, isolate: uvMED-CGR-U-MedDCM-OCT-S30-C10	40289	linear	AP013535	557356641	True	AP013535	Eukaryote
Uncultured Mediterranean phage uvMED DNA, complete genome, group G6, isolate: uvMED-CGR-C59-MedDCM-OCT-S39-C65	34130	linear	AP013536	557356642	True	AP013536	Eukaryote
Uncultured Mediterranean phage uvMED DNA, complete genome, group G6, isolate: uvMED-CGR-C59A-MedDCM-OCT-S34-C49	34933	linear	AP013537	557356643	True	AP013537	Eukaryote
Uncultured Mediterranean phage uvMED DNA, complete genome, group G7, isolate: uvMED-CGR-U-MedDCM-OCT-S45-C4	44705	linear	AP013538	557356644	True	AP013538	Eukaryote
Uncultured Mediterranean phage uvMED DNA, complete genome, group G7, isolate: uvMED-CGR-U-MedDCM-OCT-S28-C3	43444	linear	AP013539	557356645	True	AP013539	Eukaryote
Uncultured Mediterranean phage uvMED DNA, complete genome, group G8, isolate: uvMED-CGR-C62A-MedDCM-OCT-S28-C10	40866	linear	AP013540	557356646	True	AP013540	Eukaryote
Uncultured Mediterranean phage uvMED DNA, complete genome, group G8, isolate: uvMED-CGR-C97-MedDCM-OCT-S42-C7	42399	linear	AP013541	557356647	True	AP013541	Eukaryote
Uncultured Mediterranean phage uvMED DNA, complete genome, group G8, isolate: uvMED-CGR-U-MedDCM-OCT-S35-C6	42564	linear	AP013542	557356648	True	AP013542	Eukaryote
Uncultured Mediterranean phage uvMED DNA, complete genome, group G8, isolate: uvMED-CGR-U-MedDCM-OCT-S30-C28	37553	linear	AP013543	557356649	True	AP013543	Eukaryote
Uncultured Mediterranean phage uvMED DNA, complete genome, group G8, isolate: uvMED-CGR-U-MedDCM-OCT-S45-C18	40564	linear	AP013544	557356650	True	AP013544	Eukaryote
Uncultured Mediterranean phage uvMED DNA, complete genome, group G8, isolate: uvMED-CGR-U-MedDCM-OCT-S46-C10	41803	linear	AP013545	557356651	True	AP013545	Eukaryote
Uncultured Mediterranean phage uvMED DNA, complete genome, group G9, isolate: uvMED-CGR-C79-MedDCM-OCT-S37-C6	42127	linear	AP013546	557356652	True	AP013546	Eukaryote
Uncultured Mediterranean phage uvMED DNA, complete genome, group G9, isolate: uvMED-CGR-U-MedDCM-OCT-S31-C1	43552	linear	AP013547	557356653	True	AP013547	Eukaryote
Uncultured Mediterranean phage uvMED DNA, complete genome, group G9, isolate: uvMED-CGR-U-MedDCM-OCT-S38-C3	43698	linear	AP013548	557356654	True	AP013548	Eukaryote
Uncultured Mediterranean phage uvMED DNA, complete genome, group G9, isolate: uvMED-CGR-U-MedDCM-OCT-S39-C11	41987	linear	AP013549	557356655	True	AP013549	Eukaryote
HIV-1 isolate 97CNGX-9F from China, complete genome	8784	linear	AY008717	11761589	True	AY008717	Eukaryote
Camelpox virus CMS, complete genome	202205	linear	AY009089	19717929	True	AY009089	Eukaryote
Papaya ringspot virus strain W, complete genome	10323	linear	AY010722	14581404	True	AY010722	Eukaryote
Avian leukosis virus strain ev-3, complete genome	5842	linear	AY013304	13508438	True	AY013304	Eukaryote
Papaya ringspot virus W isolate CI, complete genome	10334	linear	AY027810	23680941	True	AY027810	Eukaryote
Simian immunodeficiency virus 17E-Fr, complete genome	10279	linear	AY033146	827101501	True	AY033146	Eukaryote
Bombyx mori densovirus 1, complete genome	5076	linear	AY033435	18025357	True	AY033435	Eukaryote
Pelargonium line pattern virus isolate CF, complete genome	3882	linear	AY038067	633999995	True	AY038067	Eukaryote
Hepatitis C virus isolate HCR6, complete genome	9611	linear	AY045702	15529110	True	AY045702	Eukaryote
HIV-l from Greece, complete genome	8909	linear	AY046058	17352343	True	AY046058	Eukaryote
HIV-1 isolate 01IN565.14 from India, complete genome	9054	linear	AY049711	23986250	True	AY049711	Eukaryote
HIV-1 isolate 00BWMO35.1 from Botswana, complete genome	9022	linear	AY074891	18643009	True	AY074891	Eukaryote
Hepatitis B virus isolate G25, complete genome	3185	circular	AY077735	19568077	True	AY077735	Eukaryote
Sheeppox virus NISKHI, complete genome	149662	linear	AY077834	21326696	True	AY077834	Eukaryote
Goatpox virus G20-LKV, complete genome	149723	linear	AY077836	21326698	True	AY077836	Eukaryote
HIV-1 isolate TH 13-26 from Thailand, complete genome	8797	linear	AY082968	19908407	True	AY082968	Eukaryote
Hepatitis B virus strain 1980Nic, complete genome	3161	circular	AY090456	22135706	True	AY090456	Eukaryote
HIV-1 isolate 95SN1795 from Senegal, complete genome	8803	linear	AY093603	29409294	True	AY093603	Eukaryote
HIV-1 isolate 95SN7808 from Senegal, complete genome	8777	linear	AY093604	29409304	True	AY093604	Eukaryote
HIV-1 isolate 96GH2911, complete genome	9039	linear	AY093605	29409314	True	AY093605	Eukaryote
Porcine circovirus 2 isolate CT-PCV-P6, complete genome	1768	circular	AY099500	21610542	True	AY099500	Eukaryote
Porcine circovirus 1 isolate CT-PCV-P7, complete genome	1759	circular	AY099501	21610536	True	AY099501	Eukaryote
Swine hepatitis E virus strain Arkell, complete genome	7255	linear	AY115488	24620202	True	AY115488	Eukaryote
HIV-1 isolate 97ZA003 from South Africa, complete genome	8967	linear	AY118165	32344835	True	AY118165	Eukaryote
HIV-1 isolate 97ZA009 from South Africa, complete genome	8967	linear	AY118166	32344845	True	AY118166	Eukaryote
Foxtail mosaic virus, complete genome	6161	linear	AY121833	24286047	True	AY121833	Eukaryote
Melon necrotic spot virus isolate Malfa5, complete genome	4271	linear	AY122286	22022499	True	AY122286	Eukaryote
Hepatitis B virus serotype adr, complete genome	3215	circular	AY123041	22415734	True	AY123041	Eukaryote
Norwalk-like virus isolate Bo/Dumfries/94/UK, complete genome	7311	linear	AY126474	113951962	True	AY126474	Eukaryote
Beet mild curly top virus - [Worland4], complete genome	2930	linear	AY134867	22901043	True	AY134867	Eukaryote
Potato leafroll virus, complete genome	5884	linear	AY138970	23953793	True	AY138970	Eukaryote
Hepatitis B virus, complete genome	3188	circular	AY148342	27542779	True	AY148342	Eukaryote
Sugarcane mosaic virus isolate SCMV-SD, complete genome	9596	linear	AY149118	24415606	True	AY149118	Eukaryote
PRRSV HB-1(sh)/2002, complete genome	15447	linear	AY150312	25361009	True	AY150312	Eukaryote
Porcine reproductive and respiratory syndrome virus isolate VR-2332, complete genome	15451	linear	AY150564	27549163	True	AY150564	Eukaryote
HIV-1 strain 98ZA445 clone d3 from South Africa, complete genome	8895	linear	AY158533	26245448	True	AY158533	Eukaryote
HIV-1 strain 98ZA502 clone 3 from South Africa, complete genome	8917	linear	AY158534	26245458	True	AY158534	Eukaryote
HIV-1 strain 98ZA528 clone 6 from South Africa, complete genome	8964	linear	AY158535	26245468	True	AY158535	Eukaryote
Simian immunodeficiency virus isolate SIVdrl1FAO, complete genome	9732	linear	AY159321	29367069	True	AY159321	Eukaryote
Simian immunodeficiency virus isolate SIVmnd5440, complete genome	9703	linear	AY159322	29367079	True	AY159322	Eukaryote
Hepatitis B virus clone S3.3, complete genome	3071	circular	AY161144	27466465	True	AY161144	Eukaryote
Hepatitis B virus clone S5.1 complete genome	3004	circular	AY161147	27466488	True	AY161147	Eukaryote
Papaya ringspot virus type P from Thailand, complete genome	10323	linear	AY162218	27542791	True	AY162218	Eukaryote
HIV-1 strain TV001 clone 8_5 subtype C from South Africa, complete genome	9781	linear	AY162223	26000253	True	AY162223	Eukaryote
HIV-1 strain TV002 clone 12/5_1 subtype C from South Africa, complete genome	9738	linear	AY162224	26000263	True	AY162224	Eukaryote
HIV-1 strain TV012 clone 2/1_4 subtype C from South Africa, complete genome	9691	linear	AY162225	26000273	True	AY162225	Eukaryote
HIV-1 isolate CM237 from Thailand, complete genome	9048	linear	AY167123	34811833	True	AY167123	Eukaryote
HIV-1 isolate 98CMA104 from Cameroon, complete genome	9243	linear	AY169802	37935839	True	AY169802	Eukaryote
HIV-1 isolate 96CMA102 from Cameroon, complete genome	9226	linear	AY169803	37935849	True	AY169803	Eukaryote
HIV-1 isolate 98CMABB212 from Cameroon, complete genome	9177	linear	AY169804	37935859	True	AY169804	Eukaryote
HIV-1 isolate 97US08692A from USA, complete genome	9147	linear	AY169805	37935869	True	AY169805	Eukaryote
HIV-1 isolate 96CMABB009 from Cameroon, complete genome	9158	linear	AY169806	37935879	True	AY169806	Eukaryote
HIV-1 isolate 98CMABB141 from Cameroon, complete genome	9182	linear	AY169807	37935889	True	AY169807	Eukaryote
HIV-1 isolate 98CMU5337 from Cameroon, complete genome	9171	linear	AY169808	37935899	True	AY169808	Eukaryote
HIV-1 isolate 97CMABB497 from Cameroon, complete genome	9199	linear	AY169809	37935909	True	AY169809	Eukaryote
HIV-1 isolate 96CMABB637 from Cameroon, complete genome	9225	linear	AY169810	37935919	True	AY169810	Eukaryote
HIV-1 isolate 98CMABB197 from Cameroon, complete genome	9072	linear	AY169811	37935929	True	AY169811	Eukaryote
HIV-1 isolate 98CMU2901 from Cameroon, complete genome	9110	linear	AY169812	37935939	True	AY169812	Eukaryote
HIV-1 isolate 97CMABB447 from Cameroon, complete genome	9161	linear	AY169813	37935949	True	AY169813	Eukaryote
HIV-1 isolate 99USTWLA from USA, complete genome	9186	linear	AY169814	37935959	True	AY169814	Eukaryote
HIV-1 isolate 99CMU4122 from Cameroon, complete genome	9186	linear	AY169815	37935968	True	AY169815	Eukaryote
HIV-1 isolate 98CMA105 from Cameroon, complete genome	9195	linear	AY169816	37935978	True	AY169816	Eukaryote
Simian immunodeficiency virus isolate SIVcpzCAM13, complete genome	9284	linear	AY169968	37727496	True	AY169968	Eukaryote
HIV-1 isolate BK132 from Thailand, complete genome	8996	linear	AY173951	29119255	True	AY173951	Eukaryote
HIV-1 isolate US1 from USA, complete genome	8997	linear	AY173952	29119265	True	AY173952	Eukaryote
HIV-1 isolate US2 from USA, complete genome	9018	linear	AY173953	29119275	True	AY173953	Eukaryote
HIV-1 isolate US3 from USA, complete genome	9042	linear	AY173954	29119285	True	AY173954	Eukaryote
HIV-1 isolate US4 from USA, complete genome	9027	linear	AY173955	29119295	True	AY173955	Eukaryote
HIV-1 isolate BZ167 from Brazil, complete genome	8940	linear	AY173956	29119305	True	AY173956	Eukaryote
HIV-1 isolate BZ163 from Brazil, complete genome	8991	linear	AY173958	29119324	True	AY173958	Eukaryote
Staphylococcus phage K, complete genome	127395	linear	AY176327	37729078	True	AY176327	Eukaryote
Turnip rosette virus, complete genome	4035	linear	AY177608	469477271	True	AY177608	Eukaryote
HIV-1 isolate CNHN24 subtype B-Thai from China, complete genome	9010	linear	AY180905	26518636	True	AY180905	Eukaryote
Human poliovirus 3 strain Sabin 3, complete genome	7432	linear	AY184221	27085400	True	AY184221	Eukaryote
Bean yellow mosaic virus isolate GDD, complete genome	9528	linear	AY192568	37780263	True	AY192568	Eukaryote
Hepatitis G virus isolate 765, complete genome	9309	linear	AY196904	28543032	True	AY196904	Eukaryote
Hepatitis B virus strain FMU002 complete genome	3063	circular	AY206373	30026313	True	AY206373	Eukaryote
Hepatitis B virus strain FMU016 complete genome	2993	circular	AY206387	30026414	True	AY206387	Eukaryote
Human endogenous retrovirus HCML-ARV, complete genome	8412	linear	AY208746	30026463	True	AY208746	Eukaryote
Hepatitis B virus isolate 21949, complete genome	3134	circular	AY217368	29124916	True	AY217368	Eukaryote
Hepatitis B virus isolate 7-2, complete genome	3032	circular	AY217370	29124925	True	AY217370	Eukaryote
Hepatitis B virus isolate 1-7, complete genome	3176	circular	AY217371	29123225	True	AY217371	Eukaryote
Hepatitis B virus isolate 2-1, complete genome	3072	circular	AY217372	29123229	True	AY217372	Eukaryote
Hepatitis B virus isolate Q2-10, complete genome	2990	circular	AY217377	29123245	True	AY217377	Eukaryote
Simian T-lymphotropic virus 3, complete genome	8917	linear	AY217650	37788286	True	AY217650	Eukaryote
Simian T-lymphotropic virus 3 strain CTO-NG409, complete genome	8918	linear	AY222339	34866743	True	AY222339	Eukaryote
Woolly monkey hepatitis B virus clone WMHBV-2, complete genome	3179	circular	AY226578	29501369	True	AY226578	Eukaryote
Turnip mosaic virus isolate CDN 1, complete genome	9844	linear	AY227024	33504661	True	AY227024	Eukaryote
HIV-1 genotype CRF05_DF isolate X492 from Spain, complete genome	8847	linear	AY227107	32189798	True	AY227107	Eukaryote
HIV-1 isolate 99ZATM10 from South Africa, complete genome	9748	linear	AY228556	37935580	True	AY228556	Eukaryote
HIV-1 isolate 01ZATM45 from South Africa, complete genome	9840	linear	AY228557	37909401	True	AY228557	Eukaryote
Hepatitis E virus from Morocco, complete genome	7212	linear	AY230202	29374143	True	AY230202	Eukaryote
Papaya ringspot virus Mex-VrPO, complete genome	10320	linear	AY231130	29469899	True	AY231130	Eukaryote
Hepatitis B virus isolate 12A, complete genome	3187	circular	AY236161	38374294	True	AY236161	Eukaryote
Hepatitis B virus isolate 29, complete genome	3169	circular	AY236163	38374303	True	AY236163	Eukaryote
HIV-1 isolate TZBFL0210-1-8 from Tanzania, complete genome	8987	linear	AY237165	34329998	True	AY237165	Eukaryote
HIV-1 isolate TZBFL0170-3-2 from Tanzania, complete genome	8984	linear	AY237166	34329999	True	AY237166	Eukaryote
HIV-1 isolate TZBFL0210-1-2 from Tanzania, complete genome	8959	linear	AY237167	34330003	True	AY237167	Eukaryote
Human calicivirus strain Mc37, complete genome	7541	linear	AY237415	44829133	True	AY237415	Eukaryote
Sapovirus Mc2, complete genome	7490	linear	AY237419	84394694	True	AY237419	Eukaryote
Sapovirus N21, complete genome	7429	linear	AY237423	380877189	True	AY237423	Eukaryote
Hepatitis B virus defective isolate FMU023, complete genome	2366	circular	AY238972	29150592	True	AY238972	Eukaryote
Grapevine virus A, complete genome	7378	linear	AY244516	33590464	True	AY244516	Eukaryote
Murine leukemia virus strain BM5eco, complete genome	8281	linear	AY252102	30908470	True	AY252102	Eukaryote
Rubella virus strain BRD-II, complete genome	9778	linear	AY258323	32442345	True	AY258323	Eukaryote
Bovine herpesvirus 5 strain SV507/99, complete genome	138390	linear	AY261359	33772319	True	AY261359	Eukaryote
African swine fever virus isolate Kenya 1950, complete genome	193886	linear	AY261360	33772320	True	AY261360	Eukaryote
African swine fever virus isolate Malawi Lil-20/1 (1983), complete genome	187612	linear	AY261361	33772321	True	AY261361	Eukaryote
African swine fever virus isolate Mkuzi 1979, complete genome	192714	linear	AY261362	33772322	True	AY261362	Eukaryote
African swine fever virus isolate Pretorisuskop/96/4, complete genome	190324	linear	AY261363	33772323	True	AY261363	Eukaryote
African swine fever virus isolate Tengani 62, complete genome	185689	linear	AY261364	33772324	True	AY261364	Eukaryote
African swine fever virus isolate Warmbaths, complete genome	190773	linear	AY261365	33772325	True	AY261365	Eukaryote
African swine fever virus isolate Warthog, complete genome	186528	linear	AY261366	33772326	True	AY261366	Eukaryote
Hepatitis D virus isolate TW2479-53, complete genome	1614	circular	AY261458	32528238	True	AY261458	Eukaryote
PRRSV HB-2(sh)/2002, complete genome	15398	linear	AY262352	31747018	True	AY262352	Eukaryote
HIV-1 clone pBD6.15 from Cameroon, complete genome	9774	linear	AY271690	33390878	True	AY271690	Eukaryote
Avian encephalomyelitis virus strain L2Z, complete genome	7059	linear	AY275539	35163957	True	AY275539	Eukaryote
SARS coronavirus GD01, complete genome	29757	linear	AY278489	31416290	True	AY278489	Eukaryote
Human poliovirus 2 isolate P2S/Mog66-4 (21043), complete genome	7439	linear	AY278551	30908785	True	AY278551	Eukaryote
Human poliovirus 1 isolate P1W/Bar65 (19276), complete genome	7436	linear	AY278553	30908795	True	AY278553	Eukaryote
Hepatitis B virus spliced variant D-6, complete genome	1171	linear	AY283776	30908989	True	AY283776	Eukaryote
Hepatitis B virus spliced variant D-9, complete genome	760	linear	AY283777	30908995	True	AY283777	Eukaryote
SARS coronavirus Sin2677, complete genome	29705	linear	AY283795	30468043	True	AY283795	Eukaryote
Porcine circovirus type 2 strain L, complete genome	1768	circular	AY288135	31075569	True	AY288135	Eukaryote
Deformed wing virus isolate PA, complete genome	10166	linear	AY292384	31540603	True	AY292384	Eukaryote
Hepatitis B virus strain Whutj-37, complete genome	3215	circular	AY293309	38147024	True	AY293309	Eukaryote
Human echovirus 13 strain Del Carmen complete genome	7410	linear	AY302539	34485417	True	AY302539	Eukaryote
Human echovirus 14 strain Tow complete genome	7450	linear	AY302540	34485419	True	AY302540	Eukaryote
Human echovirus 15 strain CH 96-51 complete genome	7437	linear	AY302541	34485421	True	AY302541	Eukaryote
Human echovirus 16 strain Harrington complete genome	7437	linear	AY302542	34485423	True	AY302542	Eukaryote
Human echovirus 17 strain CHHE-29 complete genome	7416	linear	AY302543	34485425	True	AY302543	Eukaryote
Human echovirus 19 strain Burke complete genome	7433	linear	AY302544	34485427	True	AY302544	Eukaryote
Human echovirus 2 strain Cornelis complete genome	7435	linear	AY302545	34485429	True	AY302545	Eukaryote
Human echovirus 20 strain JV-1 complete genome	7394	linear	AY302546	34485431	True	AY302546	Eukaryote
Human echovirus 21 strain Farina complete genome	7426	linear	AY302547	34485433	True	AY302547	Eukaryote
Human echovirus 24 strain DeCamp complete genome	7433	linear	AY302548	34485435	True	AY302548	Eukaryote
Human echovirus 25 strain JV-4 complete genome	7426	linear	AY302549	34485437	True	AY302549	Eukaryote
Human echovirus 26 strain Coronel complete genome	7424	linear	AY302550	34485439	True	AY302550	Eukaryote
Human echovirus 27 strain Bacon complete genome	7412	linear	AY302551	34485441	True	AY302551	Eukaryote
Human echovirus 29 strain JV-10 complete genome	7427	linear	AY302552	34485443	True	AY302552	Eukaryote
Human echovirus 3 strain Morrisey complete genome	7428	linear	AY302553	34485445	True	AY302553	Eukaryote
Human echovirus 31 strain Caldwell complete genome	7432	linear	AY302554	34485447	True	AY302554	Eukaryote
Human echovirus 32 strain PR-10 complete genome	7420	linear	AY302555	34485449	True	AY302555	Eukaryote
Human echovirus 33 strain Toluca-3 complete genome	7394	linear	AY302556	34485451	True	AY302556	Eukaryote
Human echovirus 4 strain Pesacek complete genome	7394	linear	AY302557	34485453	True	AY302557	Eukaryote
Human echovirus 6 strain D'Amori complete genome	7418	linear	AY302558	34485455	True	AY302558	Eukaryote
Human echovirus 7 strain Wallace complete genome	7427	linear	AY302559	34485457	True	AY302559	Eukaryote
Enterovirus 69 strain Toluca-1 complete genome	7411	linear	AY302560	34485459	True	AY302560	Eukaryote
Foot-and-mouth disease virus Asia 1 IND 63/72, complete genome	8167	linear	AY304994	32140992	True	AY304994	Eukaryote
HIV-1 isolate 1333_d2 from USA, complete genome	8773	linear	AY308760	32261260	True	AY308760	Eukaryote
HIV-1 isolate 1304_d31 from USA, complete genome	8826	linear	AY308762	32261280	True	AY308762	Eukaryote
Turnip crinkle virus isolate UK, complete genome	4053	linear	AY312063	32263858	True	AY312063	Eukaryote
Vaccinia virus strain Acambis clone 2000, complete genome	199234	linear	AY313847	38348858	True	AY313847	Eukaryote
Vaccinia virus strain Acambis clone 3, complete genome	197418	linear	AY313848	37551435	True	AY313848	Eukaryote
SARS coronavirus GD69, complete genome	29754	linear	AY313906	37960831	True	AY313906	Eukaryote
HIV-1 isolate WC10C-11 from USA, complete genome	8997	linear	AY314062	36365535	True	AY314062	Eukaryote
HIV-1 isolate WC10C-12 from USA, complete genome	8973	linear	AY314063	36365544	True	AY314063	Eukaryote
Human herpesvirus 5 strain Towne, complete genome	222047	linear	AY315197	124303521	True	AY315197	Eukaryote
Avian infectious bronchitis virus isolate BJ, complete genome	27733	linear	AY319651	33086799	True	AY319651	Eukaryote
HIV-1 isolate ML013-10-1986 from Kenya, complete genome	8996	linear	AY322184	39777373	True	AY322184	Eukaryote
HIV-1 isolate ML013-2-1997 from Kenya, complete genome	9082	linear	AY322185	39777383	True	AY322185	Eukaryote
HIV-1 isolate ML249-3-1997 from Kenya, complete genome	9100	linear	AY322187	39777393	True	AY322187	Eukaryote
HIV-1 isolate ML415-2-1997 from Kenya, complete genome	9087	linear	AY322189	39777403	True	AY322189	Eukaryote
HIV-1 isolate ML605-3-1997 from Kenya, complete genome	9164	linear	AY322190	39777413	True	AY322190	Eukaryote
HIV-1 isolate ML672-3-1997 from Kenya, complete genome	9086	linear	AY322191	39777423	True	AY322191	Eukaryote
HIV-1 isolate ML752-3-1997 from Kenya, complete genome	9082	linear	AY322193	39777433	True	AY322193	Eukaryote
Human papillomavirus type 71 isolate Qv21030, complete genome	8037	circular	AY330620	37622177	True	AY330620	Eukaryote
Human papillomavirus type 71 isolate Qv22945, complete genome	8031	circular	AY330622	37622193	True	AY330622	Eukaryote
Human papillomavirus type 71 isolate Qv23143, complete genome	8038	circular	AY330623	37622201	True	AY330623	Eukaryote
Hepatitis B virus isolate Happy complete genome	3182	circular	AY330915	33113457	True	AY330915	Eukaryote
Hepatitis B virus isolate Tbblack complete genome	3182	circular	AY330916	33113465	True	AY330916	Eukaryote
Hepatitis B virus isolate Crazywoman complete genome	3182	circular	AY330917	33113473	True	AY330917	Eukaryote
HIV-1 isolate 1001-09 from USA, complete genome	8796	linear	AY331283	37677763	True	AY331283	Eukaryote
HIV-1 isolate 1012-11 from USA, complete genome	8780	linear	AY331286	37677793	True	AY331286	Eukaryote
HIV-1 isolate 1013-07 from USA, complete genome	8767	linear	AY331288	37677813	True	AY331288	Eukaryote
HIV-1 isolate 1018-10 from USA, complete genome	8775	linear	AY331290	37677833	True	AY331290	Eukaryote
HIV-1 isolate 1057-09 from USA, complete genome	8772	linear	AY331293	37677863	True	AY331293	Eukaryote
HIV-1 isolate PRB959-05 from USA, complete genome	8785	linear	AY331297	37677903	True	AY331297	Eukaryote
HIV-1 isolate 1006-10 from USA, complete genome	8751	linear	AY332236	37681530	True	AY332236	Eukaryote
Foot-and-mouth disease virus O isolate O/NY00, complete genome	7731	linear	AY333431	37575129	True	AY333431	Eukaryote
Human adenovirus C serotype 5, complete genome	35934	linear	AY339865	33465830	True	AY339865	Eukaryote
Simian immunodeficiency virus SIVmus-01CM1085, complete genome	9420	linear	AY340700	37728000	True	AY340700	Eukaryote
Simian immunodeficiency virus SIVmon-99CMCML1, complete genome	9448	linear	AY340701	37728010	True	AY340701	Eukaryote
Equine arteritis virus isolate CW01, complete genome	12708	linear	AY349168	38230280	True	AY349168	Eukaryote
HIV-1 isolate SE8646 from Sweden, complete genome	9074	linear	AY352654	38679131	True	AY352654	Eukaryote
HIV-1 isolate SE9010 from Sweden, complete genome	9066	linear	AY352655	38679140	True	AY352655	Eukaryote
HIV-1 isolate UG035 from Uganda, complete genome	8989	linear	AY352656	38679148	True	AY352656	Eukaryote
HIV-1 isolate UG266 from Uganda, complete genome	8986	linear	AY352657	38679157	True	AY352657	Eukaryote
Zaire ebolavirus strain Zaire 1995, complete genome	18961	linear	AY354458	33860540	True	AY354458	Eukaryote
Foot-and-mouth disease virus O strain OMIII, complete genome	8083	linear	AY359854	33943915	True	AY359854	Eukaryote
Maize chlorotic dwarf virus strain Severe, complete genome	11784	linear	AY362551	38224696	True	AY362551	Eukaryote
Porcine reproductive and respiratory syndrome virus strain EuroPRRSV, complete genome	15047	linear	AY366525	38146324	True	AY366525	Eukaryote
Rupestris stem pitting-associated virus isolate RSPaV-PN, complete genome	8743	linear	AY368172	227018594	True	AY368172	Eukaryote
Rupestris stem pitting-associated virus strain Syrah, complete genome	8742	linear	AY368590	89892506	True	AY368590	Eukaryote
JC virus isolate 321A, complete genome	5121	circular	AY376831	40737560	True	AY376831	Eukaryote
Human papillomavirus type 93, complete genome	7450	circular	AY382778	37089393	True	AY382778	Eukaryote
Foot-and-mouth disease virus Asia1 strain YNBS/58, complete genome	8163	linear	AY390432	37223495	True	AY390432	Eukaryote
SARS coronavirus GZ02, complete genome	29760	linear	AY390556	41323719	True	AY390556	Eukaryote
SARS coronavirus GZ-B, complete genome	29640	linear	AY394978	37624321	True	AY394978	Eukaryote
SARS coronavirus HSZ2-A, complete genome	29699	linear	AY394983	37624326	True	AY394983	Eukaryote
SARS coronavirus HSZ-Bb, complete genome	29530	linear	AY394985	37624328	True	AY394985	Eukaryote
Human papillomavirus type 62 isolate Qv18091, complete genome	8092	circular	AY395706	39932599	True	AY395706	Eukaryote
Human coxsackievirus A2 strain Fleetwood, complete genome	7398	linear	AY421760	40068428	True	AY421760	Eukaryote
Human coxsackievirus A3 strain Olson, complete genome	7395	linear	AY421761	40068430	True	AY421761	Eukaryote
Human coxsackievirus A4 strain High Point, complete genome	7434	linear	AY421762	40068432	True	AY421762	Eukaryote
Human coxsackievirus A5 strain Swartz, complete genome	7400	linear	AY421763	40068434	True	AY421763	Eukaryote
Human coxsackievirus A6 strain Gdula, complete genome	7434	linear	AY421764	40068436	True	AY421764	Eukaryote
Human coxsackievirus A8 strain Donovan, complete genome	7396	linear	AY421766	40068440	True	AY421766	Eukaryote
Human coxsackievirus A10 strain Kowalik, complete genome	7409	linear	AY421767	40068442	True	AY421767	Eukaryote
Human coxsackievirus A12 strain Texas-12, complete genome	7404	linear	AY421768	40068444	True	AY421768	Eukaryote
Human coxsackievirus A14 strain G-14, complete genome	7415	linear	AY421769	40068446	True	AY421769	Eukaryote
HIV-1 isolate 671-00T103 from Netherlands, complete genome	9068	linear	AY423386	37725237	True	AY423386	Eukaryote
HIV-1 isolate 671-00T36 from Netherlands, complete genome	9359	linear	AY423387	37725247	True	AY423387	Eukaryote
Human enterovirus 68 strain Fermon, complete genome	7367	linear	AY426531	41019061	True	AY426531	Eukaryote
Swine vesicular disease virus strain HK'70, complete genome	7401	linear	AY429470	37993797	True	AY429470	Eukaryote
HIV-1 clone pWCML249 from Kenya, complete genome	9721	linear	AY445524	38326769	True	AY445524	Eukaryote
Beak and feather disease virus isolate AFG4-ZA, complete genome	1988	circular	AY450435	46558863	True	AY450435	Eukaryote
Beak and feather disease virus isolate BCL1-ZA, complete genome	1996	circular	AY450442	46558879	True	AY450442	Eukaryote
HIV-1 isolate 99UFRJ-1 from Brazil, complete genome	8767	linear	AY455778	45360138	True	AY455778	Eukaryote
HIV-1 isolate 94BR-RJ-97 from Brazil, complete genome	8962	linear	AY455779	45360148	True	AY455779	Eukaryote
HIV-1 isolate 99UFRJ-2 from Brazil, complete genome	9045	linear	AY455780	45360158	True	AY455780	Eukaryote
HIV-1 isolate 94BR-RJ-41 from Brazil, complete genome	8864	linear	AY455781	45360168	True	AY455781	Eukaryote
HIV-1 isolate 99UFRJ-16 from Brazil, complete genome	9002	linear	AY455782	45360178	True	AY455782	Eukaryote
HIV-1 isolate 99UFRJ-9 from Brazil, complete genome	9040	linear	AY455783	45360188	True	AY455783	Eukaryote
HIV-1 isolate 94BR-RJ-59 from Brazil, complete genome	8898	linear	AY455784	45360198	True	AY455784	Eukaryote
HIV-1 isolate 94UFRJ-58 from Brazil, complete genome	8898	linear	AY455785	45360208	True	AY455785	Eukaryote
Hepatitis C virus from Shanghai, complete genome	9577	linear	AY460204	38492204	True	AY460204	Eukaryote
Possum enterovirus W6, complete genome	7391	linear	AY462107	72394701	True	AY462107	Eukaryote
SARS coronavirus ShanghaiQXC1, complete genome	29592	linear	AY463059	40457433	True	AY463059	Eukaryote
SARS coronavirus ShanghaiQXC2, complete genome	29013	linear	AY463060	40457448	True	AY463060	Eukaryote
HIV-1 isolate C.ZA.1134MB from South Africa, complete genome	9071	linear	AY463217	38892598	True	AY463217	Eukaryote
HIV-1 isolate C.ZA.1176MB from South Africa, complete genome	9066	linear	AY463218	38892608	True	AY463218	Eukaryote
HIV-1 isolate C.ZA.1192M3M from South Africa, complete genome	9042	linear	AY463219	38892618	True	AY463219	Eukaryote
HIV-1 isolate C.ZA.1195MB from South Africa, complete genome	9105	linear	AY463220	38892627	True	AY463220	Eukaryote
HIV-1 isolate C.ZA.1210MB from South Africa, complete genome	9055	linear	AY463221	38892635	True	AY463221	Eukaryote
HIV-1 isolate C.ZA.1228MB from South Africa, complete genome	8990	linear	AY463222	38892644	True	AY463222	Eukaryote
HIV-1 isolate C.ZA.J54Ma from South Africa, complete genome	9117	linear	AY463223	38892653	True	AY463223	Eukaryote
HIV-1 isolate C.ZA.1162MB from South Africa, complete genome	9066	linear	AY463224	38892663	True	AY463224	Eukaryote
HIV-1 isolate C.ZA.1170MB from South Africa, complete genome	9037	linear	AY463225	38892670	True	AY463225	Eukaryote
HIV-1 isolate C.ZA.1217MB from South Africa, complete genome	9058	linear	AY463226	38892679	True	AY463226	Eukaryote
HIV-1 isolate C.ZA.1225MB from South Africa, complete genome	9061	linear	AY463227	38892688	True	AY463227	Eukaryote
HIV-1 isolate C.ZA.J38MA from South Africa, complete genome	8982	linear	AY463228	38892697	True	AY463228	Eukaryote
HIV-1 isolate C.ZA.1119MB from South Africa, complete genome	9063	linear	AY463229	38892707	True	AY463229	Eukaryote
HIV-1 isolate C.ZA.1165MB from South Africa, complete genome	9102	linear	AY463230	38892715	True	AY463230	Eukaryote
HIV-1 isolate C.ZA.1168MB from South Africa, complete genome	9101	linear	AY463231	38892725	True	AY463231	Eukaryote
HIV-1 isolate C.ZA.1171MB from South Africa, complete genome	9078	linear	AY463232	38892735	True	AY463232	Eukaryote
HIV-1 isolate C.ZA.1178MB from South Africa, complete genome	9085	linear	AY463233	38892745	True	AY463233	Eukaryote
HIV-1 isolate C.ZA.1197MB from South Africa, complete genome	9041	linear	AY463234	38892753	True	AY463234	Eukaryote
HIV-1 isolate C.ZA.2004MB from South Africa, complete genome	7667	linear	AY463235	38892763	True	AY463235	Eukaryote
HIV-1 isolate C.ZA.1214MB from South Africa, complete genome	9083	linear	AY463236	38892772	True	AY463236	Eukaryote
HIV-1 isolate C.ZA.2134MB from South Africa, complete genome	9089	linear	AY463237	38892782	True	AY463237	Eukaryote
Rabbitpox virus, complete genome	197731	linear	AY484669	44971363	True	AY484669	Eukaryote
Ross' goose hepatitis B virus, complete genome	3012	circular	AY494849	40786830	True	AY494849	Eukaryote
Duck hepatitis B virus, complete genome	3024	circular	AY494850	40786836	True	AY494850	Eukaryote
Duck hepatitis B virus, complete genome	3024	circular	AY494851	40786842	True	AY494851	Eukaryote
Sheldgoose hepatitis B virus, complete genome	3018	circular	AY494852	40786848	True	AY494852	Eukaryote
HIV-1 isolate 03RU20-06-13 from Russia, complete genome	9159	linear	AY500393	41353551	True	AY500393	Eukaryote
B19 virus isolate NAN, complete genome	5595	linear	AY504945	40950032	True	AY504945	Eukaryote
Bovine enterovirus type 2 strain PS87, complete genome	7426	linear	AY508696	46254770	True	AY508696	Eukaryote
Bovine enterovirus type 2 strain 3A, complete genome	7450	linear	AY508697	46254772	True	AY508697	Eukaryote
HIV-2 isolate MCR35, complete genome	9588	linear	AY509260	41056785	True	AY509260	Eukaryote
Pepino mosaic virus strain US2, complete genome	6410	linear	AY509927	46093918	True	AY509927	Eukaryote
Gallid herpesvirus 2 clone Md11BAC replication intermediate, complete genome	170950	circular	AY510475	41387571	True	AY510475	Eukaryote
Infectious bronchitis virus serotype California 99, complete genome	27693	linear	AY514485	41324068	True	AY514485	Eukaryote
Avian encephalomyelitis virus strain van Reokel, complete genome	7046	linear	AY517471	41387692	True	AY517471	Eukaryote
Human group 1 coronavirus associated with pneumonia, complete genome	27555	linear	AY518894	46369870	True	AY518894	Eukaryote
Simian immunodeficiency virus strain SIVdebCM40 from Cameroon, complete genome	9227	linear	AY523865	49887106	True	AY523865	Eukaryote
Simian immunodeficiency virus strain SIVdebCM5 from Cameroon, complete genome	9158	linear	AY523866	49887118	True	AY523866	Eukaryote
Simian immunodeficiency virus strain SIVsyk-KE51 from Kenya, complete genome	9068	linear	AY523867	49887132	True	AY523867	Eukaryote
Macaca fuscata rhadinovirus, complete genome	131217	linear	AY528864	46519329	True	AY528864	Eukaryote
Simian adenovirus 22 strain ATCC VR-591, complete genome	36462	linear	AY530876	41763965	True	AY530876	Eukaryote
Simian adenovirus 23 strain ATCC VR-592, complete genome	36604	linear	AY530877	41764021	True	AY530877	Eukaryote
Simian adenovirus 24 strain ATCC VR-593, complete genome	36535	linear	AY530878	41764064	True	AY530878	Eukaryote
HIV-2 isolate 96FR12034 from France, complete genome	9607	linear	AY530889	47680175	True	AY530889	Eukaryote
HIV-1 isolate LTG0218 clone 30 from China, complete genome	9682	linear	AY531116	47060056	True	AY531116	Eukaryote
Rock bream iridovirus strain RBIV-KOR-TY1 from South Korea, complete genome	112080	circular	AY532606	50237482	True	AY532606	Eukaryote
HIV-1 isolate 02CM-DJO0131 from Cameroon, complete genome	8938	linear	AY532635	47027387	True	AY532635	Eukaryote
HIV-1 isolate EE0359 from Estonia, complete genome	9262	linear	AY535659	46243153	True	AY535659	Eukaryote
HIV-1 isolate EE0369 from Estonia, complete genome	9229	linear	AY535660	46243163	True	AY535660	Eukaryote
HIV-1 isolate CH3 from Chile, complete genome	8967	linear	AY536233	47118209	True	AY536233	Eukaryote
HIV-1 isolate CH6 from Chile, complete genome	8927	linear	AY536234	47118219	True	AY536234	Eukaryote
HIV-1 isolate CH12 from Chile, complete genome	8970	linear	AY536235	47118239	True	AY536235	Eukaryote
HIV-1 isolate V62 from Venezuela, complete genome	8937	linear	AY536236	47118229	True	AY536236	Eukaryote
HIV-1 isolate R140 from Argentina, complete genome	8767	linear	AY536237	47118249	True	AY536237	Eukaryote
HIV-1 isolate X1241 from Argentina, complete genome	8760	linear	AY536238	47118259	True	AY536238	Eukaryote
JC virus isolate SA28_03 genotype 3A, complete genome	5089	circular	AY536242	47078355	True	AY536242	Eukaryote
JC virus isolate SA27_03 genotype 2, complete genome	5107	circular	AY536243	47078362	True	AY536243	Eukaryote
SARS coronavirus isolate HC/SZ/79/03, complete genome	29723	linear	AY545914	42563748	True	AY545914	Eukaryote
SARS coronavirus isolate HC/GZ/32/03, complete genome	29737	linear	AY545918	42563755	True	AY545918	Eukaryote
Tobacco necrosis virus A, complete genome	3682	linear	AY546104	50059153	True	AY546104	Eukaryote
Human herpesvirus 3 strain MSP, complete genome	124883	linear	AY548170	46981482	True	AY548170	Eukaryote
Beet curly top virus isolate spinach 3, complete genome	2925	circular	AY548948	46254384	True	AY548948	Eukaryote
Enterovirus 74 strain USA/CA75-10213, complete genome	7410	linear	AY556057	49425036	True	AY556057	Eukaryote
Enterovirus 75 strain USA/OK85-10362, complete genome	7429	linear	AY556070	49425062	True	AY556070	Eukaryote
SARS coronavirus Sin852, complete genome	29670	linear	AY559082	45644996	True	AY559082	Eukaryote
SARS coronavirus Sin849, complete genome	29661	linear	AY559086	45645003	True	AY559086	Eukaryote
SARS coronavirus SinP2, complete genome	29717	linear	AY559089	45645010	True	AY559089	Eukaryote
SARS coronavirus SinP4, complete genome	29710	linear	AY559091	45645016	True	AY559091	Eukaryote
SARS coronavirus Sin845, complete genome	29712	linear	AY559093	45645019	True	AY559093	Eukaryote
SARS coronavirus Sin846, complete genome	29577	linear	AY559094	45645021	True	AY559094	Eukaryote
SARS coronavirus Sin847, complete genome	29719	linear	AY559095	45645022	True	AY559095	Eukaryote
HIV-1 isolate 98USHVTN1925c1 from USA, complete genome	8934	linear	AY560107	49472921	True	AY560107	Eukaryote
HIV-1 isolate 98USHVTN3605c9 from USA, complete genome	8886	linear	AY560108	49472931	True	AY560108	Eukaryote
HIV-1 isolate 98USHVTN8229c6 from USA, complete genome	8892	linear	AY560109	49472940	True	AY560109	Eukaryote
HIV-1 isolate 98USHVTN941c1 from USA, complete genome	8908	linear	AY560110	49472948	True	AY560110	Eukaryote
Feline calicivirus isolate UTCVM-NH1, complete genome	7683	linear	AY560113	49458053	True	AY560113	Eukaryote
Feline calicivirus isolate UTCVM-NH2, complete genome	7690	linear	AY560114	49458057	True	AY560114	Eukaryote
Feline calicivirus isolate UTCVM-NH3, complete genome	7693	linear	AY560115	49458061	True	AY560115	Eukaryote
Feline calicivirus isolate UTCVM-H1, complete genome	7685	linear	AY560116	49458065	True	AY560116	Eukaryote
Feline calicivirus isolate UTCVM-H2, complete genome	7678	linear	AY560117	49458069	True	AY560117	Eukaryote
Feline calicivirus isolate USDA, complete genome	7681	linear	AY560118	49458073	True	AY560118	Eukaryote
Human poliovirus 1 strain Brunhilde, complete genome	7445	linear	AY560657	45272498	True	AY560657	Eukaryote
Newcastle disease virus isolate cockatoo/Indonesia/14698/90, complete genome	15192	linear	AY562985	45511204	True	AY562985	Eukaryote
Human T-lymphotropic virus 1, complete genome	8383	linear	AY563953	50404472	True	AY563953	Eukaryote
Human T-lymphotropic virus 1 strain BRRP438, complete genome	8883	linear	AY563954	50404473	True	AY563954	Eukaryote
Sugarcane mosaic virus isolate SCMV-SX, complete genome	9596	linear	AY569692	45774601	True	AY569692	Eukaryote
Odontoglossum ringspot virus strain Taiwan, complete genome	6612	linear	AY571290	46309859	True	AY571290	Eukaryote
SARS coronavirus civet007, complete genome	29540	linear	AY572034	51475451	True	AY572034	Eukaryote
SARS coronavirus civet010, complete genome	29518	linear	AY572035	51475465	True	AY572035	Eukaryote
Hepatitis E virus clone pSHEV-3, complete genome	7257	linear	AY575859	48249504	True	AY575859	Eukaryote
Tomato bushy stunt virus, complete genome	4766	linear	AY579432	49616855	True	AY579432	Eukaryote
Avian pneumovirus from USA, complete genome	13134	linear	AY579780	49246208	True	AY579780	Eukaryote
Human coronavirus OC43 serotype OC43-Paris, complete genome	30744	linear	AY585229	50844477	True	AY585229	Eukaryote
HIV-1 isolate C.ZA.1157M3M from South Africa, complete genome	9030	linear	AY585266	46486645	True	AY585266	Eukaryote
HIV-1 isolate CU76 from Cuba, complete genome	8945	linear	AY586540	51950709	True	AY586540	Eukaryote
HIV-1 isolate CU14 from Cuba, complete genome	8866	linear	AY586541	51950719	True	AY586541	Eukaryote
HIV-1 isolate Cu19 from Cuba, complete genome	9056	linear	AY586542	164415856	True	AY586542	Eukaryote
HIV-1 isolate Cu43 from Cuba, complete genome	9032	linear	AY586543	164415862	True	AY586543	Eukaryote
HIV-1 isolate R77 from Cuba, complete genome	9071	linear	AY586544	164415871	True	AY586544	Eukaryote
HIV-1 isolate Cu103 from Cuba, complete genome	8935	linear	AY586545	164415878	True	AY586545	Eukaryote
HIV-1 isolate Cu100 from Cuba, complete genome	9008	linear	AY586546	51950769	True	AY586546	Eukaryote
HIV-1 isolate Cu74 from Cuba, complete genome	9098	linear	AY586547	164415884	True	AY586547	Eukaryote
HIV-1 isolate Cu85 from Cuba, complete genome	9093	linear	AY586548	164415889	True	AY586548	Eukaryote
HIV-1 isolate Cu87 from Cuba, complete genome	9185	linear	AY586549	164415898	True	AY586549	Eukaryote
HIV-1 isolate CU38 from Cuba, complete genome	8693	linear	AY588970	52421736	True	AY588970	Eukaryote
HIV-1 isolate CU29 from Cuba, complete genome	9098	linear	AY588971	52421746	True	AY588971	Eukaryote
Simian T-lymphotropic virus 1 isolate MarB43, complete genome	9107	linear	AY590142	52222126	True	AY590142	Eukaryote
Avian pneumovirus strain Colorado, complete genome	14150	linear	AY590688	50898282	True	AY590688	Eukaryote
Foot-and-mouth disease virus A isolate a12valle 119 iso20, complete genome	8204	linear	AY593752	46810760	True	AY593752	Eukaryote
Foot-and-mouth disease virus A isolate a15thailand iso43, complete genome	8192	linear	AY593755	46810766	True	AY593755	Eukaryote
Foot-and-mouth disease virus A isolate a16belem iso80, complete genome	8114	linear	AY593756	46810768	True	AY593756	Eukaryote
Foot-and-mouth disease virus A isolate a18zulia iso40, complete genome	8204	linear	AY593758	46810772	True	AY593758	Eukaryote
Foot-and-mouth disease virus A isolate a1bayern iso41, complete genome	8168	linear	AY593759	46810774	True	AY593759	Eukaryote
Foot-and-mouth disease virus A isolate a20ussr iso10, complete genome	8152	linear	AY593760	46810776	True	AY593760	Eukaryote
Foot-and-mouth disease virus A isolate a21kenya iso77, complete genome	8161	linear	AY593761	46810778	True	AY593761	Eukaryote
Foot-and-mouth disease virus A isolate a22turkey iso66, complete genome	8202	linear	AY593765	46810786	True	AY593765	Eukaryote
Foot-and-mouth disease virus A isolate a23kenya iso8, complete genome	8202	linear	AY593766	46810788	True	AY593766	Eukaryote
Foot-and-mouth disease virus A isolate a24 argentina iso9, complete genome	8195	linear	AY593767	46810790	True	AY593767	Eukaryote
Foot-and-mouth disease virus A isolate a24cruzeiro iso71, complete genome	8156	linear	AY593768	46810792	True	AY593768	Eukaryote
Foot-and-mouth disease virus A isolate a25 argentina iso38, complete genome	8135	linear	AY593769	46810794	True	AY593769	Eukaryote
Foot-and-mouth disease virus A isolate a26arg iso74, complete genome	8115	linear	AY593770	46810796	True	AY593770	Eukaryote
Foot-and-mouth disease virus A isolate a27columbia iso78, complete genome	8200	linear	AY593771	46810798	True	AY593771	Eukaryote
Foot-and-mouth disease virus A isolate a28 Turkey iso44, complete genome	8158	linear	AY593772	46810800	True	AY593772	Eukaryote
Foot-and-mouth disease virus A isolate a32ven iso36, complete genome	8211	linear	AY593775	46810806	True	AY593775	Eukaryote
Foot-and-mouth disease virus A isolate a3mecklenburg iso81, complete genome	8157	linear	AY593776	46810808	True	AY593776	Eukaryote
Foot-and-mouth disease virus A isolate a4wg iso72, complete genome	8173	linear	AY593779	46810814	True	AY593779	Eukaryote
Foot-and-mouth disease virus A isolate a argentina 2000 iso104, complete genome	8200	linear	AY593782	46810820	True	AY593782	Eukaryote
Foot-and-mouth disease virus A isolate abrazil iso67, complete genome	8217	linear	AY593788	46810832	True	AY593788	Eukaryote
Foot-and-mouth disease virus A isolate airan iso105, complete genome	8280	linear	AY593791	46810838	True	AY593791	Eukaryote
Foot-and-mouth disease virus A isolate aparma iso55, complete genome	8198	linear	AY593792	46810840	True	AY593792	Eukaryote
Foot-and-mouth disease virus A isolate aphilippines iso50, complete genome	8203	linear	AY593793	46810842	True	AY593793	Eukaryote
Foot-and-mouth disease virus A isolate asabana iso68, complete genome	8201	linear	AY593794	46810844	True	AY593794	Eukaryote
Foot-and-mouth disease virus Asia 1 isolate asia1-1pak iso3, complete genome	8186	linear	AY593795	46810846	True	AY593795	Eukaryote
Foot-and-mouth disease virus Asia 1 isolate asia1-2isrl3-63 iso6, complete genome	8192	linear	AY593796	46810848	True	AY593796	Eukaryote
Foot-and-mouth disease virus Asia 1 isolate asia1-3kimron iso61, complete genome	8141	linear	AY593797	46810850	True	AY593797	Eukaryote
Foot-and-mouth disease virus A isolate A uruguay 2001 iso98, complete genome	8201	linear	AY593802	46810860	True	AY593802	Eukaryote
Foot-and-mouth disease virus A isolate avenceslau iso70, complete genome	8199	linear	AY593803	46810862	True	AY593803	Eukaryote
Foot-and-mouth disease virus C1 isolate c1noville iso56, complete genome	8150	linear	AY593804	46810864	True	AY593804	Eukaryote
Foot-and-mouth disease virus C3 isolate c3ind iso19, complete genome	8183	linear	AY593806	46810868	True	AY593806	Eukaryote
Foot-and-mouth disease virus C4 isolate C4 Tierra del Fuego iso2, complete genome	8188	linear	AY593808	46810872	True	AY593808	Eukaryote
Foot-and-mouth disease virus C5 isolate c5arg iso60, complete genome	8191	linear	AY593809	46810874	True	AY593809	Eukaryote
Foot-and-mouth disease virus C isolate cwald iso32, complete genome	8110	linear	AY593810	46810876	True	AY593810	Eukaryote
Foot-and-mouth disease virus O isolate o10phil76 iso76, complete genome	8201	linear	AY593812	46810880	True	AY593812	Eukaryote
Foot-and-mouth disease virus O isolate o11indonesia iso52, complete genome	8111	linear	AY593813	46810882	True	AY593813	Eukaryote
Foot-and-mouth disease virus O isolate o1caseros iso35, complete genome	8204	linear	AY593821	46810898	True	AY593821	Eukaryote
Foot-and-mouth disease virus O isolate o1manisa iso87, complete genome	8206	linear	AY593823	46810902	True	AY593823	Eukaryote
Foot-and-mouth disease virus O isolate o1valle iso64, complete genome	8159	linear	AY593825	46810906	True	AY593825	Eukaryote
Foot-and-mouth disease virus O isolate o2brescia iso17, complete genome	8166	linear	AY593826	46810908	True	AY593826	Eukaryote
Foot-and-mouth disease virus O isolate o3venezuela iso15, complete genome	8169	linear	AY593827	46810910	True	AY593827	Eukaryote
Foot-and-mouth disease virus O isolate o5india iso34, complete genome	8157	linear	AY593828	46810912	True	AY593828	Eukaryote
Foot-and-mouth disease virus O isolate o6pirbright iso58, complete genome	8201	linear	AY593829	46810914	True	AY593829	Eukaryote
Foot-and-mouth disease virus O isolate orey-iran iso53, complete genome	8198	linear	AY593834	46810924	True	AY593834	Eukaryote
Foot-and-mouth disease virus SAT 1 isolate sat1-1bech iso30, complete genome	8173	linear	AY593838	46810932	True	AY593838	Eukaryote
Foot-and-mouth disease virus SAT 1 isolate sat1-20 iso11, complete genome	8141	linear	AY593839	46810934	True	AY593839	Eukaryote
Foot-and-mouth disease virus SAT 1 isolate sat1-3swa iso14, complete genome	8179	linear	AY593840	46810936	True	AY593840	Eukaryote
Foot-and-mouth disease virus SAT 1 isolate sat1-4srhod iso24, complete genome	8177	linear	AY593841	46810938	True	AY593841	Eukaryote
Foot-and-mouth disease virus SAT 1 isolate sat1-5sa iso13, complete genome	8176	linear	AY593842	46810940	True	AY593842	Eukaryote
Foot-and-mouth disease virus SAT 1 isolate sat1-6swa iso16, complete genome	8180	linear	AY593843	46810942	True	AY593843	Eukaryote
Foot-and-mouth disease virus SAT 1 isolate sat1-7isrl iso12, complete genome	8190	linear	AY593844	46810944	True	AY593844	Eukaryote
Foot-and-mouth disease virus SAT 1 isolate sat1bot iso47, complete genome	8175	linear	AY593845	46810946	True	AY593845	Eukaryote
Foot-and-mouth disease virus SAT 1 isolate sat1rhod iso33, complete genome	8133	linear	AY593846	46810948	True	AY593846	Eukaryote
Foot-and-mouth disease virus SAT 2 isolate sat2-1rhod iso26, complete genome	8119	linear	AY593847	46810950	True	AY593847	Eukaryote
Foot-and-mouth disease virus SAT 2 isolate sat2-2 iso25, complete genome	8135	linear	AY593848	46810952	True	AY593848	Eukaryote
Foot-and-mouth disease virus SAT 2 isolate sat2-3kenya-21, complete genome	8203	linear	AY593849	46810954	True	AY593849	Eukaryote
Foot-and-mouth disease virus SAT 3 isolate sat3-2sa iso27, complete genome	8170	linear	AY593850	46810956	True	AY593850	Eukaryote
Foot-and-mouth disease virus SAT 3 isolate sat3-3kenya iso22, complete genome	8164	linear	AY593852	46810960	True	AY593852	Eukaryote
Foot-and-mouth disease virus SAT 3 isolate sat3-4bech iso23, complete genome	8131	linear	AY593853	46810962	True	AY593853	Eukaryote
Swine hepatitis E virus strain swCH25, complete genome	7270	linear	AY594199	46850001	True	AY594199	Eukaryote
Human adenovirus type 4 strain RI-67, complete genome	35990	linear	AY594253	51173196	True	AY594253	Eukaryote
Human adenovirus type 3 strain GB, complete genome	35345	linear	AY599834	57115749	True	AY599834	Eukaryote
Feline immunodeficiency virus isolate FIV-C36, complete genome	9466	linear	AY600517	47176917	True	AY600517	Eukaryote
Human adenovirus type 21 strain AV-1645, complete genome	35382	linear	AY601633	57115934	True	AY601633	Eukaryote
Human adenovirus type 16 strain ch. 79, complete genome	35522	linear	AY601636	57116031	True	AY601636	Eukaryote
Vaccinia virus strain Acambis 3000 Modified Virus Ankara (MVA), complete genome	166722	linear	AY603355	47088326	True	AY603355	Eukaryote
Sapovirus C12, complete genome	7476	linear	AY603425	51243518	True	AY603425	Eukaryote
HIV-1 isolate PT2695 from Portugal, complete genome	9655	linear	AY612637	51980229	True	AY612637	Eukaryote
Dengue virus type 4 strain ThD4_0017_97, complete genome	10653	linear	AY618989	53653744	True	AY618989	Eukaryote
HIV-1 clone pCMO2.3 from Cameroon, complete genome	9868	linear	AY618998	51599129	True	AY618998	Eukaryote
Small anellovirus 1, complete genome	2249	linear	AY622908	52854165	True	AY622908	Eukaryote
HIV-1 clone pCMO2.5 from Cameroon, complete genome	9860	linear	AY623602	51599138	True	AY623602	Eukaryote
BK polyomavirus isolate BKV HC-u2, complete genome	5092	circular	AY628234	48869447	True	AY628234	Eukaryote
Iguape virus strain SPAn 71686, complete genome	10922	linear	AY632538	226374364	True	AY632538	Eukaryote
Rocio virus strain SPH 34675, complete genome	10794	linear	AY632542	226534288	True	AY632542	Eukaryote
Hepatitis delta virus isolate IR-1, complete genome	1676	linear	AY633627	53801421	True	AY633627	Eukaryote
Avian pneumovirus strain LAH A, complete genome	13373	linear	AY640317	49823134	True	AY640317	Eukaryote
Avian infectious bronchitis virus isolate Peafowl/GD/KQ6/2003, complete genome	27434	linear	AY641576	50082761	True	AY641576	Eukaryote
Hepatitis A virus strain SLF88, complete genome	7414	linear	AY644670	50295436	True	AY644670	Eukaryote
Hepatitis A virus isolate CF53/Berne, complete genome	7426	linear	AY644676	52789965	True	AY644676	Eukaryote
Avian infectious bronchitis virus partridge/GD/S14/2003, complete genome	27503	linear	AY646283	50235229	True	AY646283	Eukaryote
Classical swine fever virus strain 94.4/IL/94/TWN, complete genome	12296	linear	AY646427	56566023	True	AY646427	Eukaryote
Sapovirus NongKhai-50/Thailand, complete genome	7429	linear	AY646853	380877192	True	AY646853	Eukaryote
Sapovirus Chanthaburi-74/Thailand, complete genome	7429	linear	AY646854	380877195	True	AY646854	Eukaryote
Sapovirus SaKaeo-15/Thailand, complete genome	7459	linear	AY646855	84782679	True	AY646855	Eukaryote
Sapovirus NongKhai-24/Thailand, complete genome	7500	linear	AY646856	84994063	True	AY646856	Eukaryote
Hepatitis delta virus isolate TW3038#25, complete genome	1678	linear	AY648955	55793428	True	AY648955	Eukaryote
Papaya leaf curl China virus-Guangzhou isolate, complete genome	2769	circular	AY650283	49616583	True	AY650283	Eukaryote
Hepatitis C virus isolate Khaja1, complete genome	9441	linear	AY651061	50235321	True	AY651061	Eukaryote
Acanthamoeba polyphaga mimivirus, complete genome	1181404	linear	AY653733	55416625	True	AY653733	Eukaryote
Simian immunodeficiency virus strain SIVtal-00CM266, complete genome	9338	linear	AY655744	56681247	True	AY655744	Eukaryote
Grouper iridovirus, complete genome	139793	circular	AY666015	56418213	True	AY666015	Eukaryote
Human coxsackievirus B3 strain GA, complete genome	7400	linear	AY673831	50604532	True	AY673831	Eukaryote
Vaccinia virus strain LC16m8, complete genome	189158	linear	AY678275	56713341	True	AY678275	Eukaryote
Vaccinia virus strain Lister, complete genome	189122	linear	AY678276	56713624	True	AY678276	Eukaryote
HIV-1 isolate 04RU128005 from Russia, complete genome	9089	linear	AY682547	50404184	True	AY682547	Eukaryote
Foot-and-mouth disease virus O/ES/2001 isolate O/ES/2001, complete genome	8163	linear	AY686687	51104937	True	AY686687	Eukaryote
SARS coronavirus A022, complete genome	29499	linear	AY686863	56462868	True	AY686863	Eukaryote
SARS coronavirus B039, complete genome	29525	linear	AY686864	55275786	True	AY686864	Eukaryote
Foot-and-mouth disease virus - type Asia 1 isolate IND 321/01, complete genome	8178	linear	AY687333	51340579	True	AY687333	Eukaryote
Foot-and-mouth disease virus - type Asia 1 strain IND 491/97, complete genome	8178	linear	AY687334	51340581	True	AY687334	Eukaryote
West Nile virus strain Sarafend, complete genome	11057	linear	AY688948	51095221	True	AY688948	Eukaryote
Porcine circovirus 1, complete genome	1759	circular	AY699796	54399524	True	AY699796	Eukaryote
Murine hepatitis virus strain A59, complete genome	31335	linear	AY700211	51557240	True	AY700211	Eukaryote
HIV-1 isolate 03ZASK040B1 from South Africa, complete genome	9020	linear	AY703908	51572093	True	AY703908	Eukaryote
HIV-1 isolate 04ZASK134B1 from South Africa, complete genome	9028	linear	AY703909	51572103	True	AY703909	Eukaryote
HIV-1 isolate 04ZASK143B1 from South Africa, complete genome	9065	linear	AY703910	51572113	True	AY703910	Eukaryote
HIV-1 isolate 04ZASK144B1 from South Africa, complete genome	9049	linear	AY703911	51572122	True	AY703911	Eukaryote
Feline immunodeficiency virus clone pOma3, complete genome	9751	linear	AY713445	51980733	True	AY713445	Eukaryote
Human astrovirus type 4 strain Dresden, complete genome	6723	linear	AY720891	57545930	True	AY720891	Eukaryote
Human astrovirus type 1 strain Dresden, complete genome	6777	linear	AY720892	57545934	True	AY720892	Eukaryote
Hepatitis E virus isolate IND-SW-00-01, complete genome	7262	linear	AY723745	57902414	True	AY723745	Eukaryote
Pneumonia virus of mice strain 15, complete genome	14886	linear	AY729016	58610194	True	AY729016	Eukaryote
Human adenovirus type 34 strain Compton, complete genome	34775	linear	AY737797	57115661	True	AY737797	Eukaryote
Human adenovirus type 50 strain Wan, complete genome	35385	linear	AY737798	57115702	True	AY737798	Eukaryote
Pneumonia virus of mice 15, complete genome	14887	linear	AY743910	56606933	True	AY743910	Eukaryote
HIV-1 isolate 04RU129005 from Russia, complete genome	9160	linear	AY751406	54124748	True	AY751406	Eukaryote
HIV-1 isolate 04RU139089 from Russia, complete genome	8960	linear	AY751407	54124758	True	AY751407	Eukaryote
Human rhinovirus 39, complete genome	7137	linear	AY751783	53987041	True	AY751783	Eukaryote
Simian-Human immunodeficiency virus isolate SHIVku2, complete genome	9997	linear	AY751799	54111969	True	AY751799	Eukaryote
Monkeypox virus strain COP-58, complete genome	199469	linear	AY753185	59858806	True	AY753185	Eukaryote
Tomato leaf curl Karnataka virus, complete genome	2757	circular	AY754812	58803018	True	AY754812	Eukaryote
West Nile virus strain Rabensburg isolate 97-103, complete genome	10972	linear	AY765264	58702120	True	AY765264	Eukaryote
Reston ebolavirus strain Pennsylvania, complete genome	18895	linear	AY769362	55247455	True	AY769362	Eukaryote
HIV-1 isolate BREPM107 from Brazil, complete genome	8798	linear	AY771588	55735949	True	AY771588	Eukaryote
HIV-1 isolate BREPM108 from Brazil, complete genome	9058	linear	AY771589	55735957	True	AY771589	Eukaryote
HIV-1 isolate BREPM119 from Brazil, complete genome	8680	linear	AY771590	55735966	True	AY771590	Eukaryote
HIV-1 isolate BREPM269 from Brazil, complete genome	8908	linear	AY771591	55735975	True	AY771591	Eukaryote
HIV-1 isolate BREPM275 from Brazil, complete genome	8671	linear	AY771592	55735984	True	AY771592	Eukaryote
HIV-1 isolate BREPM278 from Brazil, complete genome	8948	linear	AY771593	55735993	True	AY771593	Eukaryote
SARS coronavirus WH20, complete genome	29461	linear	AY772062	60267744	True	AY772062	Eukaryote
HIV-1 isolate 96CMABB55 from Cameroon, complete genome	9071	linear	AY772535	60218863	True	AY772535	Eukaryote
HIV-1 isolate 03ZASK023B2 from South Africa, complete genome	9039	linear	AY772690	55139251	True	AY772690	Eukaryote
HIV-1 isolate 03ZASK029B2 from South Africa, complete genome	9060	linear	AY772691	55139261	True	AY772691	Eukaryote
HIV-1 isolate 03ZASK033B2 from South Africa, complete genome	9039	linear	AY772692	55139271	True	AY772692	Eukaryote
HIV-1 isolate 03ZASK041B1 from South Africa, complete genome	8966	linear	AY772693	55139280	True	AY772693	Eukaryote
HIV-1 isolate 03ZASK065B1 from South Africa, complete genome	9095	linear	AY772694	55139290	True	AY772694	Eukaryote
HIV-1 isolate 03ZASK112B1 from South Africa, complete genome	9039	linear	AY772695	55139300	True	AY772695	Eukaryote
HIV-1 isolate 03ZASK116B1 from South Africa, complete genome	9061	linear	AY772696	55139308	True	AY772696	Eukaryote
HIV-1 isolate 04ZASK130B1 from South Africa, complete genome	5569	linear	AY772697	55139318	True	AY772697	Eukaryote
HIV-1 isolate 04ZASK133B1 from South Africa, complete genome	8981	linear	AY772698	55139321	True	AY772698	Eukaryote
HIV-1 isolate 04ZASK146B1 from South Africa, complete genome	9011	linear	AY772699	55139330	True	AY772699	Eukaryote
HIV-1 isolate 03ZASK043B1 from South Africa, complete genome	9111	linear	AY772700	55139340	True	AY772700	Eukaryote
HIV-1 isolate 03ZASK091B1 from South Africa, complete genome	6735	linear	AY772701	55139350	True	AY772701	Eukaryote
Norovirus Hu/NLV/GII/Neustrelitz260/2000/DE from Germany, complete genome	7579	linear	AY772730	54694862	True	AY772730	Eukaryote
Human enterovirus 90 isolate F950027, complete genome	7438	linear	AY773285	54873665	True	AY773285	Eukaryote
HIV-1 isolate D.ZA.84.R2 from South Africa, complete genome	8700	linear	AY773338	55740225	True	AY773338	Eukaryote
HIV-1 isolate D.ZA.85.R214 from South Africa, complete genome	8640	linear	AY773339	55740235	True	AY773339	Eukaryote
HIV-1 isolate D.ZA.85.R286 from South Africa, complete genome	8670	linear	AY773340	55740245	True	AY773340	Eukaryote
HIV-1 isolate D.ZA.86.R482 from South Africa, complete genome	8640	linear	AY773341	55740255	True	AY773341	Eukaryote
Peanut stunt virus, complete genome	2170	linear	AY775057	55140577	True	AY775057	Eukaryote
Large yellow croaker iridovirus, complete genome	111760	circular	AY779031	113200500	True	AY779031	Eukaryote
HIV-1 isolate CANA6FULL from Canada, complete genome	8780	linear	AY779552	55275135	True	AY779552	Eukaryote
HIV-1 isolate CANB5FULL from Canada, complete genome	8693	linear	AY779555	55275165	True	AY779555	Eukaryote
HIV-1 isolate CANB6FULL from Canada, complete genome	8678	linear	AY779556	55275175	True	AY779556	Eukaryote
HIV-1 isolate CANC8FULL from Canada, complete genome	8714	linear	AY779563	55275245	True	AY779563	Eukaryote
HIV-1 isolate CANA1FULL from Canada, complete genome	8720	linear	AY779564	55275255	True	AY779564	Eukaryote
HIV-1 isolate 01UYTRA1101 from Uruguay, complete genome	8803	linear	AY781125	62637562	True	AY781125	Eukaryote
HIV-1 isolate 01UYTRA1092 from Uruguay, complete genome	8798	linear	AY781126	62637563	True	AY781126	Eukaryote
HIV-1 isolate 01UYTRA1179 from Uruguay, complete genome	8861	linear	AY781127	62637564	True	AY781127	Eukaryote
HIV-1 isolate 01UYTRA1020 from Uruguay, complete genome	8801	linear	AY781128	62637565	True	AY781128	Eukaryote
Nandina mosaic virus isolate PLH 1, complete genome	6066	linear	AY800279	60419059	True	AY800279	Eukaryote
Human adenovirus type 14 strain de Wit, complete genome	34764	linear	AY803294	57115621	True	AY803294	Eukaryote
HIV-1 isolate HIV1084i from Zambia, complete genome	9646	linear	AY805330	56131599	True	AY805330	Eukaryote
HIV-1 isolate Phcsffull04 from Australia, complete genome	8967	linear	AY818644	55925136	True	AY818644	Eukaryote
Murine leukemia virus serotype HEMV provirus, complete genome	8546	linear	AY818896	55979252	True	AY818896	Eukaryote
HIV-1 isolate 04RU139095 from Russia, complete genome	8960	linear	AY819715	56417604	True	AY819715	Eukaryote
Venezuelan equine encephalitis virus strain MX01-22, complete genome	11464	linear	AY823299	56789993	True	AY823299	Eukaryote
Norovirus swine/GII/OH-QW125/03/US, complete genome	7612	linear	AY823305	392973379	True	AY823305	Eukaryote
Torque teno virus isolate 2h, complete genome	3816	circular	AY823988	58613381	True	AY823988	Eukaryote
Torque teno virus isolate 3h, complete genome	3920	circular	AY823989	58613386	True	AY823989	Eukaryote
Maize chlorotic dwarf virus isolate M1, complete genome	11900	linear	AY829112	56387338	True	AY829112	Eukaryote
HIV-1 isolate 5096-83 clone np1 from USA, complete genome	9628	linear	AY835748	60651827	True	AY835748	Eukaryote
HIV-1 isolate 5096-90 clone np4 from USA, complete genome	9692	linear	AY835751	60652054	True	AY835751	Eukaryote
HIV-1 isolate 5155-96 clone np8 from USA, complete genome	9790	linear	AY835753	60652063	True	AY835753	Eukaryote
HIV-1 isolate 5113-86 clone pbf12 from USA, complete genome	9739	linear	AY835757	60651886	True	AY835757	Eukaryote
HIV-1 isolate 5113-87 clone pbf13 from USA, complete genome	9757	linear	AY835758	60652072	True	AY835758	Eukaryote
HIV-1 isolate 5048-82 clone pbf14 from USA, complete genome	9747	linear	AY835759	60651896	True	AY835759	Eukaryote
HIV-1 isolate 5048-87 clone pbf15 from USA, complete genome	9749	linear	AY835760	60651905	True	AY835760	Eukaryote
HIV-1 isolate 5048-91 clone pbf16 from USA, complete genome	9824	linear	AY835761	60652082	True	AY835761	Eukaryote
HIV-1 isolate 5160-84 clone pbf17 from USA, complete genome	9703	linear	AY835762	60651915	True	AY835762	Eukaryote
HIV-1 isolate 5160-88 clone pbf18 from USA, complete genome	9784	linear	AY835763	60651925	True	AY835763	Eukaryote
HIV-1 isolate 5160-92 clone pbf19 from USA, complete genome	9775	linear	AY835764	60651935	True	AY835764	Eukaryote
HIV-1 isolate 5077-85 clone pbf23 from USA, complete genome	9709	linear	AY835769	60651955	True	AY835769	Eukaryote
HIV-1 isolate 5082-97 clone pbf27 from USA, complete genome	9724	linear	AY835772	60652112	True	AY835772	Eukaryote
HIV-1 isolate 5127-86 clone pbf29 from USA, complete genome	9736	linear	AY835774	60651995	True	AY835774	Eukaryote
HIV-1 isolate 5084-86 clone pbf3 from USA, complete genome	9722	linear	AY835775	60652005	True	AY835775	Eukaryote
HIV-1 isolate 5127-93 clone pbf30 from USA, complete genome	9715	linear	AY835776	60652122	True	AY835776	Eukaryote
HIV-1 isolate 5018-86 clone pbf6 from USA, complete genome	9703	linear	AY835778	60652024	True	AY835778	Eukaryote
HIV-1 isolate 5019-86 clone pbf8 from USA, complete genome	9664	linear	AY835780	60652044	True	AY835780	Eukaryote
HIV-1 isolate 5157-83 clone pbf9 from USA, complete genome	9712	linear	AY835781	60652132	True	AY835781	Eukaryote
HIV-1 isolate 1189MB from South Africa, complete genome	9014	linear	AY838565	57338543	True	AY838565	Eukaryote
HIV-1 isolate 1184MB from South Africa, complete genome	9016	linear	AY838566	57338548	True	AY838566	Eukaryote
HIV-1 isolate 1069MB from South Africa, complete genome	9036	linear	AY838567	57338555	True	AY838567	Eukaryote
HIV-1 isolate J112MA from South Africa, complete genome	9049	linear	AY838568	57338562	True	AY838568	Eukaryote
Human enterovirus 79 strain USA/CA79-10384, complete genome	7430	linear	AY843297	61608274	True	AY843297	Eukaryote
Human enterovirus 80 strain USA/CA67-10387, complete genome	7428	linear	AY843298	61608279	True	AY843298	Eukaryote
Human enterovirus 81 strain USA/CA68-10389, complete genome	7415	linear	AY843299	61608282	True	AY843299	Eukaryote
Human enterovirus 82 strain USA/CA64-10390, complete genome	7427	linear	AY843300	61608286	True	AY843300	Eukaryote
Human enterovirus 83 strain USA/CA76-10392, complete genome	7394	linear	AY843301	61608290	True	AY843301	Eukaryote
Human enterovirus 77 strain USA/TX97-10394, complete genome	7422	linear	AY843302	61608293	True	AY843302	Eukaryote
Human enterovirus 85 strain BAN00-10353, complete genome	7418	linear	AY843303	61608296	True	AY843303	Eukaryote
Human enterovirus 86 strain BAN00-10354, complete genome	7400	linear	AY843304	61608299	True	AY843304	Eukaryote
Human enterovirus 87 strain BAN01-10396, complete genome	7422	linear	AY843305	61608302	True	AY843305	Eukaryote
Human enterovirus 88 strain BAN01-10398, complete genome	7433	linear	AY843306	61608305	True	AY843306	Eukaryote
Human enterovirus 97 strain BAN99-10355, complete genome	7413	linear	AY843307	61608308	True	AY843307	Eukaryote
Human enterovirus 101 strain CIV03-10361, complete genome	7445	linear	AY843308	61608311	True	AY843308	Eukaryote
Barley yellow dwarf virus - PAV strain PAV-CN, complete genome	5652	linear	AY855920	57341360	True	AY855920	Eukaryote
Human adenovirus type 46, complete genome	35178	linear	AY875648	62177315	True	AY875648	Eukaryote
Human coxsackievirus B5 isolate 2000/CSF/KOR, complete genome	7403	linear	AY875692	58372545	True	AY875692	Eukaryote
HIV-1 isolate 04ZASK182B1 from South Africa, complete genome	9084	linear	AY878054	58220859	True	AY878054	Eukaryote
HIV-1 isolate 04ZASK183B1 from South Africa, complete genome	8977	linear	AY878055	58220869	True	AY878055	Eukaryote
HIV-1 isolate 03ZASK006B2 from South Africa, complete genome	9086	linear	AY878056	58220879	True	AY878056	Eukaryote
HIV-1 isolate 03ZASK092B1 from South Africa, complete genome	9047	linear	AY878057	58220889	True	AY878057	Eukaryote
HIV-1 isolate 04ZASK168B1 from South Africa, complete genome	9055	linear	AY878058	58220899	True	AY878058	Eukaryote
HIV-1 isolate 04ZASK180B1 from South Africa, complete genome	9042	linear	AY878059	58220909	True	AY878059	Eukaryote
HIV-1 isolate 03ZASK097B1 from South Africa, complete genome	9045	linear	AY878060	58220919	True	AY878060	Eukaryote
HIV-1 isolate 03ZASK098B1 from South Africa, complete genome	9007	linear	AY878061	58220929	True	AY878061	Eukaryote
HIV-1 isolate 04ZASK181B1 from South Africa, complete genome	9153	linear	AY878062	58220939	True	AY878062	Eukaryote
HIV-1 isolate 03ZASK019B2 from South Africa, complete genome	9105	linear	AY878063	58220949	True	AY878063	Eukaryote
HIV-1 isolate 03ZASK020B2 from South Africa, complete genome	9038	linear	AY878064	58220959	True	AY878064	Eukaryote
HIV-1 isolate 03ZASK034B1 from South Africa, complete genome	9005	linear	AY878065	58220969	True	AY878065	Eukaryote
HIV-1 isolate 03ZASK037B2 from South Africa, complete genome	8407	linear	AY878066	58220979	True	AY878066	Eukaryote
HIV-1 isolate 04ZASK038B1 from South Africa, complete genome	8116	linear	AY878067	58220988	True	AY878067	Eukaryote
HIV-1 isolate 03ZASK039B2 from South Africa, complete genome	9084	linear	AY878068	58220998	True	AY878068	Eukaryote
HIV-1 isolate 03ZASK042B2 from South Africa, complete genome	6898	linear	AY878069	58221008	True	AY878069	Eukaryote
HIV-1 isolate 03ZASK094B1 from South Africa, complete genome	9101	linear	AY878070	58221016	True	AY878070	Eukaryote
HIV-1 isolate 04ZASK154B1 from South Africa, complete genome	9065	linear	AY878071	58221026	True	AY878071	Eukaryote
HIV-1 isolate 04ZASK139B1 from South Africa, complete genome	9047	linear	AY878072	58221036	True	AY878072	Eukaryote
Rupestris stem pitting-associated virus strain BS, complete genome	8743	linear	AY881627	61228607	True	AY881627	Eukaryote
HIV-1 isolate 9196/01 from Germany, complete genome	9062	linear	AY882421	62361768	True	AY882421	Eukaryote
Human coronavirus HKU1 genotype B, complete genome	29815	linear	AY884001	85372431	True	AY884001	Eukaryote
Orange-spotted grouper iridovirus, complete genome	112636	linear	AY894343	62421189	True	AY894343	Eukaryote
Alfuy virus strain MRM3929, complete genome	10960	linear	AY898809	62421411	True	AY898809	Eukaryote
HIV-1 isolate CB347 from Cuba, complete genome	8945	linear	AY900572	164415911	True	AY900572	Eukaryote
HIV-1 isolate CB378 from Cuba, complete genome	9025	linear	AY900574	164415916	True	AY900574	Eukaryote
HIV-1 isolate CB471 from Cuba, complete genome	8987	linear	AY900575	164415921	True	AY900575	Eukaryote
HIV-1 isolate CB619 from Cuba, complete genome	9037	linear	AY900576	164415923	True	AY900576	Eukaryote
Caprine arthritis-encephalitis virus strain gansu, complete genome	9186	linear	AY900630	62363227	True	AY900630	Eukaryote
HIV-1 isolate 03ZASK011B2 from South Africa, complete genome	9138	linear	AY901965	59003507	True	AY901965	Eukaryote
HIV-1 isolate 03ZASK036B1 from South Africa, complete genome	9003	linear	AY901966	59003517	True	AY901966	Eukaryote
HIV-1 isolate 03ZASK058B2 from South Africa, complete genome	9106	linear	AY901967	59003527	True	AY901967	Eukaryote
HIV-1 isolate 03ZASK061B1 from South Africa, complete genome	9045	linear	AY901968	59003537	True	AY901968	Eukaryote
HIV-1 isolate 03ZASK066B1 from South Africa, complete genome	9131	linear	AY901969	59003547	True	AY901969	Eukaryote
HIV-1 isolate 03ZASK073B1 from South Africa, complete genome	9120	linear	AY901970	59003557	True	AY901970	Eukaryote
HIV-1 isolate 03ZASK078B1 from South Africa, complete genome	9121	linear	AY901971	59003567	True	AY901971	Eukaryote
HIV-1 isolate 04ZASK082B1 from South Africa, complete genome	9052	linear	AY901972	59003577	True	AY901972	Eukaryote
HIV-1 isolate 04ZASK140B1 from South Africa, complete genome	9036	linear	AY901973	59003587	True	AY901973	Eukaryote
HIV-1 isolate 04ZASK031B2 from South Africa, complete genome	9079	linear	AY901974	59003597	True	AY901974	Eukaryote
HIV-1 isolate 03ZASK076B1 from South Africa, complete genome	9114	linear	AY901975	59003607	True	AY901975	Eukaryote
HIV-1 isolate 04ZASK145B1 from South Africa, complete genome	9094	linear	AY901976	59003617	True	AY901976	Eukaryote
HIV-1 isolate 04ZASK151B1 from South Africa, complete genome	9036	linear	AY901977	59003626	True	AY901977	Eukaryote
HIV-1 isolate 04ZASK155B1 from South Africa, complete genome	9029	linear	AY901978	59003636	True	AY901978	Eukaryote
HIV-1 isolate 04ZASK163B1 from South Africa, complete genome	9067	linear	AY901979	59003646	True	AY901979	Eukaryote
HIV-1 isolate 04ZASK174B1 from South Africa, complete genome	9112	linear	AY901980	59003656	True	AY901980	Eukaryote
HIV-1 isolate 03ZASK084B1 from South Africa, complete genome	9013	linear	AY901981	59003666	True	AY901981	Eukaryote
Lynx rufus papillomavirus type 1, complete genome	8233	circular	AY904722	62547897	True	AY904722	Eukaryote
Puma concolor papillomavirus type 1, complete genome	8321	circular	AY904723	62547905	True	AY904723	Eukaryote
Panthera leo persica papillomavirus type 1, complete genome	8103	circular	AY904724	62547913	True	AY904724	Eukaryote
Plum pox virus isolate W3174, complete genome	9788	linear	AY912055	62766782	True	AY912055	Eukaryote
Newcastle disease virus isolate I-2, complete genome	15186	linear	AY935499	62901506	True	AY935499	Eukaryote
Blueberry scorch virus isolate BC-1, complete genome	8522	linear	AY941198	62870867	True	AY941198	Eukaryote
Blueberry scorch virus isolate BC-2, complete genome	8525	linear	AY941199	62870874	True	AY941199	Eukaryote
HIV-1 isolate HS123 from Tanzania, complete genome	8809	linear	AY945709	62946400	True	AY945709	Eukaryote
Human herpesvirus 4 strain GD1, complete genome	171657	circular	AY961628	84519641	True	AY961628	Eukaryote
Yellow fever virus strain Angola71, complete genome	10823	linear	AY968064	63147726	True	AY968064	Eukaryote
Yellow fever virus strain Uganda48a, complete genome	10823	linear	AY968065	63147728	True	AY968065	Eukaryote
HIV-1 isolate ARE195FL from Argentina, complete genome	8834	linear	AY968312	63081177	True	AY968312	Eukaryote
HIV-1 strain H434 clone 8-A3 from Netherlands, complete genome	9606	linear	AY970946	62548157	True	AY970946	Eukaryote
HIV-1 strain H434 clone 8-F4 from Netherlands, complete genome	9616	linear	AY970947	62548167	True	AY970947	Eukaryote
HIV-1 strain H434 clone 42-C1 from Netherlands, complete genome	9677	linear	AY970949	62548187	True	AY970949	Eukaryote
HIV-1 strain H434 clone 42-E12 from Netherlands, complete genome	9784	linear	AY970950	62548197	True	AY970950	Eukaryote
TPA_inf: Human herpesvirus 5 strain AD169 substrain varUK, complete genome	230290	linear	BK000394	229269506	True	BK000394	Eukaryote
Hepatitis B virus DNA, complete genome, strain: LSH	3182	circular	D00220	163838595	True	D00220	Eukaryote
Human rhinovirus 1B, complete genome	7133	linear	D00239	221708	True	D00239	Eukaryote
Human coxsackievirus A21 (strain Coe) genomic RNA, complete genome	7401	linear	D00538	221147	True	D00538	Eukaryote
Cucumber mosaic virus satellite RNA, complete genome	338	linear	D00541	222048	True	D00541	Eukaryote
Human coxsackievirus A9 genomic RNA, complete genome, strain: Griggs	7452	linear	D00627	221214	True	D00627	Eukaryote
Cucumber mosaic virus satellite RNA, complete genome	338	linear	D00699	222046	True	D00699	Eukaryote
Human immunodeficiency virus 2 proviral DNA, complete genome	11443	linear	D00835	3153166	True	D00835	Eukaryote
Tobacco necrosis virus D genomic RNA, complete genome	3762	linear	D00942	1638813	True	D00942	Eukaryote
Cucumber mosaic virus satellite RNA genomic RNA, complete genome, clone: pUT119GG-S	369	linear	D10038	222058	True	D10038	Eukaryote
Chicken anemia virus DNA, complete genome	2298	circular	D10068	221116	True	D10068	Eukaryote
Human immunodeficiency virus 1 proviral DNA, complete genome	9591	linear	D10112	221474	True	D10112	Eukaryote
Rous sarcoma virus - Schmidt-Ruppin D genomic RNA, complete genome	9317	linear	D10652	221012	True	D10652	Eukaryote
Rice tungro bacilliform virus DNA, complete genome	8002	circular	D10774	222571	True	D10774	Eukaryote
Hepatitis C virus genomic RNA, complete genome, strain: JT'	9434	linear	D11355	221614	True	D11355	Eukaryote
Hepatitis C virus strain J33 genomic RNA, complete genome	9427	linear	D14484	1160327	True	D14484	Eukaryote
Hepatitis C virus (isolate HC-G9) genomic RNA, complete genome	9487	linear	D14853	464177	True	D14853	Eukaryote
Apple chlorotic leaf spot virus genomic RNA, complete genome	7552	linear	D14996	434059	True	D14996	Eukaryote
Hepatitis C virus (isolate NZL1) genomic RNA, complete genome	9456	linear	D17763	514395	True	D17763	Eukaryote
Cucumber mosaic virus satellite RNA, complete genome, clone: pKN-sat	405	linear	D28559	487913	True	D28559	Eukaryote
Hepatitis C virus (isolate HCV-K3a/650) genomic RNA, complete genome	9454	linear	D28917	558520	True	D28917	Eukaryote
Feline calicivirus genomic RNA, complete genome	7681	linear	D31836	98986307	True	D31836	Eukaryote
Hepatitis C virus (isolate Tr Kj) genomic RNA, complete genome	9444	linear	D49374	676877	True	D49374	Eukaryote
Hepatitis C virus (isolate BEBE1) genomic RNA, complete genome	9513	linear	D50409	1483141	True	D50409	Eukaryote
Hepatitis C virus (isolate JK049) genomic RNA, complete genome	9450	linear	D63821	1183032	True	D63821	Eukaryote
Hepatitis C virus (isolate JK046) genomic RNA, complete genome	9461	linear	D63822	1183030	True	D63822	Eukaryote
Hepatitis C virus (isolate VN235) genomic RNA, complete genome	9615	linear	D84263	60115455	True	D84263	Eukaryote
Hepatitis C virus (isolate VN405) genomic RNA, complete genome	9601	linear	D84264	60115456	True	D84264	Eukaryote
Hepatitis C virus (isolate VN004) genomic RNA, complete genome	9621	linear	D84265	60115457	True	D84265	Eukaryote
Barley yellow dwarf virus-PAV genomic RNA, complete genome	5667	linear	D85783	1395150	True	D85783	Eukaryote
[truncated: 42,116 more rows]

## Sheet: Table S2
Table S2. Largest ViPhOGs. List of ViPhOGs that are built from more than 100 regions.
Num Regions = Number of regions that are included in the ViPhOG.
Num Genomes = Number of genomes that possess the regions included in the ViPhOG.
Functional annotation = Include which words and how many times (in parenthesis) that word appeared in the annotation of the regions included in the ViPhOG.
Family Assignation = A sorted list of the family assignation of the genomes that possess the regions included in the ViPhOGs.
ViPhOG ID	Num Regions	Num Genomes	Functional Annotation	Family Assignment
ViPhOG00937	3440	1180	subunit(1088) DEAD(1472) like(1811) helicases(1472) superfamily(2351) Superfamilies(2588) 1(2588) and(2588) 2(2588) helicase(2609) Q(1) motif(42) profile(2688) Homing(29) endonuclease(93) Intein(106) C(1343) terminal(1775) splicing(57) region(62) Hint(61) AP2(1) domain(2805) Uncharacterised(6) protein(306)	[('Myoviridae', 1156), ('Poxviridae', 862), ('Siphoviridae', 695), ('Mimiviridae', 196), ('Iridoviridae', 130), ('Phycodnaviridae', 92), ('Podoviridae', 71), ('Asfarviridae', 49), ('Marseilleviridae', 35), ('Baculoviridae', 29), ('Lipothrixviridae', 13), ('Ascoviridae', 7), ('Nimaviridae', 4)]
ViPhOG01191	3095	1392	intron(1) endonuclease(2161) NUMOD3(2) motif(295) NUMOD1(26) domain(137) profile(6) HNH(1903) nucleases(910) (URI(1)	[('Siphoviridae', 1804), ('Myoviridae', 682), ('Podoviridae', 325), ('Mimiviridae', 80), ('Phycodnaviridae', 57), ('Marseilleviridae', 21), ('Iridoviridae', 15), ('Spiraviridae', 1)]
ViPhOG00105	2419	2139	intein(11) C(445) terminus(323) Probable(323) DNA(323) packing(323) protein,(441) N(229) terminal(123) region(11) Intein(10) signature(2) Terminase(1096) like(806) family(944) Phage(472) terminase(181)	[('Siphoviridae', 1015), ('Myoviridae', 478), ('Podoviridae', 342), ('Herpesviridae', 312), ('Alloherpesviridae', 10), ('Malacoherpesviridae', 2)]
ViPhOG00655	2151	1056	set(3) domain(679) profile(664) Thioredoxin(203) family(65) active(241) site(242) Glutaredoxin(631) GlrX_YruB:(5) glutaredoxin(112) like(13) protein(406) CR1(402) RL11(120)	[('Herpesviridae', 690), ('Myoviridae', 514), ('Adenoviridae', 458), ('Siphoviridae', 210), ('Poxviridae', 102), ('Mimiviridae', 51), ('Iridoviridae', 36), ('Phycodnaviridae', 24), ('Podoviridae', 22), ('Marseilleviridae', 15), ('Ascoviridae', 4), ('Spiraviridae', 1)]
ViPhOG00332	1934	835	P1A(765) P1B(1284) VP2(1284) P1C(1284) Picornavirus(735) core(488) protein(1158) Protein(16) of(851) cellular(279) activities(279) POLYPROTEIN(1284) COAT(1284) CORE(1284) 2A(1174) P1D(713) VP4(1284) GENOME(765)	[('Picornaviridae', 1929)]
ViPhOG01992	1915	685	vFam_4485_59_112(1) vFam_179_208_286(20) vFam_2806_42_89(12) vFam_4515_50_186(12)	[('Siphoviridae', 1841), ('Podoviridae', 24), ('Myoviridae', 18), ('Lipothrixviridae', 2), ('Phycodnaviridae', 1), ('Rudiviridae', 1)]
ViPhOG00581	1894	1246	(DUF739)(35) Helix(1178) turn(1200) helix(1200) XRE(1055) family(1056) like(1080) proteins(1055) Cro/C1(1117) type(1117) HTH(1117) DNA(107) binding(98) domain(1447) profile(1101) Bacterial(1)	[('Siphoviridae', 923), ('Myoviridae', 551), ('Podoviridae', 164), ('Mimiviridae', 12), ('Phycodnaviridae', 10), ('Inoviridae', 7), ('Spiraviridae', 1)]
ViPhOG01184	1685	940	Transposase(5) zinc(295) finger(290) dnaG:(6) DNA(76) primase(180) helicase(104) Zinc(104) binding(104) domain(385) profile(173) Toprim(437) like(352)	[('Myoviridae', 847), ('Siphoviridae', 535), ('Podoviridae', 244)]
ViPhOG00588	1654	1273	helicase,(22) DnaB(661) like(661) Superfamily(694) 4(694) helicase(756) domain(1250) intein_Cterm:(1) intein(1) C(661) terminal(663) region(5) Intein(2) splicing(2) motif(2) profile(1014) 1(180) ATPases(237)	[('Myoviridae', 766), ('Siphoviridae', 591), ('Podoviridae', 211)]
ViPhOG00020	1585	173	vFam_53_3_179(7) vFam_779_100_241(6) vFam_1835_21_125(6) vFam_2688_77_170(6) vFam_3285_23_156(6) vFam_1156_15_130(6) vFam_1001_77_135(5) vFam_3272_138_194(6) vFam_3537_98_147(6) vFam_784_87_141(6)	[('Herpesviridae', 1585)]
ViPhOG00231	1494	1112	virus,(32) VP4(217) subunit(185) picornavirus(1180) capsid(1197) protein(1384) signature(143) Foot(143)	[('Picornaviridae', 1134), ('Caliciviridae', 179), ('Iflaviridae', 77), ('Dicistroviridae', 65), ('Secoviridae', 8), ('Marnaviridae', 1)]
ViPhOG01206	1346	592	Phage(148) T7(148) tail(148) fibre(148) protein(384) Coiled(9)	[('Myoviridae', 902), ('Podoviridae', 181), ('Phycodnaviridae', 14), ('Siphoviridae', 8), ('Marseilleviridae', 1)]
ViPhOG00239	1314	1101	site(1) profile(885) (+)RNA(884) virus(884) 1a(2) protein(7) C(73) terminal(73) domain(1101) Viral(1013) (Superfamily(1013) 1)(1013) RNA(1013) helicase(1170) ATP(2)	[('Betaflexiviridae', 292), ('Alphaflexiviridae', 187), ('Arteriviridae', 157), ('Myoviridae', 135), ('Hepeviridae', 133), ('Closteroviridae', 85), ('Virgaviridae', 53), ('Tymoviridae', 44), ('Podoviridae', 42), ('Baculoviridae', 38), ('Siphoviridae', 20), ('Endornaviridae', 16), ('Coronaviridae', 16), ('Mimiviridae', 14), ('Bromoviridae', 12), ('Mesoniviridae', 12), ('Iridoviridae', 8), ('Togavi…
ViPhOG00272	1231	636		[('Geminiviridae', 1152), ('Circoviridae', 5), ('Caulimoviridae', 2)]
ViPhOG00167	1198	1198		[('Retroviridae', 1198)]
ViPhOG00169	1163	1163	Transactivating(1163) regulatory(1163) protein(1163) (anti(1) repression(1) trans(1)	[('Retroviridae', 1163)]
ViPhOG00170	1163	1163	REV(1163) protein(1163) (anti(1163) repression(1163) trans(1163) activator(1163) protein)(1163)	[('Retroviridae', 1163)]
ViPhOG00175	1160	1160	Negative(1160) factor,(1160) (F(1160) Protein)(1160) or(1160) Nef(1160)	[('Retroviridae', 1160)]
ViPhOG00168	1159	1159		[('Retroviridae', 1159)]
ViPhOG00171	1158	1158	Vpu(1158) protein(1158)	[('Retroviridae', 1158)]
ViPhOG00163	1138	1138	NA	[('Retroviridae', 1138)]
ViPhOG00161	1135	1133		[('Retroviridae', 1135)]
ViPhOG00053	1124	1101	endonuclease(1) domain(1109) profile(468) Ribonucleotide(1108) reductase(987) large(986) subunit(850) signature(986) Intein(7) C(5) terminal(43) RNR_1b_NrdE:(34) ribonucleoside(812) diphosphate(706) reductase,(1118) class(34)	[('Myoviridae', 386), ('Herpesviridae', 315), ('Siphoviridae', 139), ('Poxviridae', 104), ('Baculoviridae', 47), ('Iridoviridae', 23), ('Podoviridae', 20), ('Phycodnaviridae', 17), ('Mimiviridae', 12), ('Asfarviridae', 8), ('Alloherpesviridae', 7), ('Nimaviridae', 4), ('Nudiviridae', 4), ('Malacoherpesviridae', 2), ('Hytrosaviridae', 1), ('Marseilleviridae', 1)]
ViPhOG00162	1122	1122		[('Retroviridae', 1122)]
ViPhOG00174	1111	1111	NA	[('Retroviridae', 1111)]
ViPhOG00172	1108	1108		[('Retroviridae', 1108)]
ViPhOG00166	1103	1103		[('Retroviridae', 1103)]
ViPhOG00164	1076	1076	Retroviral(1076) aspartyl(1076) protease(1076) Aspartyl(1076) protease,(1076) retroviral(1076) type(1076) family(1076) profile(1076) Reverse(1076) transcriptase(1076) (RT)(1076) catalytic(1076) domain(1076) RNase(1076)	[('Retroviridae', 1076)]
ViPhOG00165	1061	1061		[('Retroviridae', 1061)]
ViPhOG00731	1057	1045	Deoxycytidine(18) triphosphate(42) nucleotidohydrolase(10) [dut](10) dut:(336) dUTP(336) diphosphatase(336) Zinc(39) binding(39) domain(40) profile(41) RNase(6) H(6) dUTPase(1024) protein(133)	[('Herpesviridae', 299), ('Adenoviridae', 190), ('Poxviridae', 137), ('Siphoviridae', 101), ('Myoviridae', 90), ('Baculoviridae', 43), ('Retroviridae', 42), ('Podoviridae', 39), ('Iridoviridae', 28), ('Phycodnaviridae', 16), ('Alloherpesviridae', 9), ('Asfarviridae', 9), ('Caulimoviridae', 5), ('Nimaviridae', 4), ('Malacoherpesviridae', 4), ('Rudiviridae', 4), ('Bicaudaviridae', 2), ('Nudiviridae…
ViPhOG00980	1013	767	A)(1) signature(432) DNA(771) polymerase(771) family(771) A(771) domain(734) Intein(1) N(2)	[('Siphoviridae', 391), ('Podoviridae', 328), ('Myoviridae', 253)]
ViPhOG00072	981	918	binding(3) domain(917) EF(3)	[('Herpesviridae', 314), ('Myoviridae', 303), ('Poxviridae', 143), ('Baculoviridae', 117), ('Iridoviridae', 35), ('Phycodnaviridae', 18), ('Mimiviridae', 14), ('Asfarviridae', 8), ('Marseilleviridae', 4), ('Ascoviridae', 4), ('Hytrosaviridae', 2), ('Nudiviridae', 1)]
ViPhOG01506	968	164	family(5) profile(961) ankyrin(960) repeats(961) (many(220) copies)(703) Ankyrin(961) repeat(961) signature(86) Aspartyl(5)	[('Poxviridae', 786), ('Mimiviridae', 144), ('Phycodnaviridae', 25), ('Iridoviridae', 5), ('Polydnaviridae', 1)]
ViPhOG00215	912	906		[('Betaflexiviridae', 178), ('Hepeviridae', 133), ('Tombusviridae', 96), ('Alphaflexiviridae', 95), ('Togaviridae', 85), ('Closteroviridae', 83), ('Flaviviridae', 73), ('Virgaviridae', 52), ('Tymoviridae', 44), ('Luteoviridae', 23), ('Endornaviridae', 18), ('Bromoviridae', 12), ('Alphatetraviridae', 2), ('Nodaviridae', 1), ('Mesoniviridae', 1), ('Carmotetraviridae', 1), ('Gammaflexiviridae', 1)]
ViPhOG00229	911	823	Viral(19) RNA(831) polymerase(815) RdRp(794) of(810) positive(810) ssRNA(810) viruses(810) catalytic(794) domain(880) profile(880) Small(102)	[('Potyviridae', 394), ('Caliciviridae', 266), ('Astroviridae', 89), ('Iflaviridae', 42), ('Dicistroviridae', 33), ('Partitiviridae', 25), ('Secoviridae', 21), ('Hypoviridae', 5), ('Fusarividae', 2), ('Totiviridae', 2), ('Picornaviridae', 1), ('Marnaviridae', 1)]
ViPhOG00602	906	572	copies)(68) Gp5(224) C(68) terminal(224) repeat(68)	[('Myoviridae', 607), ('Podoviridae', 131), ('Siphoviridae', 94)]
ViPhOG00821	870	865	motif(1) profile(19) ATP(2) cone(2) domain(18) Ribonucleotide(870) reductase,(870) class(16)	[('Myoviridae', 383), ('Herpesviridae', 150), ('Poxviridae', 121), ('Baculoviridae', 49), ('Siphoviridae', 37), ('Iridoviridae', 35), ('Phycodnaviridae', 18), ('Mimiviridae', 13), ('Podoviridae', 12), ('Asfarviridae', 8), ('Alloherpesviridae', 7), ('Marseilleviridae', 5), ('Nimaviridae', 4), ('Nudiviridae', 4), ('Malacoherpesviridae', 2), ('Hytrosaviridae', 1), ('Ascoviridae', 1)]
ViPhOG00865	811	463	(SH3)(5) domain(806) profile(806) Protein(806) tyrosine(101) kinase(806) Serine/Threonine(637) protein(696) kinases(672) specific(71) active(638) site(638) signature(673) Adenylate(28)	[('Poxviridae', 242), ('Mimiviridae', 150), ('Baculoviridae', 129), ('Herpesviridae', 107), ('Iridoviridae', 46), ('Marseilleviridae', 40), ('Phycodnaviridae', 29), ('Retroviridae', 10), ('Alloherpesviridae', 9), ('Asfarviridae', 8), ('Podoviridae', 6), ('Ascoviridae', 3), ('Nudiviridae', 2), ('Myoviridae', 1), ('Siphoviridae', 1)]
ViPhOG00553	806	776		[('Siphoviridae', 414), ('Baculoviridae', 116), ('Podoviridae', 84), ('Myoviridae', 73), ('Plasmaviridae', 1), ('Poxviridae', 1), ('Nudiviridae', 1)]
ViPhOG04463	720	432	P(6) loop(6) containing(6) region(6) of(7) AAA(280) domain(361) ATPases(1)	[('Myoviridae', 565), ('Siphoviridae', 65), ('Mimiviridae', 24), ('Marseilleviridae', 13), ('Iridoviridae', 13), ('Podoviridae', 11), ('Ascoviridae', 7), ('Phycodnaviridae', 2)]
ViPhOG04984	719	163	Prolyl(574) 4(574) hydroxylase(574) alpha(574) subunit(574) homologues(574) 2OG(572) Fe(II)(572) oxygenase(572) superfamily(572)	[('Myoviridae', 637), ('Mimiviridae', 28), ('Phycodnaviridae', 26), ('Podoviridae', 7)]
ViPhOG00205	713	339		[('Hepadnaviridae', 713)]
ViPhOG00146	699	695	NS1(188) Superfamily(667) 3(667) helicase(667) of(667) DNA(667) viruses(667) domain(667) IQ(1) motif(1) profile(667) Polyomavirus(150)	[('Papillomaviridae', 357), ('Parvoviridae', 168), ('Polyomaviridae', 149), ('Adenoviridae', 14), ('Herpesviridae', 9), ('Bidnaviridae', 1)]
ViPhOG00269	689	688	virus(9) coat(681) protein/nuclear(677) export(677) factor(677) BR1(677) family(677) Satellite(9)	[('Geminiviridae', 650), ('Circoviridae', 8), ('Myoviridae', 1), ('Caulimoviridae', 1)]
ViPhOG00857	654	333	site(1) profile(596) Ring(404) finger(619) domain(141) Zinc(604) finger,(364) C3HC4(369) type,(5) RING(606) type(604) in(1)	[('Baculoviridae', 268), ('Herpesviridae', 72), ('Poxviridae', 62), ('Iridoviridae', 52), ('Phycodnaviridae', 33), ('Mimiviridae', 32), ('Alloherpesviridae', 28), ('Ascoviridae', 27), ('Iflaviridae', 13), ('Nimaviridae', 12), ('Arenaviridae', 11), ('Marseilleviridae', 9), ('Malacoherpesviridae', 9), ('Nudiviridae', 5), ('Hytrosaviridae', 4), ('Adenoviridae', 1), ('Arteriviridae', 1)]
ViPhOG00313	654	640	activities(9) Helicase(505) associated(19) domain(650) Superfamilies(650) 1(650) and(650) 2(650) helicase(650) Q(1) motif(1) profile(650) Flavivirus(214) DEAD(648) box(387) subfamily(131) ATP(650) dependent(131)	[('Potyviridae', 394), ('Poxviridae', 143), ('Flaviviridae', 78), ('Mimiviridae', 26), ('Asfarviridae', 10), ('Lipothrixviridae', 1)]
ViPhOG00273	646	646		[('Geminiviridae', 581), ('Circoviridae', 6), ('Caulimoviridae', 1)]
ViPhOG03132	632	285	NA	[('Baculoviridae', 347), ('Siphoviridae', 122), ('Myoviridae', 34), ('Poxviridae', 29), ('Mimiviridae', 28), ('Ascoviridae', 26), ('Iridoviridae', 20), ('Podoviridae', 14), ('Phycodnaviridae', 1)]
ViPhOG00822	629	561	G(55) I(143) region(144) XPG(144) protein(3) signature(61) 5prima(237) 3prima(237) exonuclease,(226) C(123) terminal(251) resolvase(225) like(225) domain(250) Helix(120)	[('Podoviridae', 172), ('Herpesviridae', 171), ('Myoviridae', 170), ('Iridoviridae', 35), ('Siphoviridae', 26), ('Mimiviridae', 15), ('Marseilleviridae', 5), ('Ascoviridae', 4), ('Phycodnaviridae', 3)]
ViPhOG00210	614	614	(A3)(12) signature(37) Reverse(614) transcriptase(614) (RNA(611) dependent(611) DNA(613) polymerase)(611) RNase(43) H(43) domain(613) profile(613) Retroviral(10)	[('Hepadnaviridae', 342), ('Retroviridae', 151), ('Caulimoviridae', 121)]
ViPhOG00457	608	373	enzyme(373) Papain(399) like(399) viral(399) protease(399) Peptidase(459) C16(459) family(459) Macro(373) domain(594) profile(594) Appr(373) 1(373) p(373)	[('Coronaviridae', 569), ('Hepeviridae', 25), ('Togaviridae', 9), ('Iridoviridae', 5)]
ViPhOG00197	606	606	Hepatitis(606) C(606) virus(606) non(606) structural(606) 5a(606) zinc(606) finger(606) domain(606)	[('Flaviviridae', 606)]
ViPhOG00204	605	605	Hepatitis(605) C(605) virus(605) non(605) structural(605) protein(605) 2(605) (NS2)(605) protease(605) domain(605) profile(605)	[('Flaviviridae', 605)]
ViPhOG00196	605	605	Hepatitis(605) C(605) virus(605) non(605) structural(605) 5a(605) protein(605) membrane(605) anchor(605)	[('Flaviviridae', 605)]
ViPhOG00194	605	605	NA	[('Flaviviridae', 605)]
ViPhOG00193	605	605	Hepatitis(605) C(605) virus(605) non(605) structural(605) protein(605) NS4b(605)	[('Flaviviridae', 605)]
ViPhOG00202	604	604	Hepatitis(604) C(604) virus(604) non(604) structural(604) protein(604) E2/NS1(604) Sushi/CCP/SCR(1) domain(1) profile(1)	[('Flaviviridae', 604)]
ViPhOG00201	604	604	Viral(604) RNA(604) polymerase(604) RdRp(603) of(603) positive(603) ssRNA(603) viruses(603) catalytic(603) domain(603) profile(603)	[('Flaviviridae', 604)]
ViPhOG00482	604	402	NA	[('Circoviridae', 435), ('Parvoviridae', 3), ('Poxviridae', 2), ('Dicistroviridae', 1), ('Iflaviridae', 1), ('Phycodnaviridae', 1)]
ViPhOG04458	603	401	subunit(43) signature(38) ATPase(325) family(323) associated(385) with(385) a(363) variety(363) of(363) cellular(385) activities(385) (AAA)(323) Endopeptidase(24)	[('Myoviridae', 428), ('Mimiviridae', 69), ('Podoviridae', 40), ('Siphoviridae', 28), ('Phycodnaviridae', 14), ('Hytrosaviridae', 1)]
ViPhOG00203	603	603	vFam_1699_47_103(4) vFam_4736_9_76(1) vFam_1699_55_66(1)	[('Flaviviridae', 603)]
ViPhOG00191	602	602	Hepatitis(602) C(602) virus(602) core(602) protein(602)	[('Flaviviridae', 602)]
ViPhOG00199	602	602	Hepatitis(602) C(602) virus(602) capsid(602) protein(602)	[('Flaviviridae', 602)]
ViPhOG00190	586	586	Hepatitis(586) C(586) virus(586) NS3(586) protease(586) DEAD(586) domain(586) profile(586) Superfamilies(586) 1(586) and(586) 2(586) helicase(586) ATP(585)	[('Flaviviridae', 586)]
ViPhOG00320	566	557	A(389) cysteine(459) protease(465) (NIa(394) pro)(394) domain(481) profile(394) Peptidase(395) family(465) signature(460) Potyvirus(394) nuclear(389)	[('Potyviridae', 394), ('Astroviridae', 97), ('Caliciviridae', 70), ('Myoviridae', 1), ('Coronaviridae', 1), ('Siphoviridae', 1)]
ViPhOG00984	564	564	NHEJ_ligase_lig:(2) DNA(551) ligase(551) C(136)	[('Myoviridae', 208), ('Podoviridae', 132), ('Poxviridae', 121), ('Baculoviridae', 33), ('Siphoviridae', 27), ('Phycodnaviridae', 13), ('Asfarviridae', 9), ('Marseilleviridae', 5), ('Nudiviridae', 3)]
ViPhOG01884	563	563		[('Siphoviridae', 504), ('Myoviridae', 14), ('Podoviridae', 10)]
ViPhOG00264	559	559	HCV(559) NS5a(559) protein(559) C(559) terminal(559) region(559)	[('Flaviviridae', 559)]
ViPhOG00262	559	559		[('Flaviviridae', 559)]
ViPhOG00263	558	558	Hepatitis(558) C(558) virus(558) non(558) structural(558) 5a(558) domain(558) 1b(558)	[('Flaviviridae', 558)]
ViPhOG00261	558	558	Hepatitis(558) C(558) virus(558) non(558) structural(558) protein(558) NS4a(558)	[('Flaviviridae', 558)]
ViPhOG00413	554	554	NA	[('Picornaviridae', 553)]
ViPhOG01205	512	492	Transglycosylase(326) SLT(282) domain(326) Prokaryotic(60) transglycosylases(60) signature(60)	[('Myoviridae', 220), ('Siphoviridae', 190), ('Podoviridae', 85), ('Tectiviridae', 6)]
ViPhOG00445	511	508		[('Coronaviridae', 335), ('Arteriviridae', 157), ('Mesoniviridae', 11), ('Roniviridae', 4)]
ViPhOG00330	509	509	methyltransferase(322) domain(509) profile(509) Mononegavirales(509) mRNA(322)	[('Paramyxoviridae', 273), ('Rhabdoviridae', 192), ('Filoviridae', 21), ('Bornaviridae', 10), ('Nyamiviridae', 3)]
ViPhOG00416	505	505	3C(503) cysteine(503) protease(503) (picornain(503) 3C)(503)	[('Picornaviridae', 504)]
ViPhOG00417	502	502		[('Picornaviridae', 501)]
ViPhOG00016	499	204	peptide(1) receptor(494) type(5) 1(497) signature(490) G(497) protein(497) coupled(497) receptors(497) family(497) 2(1) profile(497) Rhodopsin(490)	[('Herpesviridae', 469), ('Poxviridae', 28), ('Iridoviridae', 2)]
ViPhOG00133	499	498	uracil(333) DNA(488) glycosylase(488) signature(465)	[('Herpesviridae', 325), ('Poxviridae', 143), ('Mimiviridae', 13), ('Alloherpesviridae', 7), ('Marseilleviridae', 5), ('Podoviridae', 1)]
ViPhOG10032	499	423	Carbohydrate(2) binding(2) domain(2)	[('Siphoviridae', 473), ('Myoviridae', 24)]
ViPhOG00525	496	480	LIN2390(27) DIRECT(55) CAPSID(55) COAT(28) APSE(10) P22(83) coat(83) protein(83) 5(83) MAJOR(37) LJ928(27) STRUCTURAL(55) PROPHAGE(27) GP34(27)	[('Podoviridae', 209), ('Siphoviridae', 153), ('Myoviridae', 12)]
ViPhOG00414	495	495	Poliovirus(493) 3A(493) protein(493) like(493)	[('Picornaviridae', 494)]
ViPhOG00415	487	487	vFam_326_63_89(19) vFam_2838_8_25(12) vFam_326_65_89(1) vFam_2493_8_43(1) vFam_537_0_15(19) vFam_2838_58_66(1)	[('Picornaviridae', 486)]
ViPhOG04118	486	164	US22(484) like(484)	[('Herpesviridae', 486)]
ViPhOG04577	484	244	profile(1) TAIL(399) TUBE(399) GP19(399) LIKE(399) GP19V(399) GP54(399) SEQUENCING(399) DIRECT(399) T4(308)	[('Myoviridae', 478)]
ViPhOG00660	483	224	helix(6) repeats(6) Adenoviral(441) fibre(466) protein(466) (repeat/shaft(287) region)(287) Parallel(6)	[('Adenoviridae', 483)]
ViPhOG02960	483	151	type(193) profile(408) Baculoviral(368) inhibition(368) of(368) Apoptosis(367) domain(367) IAP(8) like(10) protein(368) repeat(406) C3HC(2)	[('Baculoviridae', 425), ('Poxviridae', 14), ('Nudiviridae', 11), ('Malacoherpesviridae', 10), ('Asfarviridae', 8), ('Dicistroviridae', 7), ('Iridoviridae', 2), ('Hytrosaviridae', 1)]
ViPhOG01981	480	448		[('Siphoviridae', 449), ('Myoviridae', 13), ('Podoviridae', 9)]
ViPhOG01880	476	476		[('Siphoviridae', 301), ('Myoviridae', 124), ('Podoviridae', 5)]
ViPhOG02065	475	474	Protein(458) of(458) unknwon(458) function(458) (DUF3310)(458)	[('Myoviridae', 170), ('Siphoviridae', 167), ('Podoviridae', 84)]
ViPhOG06257	463	463	N(388) acetylmuramoyl(388) L(388) alanine(388) amidase(388) EF(1)	[('Siphoviridae', 364), ('Myoviridae', 83), ('Podoviridae', 7)]
ViPhOG00270	457	457		[('Geminiviridae', 455), ('Mimiviridae', 1), ('Caulimoviridae', 1)]
ViPhOG00271	451	451		[('Geminiviridae', 450), ('Caulimoviridae', 1)]
ViPhOG01207	447	265	terminal(1) Phage(240) Tail(232) Collar(232) Domain(232) Short(41) tail(48) fibre(48) protein(42) gp37(1)	[('Myoviridae', 347), ('Podoviridae', 49), ('Siphoviridae', 32), ('Phycodnaviridae', 2), ('Mimiviridae', 1)]
ViPhOG00481	447	445	Putative(409) viral(409) replication(409) protein(410) signature(1) Geminivirus(2) CLV(1)	[('Circoviridae', 265), ('Poxviridae', 6), ('Nanoviridae', 3), ('Phycodnaviridae', 1)]
ViPhOG03222	447	438	Baculovirus(116) major(116) capsid(116) protein(116) VP39(116)	[('Myoviridae', 161), ('Baculoviridae', 117), ('Siphoviridae', 79), ('Podoviridae', 51), ('Mimiviridae', 13), ('Iridoviridae', 6), ('Marseilleviridae', 5), ('Poxviridae', 1), ('Alloherpesviridae', 1), ('Phycodnaviridae', 1)]
ViPhOG05950	444	359	NA	[('Siphoviridae', 362), ('Myoviridae', 74), ('Podoviridae', 6)]
ViPhOG04808	438	419	tape_meas_nterm:(408) tape(408) measure(408) domain(408)	[('Siphoviridae', 349), ('Myoviridae', 62), ('Podoviridae', 6)]
ViPhOG00274	431	431		[('Geminiviridae', 430), ('Caulimoviridae', 1)]
ViPhOG02059	420	420		[('Myoviridae', 206), ('Siphoviridae', 134), ('Podoviridae', 40), ('Phycodnaviridae', 13), ('Rudiviridae', 2), ('Bicaudaviridae', 2)]
ViPhOG01488	417	126	NA	[('Poxviridae', 417)]
ViPhOG04552	416	257	I(80) intron(80) endonuclease(80) GIY(209) YIG(209) type(201) nucleases(201) (URI(201) domain)(201) NUMOD3(66)	[('Myoviridae', 318), ('Phycodnaviridae', 41), ('Siphoviridae', 16), ('Mimiviridae', 13), ('Iridoviridae', 12), ('Podoviridae', 9)]
ViPhOG04583	414	245	NA	[('Myoviridae', 409)]
ViPhOG00450	413	413	NA	[('Coronaviridae', 253), ('Arteriviridae', 157), ('Podoviridae', 1)]
ViPhOG00300	413	413	A(1) cysteine(338) protease(338) (picornain(337) 3C)(337) Calicivirus(174) non(174) structural(174) polyprotein(174) family(175) signature(175)	[('Picornaviridae', 328), ('Iflaviridae', 36), ('Dicistroviridae', 33), ('Secoviridae', 8), ('Potyviridae', 1)]
ViPhOG01268	410	326		[('Myoviridae', 199), ('Siphoviridae', 93), ('Podoviridae', 40), ('Marseilleviridae', 20), ('Phycodnaviridae', 11)]
ViPhOG01480	406	104	NA	[('Poxviridae', 404), ('Mimiviridae', 1), ('Phycodnaviridae', 1)]
ViPhOG04594	401	401	Gene(276) 25(276) like(276) lysozyme(276)	[('Myoviridae', 385), ('Siphoviridae', 2)]
ViPhOG00981	400	337		[('Myoviridae', 249), ('Siphoviridae', 42), ('Herpesviridae', 32), ('Iridoviridae', 20), ('Mimiviridae', 14), ('Podoviridae', 12), ('Marseilleviridae', 5), ('Nimaviridae', 4), ('Nudiviridae', 3), ('Phycodnaviridae', 3), ('Hytrosaviridae', 2), ('Poxviridae', 1), ('Alloherpesviridae', 1)]
ViPhOG00322	393	393	Potyvirus(393) coat(393) protein(393)	[('Potyviridae', 393)]
ViPhOG01264	393	323	resistance(2) MerR(2) type(208) recombinase(208) catalytic(208) domain(239) Site(70) specific(70)	[('Siphoviridae', 304), ('Myoviridae', 27), ('Mimiviridae', 19), ('Podoviridae', 4), ('Inoviridae', 3), ('Phycodnaviridae', 3)]
ViPhOG00173	392	392	Envelope(392) glycoprotein(392) GP120(392)	[('Retroviridae', 392)]
ViPhOG03083	387	271	HAD(43) superfamily,(43) subfamily(43) IIIB(43) (Acid(43) phosphatase)(43)	[('Myoviridae', 295), ('Siphoviridae', 52), ('Phycodnaviridae', 16), ('Podoviridae', 9), ('Baculoviridae', 8), ('Mimiviridae', 1), ('Ascoviridae', 1), ('Iridoviridae', 1)]
ViPhOG00324	386	386	Serine(22) peptidase(22) of(22) plant(22) viral(22) polyprotein,(22) P1(386) protease(364)	[('Potyviridae', 386)]
ViPhOG04466	384	383	Calcineurin(349) like(349) phosphoesterase(349) superfamily(197) domain(197)	[('Myoviridae', 320), ('Siphoviridae', 20), ('Mimiviridae', 12), ('Iridoviridae', 9), ('Marseilleviridae', 5), ('Ascoviridae', 4), ('Podoviridae', 1), ('Nudiviridae', 1), ('Phycodnaviridae', 1)]
ViPhOG00798	374	363	Deoxynucleoside(77) kinase(373) from(149) Herpesvirus(38) C(38)	[('Herpesviridae', 149), ('Poxviridae', 108), ('Iridoviridae', 37), ('Myoviridae', 18), ('Alloherpesviridae', 15), ('Podoviridae', 9), ('Asfarviridae', 9), ('Siphoviridae', 5), ('Phycodnaviridae', 5), ('Ascoviridae', 4), ('Nimaviridae', 4), ('Nudiviridae', 2), ('Hytrosaviridae', 1), ('Baculoviridae', 1)]
ViPhOG00267	371	371	AV2(371) CAPSID(371) PRE(371) COAT(371) ORF(371) Geminivirus(371) V1(371) protein(371) EF(1)	[('Geminiviridae', 369), ('Caulimoviridae', 1)]
ViPhOG10836	369	369	NA	[('Siphoviridae', 345), ('Myoviridae', 23)]
ViPhOG00226	368	235		[('Polyomaviridae', 267), ('Myoviridae', 36), ('Mimiviridae', 27), ('Baculoviridae', 19), ('Phycodnaviridae', 6), ('Marseilleviridae', 4), ('Poxviridae', 2), ('Podoviridae', 2), ('Papillomaviridae', 2), ('Siphoviridae', 2)]
ViPhOG00323	366	366	P1(1) protease(365) (CPD)(365) domain(365) profile(365)	[('Potyviridae', 366)]
ViPhOG00189	364	364		[('Papillomaviridae', 364)]
ViPhOG03004	364	302	domain(32) profile(8) S21(295) class(313) N4(296) adenine(313) specific(322) DNA(336) methyltransferase(313) signature(322) Intein(4) N(192)	[('Siphoviridae', 194), ('Myoviridae', 105), ('Podoviridae', 17), ('Phycodnaviridae', 6), ('Bicaudaviridae', 2)]
ViPhOG04447	362	259	NA	[('Myoviridae', 339), ('Siphoviridae', 14)]
ViPhOG00317	362	362	NA	[('Potyviridae', 361), ('Siphoviridae', 1)]
ViPhOG00314	360	360	NA	[('Potyviridae', 360)]
ViPhOG00316	359	359	Potyvirus(359) nuclear(359) inclusion(359) A(359) cysteine(359) protease(359) (C4)(359) signature(359)	[('Potyviridae', 359)]
ViPhOG00315	358	358	Potyvirus(358) nuclear(358) inclusion(358) A(358) cysteine(358) protease(358) (C4)(358) signature(358)	[('Potyviridae', 358)]
ViPhOG02507	358	159	Protein(15) of(15) unknown(15) function(15) (DUF2726)(1)	[('Myoviridae', 182), ('Siphoviridae', 52), ('Marseilleviridae', 43), ('Mimiviridae', 40), ('Iridoviridae', 31), ('Ascoviridae', 3), ('Phycodnaviridae', 1)]
ViPhOG00318	358	358	Potyvirus(358) nuclear(358) inclusion(358) A(358) cysteine(358) protease(358) (C4)(358) signature(358)	[('Potyviridae', 358)]
ViPhOG00188	358	358		[('Papillomaviridae', 358)]
ViPhOG00182	357	357		[('Papillomaviridae', 357)]
ViPhOG00184	357	357	terminal(350) E2(357) (early)(350)	[('Papillomaviridae', 357)]
ViPhOG04939	356	356		[('Siphoviridae', 252), ('Myoviridae', 66), ('Podoviridae', 6)]
ViPhOG00098	351	172	Betaherpesvirus(350) UL82/83(350) protein(350) N(350) terminus(350)	[('Herpesviridae', 351)]
ViPhOG00478	349	330		[('Coronaviridae', 349)]
ViPhOG06081	348	326	Baseplate(283) J(283) like(283) protein(283)	[('Myoviridae', 317), ('Siphoviridae', 3)]
ViPhOG01474	348	139	site(4) profile(4) SERine(346) Proteinase(346) INhibitors(346) Serpin(346) (serine(346) protease(346) inhibitor)(346) Serpins(227) signature(227)	[('Poxviridae', 334), ('Mimiviridae', 13), ('Baculoviridae', 1)]
ViPhOG01696	347	206	glucose(2) 4,6(113) dehydratase(113) [gmd](47) gmd:(48) GDP(158) L(45)	[('Myoviridae', 176), ('Poxviridae', 109), ('Phycodnaviridae', 24), ('Iridoviridae', 19), ('Mimiviridae', 15), ('Bicaudaviridae', 2), ('Spiraviridae', 1)]
ViPhOG00209	347	347	antigen(2) DNA(347) polymerase(347) (viral)(347) C(2) terminal(347) domain(347) Major(1)	[('Hepadnaviridae', 347)]
ViPhOG00325	345	345	Protein(343) P3(343) of(343) Potyviral(343) polyprotein(343) EF(5) hand(5) calcium(5) binding(5) domain(5) profile(5)	[('Potyviridae', 345)]
ViPhOG00650	345	210	Protein(325) of(325) unknown(325) function(325) (DUF2890)(325)	[('Adenoviridae', 345)]
ViPhOG01598	344	335	C(130) terminal(162) like(136) Superfamily(337) 3(337) helicase(337) of(337) DNA(337) viruses(337) domain(337) profile(337) primase_Cterm:(130)	[('Poxviridae', 146), ('Siphoviridae', 78), ('Iridoviridae', 37), ('Phycodnaviridae', 19), ('Mimiviridae', 14), ('Podoviridae', 10), ('Asfarviridae', 8), ('Marseilleviridae', 5), ('Ascoviridae', 5), ('Myoviridae', 4), ('Nudiviridae', 1)]
ViPhOG00206	343	343		[('Hepadnaviridae', 343)]
ViPhOG00446	343	343	Coronaviridae(343) metal(343) binding(343) (CV(343) MBD)(343) domain(343) profile(343)	[('Coronaviridae', 332), ('Mesoniviridae', 8)]
ViPhOG00208	341	332		[('Hepadnaviridae', 341)]
ViPhOG00459	336	329	NA	[('Coronaviridae', 336)]
ViPhOG00032	334	173	Herpesvirus(333) phosphoprotein(333) 85(333) (HHV6(333) 7(333) U14/HCMV(333) UL25)(333)	[('Herpesviridae', 334)]
ViPhOG00451	333	332	Coronavirus(332) NSP13(332)	[('Coronaviridae', 332)]
ViPhOG00180	332	332	Prokaryotic(2) membrane(2) lipoprotein(2) lipid(2) attachment(2) site(2) profile(2) Early(332) Protein(332) (E6)(332)	[('Papillomaviridae', 332)]
ViPhOG10837	332	332	NA	[('Siphoviridae', 308), ('Myoviridae', 23)]
ViPhOG00443	331	328	Coronavirus(330) RPol(330) N(330) terminus(330)	[('Coronaviridae', 331)]
ViPhOG00319	331	331	Potyvirus(331) nuclear(331) inclusion(331) A(331) cysteine(331) protease(331) (C4)(331) signature(331)	[('Potyviridae', 331)]
ViPhOG00464	329	329	nsp8(329) replicase(329)	[('Coronaviridae', 329)]
ViPhOG00462	329	329	NA	[('Coronaviridae', 329)]
ViPhOG00465	329	329	nsp9(329) replicase(329)	[('Coronaviridae', 329)]
ViPhOG00461	329	329		[('Coronaviridae', 329)]
ViPhOG00460	329	329	Coronavirus(329) nonstructural(329) protein(329) 4(329) C(329) terminus(329)	[('Coronaviridae', 329)]
ViPhOG00466	329	329	RNA(329) synthesis(329) protein(329) NSP10(329)	[('Coronaviridae', 329)]
ViPhOG00181	328	328	E7(323) protein,(323) Early(323) protein(323)	[('Papillomaviridae', 328)]
ViPhOG00447	327	327	NA	[('Coronaviridae', 327)]
ViPhOG00463	327	327	NA	[('Coronaviridae', 327)]
ViPhOG00449	327	327	activities(38) Viral(178) (Superfamily(178) 1)(178) RNA(178) helicase(316) core(316) domain(320) NSP11(327) 4Fe(7)	[('Coronaviridae', 327)]
ViPhOG00472	327	327	Coronavirus(327) S2(327) glycoprotein(327)	[('Coronaviridae', 327)]
ViPhOG00117	326	320	dehydrogenase(1) active(311) site(311) signature(311) Tyrosine(205) protein(311) kinases,(84) catalytic(84) domain(152) profile(152) Protein(161) kinases(311) ATP(10)	[('Herpesviridae', 326)]
ViPhOG00476	326	326	Coronavirus(325) M(325) matrix/glycoprotein(325)	[('Coronaviridae', 326)]
ViPhOG04587	325	178	and(42) other(42) proteins(42) Immunoglobulin(108) I(20) set(20) domain(177) Repeats(42) in(42) polycystic(42) kidney(42) disease(42) 1(42)	[('Myoviridae', 228), ('Siphoviridae', 69), ('Podoviridae', 26)]
ViPhOG00100	323	323	Herpesvirus(323) VP23(323) like(323) capsid(323) protein(323)	[('Herpesviridae', 323)]
ViPhOG00278	322	322	Viral(322) methyltransferase(322) (MT)(322) domain(322) profile(322)	[('Betaflexiviridae', 178), ('Alphaflexiviridae', 96), ('Tymoviridae', 44), ('Gammaflexiviridae', 1)]
ViPhOG00982	322	309		[('Myoviridae', 184), ('Siphoviridae', 92), ('Phycodnaviridae', 20), ('Podoviridae', 16), ('Mimiviridae', 1)]
ViPhOG00121	322	322		[('Herpesviridae', 322)]
ViPhOG00068	320	320	Herpesvirus(319) putative(319) major(319) envelope(319) glycoprotein(319)	[('Herpesviridae', 320)]
ViPhOG00070	320	320	Herpesvirus(320) UL31(320) like(320) protein(320)	[('Herpesviridae', 320)]
ViPhOG04421	320	311	subunit(10) family(11) Exonuclease(145) dnaq:(10) exonuclease,(10) DNA(11) polymerase(11) III,(10)	[('Myoviridae', 159), ('Siphoviridae', 108), ('Mimiviridae', 12), ('Phycodnaviridae', 10), ('Podoviridae', 9), ('Baculoviridae', 9), ('Nudiviridae', 1)]
ViPhOG00065	318	318	Herpesvirus(318) UL33(318) like(318) protein(318)	[('Herpesviridae', 318)]
ViPhOG00129	318	318	Helicase(318) ATPases(26) associated(26) with(26) a(26) variety(26) of(26) cellular(26) activities(26)	[('Herpesviridae', 318)]
ViPhOG00089	318	317	NA	[('Herpesviridae', 318)]
ViPhOG00079	316	315	Herpesvirus(316) transcriptional(316) regulator(316) family(316)	[('Herpesviridae', 316)]
ViPhOG00095	316	316		[('Herpesviridae', 316)]
ViPhOG00091	316	316	Herpes(313) virus(313) proteins(313) UL24(313) and(313) UL76(313)	[('Herpesviridae', 316)]
ViPhOG04595	315	235	STRUCTURAL(85) T4(312) bacteriophage(312) base(312) plate(312) protein(312) HUB(85) GP51(85) ASSEMBLY(85) BASEPLATE(85)	[('Myoviridae', 312)]
ViPhOG00092	315	315	Herpesvirus(311) UL25(311) family(311)	[('Herpesviridae', 315)]
ViPhOG00128	315	315	Herpesvirus(310) UL6(310) like(310)	[('Herpesviridae', 315)]
ViPhOG00081	314	314	vFam_147_2_757(1) vFam_255_82_154(48) vFam_255_194_465(5) vFam_1263_378_429(131) vFam_255_524_989(125) vFam_1263_488_525(130) vFam_1263_590_613(14)	[('Herpesviridae', 314)]
ViPhOG04582	314	225	NA	[('Myoviridae', 310)]
ViPhOG00119	314	314		[('Herpesviridae', 314)]
ViPhOG00784	314	314	Herpesvirus(309) UL7(309) like(309)	[('Herpesviridae', 314)]
ViPhOG00073	313	313	Herpesvirus(310) Glycoprotein(310) B(310)	[('Herpesviridae', 313)]
ViPhOG03017	312	312		[('Siphoviridae', 205), ('Myoviridae', 32), ('Podoviridae', 27)]
ViPhOG01513	312	120	dsDNA(299) Poxvirus(299)	[('Poxviridae', 312)]
ViPhOG00071	311	311	NA	[('Herpesviridae', 311)]
ViPhOG00077	310	310		[('Herpesviridae', 310)]
ViPhOG00058	309	309		[('Herpesviridae', 309)]
ViPhOG11105	308	308	Siphovirus(1) ReqiPepy6(1) Gp37(1) like(1) protein(1)	[('Siphoviridae', 304)]
ViPhOG00075	308	308	Herpesvirus(308) processing(308) and(308) transport(308) protein(308)	[('Herpesviridae', 308)]
ViPhOG00076	308	308	NA	[('Herpesviridae', 308)]
ViPhOG00082	306	306	Herpesviridae(306) UL52/UL70(306) DNA(306) primase(306)	[('Herpesviridae', 306)]
ViPhOG05938	305	183	NA	[('Siphoviridae', 173), ('Myoviridae', 80), ('Podoviridae', 35), ('Marseilleviridae', 5)]
ViPhOG02007	304	201	NA	[('Myoviridae', 188), ('Siphoviridae', 96), ('Podoviridae', 10)]
ViPhOG00111	303	303	vFam_325_13_355(6) vFam_637_26_331(6) vFam_421_158_337(6)	[('Herpesviridae', 303)]
ViPhOG01849	300	175		[('Poxviridae', 189), ('Mimiviridae', 66), ('Siphoviridae', 20), ('Podoviridae', 11), ('Myoviridae', 7), ('Iridoviridae', 5)]
ViPhOG00101	298	298		[('Herpesviridae', 298)]
ViPhOG04576	298	292		[('Myoviridae', 293), ('Siphoviridae', 1)]
ViPhOG00124	297	297	Herpesvirus(297) DNA(297) helicase/primase(297) complex(297) associated(297) protein(297)	[('Herpesviridae', 297)]
ViPhOG00234	297	297		[('Hepeviridae', 133), ('Closteroviridae', 82), ('Virgaviridae', 53), ('Bromoviridae', 12), ('Endornaviridae', 10), ('Alphatetraviridae', 2), ('Mesoniviridae', 1)]
ViPhOG01577	289	287		[('Poxviridae', 131), ('Myoviridae', 100), ('Mimiviridae', 13), ('Asfarviridae', 10), ('Phycodnaviridae', 9), ('Siphoviridae', 7), ('Podoviridae', 6), ('Alloherpesviridae', 6), ('Marseilleviridae', 5)]
ViPhOG04936	285	285		[('Siphoviridae', 179), ('Myoviridae', 85), ('Podoviridae', 2)]
ViPhOG03061	280	225		[('Myoviridae', 211), ('Siphoviridae', 42), ('Podoviridae', 6), ('Phycodnaviridae', 5), ('Marseilleviridae', 3), ('Mimiviridae', 1)]
ViPhOG01923	280	279	endonuclease(65) YqaJ(144) like(144) viral(144) recombinase(144) domain(159) phage_rel_nuc:(65) putative(65) phage(65)	[('Baculoviridae', 117), ('Siphoviridae', 35), ('Podoviridae', 25), ('Phycodnaviridae', 17), ('Mimiviridae', 14), ('Myoviridae', 10), ('Asfarviridae', 8), ('Herpesviridae', 1)]
ViPhOG01608	278	152		[('Poxviridae', 271), ('Iridoviridae', 7)]
ViPhOG00283	276	273		[('Betaflexiviridae', 179), ('Alphaflexiviridae', 96)]
ViPhOG00287	275	275	viroplasmin(1) RNase(273) H(273) Zinc(2) finger(2) integrase(2) type(2) profile(273) Reverse(1)	[('Retroviridae', 148), ('Myoviridae', 69), ('Siphoviridae', 23), ('Mimiviridae', 13), ('Phycodnaviridae', 13), ('Marseilleviridae', 5), ('Podoviridae', 2)]
ViPhOG00230	275	275	terminal(85) Superfamily(274) 3(274) helicase(275) of(274) positive(274) ssRNA(274) viruses(274) domain(274) profile(274) Calicivirus(106)	[('Caliciviridae', 163), ('Iflaviridae', 42), ('Dicistroviridae', 33), ('Secoviridae', 21), ('Circoviridae', 1), ('Marnaviridae', 1)]
ViPhOG06316	274	192		[('Myoviridae', 109), ('Siphoviridae', 99), ('Podoviridae', 45), ('Mimiviridae', 11)]
ViPhOG04562	274	243	TnsA(138) endonuclease(138) N(138) terminal(138)	[('Myoviridae', 270)]
ViPhOG06394	274	141	vFam_771_35_165(12) vFam_1887_84_122(2)	[('Herpesviridae', 274)]
ViPhOG05140	272	86	TIGR02466:(48) conserved(48) hypothetical(48) protein(48) Putative(235) 2OG(235) Fe(II)(235) oxygenase(235)	[('Myoviridae', 256), ('Phycodnaviridae', 1)]
ViPhOG06380	272	141	Inhibitor(8) of(8) apoptosis(8) promoting(8) Bax1(8)	[('Herpesviridae', 272)]
ViPhOG00384	271	271	Fusion(271) glycoprotein(271) F0(271)	[('Paramyxoviridae', 271)]
ViPhOG01583	270	245		[('Poxviridae', 146), ('Baculoviridae', 71), ('Mimiviridae', 18), ('Iridoviridae', 8), ('Lipothrixviridae', 5), ('Siphoviridae', 5), ('Phycodnaviridae', 5), ('Marseilleviridae', 4), ('Myoviridae', 2)]
ViPhOG06396	270	143	NA	[('Herpesviridae', 270)]
ViPhOG03060	267	239		[('Siphoviridae', 156), ('Myoviridae', 47), ('Phycodnaviridae', 24), ('Podoviridae', 8)]
ViPhOG05538	264	264	Peptidase(2) M15(2)	[('Siphoviridae', 171), ('Myoviridae', 68), ('Podoviridae', 14), ('Tectiviridae', 1)]
ViPhOG04184	262	219		[('Herpesviridae', 136), ('Poxviridae', 115), ('Alloherpesviridae', 8), ('Iridoviridae', 3)]
ViPhOG00934	262	262	NA	[('Siphoviridae', 216), ('Podoviridae', 14), ('Myoviridae', 4)]
ViPhOG12456	260	259	NA	[('Siphoviridae', 259)]
ViPhOG12470	259	259	Phage(60) tail(60) protein(60)	[('Siphoviridae', 255)]
ViPhOG00334	258	258		[('Picornaviridae', 258)]
ViPhOG04560	257	236		[('Myoviridae', 254)]
ViPhOG00418	257	257	picornavirus(257) capsid(257) protein(257)	[('Picornaviridae', 256)]
ViPhOG01970	253	253	Endodeoxyribonuclease(208) RusA(208)	[('Siphoviridae', 140), ('Myoviridae', 47), ('Podoviridae', 40)]
ViPhOG01652	252	217	dependent(133) RNA(250) polymerase(250) beta(241) chain(192) signature(192) Intein(4)	[('Poxviridae', 143), ('Iridoviridae', 54), ('Mimiviridae', 19), ('Marseilleviridae', 10), ('Asfarviridae', 9), ('Phycodnaviridae', 5), ('Ascoviridae', 4)]
ViPhOG12466	252	141	GP24(252) GENE(252) GP21(252) GP20(252)	[('Siphoviridae', 250)]
ViPhOG03041	252	231	Phage(250) antirepressor(250) protein(250) KilAC(250) domain(250)	[('Siphoviridae', 181), ('Myoviridae', 36), ('Podoviridae', 18)]
ViPhOG10170	251	128	NA	[('Herpesviridae', 251)]
ViPhOG00530	251	129	NA	[('Myoviridae', 191), ('Podoviridae', 32), ('Marseilleviridae', 11), ('Siphoviridae', 5), ('Iridoviridae', 2), ('Baculoviridae', 1), ('Phycodnaviridae', 1)]
ViPhOG12891	250	130	Chlorophyll(122) A(122) B(122) binding(122) protein(122)	[('Myoviridae', 236), ('Podoviridae', 6), ('Siphoviridae', 1), ('Phycodnaviridae', 1)]
ViPhOG03145	250	249		[('Myoviridae', 152), ('Siphoviridae', 59), ('Baculoviridae', 24), ('Mimiviridae', 6), ('Podoviridae', 3), ('Poxviridae', 2)]
ViPhOG04711	249	246	LIKE(1) Phage(238) related(238) minor(238) tail(247) tape(218) measure(218) protein,(218) TP901(218) family,(218) core(218) region(218) APOLIPOPHORIN(1)	[('Siphoviridae', 165), ('Myoviridae', 50), ('Podoviridae', 5)]
ViPhOG12389	247	247	GP2(142) GENE(142) GP5(142)	[('Siphoviridae', 246)]
ViPhOG01482	247	103		[('Poxviridae', 246), ('Mimiviridae', 1)]
ViPhOG04581	246	244		[('Myoviridae', 243)]
ViPhOG04578	245	245	Bacteriophage(245) T4(245) like(245) capsid(245) assembly(245) protein(245) (Gp20)(245)	[('Myoviridae', 242)]
ViPhOG04832	245	180	NA	[('Myoviridae', 182), ('Podoviridae', 1)]
ViPhOG01546	244	228	ERV/ALR(238) sulfhydryl(238) oxidase(238) domain(238) profile(238) E10(142) like(142) protein(142) conserved(142) region(142)	[('Poxviridae', 143), ('Iridoviridae', 34), ('Mimiviridae', 27), ('Phycodnaviridae', 12), ('Asfarviridae', 9), ('Nudiviridae', 6), ('Marseilleviridae', 5), ('Ascoviridae', 4)]
ViPhOG03031	244	244	NA	[('Myoviridae', 241)]
ViPhOG04903	243	188		[('Myoviridae', 152), ('Siphoviridae', 14), ('Phycodnaviridae', 5), ('Lipothrixviridae', 3), ('Podoviridae', 1)]
ViPhOG04573	242	242	T4(242) like(242) virus(242) Myoviridae(242) tail(242) sheath(242) stabiliser(242)	[('Myoviridae', 239)]
ViPhOG04645	242	242	gp32(232) DNA(232) binding(232) protein(232) like(232)	[('Myoviridae', 238)]
ViPhOG04835	241	240	Calcineurin(171) like(171) phosphoesterase(171) superfamily(60) domain(60)	[('Siphoviridae', 140), ('Podoviridae', 47), ('Myoviridae', 9)]
ViPhOG01883	240	238		[('Siphoviridae', 154), ('Myoviridae', 53), ('Podoviridae', 8), ('Phycodnaviridae', 8)]
ViPhOG04473	240	240	Sigma(44) 70(44) region(44) 2(44)	[('Myoviridae', 237)]
ViPhOG04460	239	239	DNA(63) polymerase(63) processivity(63) factor(63) gp45(207) sliding(207) clamp,(207) C(207) terminal(207)	[('Myoviridae', 235)]
ViPhOG04510	238	145	Predicted(143) nucleotidyltransferase(143)	[('Myoviridae', 222), ('Siphoviridae', 13)]
ViPhOG01698	238	238	Copper/zinc(137) superoxide(137) dismutase(137) family(133) signature(135) 2(119)	[('Poxviridae', 119), ('Baculoviridae', 107), ('Mimiviridae', 6), ('Phycodnaviridae', 4)]
ViPhOG01681	238	151		[('Poxviridae', 221), ('Asfarviridae', 8), ('Herpesviridae', 7), ('Alloherpesviridae', 1), ('Adenoviridae', 1)]
ViPhOG01988	237	237	NA	[('Siphoviridae', 229), ('Podoviridae', 5)]
ViPhOG01198	237	237	Bacteriophage(237) head(237) to(237) tail(237) connecting(237) protein(237)	[('Podoviridae', 167)]
ViPhOG11056	235	235	NA	[('Siphoviridae', 212), ('Myoviridae', 23)]
ViPhOG09757	235	161	Hepatitis(161) C(161) virus(161) capsid(161) protein(161)	[('Flaviviridae', 235)]
ViPhOG00644	235	235		[('Adenoviridae', 235)]
ViPhOG04600	235	232		[('Myoviridae', 232)]
ViPhOG00635	235	235	Adenoviral(235) protein(235) L1(235) 52/55(235) kDa(235)	[('Adenoviridae', 235)]
ViPhOG04457	235	234	Bacteriophage(231) clamp(231) loader(231) A(231) subunit(231)	[('Myoviridae', 231)]
ViPhOG00637	234	234	Hexon(234) associated(234) protein(234) (IIIa)(234)	[('Adenoviridae', 234)]
ViPhOG00638	234	234	Adenovirus(234) penton(234) base(234) protein(234)	[('Adenoviridae', 234)]
ViPhOG04563	234	232		[('Myoviridae', 231)]
ViPhOG04572	234	234	Virus(232) neck(232) protein(232)	[('Myoviridae', 231)]
ViPhOG04571	234	234	NA	[('Myoviridae', 231)]
ViPhOG00649	234	234	Late(233) 100kD(233) protein(233)	[('Adenoviridae', 234)]
ViPhOG00630	234	232		[('Adenoviridae', 234)]
ViPhOG01200	233	233	NA	[('Podoviridae', 166)]
ViPhOG05449	233	166	PD(147) (D/E)XK(147) nuclease(147) superfamily(147)	[('Myoviridae', 205), ('Phycodnaviridae', 2), ('Siphoviridae', 1)]
ViPhOG00632	233	232	Adenoviral(233) DNA(233) terminal(233) protein(233)	[('Adenoviridae', 233)]
ViPhOG00634	232	232	vFam_204_244_353(1) vFam_932_298_371(26) vFam_6009_84_122(17)	[('Adenoviridae', 232)]
ViPhOG00647	232	232		[('Adenoviridae', 232)]
ViPhOG04456	231	231	Bacteriophage(230) translational(230) regulator(230) REPRESSOR(230) REGA(230) LIKE(230) 3D(230) STRUCTURE(230)	[('Myoviridae', 227), ('Mimiviridae', 1)]
ViPhOG04574	231	231		[('Myoviridae', 228)]
ViPhOG01892	231	231	profile(1) phge_HK97_gp10:(163) phage(163) protein,(163) HK97(197) gp10,(160) putative(160) tail(160) component(160) XKDI(1)	[('Siphoviridae', 186), ('Myoviridae', 12), ('Podoviridae', 7)]
ViPhOG03282	230	215		[('Baculoviridae', 113), ('Myoviridae', 79), ('Mimiviridae', 12), ('Iridoviridae', 11), ('Asfarviridae', 9), ('Phycodnaviridae', 3), ('Hytrosaviridae', 1), ('Marseilleviridae', 1)]
ViPhOG00636	230	230	NA	[('Adenoviridae', 230)]
ViPhOG00645	230	230		[('Adenoviridae', 230)]
ViPhOG06252	229	189		[('Siphoviridae', 111), ('Myoviridae', 79), ('Podoviridae', 30)]
ViPhOG02078	229	176	vFam_5616_62_132(1) vFam_5616_95_132(16) vFam_5458_81_130(1) vFam_5458_82_126(4) vFam_5616_95_133(10) vFam_5458_71_128(6) vFam_5458_83_126(10) vFam_5616_90_136(1) vFam_5458_72_126(15) vFam_1137_101_153(8) vFam_5458_71_129(1) vFam_5616_94_132(10) vFam_5616_90_132(1) vFam_5458_83_130(3)	[('Siphoviridae', 129), ('Podoviridae', 33), ('Myoviridae', 20), ('Nimaviridae', 18), ('Mimiviridae', 14), ('Iridoviridae', 3)]
ViPhOG06178	229	229	NA	[('Myoviridae', 224)]
ViPhOG00628	229	229	Adenovirus(228) IVa2(228) protein(228) ATPases(142) associated(142) with(142) a(142) variety(142) of(142) cellular(142) activities(142)	[('Adenoviridae', 229)]
ViPhOG01393	228	133	profile(225) Domain(225) abundant(225) in(225) complement(225) like(225) repeat(225) (SCR(225) repeat)(225) Sushi/CCP/SCR(225)	[('Poxviridae', 214), ('Herpesviridae', 14)]
ViPhOG10439	228	228	Prokaryotic(7) membrane(7) lipoprotein(7) lipid(7) attachment(7) site(7) profile(7) PD(228) (D/E)XK(228) nuclease(228) superfamily(228)	[('Siphoviridae', 214), ('Myoviridae', 8), ('Podoviridae', 1)]
ViPhOG00651	228	228	Adenovirus(228) hexon(228) associated(228) protein,(228) protein(228) VIII(228)	[('Adenoviridae', 228)]
ViPhOG00643	228	228	Minor(228) capsid(228) protein(228) VI(228)	[('Adenoviridae', 228)]
ViPhOG06179	227	227	Domain(227) of(227) unknown(227) function(227) (DUF4815)(227)	[('Myoviridae', 222)]
ViPhOG04459	226	225	NA	[('Myoviridae', 222)]
ViPhOG01663	226	117	NA	[('Poxviridae', 226)]
ViPhOG04575	225	221	NA	[('Myoviridae', 224)]
ViPhOG00086	225	225	Herpesvirus(1) UL49(1) 5(1) envelope/tegument(1) protein(1)	[('Herpesviridae', 225)]
ViPhOG00376	224	224		[('Caulimoviridae', 109), ('Betaflexiviridae', 59), ('Virgaviridae', 50), ('Retroviridae', 3), ('Rhabdoviridae', 2), ('Secoviridae', 1)]
ViPhOG01581	224	216	binding(1) domain(221) 7(22)	[('Poxviridae', 143), ('Iridoviridae', 33), ('Mimiviridae', 16), ('Asfarviridae', 10), ('Marseilleviridae', 10), ('Ascoviridae', 4), ('Phycodnaviridae', 3)]
ViPhOG04648	223	223	Phage(223) late(223) transcription(223) coactivator(223)	[('Myoviridae', 220)]
ViPhOG04593	223	223	Recombination,(223) repair(223) and(223) ssDNA(223) binding(223) protein(223) UvsY(223)	[('Myoviridae', 219)]
ViPhOG00582	223	217		[('Siphoviridae', 133), ('Podoviridae', 49), ('Myoviridae', 23)]
ViPhOG01496	222	116	Poxvirus(208) C4/C10(208) protein(208) PRANC(2) domain(2)	[('Poxviridae', 222)]
ViPhOG00307	220	220	Structural(132) protein(220) 2(132)	[('Hepeviridae', 132), ('Astroviridae', 88)]
ViPhOG00114	217	217	UL95(217) family(217)	[('Herpesviridae', 217)]
ViPhOG01677	217	215	Poxvirus(167) A32(167) protein(167)	[('Poxviridae', 133), ('Iridoviridae', 36), ('Phycodnaviridae', 18), ('Mimiviridae', 14), ('Marseilleviridae', 5), ('Ascoviridae', 4), ('Turriviridae', 2), ('Polydnaviridae', 1)]
ViPhOG00572	216	216	ERF(214) superfamily(214)	[('Siphoviridae', 136), ('Myoviridae', 19), ('Podoviridae', 16)]
ViPhOG02073	216	212	Chitinase(68) class(68) I(68)	[('Siphoviridae', 149), ('Myoviridae', 44), ('Podoviridae', 14)]
ViPhOG04647	216	216		[('Myoviridae', 213)]
ViPhOG01751	215	209	Protein(1) of(1) unknown(1) function(1) (DUF1314)(1)	[('Herpesviridae', 184), ('Iridoviridae', 21), ('Poxviridae', 4), ('Adenoviridae', 4), ('Alloherpesviridae', 2)]
ViPhOG00064	214	214	Herpesvirus(214) virion(214) protein(214) U34(214)	[('Herpesviridae', 214)]
ViPhOG11109	214	154	NA	[('Siphoviridae', 214)]
ViPhOG01733	213	112		[('Poxviridae', 213)]
ViPhOG00639	212	211	Adenoviral(211) core(211) protein(211) VII(211)	[('Adenoviridae', 212)]
ViPhOG01670	212	135		[('Poxviridae', 212)]
ViPhOG00436	211	207		[('Betaflexiviridae', 132), ('Closteroviridae', 26), ('Alphaflexiviridae', 22), ('Mimiviridae', 17), ('Marseilleviridae', 5), ('Potyviridae', 1), ('Myoviridae', 1), ('Siphoviridae', 1), ('Phycodnaviridae', 1), ('Secoviridae', 1)]
ViPhOG01392	210	207		[('Myoviridae', 150), ('Siphoviridae', 20), ('Mimiviridae', 13), ('Herpesviridae', 7), ('Iridoviridae', 6), ('Nudiviridae', 2), ('Hytrosaviridae', 1), ('Phycodnaviridae', 1)]
ViPhOG04715	210	210		[('Siphoviridae', 187), ('Podoviridae', 12)]
ViPhOG00094	210	210	UL79(210) family(210)	[('Herpesviridae', 210)]
ViPhOG00102	210	210	Herpesvirus(209) UL87(209) family(209)	[('Herpesviridae', 210)]
ViPhOG00062	210	210	UL49(209) family(209)	[('Herpesviridae', 210)]
ViPhOG04567	209	209	Bacteriophage(187) T4,(187) Gp8(187)	[('Myoviridae', 206)]
ViPhOG00280	209	209		[('Betaflexiviridae', 115), ('Alphaflexiviridae', 94)]
ViPhOG00108	209	209		[('Herpesviridae', 209)]
ViPhOG00055	209	209	Herpesvirus(209) capsid(209) shell(209) protein(209) VP19C(209)	[('Herpesviridae', 209)]
ViPhOG01499	209	116		[('Poxviridae', 205), ('Myoviridae', 4)]
ViPhOG01693	208	108	Prokaryotic(63) membrane(63) lipoprotein(63) lipid(63) attachment(63) site(63) profile(63) 35kD(206) major(206) secreted(206) virus(206) protein(206)	[('Poxviridae', 208)]
ViPhOG00623	207	204	Adenovirus(207) EB1(207) 55K(207) protein(207) /(207) large(207) t(207) antigen(207)	[('Adenoviridae', 207)]
ViPhOG00662	207	203	Adenovirus(204) early(204) E4(204) 34(204) kDa(204) protein(204) conserved(204) region(204)	[('Adenoviridae', 207)]
ViPhOG00621	206	204	Adenovirus(206) E1B(206) 19K(206) protein(206) /(206) small(206) t(206) antigen(206) BCL2(194) like(194) apoptosis(194)	[('Adenoviridae', 206)]
ViPhOG00641	205	204		[('Adenoviridae', 205)]
ViPhOG01999	205	151	Domain(196) of(196) unknown(196) function(196) (DUF2479)(196)	[('Siphoviridae', 198), ('Podoviridae', 3), ('Papillomaviridae', 1), ('Myoviridae', 1)]
ViPhOG01650	204	202	Mitochondrial(3) resolvase(3) Ydc2(3) /(3) RNA(3) splicing(3) MRS1(3)	[('Poxviridae', 143), ('Iridoviridae', 25), ('Phycodnaviridae', 17), ('Mimiviridae', 14), ('Marseilleviridae', 5)]
ViPhOG10795	204	204		[('Siphoviridae', 137), ('Myoviridae', 39), ('Podoviridae', 26)]
ViPhOG02936	203	115	vFam_5196_0_78(5) vFam_518_0_93(5) vFam_955_7_91(4)	[('Baculoviridae', 194), ('Nudiviridae', 6), ('Poxviridae', 2), ('Hytrosaviridae', 1)]
ViPhOG09974	203	201	NA	[('Siphoviridae', 201), ('Myoviridae', 1)]
ViPhOG00631	203	203	NA	[('Adenoviridae', 203)]
ViPhOG00942	202	202	Prokaryotic(1) membrane(1) lipoprotein(1) lipid(1) attachment(1) site(1) profile(1) Terminase(157) small(161) subunit(161)	[('Siphoviridae', 104), ('Podoviridae', 38), ('Myoviridae', 20)]
ViPhOG00661	200	200	vFam_568_96_127(3) vFam_468_1_53(47) vFam_568_111_115(1) vFam_155_1_103(55) vFam_1861_109_128(1) vFam_2361_178_213(14) vFam_1495_73_113(7) vFam_2360_47_66(75) vFam_1861_75_92(86) vFam_568_133_151(5)	[('Adenoviridae', 200)]
ViPhOG04707	199	195	Lysozyme(1) subfamily(1) 2(1) Mannosyl(1) glycoprotein(1) endo(1) beta(1) N(1) acetylglucosaminidase(1) Peptidase(193) family(193) M23(193)	[('Siphoviridae', 118), ('Myoviridae', 58), ('Podoviridae', 11)]
ViPhOG00901	199	147		[('Siphoviridae', 141), ('Myoviridae', 30), ('Podoviridae', 17)]
ViPhOG03133	198	95	Protein(196) of(196) unknown(196) function(196) (DUF3627)(196)	[('Baculoviridae', 129), ('Mimiviridae', 25), ('Poxviridae', 20), ('Iridoviridae', 15), ('Ascoviridae', 9)]
ViPhOG05519	198	198	NA	[('Siphoviridae', 159), ('Myoviridae', 24), ('Podoviridae', 4)]
ViPhOG10824	198	197	vFam_1137_160_274(1) vFam_1137_291_408(1)	[('Siphoviridae', 175), ('Myoviridae', 23)]
ViPhOG00207	194	194		[('Hepadnaviridae', 194)]
ViPhOG10843	193	193	NA	[('Siphoviridae', 193)]
ViPhOG00629	191	191	NA	[('Adenoviridae', 191)]
ViPhOG00626	191	191	Adenovirus(191) hexon(191) associated(191) protein(191) (IX)(191)	[('Adenoviridae', 191)]
ViPhOG04627	190	182	SURP(1) motif(1) repeat(1) profile(1) AAA(176) domain(176)	[('Myoviridae', 128), ('Siphoviridae', 26), ('Mimiviridae', 19), ('Baculoviridae', 8), ('Marseilleviridae', 2), ('Phycodnaviridae', 2), ('Ascoviridae', 1), ('Iridoviridae', 1)]
ViPhOG11169	190	142		[('Siphoviridae', 189), ('Myoviridae', 1)]
ViPhOG12390	190	190	Phage(24) Terminase(24)	[('Siphoviridae', 189)]
ViPhOG03328	189	189	NA	[('Coronaviridae', 189)]
ViPhOG05609	188	188	Putative(188) phage(188) tail(188) protein(188)	[('Siphoviridae', 147), ('Podoviridae', 2), ('Myoviridae', 2)]
ViPhOG00177	188	187	TT(186) viral(186) orf(186) 1(186) Basic(1) leucine(1) zipper(1) (bZIP)(1) domain(1) signature(1)	[('Anelloviridae', 188)]
ViPhOG00627	186	186	NA	[('Adenoviridae', 186)]
ViPhOG00652	186	186		[('Adenoviridae', 186)]
ViPhOG00659	186	186	Adenovirus(184) 15(184) 3kD(184) protein(184) in(184) E3(184) region(184)	[('Adenoviridae', 186)]
ViPhOG00617	186	184		[('Adenoviridae', 186)]
ViPhOG11939	186	186	NA	[('Myoviridae', 184)]
ViPhOG03875	185	184	endonuclease(1) TopoisomeraseII(184) Histidine(176) kinase(176) ,(176) and(176) HSP90(176) like(176) ATPase(176) DNA(184) gyrase(183) subunit(57) B(183) Toprim(69) domain(119) Topoisomerase(58) II(184) family(184) signature(184) Intein(2) C(100)	[('Myoviridae', 123), ('Phycodnaviridae', 16), ('Mimiviridae', 14), ('Asfarviridae', 9), ('Iridoviridae', 9), ('Marseilleviridae', 5), ('Siphoviridae', 5), ('Poxviridae', 1)]
ViPhOG00646	185	185	NA	[('Adenoviridae', 185)]
ViPhOG11018	185	185	Beta(185) lactamase(185)	[('Siphoviridae', 162), ('Myoviridae', 23)]
ViPhOG00935	185	185	Archaeal(3) holliday(3) junction(3) resolvase(3) (hjc)(3)	[('Siphoviridae', 124), ('Myoviridae', 21), ('Podoviridae', 19)]
ViPhOG04650	184	107	NA	[('Myoviridae', 174), ('Siphoviridae', 5), ('Podoviridae', 1)]
ViPhOG03253	183	129	NA	[('Baculoviridae', 50), ('Siphoviridae', 28), ('Myoviridae', 23), ('Poxviridae', 21), ('Iridoviridae', 21), ('Mimiviridae', 12), ('Marseilleviridae', 9), ('Ascoviridae', 7), ('Podoviridae', 6)]
ViPhOG01591	183	182	guanylyltransferase(3) mRNA(180) capping(180) enzyme(180) N(3)	[('Poxviridae', 142), ('Mimiviridae', 14), ('Phycodnaviridae', 10), ('Asfarviridae', 9), ('Marseilleviridae', 5), ('Coronaviridae', 1)]
ViPhOG00666	182	182	NA	[('Adenoviridae', 182)]
ViPhOG00017	182	172	vFam_1109_167_306(6) vFam_692_99_126(6) vFam_1835_28_52(2) vFam_1156_155_181(6) vFam_3285_24_145(6) vFam_3989_46_62(6) vFam_3544_215_343(6) vFam_1835_224_281(4) vFam_53_253_334(6) vFam_692_316_368(4) vFam_3989_303_377(6) vFam_1156_232_295(6) vFam_3537_240_310(6)	[('Herpesviridae', 182)]
ViPhOG00665	181	181	Mastadenovirus(181) E4(181) ORF3(181) protein(181)	[('Adenoviridae', 181)]
ViPhOG03013	181	144	methylase(29) N12(73) class(73) N6(73) adenine(73) specific(136) DNA(136) methyltransferase(73) signature(136) Eco57I(29)	[('Myoviridae', 115), ('Siphoviridae', 20), ('Phycodnaviridae', 16), ('Podoviridae', 13), ('Mimiviridae', 2)]
ViPhOG02418	179	179	Baculoviridae(115) late(115) expression(115) factor(178) 5(115) C(115) terminal(115) domain(115)	[('Baculoviridae', 112), ('Iridoviridae', 35), ('Phycodnaviridae', 8), ('Nudiviridae', 5), ('Mimiviridae', 5), ('Marseilleviridae', 5), ('Ascoviridae', 2), ('Poxviridae', 1), ('Hytrosaviridae', 1), ('Asfarviridae', 1)]
ViPhOG04947	179	177	Calcineurin(100) like(100) phosphoesterase(100) superfamily(87) domain(87)	[('Siphoviridae', 84), ('Myoviridae', 74), ('Podoviridae', 1)]
ViPhOG05507	179	179	cellular(12) activities(12) AAA(172) domain(172) phage_P_loop:(28) phage(28) nucleotide(28) binding(29) region(1)	[('Siphoviridae', 110), ('Podoviridae', 48), ('Myoviridae', 7)]
ViPhOG00664	178	178	Mastadenovirus(178) early(178) E4(178) 13(178) kDa(178) protein(178)	[('Adenoviridae', 178)]
ViPhOG01731	177	99	NA	[('Poxviridae', 177)]
ViPhOG04528	177	175		[('Myoviridae', 159), ('Podoviridae', 6), ('Siphoviridae', 6), ('Poxviridae', 2), ('Iridoviridae', 2)]
ViPhOG00657	177	177		[('Adenoviridae', 177)]
ViPhOG00125	176	176	NA	[('Herpesviridae', 176)]
ViPhOG00103	176	176	Protein(176) of(176) unknown(176) function(176) (DUF587)(176)	[('Herpesviridae', 176)]
ViPhOG06137	176	127	endonuclease(1) Intron(96) encoded(96) nuclease(96) repeat(96) motif(95) NUMOD1(31) domain(31)	[('Myoviridae', 94), ('Siphoviridae', 25), ('Mimiviridae', 21), ('Podoviridae', 17), ('Phycodnaviridae', 8), ('Marseilleviridae', 7)]
ViPhOG00104	176	176	Herpesvirus(176) U59(176) protein(176)	[('Herpesviridae', 176)]
ViPhOG00074	176	176	NA	[('Herpesviridae', 176)]
ViPhOG00110	176	176	Herpesvirus(176) UL17(176) protein(176)	[('Herpesviridae', 176)]
ViPhOG00061	176	176	NA	[('Herpesviridae', 176)]
ViPhOG11097	175	108	NA	[('Siphoviridae', 175)]
ViPhOG00134	175	175	Cytomegalovirus(174) glycoprotein(174) L(174)	[('Herpesviridae', 175)]
ViPhOG04408	175	175	Histidine(94) kinase(94) ,(94) and(94) HSP90(94) like(94) ATPase(94)	[('Myoviridae', 132), ('Podoviridae', 32), ('Siphoviridae', 8)]
ViPhOG00933	175	132	SRD(1) ANTI(1) SIGMA(1) FACTOR(1) DDA(1) MODA(1)	[('Myoviridae', 125), ('Siphoviridae', 29), ('Podoviridae', 12)]
ViPhOG00051	175	175	NA	[('Herpesviridae', 175)]
ViPhOG00378	174	174	Paramyxovirus(174) nucleocapsid(174) protein(174)	[('Paramyxoviridae', 174)]
ViPhOG00057	174	174	Caspase(1) family(1) p20(1) domain(1) profile(1) Herpes(171) virus(171) tegument(171) protein(171) U30(171)	[('Herpesviridae', 174)]
ViPhOG00658	174	174		[('Adenoviridae', 174)]
ViPhOG01708	173	170	Nucleopolyhedrovirus(151) p26(151) protein(151)	[('Baculoviridae', 87), ('Poxviridae', 86)]
ViPhOG00386	173	173	Haemagglutinin(173) neuraminidase(173) Lectin(2) domain(2) of(2) ricin(2) B(2) chain(2) profile(2)	[('Paramyxoviridae', 173)]
ViPhOG00383	173	173	Viral(173) matrix(173) protein(173) MATRIX(173) VIRAL(173) M(173) ENVELOPE(173) MEMBRANE(173) STRUCTURAL(173) PHOSPHORYLATION(173) POTEIN(173) ASSOSIATED(173) ANGREM52(173)	[('Paramyxoviridae', 173)]
ViPhOG01195	173	172	domain(1) signature(132) 1(102) Bacteriophage(131) type(131) RNA(173) polymerase(173) N(141) terminal(141) Basic(1)	[('Podoviridae', 146), ('Siphoviridae', 9), ('Myoviridae', 5)]
ViPhOG01008	172	157	NA	[('Arteriviridae', 171)]
ViPhOG00123	172	172	NA	[('Herpesviridae', 172)]
ViPhOG01537	172	171	elongation(8) factor(161) S(161) II(161) (TFIIS),(12) central(27) domain(27) profile(158) C2C2(158) Zinc(158) finger(158) TFIIS(158) type(157) signature(149)	[('Poxviridae', 136), ('Phycodnaviridae', 14), ('Mimiviridae', 13), ('Asfarviridae', 9)]
ViPhOG00022	172	172	Herpesvirus(172) U5(172) like(172) family(172)	[('Herpesviridae', 172)]
ViPhOG00083	172	172	Herpes(172) virus(172) U44(172) protein(172)	[('Herpesviridae', 172)]
ViPhOG05536	171	79	YHYH(62) protein(62)	[('Myoviridae', 163), ('Phycodnaviridae', 4), ('Siphoviridae', 1)]
ViPhOG00107	171	171	NA	[('Herpesviridae', 171)]
ViPhOG00983	171	171	NA	[('Siphoviridae', 113), ('Podoviridae', 52), ('Myoviridae', 3), ('Iridoviridae', 1)]
ViPhOG00059	171	171	NA	[('Herpesviridae', 171)]
ViPhOG06379	171	109		[('Herpesviridae', 171)]
ViPhOG00088	171	171	NA	[('Herpesviridae', 171)]
ViPhOG00027	171	171	Protein(171) of(171) unknown(171) function(171) (DUF570)(171)	[('Herpesviridae', 171)]
ViPhOG04678	170	169		[('Myoviridae', 132), ('Podoviridae', 28), ('Siphoviridae', 8)]
ViPhOG01399	170	164		[('Herpesviridae', 169), ('Poxviridae', 1)]
ViPhOG00126	170	170	NA	[('Herpesviridae', 170)]
ViPhOG04636	170	169	NA	[('Myoviridae', 102), ('Siphoviridae', 25), ('Podoviridae', 14), ('Mimiviridae', 13), ('Marseilleviridae', 5), ('Sphaerolipoviridae', 3)]
ViPhOG00115	170	170		[('Herpesviridae', 170)]
ViPhOG00329	170	168		[('Rhabdoviridae', 170)]
ViPhOG00434	169	169	NA	[('Betaflexiviridae', 169)]
ViPhOG00037	169	169	Betaherpesvirus(167) immediate(167) early(167) glycoprotein(167) UL37(167)	[('Herpesviridae', 169)]
ViPhOG00048	168	168	vFam_997_127_321(7) vFam_784_143_255(7) vFam_691_18_133(7) vFam_1156_162_282(5) vFam_1001_52_159(5) vFam_4613_248_332(5) vFam_1835_221_314(5)	[('Herpesviridae', 168)]
ViPhOG10989	168	143	NA	[('Siphoviridae', 113), ('Myoviridae', 51)]
ViPhOG04057	167	163	NA	[('Herpesviridae', 167)]
ViPhOG00052	167	167	NA	[('Herpesviridae', 167)]
ViPhOG00640	167	167	NA	[('Adenoviridae', 167)]
ViPhOG04008	167	167	NA	[('Herpesviridae', 167)]
ViPhOG00223	167	141	NA	[('Polyomaviridae', 167)]
ViPhOG08349	167	164	DNA(167) binding(167) recombinase(167) domain(167) profile(167) Recombinase(162)	[('Siphoviridae', 147), ('Myoviridae', 3), ('Podoviridae', 1)]
ViPhOG00112	167	167	NA	[('Herpesviridae', 167)]
ViPhOG00060	167	167		[('Herpesviridae', 167)]
ViPhOG00281	167	167	Prokaryotic(7) membrane(7) lipoprotein(7) lipid(7) attachment(7) site(7) profile(7) 7kD(166) viral(166) coat(166) protein(166)	[('Betaflexiviridae', 108), ('Alphaflexiviridae', 59)]
ViPhOG00131	166	166	HSV(166) U79(166) /(166) HCMV(166) P34(166)	[('Herpesviridae', 166)]
ViPhOG04692	166	166	protease(1) ATP(149) binding(149) subunit(1) signature(3) Bacterial(4) dnaA(2) protein(152) ATPases(46) associated(46) with(46) a(46) variety(46) of(47) DNA(1)	[('Siphoviridae', 99), ('Myoviridae', 37), ('Podoviridae', 19), ('Parvoviridae', 1)]
ViPhOG01100	165	165		[('Herpesviridae', 149), ('Poxviridae', 15), ('Alloherpesviridae', 1)]
ViPhOG04014	165	164	NA	[('Herpesviridae', 165)]
ViPhOG00268	164	164	WCCH(164) motif(164)	[('Geminiviridae', 164)]
ViPhOG00140	164	164	Herpes(164) virus(164) intermediate/early(164) protein(164) 2/3(164)	[('Herpesviridae', 164)]
ViPhOG04124	163	163	US22(163) like(163)	[('Herpesviridae', 163)]
ViPhOG10016	163	117	Restriction(1) endonuclease(1)	[('Siphoviridae', 160), ('Myoviridae', 1)]
ViPhOG01580	163	163	Pox(160) virus(160) entry(160) fusion(160) complex(160) G9/A16(160)	[('Poxviridae', 141), ('Iridoviridae', 21), ('Ascoviridae', 1)]
ViPhOG00289	163	162		[('Retroviridae', 147), ('Siphoviridae', 8), ('Podoviridae', 3), ('Myoviridae', 2), ('Polydnaviridae', 1)]
ViPhOG03994	163	163	vFam_855_1_143(7) vFam_2238_26_145(4) vFam_820_44_79(4)	[('Herpesviridae', 163)]
ViPhOG04059	162	162	G(154) protein(154) coupled(154) receptors(154) family(154) 1(154) profile(154) 7(4) transmembrane(4) receptor(4) (rhodopsin(4) family)(4)	[('Herpesviridae', 162)]
ViPhOG10903	162	120	NA	[('Siphoviridae', 135), ('Myoviridae', 27)]
ViPhOG06170	162	161	Bacteriophage(31) peptidoglycan(31) hydrolase(31)	[('Myoviridae', 115), ('Siphoviridae', 35), ('Podoviridae', 8)]
ViPhOG01012	162	158	NA	[('Arteriviridae', 161)]
ViPhOG08746	161	144		[('Siphoviridae', 87), ('Myoviridae', 49), ('Podoviridae', 8)]
ViPhOG01201	160	160	NA	[('Podoviridae', 146)]
ViPhOG04052	160	160	NA	[('Herpesviridae', 160)]
ViPhOG06080	160	160	Type(40) VI(40) secretion(40) system,(40) phage(50) baseplate(50) assembly(50) protein(52) V(50) Bacteriophage(12)	[('Myoviridae', 158)]
ViPhOG00326	160	160	07/84(160) OA(160) B(160) 10/84(160) GM(160) P(160) 10/85(160) HD(160) B1(160) Rhabdovirus(160) nucleocapsid(160) protein(160) NUCLEOPROTEIN(160) VIRAL(160) NUCLEOCAPSID(160) STRAIN(160) N(160) NP(160) 3D(160)	[('Rhabdoviridae', 160)]
ViPhOG04004	159	159	NA	[('Herpesviridae', 159)]
ViPhOG01500	159	94		[('Poxviridae', 159)]
ViPhOG01031	159	159	Envelope(6) glycoprotein(159) GP(6) 5(6) ENVELOPE(159) GLYCOPROTEIN(153) GP5(153) MAJOR(153) GLYCOSYLATED(153) ORF5(159) TRUNCATED(153) STRUCTURAL(153) PRIMARY(153) ORF(153)	[('Arteriviridae', 158)]
ViPhOG04054	159	156	NA	[('Herpesviridae', 159)]
ViPhOG08555	159	150	NA	[('Herpesviridae', 159)]
ViPhOG04033	158	158	NA	[('Herpesviridae', 158)]
ViPhOG01013	158	158	Arterivirus(158) nonstructural(158) protein(158) 7(158) alpha(158)	[('Arteriviridae', 157)]
ViPhOG00293	158	158		[('Caulimoviridae', 103), ('Retroviridae', 55)]
ViPhOG01023	158	158	NA	[('Arteriviridae', 157)]
ViPhOG01022	158	158	NA	[('Arteriviridae', 157)]
ViPhOG01017	158	158		[('Arteriviridae', 157)]
ViPhOG01033	158	158	Arterivirus(158) nucleocapsid(158) protein(158)	[('Arteriviridae', 157)]
ViPhOG01032	158	158	GP6(152) VPX(152) RESPIRATORY(152) Arterivirus(158) GL(158) envelope(158) glycoprotein(158) MATRIX(152) MEMBRANE(152) M(158) VIRAL(152) ENVELOPE(158) ORF6(158) NON(152)	[('Arteriviridae', 157)]
ViPhOG01010	158	158	Equine(158) arteritis(158) virus(158) serine(158) endopeptidase(158) S32(158) Arterivirus(158) nsp4(158) proteinase(158) domain(158) profile(158)	[('Arteriviridae', 157)]
ViPhOG12753	157	157	NA	[('Myoviridae', 154)]
ViPhOG01193	156	156	NA	[('Siphoviridae', 93), ('Myoviridae', 31), ('Podoviridae', 28)]
ViPhOG01275	156	154	NA	[('Adenoviridae', 156)]
ViPhOG00421	156	104	Trypsin(1) like(1) peptidase(1) domain(1)	[('Luteoviridae', 109), ('Alvernaviridae', 2), ('Barnaviridae', 1), ('Coronaviridae', 1)]
ViPhOG01588	156	156		[('Poxviridae', 143), ('Mimiviridae', 7), ('Myoviridae', 3), ('Phycodnaviridae', 3)]
ViPhOG00137	155	155	Herpes(155) virus(155) intermediate/early(155) protein(155) 2/3(155)	[('Herpesviridae', 155)]
ViPhOG00700	154	154	S7,(154) Flavivirus(154) DEAD(154) like(154) helicases(154) superfamily(154) Superfamilies(154) 1(154) 56(154) and(154) EC(154) 2(154) helicase(154) C(154) terminal(154) domain(154) flavi_E_stem:(152)	[('Flaviviridae', 154)]
ViPhOG00900	154	154		[('Siphoviridae', 84), ('Myoviridae', 45), ('Podoviridae', 18)]
ViPhOG01192	154	154	NA	[('Siphoviridae', 92), ('Myoviridae', 31), ('Podoviridae', 28)]
ViPhOG01315	153	153	NA	[('Picornaviridae', 153)]
ViPhOG00654	153	153		[('Adenoviridae', 153)]
ViPhOG01015	153	152	cysteine(152) protease(152) beta(152) (PCPbeta)(152) domain(152) profile(152) Equine(153) arteritis(153) virus(153) putative(153) proteinase(153) Arterivirus(152) papain(152)	[('Arteriviridae', 153)]
ViPhOG00225	153	151	Polyomavirus(151) coat(151) protein(151)	[('Polyomaviridae', 153)]
ViPhOG04128	153	152	Ig(24) like(24) domain(99) profile(24) Immunoglobulin(97) C(18) Type(18) Immunoglobulins(4) and(4) major(4)	[('Herpesviridae', 147), ('Poxviridae', 6)]
ViPhOG00024	153	153		[('Herpesviridae', 153)]
ViPhOG12493	152	152	NA	[('Siphoviridae', 150)]
ViPhOG01025	152	152	Arteriviridae(152) metal(152) binding(152) (AV(152) MBD)(152) domain(152) profile(152)	[('Arteriviridae', 152)]
ViPhOG01030	152	152		[('Arteriviridae', 152)]
ViPhOG11107	152	152	Fibronectin(48) type(48) III(48) domain(48) profile(48)	[('Siphoviridae', 152)]
ViPhOG01026	151	151	NA	[('Arteriviridae', 151)]
ViPhOG01312	151	150	Foot(151) and(151) mouth(151) virus(151) L(151) proteinase(151)	[('Picornaviridae', 151)]
ViPhOG10941	151	151	NA	[('Siphoviridae', 148), ('Myoviridae', 2)]
ViPhOG01204	150	149	NA	[('Podoviridae', 128)]
ViPhOG01856	149	139	SIGNAL(1) tape_meas_lam_C:(82) phage(82) tail(82) tape(82) measure(82) protein(82) (Tape_meas_lam_C)(82)	[('Siphoviridae', 108), ('Myoviridae', 36), ('Podoviridae', 2)]
ViPhOG06227	149	148	Nicotinate(146) phosphoribosyltransferase(146) (NAPRTase)(146) family(146)	[('Myoviridae', 129), ('Siphoviridae', 17), ('Podoviridae', 2)]
ViPhOG04634	148	148	RNA_lig_T4_1:(91) RNA(145) ligase(145)	[('Myoviridae', 130), ('Baculoviridae', 9), ('Siphoviridae', 4), ('Malacoherpesviridae', 1), ('Ascoviridae', 1), ('Iridoviridae', 1)]
ViPhOG08567	148	148	NA	[('Herpesviridae', 148)]
ViPhOG12897	148	122	NA	[('Myoviridae', 146)]
ViPhOG08579	147	147	NA	[('Herpesviridae', 147)]
ViPhOG08557	147	141	NA	[('Herpesviridae', 147)]
ViPhOG04438	147	147	Phosphoribosyl(1) ATP(1) pyrophosphohydrolase(1)	[('Myoviridae', 77), ('Siphoviridae', 56), ('Podoviridae', 8)]
ViPhOG11106	147	147	NA	[('Siphoviridae', 146)]
ViPhOG08558	147	147	Cytomegalovirus(147) UL84(147) protein(147)	[('Herpesviridae', 147)]
ViPhOG06401	147	147	vFam_3272_68_192(2) vFam_1109_178_279(2) vFam_3537_28_144(2) vFam_691_16_157(1) vFam_1156_17_130(1) vFam_997_18_129(2) vFam_1156_17_131(1) vFam_3285_36_137(2) vFam_1001_49_153(1) vFam_53_120_165(1)	[('Herpesviridae', 147)]
ViPhOG10028	147	147	NA	[('Siphoviridae', 105), ('Myoviridae', 42)]
ViPhOG08582	147	142	NA	[('Herpesviridae', 147)]
ViPhOG01548	146	135	NA	[('Poxviridae', 146)]
ViPhOG06144	146	146	Phage(146) terminase(146) large(146) subunit(146) (GpA)(146)	[('Myoviridae', 92), ('Siphoviridae', 42), ('Podoviridae', 1)]
ViPhOG12822	146	146	Domain(146) of(146) unknown(146) function(146) (DUF4815)(146)	[('Myoviridae', 144)]
ViPhOG05608	146	146	NA	[('Siphoviridae', 100), ('Myoviridae', 6), ('Podoviridae', 2)]
ViPhOG12848	145	145	Major(143) capsid(143) protein(143) Gp23(143)	[('Myoviridae', 143)]
ViPhOG01313	145	145	NA	[('Picornaviridae', 145)]
ViPhOG06397	145	144	US22(144) like(144)	[('Herpesviridae', 145)]
ViPhOG00432	145	145	NA	[('Betaflexiviridae', 145)]
ViPhOG00633	145	145	vFam_204_0_46(13) vFam_5566_196_236(3) vFam_451_127_157(3) vFam_821_184_219(3) vFam_235_112_149(3) vFam_1892_455_493(3)	[('Adenoviridae', 145)]
ViPhOG08486	145	145	vFam_151_33_124(1) vFam_6222_42_108(40) vFam_4771_127_344(4) vFam_151_30_87(2)	[('Herpesviridae', 145)]
ViPhOG04484	145	129	motif(1) profile(102) Anaerobic(145) ribonucleoside(145) triphosphate(145) reductase(145) Glycine(103) radical(103) domain(104) signature(88)	[('Myoviridae', 118), ('Siphoviridae', 22), ('Podoviridae', 2)]
ViPhOG03147	145	138		[('Baculoviridae', 100), ('Mimiviridae', 13), ('Iridoviridae', 12), ('Marseilleviridae', 10), ('Ascoviridae', 4), ('Phycodnaviridae', 2), ('Siphoviridae', 1)]
ViPhOG01578	145	145	Poxvirus/kinetoplastid(144) type(144) ribose(144) 2prima(144) O(144) methyltransferase(144) (EC(144) 2(144) 1(144) 57)(144) family(144) profile(144) Poly(144) A(144) polymerase(144) regulatory(144) subunit(144)	[('Poxviridae', 142), ('Mimiviridae', 2)]
ViPhOG08581	145	145	NA	[('Herpesviridae', 145)]
ViPhOG08494	145	145	NA	[('Herpesviridae', 145)]
ViPhOG05788	144	136	autotrans_barl:(1) outer(1) membrane(41) protein(40) beta(40) barrel(41) domain(41)	[('Myoviridae', 124), ('Podoviridae', 4)]
ViPhOG12875	144	103	NA	[('Myoviridae', 143)]
ViPhOG12414	144	144	1(3) Protein(139) of(139) unknown(139) function(139) (DUF2746)(139) GENE(140) GP30(140) GP35(140) GP55(140) GP31(140) GP5(140) PHAGE(140) RELATED(140) Asparaginase(3)	[('Siphoviridae', 143)]
ViPhOG12821	144	144	Domain(142) of(142) unknown(142) function(142) (DUF4815)(142)	[('Myoviridae', 142)]
ViPhOG08509	144	144	vFam_784_131_282(132) vFam_4613_212_356(1) vFam_997_183_262(1) vFam_1156_229_300(132) vFam_1109_243_302(3) vFam_53_270_333(126)	[('Herpesviridae', 144)]
ViPhOG01314	144	144	NA	[('Picornaviridae', 144)]
ViPhOG00653	144	140		[('Adenoviridae', 144)]
ViPhOG08491	144	140	vFam_4770_26_277(1) vFam_4028_131_359(1)	[('Herpesviridae', 144)]
ViPhOG06386	144	144	NA	[('Herpesviridae', 144)]
ViPhOG01571	144	144	Lipid(142) membrane(142) protein(142) of(142) large(142) eukaryotic(142) DNA(142) viruses(142)	[('Poxviridae', 144)]
ViPhOG00607	144	135	phage_pRha:(75) phage(75) regulatory(141) protein(141) Rha(141) (Phage_pRha)(141)	[('Siphoviridae', 83), ('Podoviridae', 27), ('Myoviridae', 24)]
ViPhOG01614	143	143	Poxvirus(142) rifampicin(142) resistance(142) protein(142)	[('Poxviridae', 143)]
ViPhOG01586	143	143		[('Poxviridae', 143)]
ViPhOG01584	143	143		[('Poxviridae', 143)]
ViPhOG01612	143	143	subunit(136) MRNA(142) CAPPING(142) ENZYME(142) SUBUNIT(142) SMALL(142) METHYLTRANSFERASE(142) TRANSFERASE(142) PROCESSING(142) GUANINE(142) N7(142) ORF074(142) Poxvirus(136)	[('Poxviridae', 143)]
ViPhOG08490	143	143	NA	[('Herpesviridae', 143)]
ViPhOG01557	143	143		[('Poxviridae', 143)]
ViPhOG01620	143	143	Poxvirus(142) P4B(142) major(142) core(142) protein(142)	[('Poxviridae', 143)]
ViPhOG01558	143	142		[('Poxviridae', 129), ('Mimiviridae', 14)]
ViPhOG00720	143	143	Parvovirus(134) coat(134) protein(134) VP1(134)	[('Parvoviridae', 141), ('Poxviridae', 1), ('Circoviridae', 1)]
ViPhOG01651	143	143	Poxvirus(139) intermediate(139) transcription(139) factor(139)	[('Poxviridae', 143)]
ViPhOG01626	143	143	Poxvirus(142) early(142) transcription(142) factor(142) (VETF),(142) large(142) subunit(142)	[('Poxviridae', 143)]
ViPhOG01640	143	143	Pox(143) virus(143) entry(143) fusion(143) complex(143) G9/A16(143)	[('Poxviridae', 141), ('Ascoviridae', 1), ('Mimiviridae', 1)]
ViPhOG01574	143	143	Poxvirus(140) L3/FP4(140) protein(140)	[('Poxviridae', 143)]
ViPhOG01533	143	143		[('Poxviridae', 143)]
ViPhOG01619	143	143	Poxvirus(142) Late(142) Transcription(142) Factor(142) VLTF3(142) like(142)	[('Poxviridae', 143)]
ViPhOG02543	143	143		[('Poxviridae', 143)]
ViPhOG08526	143	143	NA	[('Herpesviridae', 143)]
ViPhOG08512	143	143	NA	[('Herpesviridae', 143)]
ViPhOG06388	142	142	vFam_2620_18_448(2) vFam_2491_36_249(80) vFam_837_227_340(64) vFam_2491_24_62(2)	[('Herpesviridae', 142)]
ViPhOG06385	142	142	Inhibitor(141) of(141) apoptosis(141) promoting(141) Bax1(141)	[('Herpesviridae', 142)]
ViPhOG08599	142	142	NA	[('Herpesviridae', 142)]
ViPhOG06398	142	142	Herpes(141) like(141) virus(141) membrane(141) glycoprotein(141) UL141(141)	[('Herpesviridae', 142)]
ViPhOG12465	142	142	MAJOR(142) GP23(142) GP20(142) CAPSID(142) STRUCTURAL(142) COAT(142) TAIL(142) GP19(142) DIRECT(142) SEQUENCING(142)	[('Siphoviridae', 141)]
ViPhOG00176	142	130	Prokaryotic(22) membrane(22) lipoprotein(22) lipid(22) attachment(22) site(22) profile(22) TT(121) viral(121) ORF2(121)	[('Anelloviridae', 142)]
ViPhOG01523	142	142	Poxvirus(142) serine/threonine(142) protein(142) kinases(142) active(142) site(142) signature(142)	[('Poxviridae', 142)]
ViPhOG01569	142	142	vFam_1418_0_205(1) vFam_371_0_200(6) vFam_1418_0_207(5) vFam_371_0_201(4) vFam_4916_89_107(1)	[('Poxviridae', 142)]
ViPhOG01570	142	142	Pox(141) virus(141) entry(141) fusion(141) complex(141) G9/A16(141)	[('Poxviridae', 142)]
ViPhOG12464	142	142	GP22(136) GP19(136) GENE(136) GP18(136)	[('Siphoviridae', 141)]
ViPhOG05683	142	141	NA	[('Myoviridae', 118), ('Podoviridae', 5)]
ViPhOG01630	142	142	Poxvirus(135) P4A(135) protein(135)	[('Poxviridae', 142)]
ViPhOG04483	142	137	biosynthesis(1) protein(103) 4Fe(141) 4S(141) single(141) cluster(141) domain(141) Radical(88) activating(102) enzymes(74)	[('Myoviridae', 111), ('Siphoviridae', 25), ('Podoviridae', 1)]
ViPhOG12471	142	142	Protein(142) of(142) unknown(142) function(142) (DUF2744)(142)	[('Siphoviridae', 140)]
ViPhOG08488	142	142	NA	[('Herpesviridae', 142)]
ViPhOG08541	142	142	NA	[('Herpesviridae', 142)]
ViPhOG04606	142	142	NA	[('Myoviridae', 131), ('Siphoviridae', 6), ('Podoviridae', 2)]
ViPhOG01727	142	100	site(13) profile(115) Interleukin(135) 1(135) binding(134) protein(134) precursor(134) signature(135) Ig(102) like(102) domain(120) Immunoglobulin(117) C(36)	[('Poxviridae', 141), ('Myoviridae', 1)]
ViPhOG01639	142	142	vFam_266_0_223(113) vFam_6666_50_60(2) vFam_6666_31_51(2) vFam_371_117_186(97) vFam_6697_20_32(15) vFam_6697_10_31(16)	[('Poxviridae', 142)]
ViPhOG01522	141	141	Lipid(141) membrane(141) protein(141) of(141) large(141) eukaryotic(141) DNA(141) viruses(141)	[('Poxviridae', 141)]
ViPhOG08492	141	141	UL120(141) GLYCOPROTEIN(141) ORF(141) BOLF3(141) PRECURSOR(141) RH154(141) SIGNAL(141)	[('Herpesviridae', 141)]
ViPhOG06392	141	141		[('Herpesviridae', 141)]
ViPhOG08478	141	141	NA	[('Herpesviridae', 141)]
ViPhOG08594	141	141	UL42(141) MEMBRANE(141) TRANSMEMBRANE(141) GLYCOPROTEIN(141) RH68(141)	[('Herpesviridae', 141)]
ViPhOG01617	141	141	motif(135) TRANSCRIPTION(138) LATE(138) FACTOR(138) VLTF(138) 2(138) TRANS(138) ACTIVATOR(138) REGULATION(138) A1L(138) ORF076(138) Poxvirus(134)	[('Poxviridae', 141)]
ViPhOG08511	141	141	NA	[('Herpesviridae', 141)]
ViPhOG08556	141	141	NA	[('Herpesviridae', 141)]
ViPhOG12468	141	141	GP25(135) GENE(135) GP22(135)	[('Siphoviridae', 140)]
ViPhOG00978	141	139	UvrD(78) like(78) helicase(78) C(78) terminal(78) domain(78)	[('Myoviridae', 45), ('Baculoviridae', 33), ('Podoviridae', 23), ('Mimiviridae', 14), ('Siphoviridae', 9), ('Iridoviridae', 5), ('Marseilleviridae', 5), ('Poxviridae', 2), ('Ascoviridae', 2), ('Hytrosaviridae', 1), ('Alloherpesviridae', 1)]
ViPhOG06387	141	141	NA	[('Herpesviridae', 141)]
ViPhOG01559	141	141	NA	[('Poxviridae', 141)]
ViPhOG06384	141	141	NA	[('Herpesviridae', 141)]
ViPhOG06383	141	141	NA	[('Herpesviridae', 141)]
ViPhOG14228	141	139	NA	[('Siphoviridae', 139), ('Myoviridae', 1)]
ViPhOG11121	141	100	NA	[('Siphoviridae', 140), ('Myoviridae', 1)]
ViPhOG08578	141	141	Inhibitor(109) of(109) apoptosis(109) promoting(109) Bax1(109)	[('Herpesviridae', 141)]
ViPhOG12463	141	141	GP21(134) GENE(134) GP18(134) GP17(134)	[('Siphoviridae', 140)]
ViPhOG02532	141	141	family(138) ORF(139) G6R(139) 56R(139) G6(139) RPXV073(139) FPV119(139) SPV053(139) ORF8R(139) CPXV094(139) MPXV(139) COP(139) 070(139) Permuted(138)	[('Poxviridae', 141)]
ViPhOG01634	141	141	Poxvirus(140) A11(140) Protein(140)	[('Poxviridae', 141)]
ViPhOG08518	141	141	NA	[('Herpesviridae', 141)]
ViPhOG01597	141	141	NA	[('Poxviridae', 141)]
ViPhOG01604	141	141	NA	[('Poxviridae', 141)]
ViPhOG06382	141	141	Inhibitor(140) of(140) apoptosis(140) promoting(140) Bax1(140)	[('Herpesviridae', 141)]
ViPhOG08495	140	140	Cytomegalovirus(140) IE1(140) protein(140)	[('Herpesviridae', 140)]
ViPhOG08542	140	140	NA	[('Herpesviridae', 140)]
ViPhOG08505	140	140	NA	[('Herpesviridae', 140)]
ViPhOG08520	140	140	NA	[('Herpesviridae', 140)]
ViPhOG03286	140	139		[('Baculoviridae', 111), ('Poxviridae', 8), ('Mimiviridae', 7), ('Marseilleviridae', 4), ('Iridoviridae', 2), ('Phycodnaviridae', 2), ('Retroviridae', 1)]
ViPhOG08507	140	140	UL20(140) GLYCOPROTEIN(140) TRANSMEMBRANE(140) MEMBRANE(140) PRECURSOR(140) RH36(140) SIGNAL(140)	[('Herpesviridae', 140)]
ViPhOG00999	139	139	NA	[('Adenoviridae', 139)]
ViPhOG06389	139	139	US30(138) HHRF5(138)	[('Herpesviridae', 139)]
ViPhOG01503	139	112	dsDNA(138) Poxvirus(138)	[('Poxviridae', 139)]
ViPhOG04668	139	139		[('Myoviridae', 125), ('Mimiviridae', 7), ('Siphoviridae', 4), ('Poxviridae', 1), ('Marseilleviridae', 1)]
ViPhOG06193	139	139	Rad50(31) zinc(31) hook(31) motif(31)	[('Myoviridae', 124), ('Siphoviridae', 13)]
ViPhOG06372	139	139	Glycoprotein(137) UL132(137)	[('Herpesviridae', 139)]
ViPhOG01021	139	136		[('Arteriviridae', 139)]
ViPhOG01027	139	139	PRRSV(138) putative(138) envelope(138) protein(138)	[('Arteriviridae', 139)]
ViPhOG08480	139	139	NA	[('Herpesviridae', 139)]
ViPhOG08572	138	137	CMV(138) US(138)	[('Herpesviridae', 138)]
ViPhOG00469	138	137	NA	[('Coronaviridae', 138)]
ViPhOG01560	138	138	Metallopeptidase(135) from(135) vaccinia(135) pox(135)	[('Poxviridae', 138)]
ViPhOG01590	138	138	mRNA(138) capping(138) enzyme(138) N(138) terminal,(138) ATPase(138) and(138) guanylyltransferase(138)	[('Poxviridae', 138)]
ViPhOG00471	138	138	NA	[('Coronaviridae', 138)]
ViPhOG01028	138	138	protein(137) ENVELOPE(138) GP3(138) GLYCOPROTEIN(138) ORF3(138) GI:(138) NCBI(138) NONSTRUCTURAL(138) GLYCOSYLATED(138) TRUNCATED(138) ORF(138) Arterivirus(137)	[('Arteriviridae', 138)]
ViPhOG01019	138	138		[('Arteriviridae', 138)]
ViPhOG01962	138	138		[('Siphoviridae', 76), ('Podoviridae', 38), ('Myoviridae', 10)]
ViPhOG01007	138	138	NA	[('Arteriviridae', 138)]
ViPhOG08479	138	138	NA	[('Herpesviridae', 138)]
ViPhOG06393	138	138	Inhibitor(134) of(134) apoptosis(134) promoting(134) Bax1(134)	[('Herpesviridae', 138)]
ViPhOG08591	138	138	NA	[('Herpesviridae', 138)]
ViPhOG10839	138	138	PD(1) (D/E)XK(1) nuclease(1) superfamily(1)	[('Siphoviridae', 138)]
ViPhOG08514	137	137	NA	[('Herpesviridae', 137)]
ViPhOG00470	137	137	Spike(137) receptor(137) binding(137) domain(137)	[('Coronaviridae', 137)]
ViPhOG01565	137	137	METAL(133) BINDING(133) ZINC(133) TRANSCRIPTION(133)	[('Poxviridae', 137)]
ViPhOG03171	137	113		[('Baculoviridae', 134), ('Iridoviridae', 3)]
ViPhOG10120	137	137	NA	[('Herpesviridae', 137)]
ViPhOG06371	137	137	NA	[('Herpesviridae', 137)]
ViPhOG08568	137	137	NA	[('Herpesviridae', 137)]
ViPhOG08519	137	137	NA	[('Herpesviridae', 137)]
ViPhOG08337	137	137		[('Siphoviridae', 115), ('Myoviridae', 5), ('Podoviridae', 3)]
ViPhOG01011	137	137	NA	[('Arteriviridae', 137)]
ViPhOG01024	137	137	NA	[('Arteriviridae', 137)]
ViPhOG10165	136	126	NA	[('Herpesviridae', 136)]
ViPhOG10169	136	136	Herpes(135) like(135) virus(135) membrane(135) glycoprotein(135) UL141(135)	[('Herpesviridae', 136)]
ViPhOG01599	136	136	NA	[('Poxviridae', 136)]
ViPhOG01199	136	122	Phage(71) T7(71) capsid(71) assembly(71) protein(71)	[('Podoviridae', 116)]
ViPhOG08540	136	136	NA	[('Herpesviridae', 136)]
ViPhOG01585	136	136	Glycosyltransferase(1) family(1) 25(1) (LPS(1) biosynthesis(1) protein)(1)	[('Poxviridae', 136)]
ViPhOG01576	136	136	Poxvirus(132) J1(134) F7(134) DIMERIC(134) MF7(134) J1R(134) 65R(134)	[('Poxviridae', 136)]
ViPhOG06366	136	136	NA	[('Herpesviridae', 136)]
ViPhOG06373	136	136	NA	[('Herpesviridae', 136)]
ViPhOG01564	136	136	Poxvirus(135) G5(135) protein(135)	[('Poxviridae', 136)]
ViPhOG08586	136	136	Cytomegalovirus(133) US3(133) protein(133)	[('Herpesviridae', 136)]
ViPhOG01554	136	136		[('Poxviridae', 136)]
ViPhOG01550	136	136		[('Poxviridae', 136)]
ViPhOG08523	136	135	Prokaryotic(2) membrane(2) lipoprotein(2) lipid(2) attachment(2) site(2) profile(2) UL4(135) EARLY(135) GLYCOPROTEIN(135) GP48(135) MEMBRANE(135) PRECURSOR(135) SIGNAL(135)	[('Herpesviridae', 136)]
ViPhOG12457	136	136	GP16(90) SCAFFOLD(90) HEAD(90) PROBABLE(90) ASSEMBLY(90) GP13(90) SEQUENCING(90) DIRECT(90) Domain(3) of(3) unknown(3) function(3) (DUF4355)(3)	[('Siphoviridae', 135)]
ViPhOG01540	136	136	Pox(133) virus(133) E6(133) protein(133)	[('Poxviridae', 136)]
ViPhOG01675	136	136	Chordopoxvirus(134) A30L(134) protein(134)	[('Poxviridae', 136)]
ViPhOG00603	136	134		[('Podoviridae', 92), ('Siphoviridae', 32), ('Myoviridae', 3)]
ViPhOG00723	136	135		[('Parvoviridae', 136)]
ViPhOG12877	136	136	NA	[('Myoviridae', 134)]
ViPhOG01624	136	136		[('Poxviridae', 136)]
ViPhOG01645	136	136	Poxvirus(134) A21(134) Protein(134)	[('Poxviridae', 136)]
ViPhOG01886	135	132		[('Siphoviridae', 104), ('Myoviridae', 9), ('Podoviridae', 4)]
ViPhOG01629	135	135	MEMBRANE(134) IMV(134) A10L(134) A9(134) protein(134) conserved(134) region(134)	[('Poxviridae', 135)]
ViPhOG08577	135	135	Cytomegalovirus(135) US3(135) protein(135)	[('Herpesviridae', 135)]
ViPhOG01566	135	135		[('Poxviridae', 135)]
ViPhOG01628	135	135		[('Poxviridae', 135)]
ViPhOG01635	135	133		[('Poxviridae', 135)]
ViPhOG01600	135	135	Poxvirus(122) D5(122) protein(122) like(122)	[('Poxviridae', 135)]
ViPhOG01625	135	135	Poxvirus(134) A6(134) protein(134)	[('Poxviridae', 135)]
ViPhOG12461	135	135	GP20(134) GENE(134) GP17(134) GP16(134)	[('Siphoviridae', 134)]
ViPhOG01641	135	135	Poxvirus(133) P21(133) membrane(133) protein(133)	[('Poxviridae', 135)]
ViPhOG01605	135	135	ORF070(135) Poxvirus(135) DNA(135) DIRECTED(135) SUBUNIT(135) RPO18(135) POLYPEPTIDE(135) TRANSFERASE(135) TRANSCRIPTION(135)	[('Poxviridae', 135)]
ViPhOG01563	135	135	Glutaredoxin(133) like(133) domain(133) (DUF836)(133)	[('Poxviridae', 135)]
ViPhOG01562	135	135		[('Poxviridae', 135)]
ViPhOG02533	135	135		[('Poxviridae', 135)]
ViPhOG02535	135	135	MEMBRANE(133) TRANSMEMBRANE(133) L5(133) protein(133) family(133)	[('Poxviridae', 135)]
ViPhOG01673	135	135	NUCLEOTIDYLTRANSFERASE(135) ORF106(135) Poxvirus(135) DNA(135) DIRECTED(135) SUBUNIT(135) RPO35(135) POLYPEPTIDE(135) TRANSFERASE(135)	[('Poxviridae', 135)]
ViPhOG01555	135	135	Poxvirus(134) I6(134) like(134) family(134)	[('Poxviridae', 135)]
ViPhOG01552	135	135		[('Poxviridae', 135)]
ViPhOG01575	135	135	CORE(134) DNA(134) BINDING(134) VP8(134) VIRION(134) STRUCTURAL(134) MAJOR(134) PRECURSOR(134) LATE(134) P25K(134) ORF050(134) Poxvirus(134) nucleic(134) acid(134) binding(134) protein(134) VP8/L4R(134)	[('Poxviridae', 135)]
ViPhOG06369	135	135	HCMV(134) glycoprotein(134) pUL130(134)	[('Herpesviridae', 135)]
ViPhOG01543	135	135		[('Poxviridae', 135)]
ViPhOG01534	135	135	Poxviridae(134) protein(134)	[('Poxviridae', 135)]
ViPhOG01593	135	135	Pox(134) virus(134) D2(134) protein(134)	[('Poxviridae', 135)]
ViPhOG01572	134	134	NA	[('Poxviridae', 134)]
ViPhOG01642	134	134	NA	[('Poxviridae', 134)]
ViPhOG12486	134	134	NA	[('Siphoviridae', 133)]
ViPhOG01646	134	134	Chordopoxvirus(133) A20R(133) protein(133)	[('Poxviridae', 134)]
ViPhOG01647	134	134	NA	[('Poxviridae', 134)]
ViPhOG08503	134	134	Class(134) I(134) Histocompatibility(134) antigen,(134) domains(134) alpha(134) 1(134) and(134) 2(134) Immunoglobulin(2)	[('Herpesviridae', 133), ('Poxviridae', 1)]
ViPhOG01527	134	134		[('Poxviridae', 134)]
ViPhOG01551	134	134	Poxvirus(133) entry(133) protein(133) complex(133) L1(133) and(133) I2(133)	[('Poxviridae', 134)]
ViPhOG12487	134	134	GENE(117) GP53(117) GP49(117) GP45(117) GP48(117)	[('Siphoviridae', 133)]
ViPhOG12459	134	134	Phage(134) protein(134) Gp19/Gp15/Gp42(134)	[('Siphoviridae', 133)]
ViPhOG01644	134	134		[('Poxviridae', 134)]
ViPhOG10036	134	134		[('Siphoviridae', 132), ('Myoviridae', 1)]
ViPhOG08552	134	134	Assemblin(132) (Peptidase(132) family(132) S21)(132)	[('Herpesviridae', 134)]
ViPhOG01618	134	134	A2L(134) zinc(134) ribbon(134) domain(134)	[('Poxviridae', 134)]
ViPhOG04561	134	133	DNA(128) GP2(128) LIKE(128) T4(128) ENDS(128) PROTECTS(128) PROTECTING(128)	[('Myoviridae', 132)]
ViPhOG01014	134	134	NA	[('Arteriviridae', 134)]
ViPhOG01596	134	134	NA	[('Poxviridae', 134)]
ViPhOG01637	134	134	Prokaryotic(2) membrane(2) lipoprotein(2) lipid(2) attachment(2) site(2) profile(2) Poxvirus(134) virion(134) envelope(134) protein(134) A14(134)	[('Poxviridae', 134)]
ViPhOG01579	133	133		[('Poxviridae', 133)]
ViPhOG12763	133	93	NA	[('Myoviridae', 131)]
ViPhOG06367	133	133	UL124(132) GLYCOPROTEIN(132)	[('Herpesviridae', 133)]
ViPhOG08513	133	133	NA	[('Herpesviridae', 133)]
ViPhOG08545	133	133	vFam_460_309_346(39) vFam_3349_6_39(26)	[('Herpesviridae', 133)]
ViPhOG06378	133	133	RL11(132) GLYCOPROTEIN(132) VIRAL(132) RECEPTOR(132) LIKE(132) GP34(132) FC(132) BINDING(132)	[('Herpesviridae', 133)]
ViPhOG02530	133	133	Poxvirus(130) F12L(130) protein(130)	[('Poxviridae', 133)]
ViPhOG02538	133	133		[('Poxviridae', 133)]
ViPhOG06402	133	133	NA	[('Herpesviridae', 133)]
ViPhOG12186	133	133	NA	[('Myoviridae', 117), ('Phycodnaviridae', 8), ('Siphoviridae', 3), ('Podoviridae', 2)]
ViPhOG01983	133	132	Domain(98) of(98) unknown(98) function(98) (DUF4355)(98)	[('Siphoviridae', 119), ('Podoviridae', 10)]
ViPhOG01531	133	133		[('Poxviridae', 133)]
ViPhOG01589	133	133	Late(132) protein(132) H7(132)	[('Poxviridae', 133)]
ViPhOG06381	133	133	US16(132) TRANSMEMBRANE(132) GLYCOPROTEIN(132) MEMBRANE(132) HVLF2(132) Inhibitor(130) of(130) apoptosis(130) promoting(130) Bax1(130)	[('Herpesviridae', 133)]
ViPhOG00302	133	133	NA	[('Hepeviridae', 133)]
ViPhOG12489	133	133	GENE(133) GP52(133) GP44(133) GP51(133) GP47(133) GP48(133)	[('Siphoviridae', 132)]
ViPhOG08521	132	132	vFam_4306_7_54(99) vFam_229_4_74(1) vFam_2654_54_96(1) vFam_3349_11_82(61)	[('Herpesviridae', 132)]
ViPhOG08529	132	132	NA	[('Herpesviridae', 132)]
ViPhOG08597	132	132	NA	[('Herpesviridae', 132)]
ViPhOG08510	132	132	NA	[('Herpesviridae', 132)]
ViPhOG01561	132	132	Chordopoxvirus(132) G3(132) protein(132)	[('Poxviridae', 132)]
ViPhOG08565	132	132	NA	[('Herpesviridae', 132)]
ViPhOG08524	132	132	Glycoprotein(125) of(125) human(125) cytomegalovirus(125) HHV(125) 5(125)	[('Herpesviridae', 132)]
ViPhOG08537	132	132	NA	[('Herpesviridae', 132)]
ViPhOG08484	132	132	UL10(132) GLYCOPROTEIN(132) TRANSMEMBRANE(132) MEMBRANE(132)	[('Herpesviridae', 132)]
ViPhOG08522	132	132	US22(132) like(132)	[('Herpesviridae', 132)]
ViPhOG08592	132	132	Cytomegalovirus(132) TRL10(132) protein(132)	[('Herpesviridae', 132)]
ViPhOG08516	132	132	Herpesvirus(132) large(132) structural(132) phosphoprotein(132) UL32(132)	[('Herpesviridae', 132)]
ViPhOG08544	132	132	NA	[('Herpesviridae', 132)]
ViPhOG12480	132	132	GP39(132) GENE(132) GP40(132) GP42(132) GP41(132)	[('Siphoviridae', 131)]
ViPhOG08502	132	132	NA	[('Herpesviridae', 132)]
ViPhOG08580	132	132	NA	[('Herpesviridae', 132)]
ViPhOG08574	132	132	US16(132) TRANSMEMBRANE(132) GLYCOPROTEIN(132) MEMBRANE(132) HVLF2(132) Inhibitor(132) of(132) apoptosis(132) promoting(132) Bax1(132)	[('Herpesviridae', 132)]
ViPhOG08575	132	132	NA	[('Herpesviridae', 132)]
ViPhOG08562	132	132	NA	[('Herpesviridae', 132)]
ViPhOG08559	132	132	NA	[('Herpesviridae', 132)]
ViPhOG00467	132	132	Protein(34) of(34) unknown(34) function(34) (DUF3655)(34)	[('Coronaviridae', 132)]
ViPhOG08576	132	132	NA	[('Herpesviridae', 132)]
ViPhOG06399	132	132	Prokaryotic(33) membrane(33) lipoprotein(33) lipid(33) attachment(33) site(33) profile(33) UL16(131) GLYCOPROTEIN(131) PRECURSOR(131) SIGNAL(131)	[('Herpesviridae', 132)]
ViPhOG08501	132	132	NA	[('Herpesviridae', 132)]
ViPhOG06390	132	132	US34(131) HHRF8(131)	[('Herpesviridae', 132)]
ViPhOG08477	132	132	NA	[('Herpesviridae', 132)]
ViPhOG08500	132	132	NA	[('Herpesviridae', 132)]
ViPhOG08549	132	132	NA	[('Herpesviridae', 132)]
ViPhOG08517	132	132	NA	[('Herpesviridae', 132)]
ViPhOG08596	131	131	NA	[('Herpesviridae', 131)]
ViPhOG08553	131	131	NA	[('Herpesviridae', 131)]
ViPhOG08531	131	131	NA	[('Herpesviridae', 131)]
ViPhOG08530	131	131	NA	[('Herpesviridae', 131)]
ViPhOG06391	131	131		[('Herpesviridae', 131)]
ViPhOG08525	131	131	UL41A(131) TRANSMEMBRANE(131) GLYCOPROTEIN(131) MEMBRANE(131) STRUCTURAL(131)	[('Herpesviridae', 131)]
ViPhOG08476	131	131	NA	[('Herpesviridae', 131)]
ViPhOG06400	131	131	UL21A(130) RH37(130)	[('Herpesviridae', 131)]
ViPhOG08534	131	131	NA	[('Herpesviridae', 131)]
ViPhOG08532	131	131	NA	[('Herpesviridae', 131)]
ViPhOG08487	131	131	NA	[('Herpesviridae', 131)]
ViPhOG08489	131	131	NA	[('Herpesviridae', 131)]
ViPhOG08533	131	131	NA	[('Herpesviridae', 131)]
ViPhOG06135	131	131		[('Myoviridae', 75), ('Siphoviridae', 23), ('Podoviridae', 13), ('Mimiviridae', 9)]
ViPhOG08550	131	131	NA	[('Herpesviridae', 131)]
ViPhOG08535	131	131	NA	[('Herpesviridae', 131)]
ViPhOG08508	131	131		[('Herpesviridae', 131)]
ViPhOG08566	131	131	vFam_414_8_109(45) vFam_5844_222_259(129)	[('Herpesviridae', 131)]
ViPhOG08570	131	131	TT(108) viral(108) ORF2(108)	[('Herpesviridae', 131)]
ViPhOG06374	131	131	NA	[('Herpesviridae', 131)]
ViPhOG08561	131	131	NA	[('Herpesviridae', 131)]
ViPhOG08498	131	131	NA	[('Herpesviridae', 131)]
ViPhOG08504	131	131	NA	[('Herpesviridae', 131)]
ViPhOG08538	131	131	NA	[('Herpesviridae', 131)]
ViPhOG08482	131	130	NA	[('Herpesviridae', 131)]
ViPhOG08564	131	131	NA	[('Herpesviridae', 131)]
ViPhOG08496	131	131	vFam_1068_392_469(131) vFam_229_9_67(13) vFam_434_12_59(1) vFam_3306_299_347(23) vFam_381_398_456(35) vFam_229_12_65(5)	[('Herpesviridae', 131)]
ViPhOG08506	131	131		[('Herpesviridae', 131)]
ViPhOG08563	131	131	vFam_4557_122_172(2) vFam_931_73_153(33) vFam_4557_123_171(6) vFam_4614_58_98(74) vFam_4557_127_173(21)	[('Herpesviridae', 131)]
ViPhOG08543	130	130	vFam_586_513_585(51) vFam_5505_7_28(1) vFam_1770_118_180(3) vFam_424_29_90(32) vFam_1770_124_180(38) vFam_419_241_305(26) vFam_4693_42_104(32) vFam_5505_32_54(1)	[('Herpesviridae', 130)]
ViPhOG03249	130	107	vFam_5277_0_40(5) vFam_2027_0_45(8) vFam_4485_0_57(14) vFam_308_2_29(7)	[('Baculoviridae', 123), ('Podoviridae', 5), ('Siphoviridae', 1), ('Phycodnaviridae', 1)]
ViPhOG08593	130	130	NA	[('Herpesviridae', 130)]
ViPhOG08584	130	130	NA	[('Herpesviridae', 130)]
ViPhOG01679	130	130	Chordopoxvirus(128) A33R(128) protein(128)	[('Poxviridae', 130)]
ViPhOG00624	130	130	Adenovirus(130) E1B(130) protein(130) N(130) terminus(130)	[('Adenoviridae', 130)]
ViPhOG08515	130	130	NA	[('Herpesviridae', 130)]
ViPhOG00458	130	130	Nucleic(130) acid(130) binding(130) domain(130) (NAR)(130)	[('Coronaviridae', 130)]
ViPhOG08595	130	130	NA	[('Herpesviridae', 130)]
ViPhOG08551	130	130	NA	[('Herpesviridae', 130)]
ViPhOG12866	129	118	NA	[('Myoviridae', 127)]
ViPhOG08571	129	129	US10(129) GLYCOPROTEIN(129) VIRAL(129) TRANSMEMBRANE(129) MEMBRANE(129) GPUS10(129) HXLF2(129) IMMUNOEVASION(129) PRECURSOR(129) SHORT(129)	[('Herpesviridae', 129)]
ViPhOG10148	129	129	NA	[('Herpesviridae', 129)]
ViPhOG01587	129	129		[('Poxviridae', 129)]
ViPhOG10134	129	129	NA	[('Herpesviridae', 129)]
ViPhOG00431	129	129	Viral(126) coat(126) protein(129) (S(126) domain)(126) Icosahedral(87) viral(87) capsid(111) proteins(84) primaSprima(84) region(84) signature(108) Plant(84)	[('Tombusviridae', 84), ('Nodaviridae', 3), ('Circoviridae', 1)]
ViPhOG08573	129	129	NA	[('Herpesviridae', 129)]
ViPhOG10141	129	129	NA	[('Herpesviridae', 129)]
ViPhOG08485	129	129	NA	[('Herpesviridae', 129)]
ViPhOG12873	129	129		[('Myoviridae', 123), ('Phycodnaviridae', 4)]
ViPhOG10132	129	129	NA	[('Herpesviridae', 129)]
ViPhOG06395	129	129	NA	[('Herpesviridae', 129)]
ViPhOG08585	129	129	Prokaryotic(129) membrane(129) lipoprotein(129) lipid(129) attachment(129) site(129) profile(129)	[('Herpesviridae', 129)]
ViPhOG10140	129	129	NA	[('Herpesviridae', 129)]
ViPhOG10139	129	129	NA	[('Herpesviridae', 129)]
ViPhOG10138	129	129	NA	[('Herpesviridae', 129)]
ViPhOG08497	129	129	NA	[('Herpesviridae', 129)]
ViPhOG11122	129	102	NA	[('Siphoviridae', 117), ('Myoviridae', 10)]
ViPhOG01535	129	129	deaminases(96) DRADA(116) repeat(116) profile(128) Double(128) stranded(128) RNA(128) binding(128) domain(128) in(96)	[('Poxviridae', 128), ('Iridoviridae', 1)]
ViPhOG05882	128	128		[('Myoviridae', 117), ('Podoviridae', 6)]
ViPhOG00475	128	128		[('Coronaviridae', 128)]
ViPhOG02004	128	128		[('Siphoviridae', 92), ('Myoviridae', 29), ('Podoviridae', 5)]
ViPhOG10168	128	128	NA	[('Herpesviridae', 128)]
ViPhOG10163	128	128	vFam_2094_113_182(40) vFam_2307_229_282(15) vFam_431_28_73(121) vFam_96_18_43(1) vFam_3843_35_68(17)	[('Herpesviridae', 128)]
ViPhOG10147	128	128	Prokaryotic(128) membrane(128) lipoprotein(128) lipid(128) attachment(128) site(128) profile(128)	[('Herpesviridae', 128)]
ViPhOG04453	128	128		[('Siphoviridae', 65), ('Myoviridae', 53), ('Podoviridae', 9)]
ViPhOG00304	128	128	NA	[('Hepeviridae', 128)]
ViPhOG10149	128	128	NA	[('Herpesviridae', 128)]
ViPhOG08589	128	128	CMV(128) US(128)	[('Herpesviridae', 128)]
ViPhOG10133	128	128	Human(128) Cytomegalovirus(128) UL139(128) protein(128)	[('Herpesviridae', 128)]
ViPhOG08539	127	127	NA	[('Herpesviridae', 127)]
ViPhOG07210	127	114	Glycosyltransferase(54) family(54) 25(54) (LPS(54) biosynthesis(54) protein)(54)	[('Siphoviridae', 66), ('Myoviridae', 26), ('Mimiviridae', 26), ('Poxviridae', 7), ('Phycodnaviridae', 2)]
ViPhOG12851	127	127	NA	[('Myoviridae', 124)]
ViPhOG08587	127	127	GLYCOPROTEIN(127) US6(127) VIRAL(127) TRANSMEMBRANE(127) GPUS6(127) MEMBRANE(127) EARLY(127) IMMUNOEVASION(127) PRECURSOR(127) SHORT(127)	[('Herpesviridae', 127)]
ViPhOG12495	127	127	GP63(69) GENE(69)	[('Siphoviridae', 126)]
ViPhOG00444	127	122	NA	[('Coronaviridae', 127)]
ViPhOG10150	127	127	NA	[('Herpesviridae', 127)]
ViPhOG01493	127	120	Poxvirus(126) C7/F8A(126) protein(126)	[('Poxviridae', 127)]
ViPhOG10166	127	127	Class(1) I(1) Histocompatibility(1) antigen,(1) domains(1) alpha(1) 1(1) and(1) 2(1)	[('Herpesviridae', 127)]
ViPhOG10135	127	127	NA	[('Herpesviridae', 127)]
ViPhOG10137	127	127	NA	[('Herpesviridae', 127)]
ViPhOG04426	126	116	NA	[('Myoviridae', 89), ('Siphoviridae', 9), ('Phycodnaviridae', 8), ('Podoviridae', 5), ('Mimiviridae', 1)]
ViPhOG03203	126	87	NA	[('Baculoviridae', 126)]
ViPhOG00369	126	126	Beta(116) satellite(116) pathogenicity(116) beta(116) C1(116) protein(116)	[('Myoviridae', 10)]
ViPhOG10131	126	126	Prokaryotic(5) membrane(5) lipoprotein(5) lipid(5) attachment(5) site(5) profile(5)	[('Herpesviridae', 126)]
ViPhOG02450	126	125	Primase(126) C(126) terminal(126) 2(126) (PriCT(126) 2)(126)	[('Iridoviridae', 35), ('Siphoviridae', 21), ('Podoviridae', 16), ('Mimiviridae', 14), ('Myoviridae', 8), ('Asfarviridae', 8), ('Marseilleviridae', 5), ('Ascoviridae', 2), ('Phycodnaviridae', 1)]
ViPhOG08499	126	126	NA	[('Herpesviridae', 126)]
ViPhOG02531	126	126		[('Poxviridae', 126)]
ViPhOG01595	126	126	Chordopoxvirinae(125) D3(125) protein(125)	[('Poxviridae', 126)]
ViPhOG03290	126	116	ssDNA(126) binding(126) protein(126)	[('Baculoviridae', 126)]
ViPhOG06375	125	125	NA	[('Herpesviridae', 125)]
ViPhOG02949	125	125	ORF50(121) LDORF(121) 143(121) PXORF29(121) Protein(125) of(125) unknown(125) function(125) (DUF666)(125) ORF115(121) PEPTIDE(121) ACMNPV(121) SIMILAR(121) ORF105(121)	[('Baculoviridae', 117), ('Nudiviridae', 6), ('Hytrosaviridae', 2)]
ViPhOG12879	125	121	NA	[('Myoviridae', 123)]
ViPhOG00294	125	125		[('Retroviridae', 125)]
ViPhOG10167	125	125	Prokaryotic(125) membrane(125) lipoprotein(125) lipid(125) attachment(125) site(125) profile(125)	[('Herpesviridae', 125)]
ViPhOG01616	125	125	NA	[('Poxviridae', 125)]
ViPhOG00751	125	125	NA	[('Herpesviridae', 95), ('Inoviridae', 27), ('Podoviridae', 2)]
ViPhOG01547	125	125		[('Poxviridae', 125)]
ViPhOG08588	125	124	CMV(125) US(125)	[('Herpesviridae', 125)]
ViPhOG12883	124	124		[('Myoviridae', 116), ('Podoviridae', 5)]
ViPhOG04837	124	123		[('Myoviridae', 68), ('Siphoviridae', 53)]
ViPhOG02541	124	124	Protein(123) of(123) unknown(123) function(123) (DUF1029)(123)	[('Poxviridae', 124)]
ViPhOG00453	124	124	NA	[('Coronaviridae', 124)]
ViPhOG02933	124	124	Baculoviridae(123) P74(123) N(123) terminal(123)	[('Baculoviridae', 116), ('Nudiviridae', 6), ('Hytrosaviridae', 2)]
ViPhOG01725	124	123	dsDNA(120) Poxvirus(120)	[('Poxviridae', 124)]
ViPhOG03629	124	124	vFam_92_92_292(4) vFam_103_101_151(1) vFam_2243_115_240(3)	[('Circoviridae', 13), ('Nanoviridae', 3), ('Phycodnaviridae', 1)]
ViPhOG10142	124	124	NA	[('Herpesviridae', 124)]
ViPhOG02959	123	123	Baculovirus(123) hypothetical(123) protein(123)	[('Baculoviridae', 117), ('Nudiviridae', 6)]
ViPhOG12809	123	123	NA	[('Myoviridae', 121)]
ViPhOG00622	123	123	NA	[('Adenoviridae', 123)]
ViPhOG03375	123	122		[('Siphoviridae', 54), ('Myoviridae', 50), ('Tectiviridae', 5), ('Podoviridae', 4)]
ViPhOG01660	123	63	NA	[('Poxviridae', 122), ('Myoviridae', 1)]
ViPhOG02422	123	84		[('Phycodnaviridae', 43), ('Iridoviridae', 36), ('Mimiviridae', 27), ('Asfarviridae', 8), ('Marseilleviridae', 5), ('Ascoviridae', 4)]
ViPhOG03198	123	102	helical(64) domain(64) Baculovirus(122) E66(122) occlusion(122) derived(122) virus(122) envelope(122) protein(122)	[('Baculoviridae', 122), ('Nudiviridae', 1)]
ViPhOG02939	122	122	Baculovirus(116) protein(116) of(116) unknown(116) function(116) (DUF845)(116)	[('Baculoviridae', 116), ('Nudiviridae', 6)]
ViPhOG08583	122	122	NA	[('Herpesviridae', 122)]
ViPhOG02934	122	122	Baculoviridae(122) p74(122) conserved(122) region(122)	[('Baculoviridae', 116), ('Nudiviridae', 6)]
ViPhOG12820	122	122	Bacteriophage(4) T4,(4) Gp8(4)	[('Myoviridae', 120)]
ViPhOG04546	122	61	NA	[('Myoviridae', 122)]
ViPhOG01638	121	121		[('Poxviridae', 121)]
ViPhOG06997	121	70	Probable(66) transposase(118) DNA(114) binding(114) domain(114)	[('Mimiviridae', 37), ('Myoviridae', 33), ('Siphoviridae', 13), ('Phycodnaviridae', 11), ('Baculoviridae', 8), ('Ascoviridae', 5), ('Bicaudaviridae', 4), ('Nudiviridae', 1), ('Inoviridae', 1)]
ViPhOG00844	121	121	NA	[('Herpesviridae', 121)]
ViPhOG12823	121	121	NA	[('Myoviridae', 119)]
ViPhOG12901	121	120	NA	[('Myoviridae', 119)]
ViPhOG01525	121	121	Poxvirus(121) F11(121) protein(121)	[('Poxviridae', 121)]
ViPhOG02536	121	121	D5(121) N(121) terminal(121) like(121)	[('Poxviridae', 121)]
ViPhOG12852	121	121	Protein(121) of(121) unknown(121) function(121) (DUF3110)(121)	[('Myoviridae', 117), ('Phycodnaviridae', 2)]
ViPhOG03754	121	120	factor(32) signature(40) Bacterial(118) DNA(118) binding(118) protein(118) bacterial(74) (prokaryotic)(74) histone(74) like(74) domain(74) Prokaryotic(32)	[('Myoviridae', 99), ('Asfarviridae', 8), ('Siphoviridae', 6)]
ViPhOG06697	121	120	Calcineurin(79) like(79) phosphoesterase(79) superfamily(35) domain(35)	[('Myoviridae', 85), ('Siphoviridae', 25), ('Podoviridae', 8)]
ViPhOG12864	121	121		[('Myoviridae', 119)]
ViPhOG01609	120	120		[('Poxviridae', 120)]
ViPhOG12787	120	107		[('Myoviridae', 118)]
ViPhOG12854	120	120	NA	[('Myoviridae', 117), ('Siphoviridae', 1)]
ViPhOG12870	120	120	NA	[('Myoviridae', 118)]
ViPhOG01530	120	120	Poxvirus(120) F16(120) protein(120)	[('Poxviridae', 120)]
ViPhOG06226	120	101		[('Myoviridae', 102), ('Siphoviridae', 16), ('Podoviridae', 2)]
ViPhOG00625	120	120	NA	[('Adenoviridae', 120)]
ViPhOG10842	120	120	NA	[('Siphoviridae', 97), ('Myoviridae', 23)]
ViPhOG01948	119	119	Porcine(106) reproductive(106) and(106) respiratory(106) syndrome(106) virus(106) 2b(106)	[('Arteriviridae', 119)]
ViPhOG02064	119	118	Phage(96) endonuclease(96) I(96)	[('Podoviridae', 93), ('Siphoviridae', 7), ('Myoviridae', 3)]
ViPhOG02555	119	119	Poxvirus(117) A51(117) protein(117)	[('Poxviridae', 119)]
ViPhOG00122	119	119	variety(48) of(119) replication(119) binding(119) protein(119) DEAD(119) like(119) helicases(119) superfamily(119) Superfamilies(117) 1(117) and(117) 2(117)	[('Herpesviridae', 119)]
ViPhOG12826	119	118	NA	[('Myoviridae', 117)]
ViPhOG12868	119	119	NA	[('Myoviridae', 117)]
ViPhOG12860	119	119	NA	[('Myoviridae', 117)]
ViPhOG12847	119	119	NA	[('Myoviridae', 117)]
ViPhOG04871	119	119	D14(105) PHAGE(105) GP54(105) SPO1(105) GENE(105) ORF78(105) ORF063(105) ORF064(105)	[('Myoviridae', 81), ('Siphoviridae', 21)]
ViPhOG01636	119	119	VIRION(3) MEMBRANE(3) ORF089(3) IMV(3) CNPV251(3) FPV178(3) MC117L(3) ORTHOLOGUE(3) A13L(103) protein(103)	[('Poxviridae', 119)]
ViPhOG01689	118	118	CD47(117) immunoglobulin(117) like(117) domain(117) profile(12)	[('Poxviridae', 118)]
ViPhOG04725	118	118	N(118) acetylmuramoyl(118) L(118) alanine(118) amidase(118) Sporulation(2) related(2) domain(2)	[('Siphoviridae', 68), ('Myoviridae', 25), ('Podoviridae', 9), ('Tectiviridae', 2)]
ViPhOG03224	118	118		[('Baculoviridae', 117), ('Nudiviridae', 1)]
ViPhOG00277	118	94	NA	[('Alphaflexiviridae', 117)]
ViPhOG02954	118	118	88(116) Baculovirus(117) 19(117) kDa(117) protein(117) conserved(117) region(117) PEPTIDE(116) ACMNPV(116) ORF97(116) ORF96(116) SIMILAR(116) P143(116) LEF5(116)	[('Baculoviridae', 113), ('Nudiviridae', 5)]
ViPhOG02554	118	93	Poxvirus(118) B22R(118) protein(118) C(118) terminal(118)	[('Poxviridae', 113), ('Alloherpesviridae', 5)]
ViPhOG12888	118	118	NA	[('Myoviridae', 116)]
ViPhOG02066	118	118	Gcn5(4) related(4)	[('Podoviridae', 79)]
ViPhOG12810	118	118	YHYH(118) protein(118)	[('Myoviridae', 116)]
ViPhOG00435	118	109	NA	[('Betaflexiviridae', 118)]
ViPhOG01512	118	105	Serine(89) aminopeptidase,(89) S33(89) Alpha/beta(76) hydrolase(76) family(29)	[('Poxviridae', 85), ('Mimiviridae', 25), ('Phycodnaviridae', 4)]
ViPhOG12467	118	118	NA	[('Siphoviridae', 117)]
ViPhOG03208	118	118		[('Baculoviridae', 117), ('Nudiviridae', 1)]
ViPhOG01514	117	117		[('Poxviridae', 117)]
ViPhOG12782	117	117	NA	[('Myoviridae', 116)]
ViPhOG01878	117	117	NA	[('Siphoviridae', 89), ('Myoviridae', 10), ('Podoviridae', 3)]
ViPhOG00932	117	106	PAS(8) repeat(8) profile(8)	[('Myoviridae', 32), ('Podoviridae', 31), ('Siphoviridae', 29), ('Mimiviridae', 18)]
ViPhOG03219	117	117	Baculovirus(117) P33(117) ERV/ALR(1) sulfhydryl(1) oxidase(1) domain(1) profile(1)	[('Baculoviridae', 117)]
ViPhOG19955	117	117	NA	[('Myoviridae', 114), ('Podoviridae', 1)]
ViPhOG03221	117	117	Late(117) expression(117) factor(117) 4(117) (LEF(117) 4)(117)	[('Baculoviridae', 117)]
ViPhOG12867	117	117	NA	[('Myoviridae', 115)]
ViPhOG04558	117	117	2prima(1) 5prima(1) RNA(1) ligase(1) superfamily(1)	[('Myoviridae', 112), ('Siphoviridae', 4)]
ViPhOG03273	117	117	Late(117) expression(117) factor(117) 8(117) (LEF(117) 8)(117) RNA(110) polymerases(110) beta(110) chain(110) signature(110)	[('Baculoviridae', 117)]
ViPhOG03149	117	117	Eukaryotic(97) and(97) archaeal(97) DNA(97) primase(97) small(97) subunit(97)	[('Baculoviridae', 117)]
ViPhOG03298	117	116		[('Baculoviridae', 114), ('Poxviridae', 2), ('Myoviridae', 1)]
ViPhOG03274	117	117	NA	[('Baculoviridae', 117)]
ViPhOG03113	117	117	Baculoviral(117) E56(117) protein,(117) specific(117) to(117) ODV(117) envelope(117)	[('Baculoviridae', 117)]
ViPhOG03265	117	117	Baculovirus(117) VP1054(117) protein(117)	[('Baculoviridae', 117)]
ViPhOG03168	117	117	Per(117) os(117) infectivity(117)	[('Baculoviridae', 117)]
ViPhOG03201	116	116	Protein(116) of(116) unknown(116) function(116) (DUF673)(116)	[('Baculoviridae', 116)]
ViPhOG03279	116	116		[('Baculoviridae', 116)]
ViPhOG03206	116	116	Baculovirus(113) protein(113) of(113) unknown(113) function(113) (DUF844)(113)	[('Baculoviridae', 116)]
ViPhOG04838	116	97		[('Siphoviridae', 76), ('Myoviridae', 13), ('Podoviridae', 2), ('Bicaudaviridae', 1)]
ViPhOG01720	116	116	Tissue(4) factor(4) Interferon(116) gamma(116) receptor(116) (IFNGR1)(116)	[('Poxviridae', 116)]
ViPhOG03216	116	116	Baculovirus(116) DNA(116) helicase(116)	[('Baculoviridae', 116)]
ViPhOG03232	116	116	NA	[('Baculoviridae', 116)]
ViPhOG03254	116	116	Late(116) expression(116) factor(116) 9(116) (LEF(116) 9)(116)	[('Baculoviridae', 116)]
ViPhOG01029	116	116	NA	[('Arteriviridae', 116)]
ViPhOG12505	116	116	NA	[('Siphoviridae', 115)]
ViPhOG03299	116	116	protein(116) EC27(116) ODV(116) E27(116) HOMOLOG(116) OCCLUSION(116) DERIVED(116) ORF112(116) Baculovirus(116) occlusion(116)	[('Baculoviridae', 116)]
ViPhOG03106	116	116		[('Baculoviridae', 116)]
ViPhOG03112	116	116	NA	[('Baculoviridae', 116)]
ViPhOG03301	116	116	Baculovirus(116) Y142(116) protein(116)	[('Baculoviridae', 116)]
ViPhOG03237	116	116	Protein(116) of(116) unknown(116) function(116) (DUF708)(116)	[('Baculoviridae', 116)]
ViPhOG03207	116	116	Baculoviridae(116) late(116) expression(116) factor(116) 5(116)	[('Baculoviridae', 116)]
ViPhOG06377	116	116	NA	[('Herpesviridae', 116)]
ViPhOG03230	116	116	Structural(116) glycoprotein(116) p40/gp41(116) conserved(116) region(116)	[('Baculoviridae', 116)]
ViPhOG03204	115	115	Baculovirus(115) P48(115) protein(115)	[('Baculoviridae', 115)]
ViPhOG05860	115	103		[('Myoviridae', 86), ('Siphoviridae', 23), ('Phycodnaviridae', 1)]
ViPhOG01018	115	115		[('Arteriviridae', 115)]
ViPhOG02420	115	101		[('Myoviridae', 34), ('Siphoviridae', 32), ('Iridoviridae', 24), ('Podoviridae', 8)]
ViPhOG00484	115	115	Circovirus(114) capsid(114) protein(114)	[('Circoviridae', 115)]
ViPhOG00305	115	115	STRUCTURAL(115) POLYMERASE(115) HELICASE(115) TRANSFERASE(115) NUCLEOTIDE(115) BINDING(115) Protein(115) of(115) unknown(115) function(115) (DUF3729)(115)	[('Hepeviridae', 115)]
ViPhOG06250	115	74	NA	[('Myoviridae', 110), ('Podoviridae', 1)]
ViPhOG12896	115	115	Protein(76) of(76) unknown(76) function(76) (DUF2973)(76)	[('Myoviridae', 113)]
ViPhOG08483	115	115	vFam_4693_71_114(2) vFam_2087_191_239(16) vFam_851_348_393(2) vFam_2735_186_229(15) vFam_1785_47_84(2) vFam_5914_202_243(16) vFam_2915_6_22(9) vFam_1362_24_56(2)	[('Herpesviridae', 115)]
ViPhOG03123	115	115	Prokaryotic(1) membrane(1) lipoprotein(1) lipid(1) attachment(1) site(1) profile(1) lef(115) 2(115)	[('Baculoviridae', 115)]
ViPhOG00250	115	99		[('Closteroviridae', 84), ('Mimiviridae', 29), ('Phycodnaviridae', 2)]
ViPhOG12833	115	115	NA	[('Myoviridae', 113)]
ViPhOG01502	115	115		[('Poxviridae', 115)]
ViPhOG01052	115	115	NA	[('Herpesviridae', 115)]
ViPhOG01556	115	115	Protein(115) of(115) unknown(115) function(115) (DUF3746)(115)	[('Poxviridae', 115)]
ViPhOG05194	115	115	Prophage(15) CP4(15) 57(15) regulatory(15) protein(15) (AlpA)(15)	[('Siphoviridae', 97), ('Podoviridae', 8), ('Myoviridae', 4)]
ViPhOG03194	115	115	Baculovirus(115) protein(115) of(115) unknown(115) function(115) (DUF816)(115)	[('Baculoviridae', 115)]
ViPhOG03278	114	114	NA	[('Baculoviridae', 114)]
ViPhOG06376	114	114	NA	[('Herpesviridae', 114)]
ViPhOG14233	114	114		[('Siphoviridae', 114)]
ViPhOG00412	114	114	NA	[('Potyviridae', 114)]
ViPhOG11110	114	114	NA	[('Siphoviridae', 111), ('Podoviridae', 2)]
ViPhOG12742	114	114	Domain(72) of(72) unknown(72) function(72) (DUF1825)(72)	[('Myoviridae', 112)]
ViPhOG00306	114	114	Hepatitis(114) E(114) virus(114) ORF(114) 2(114) (Putative(114) capsid(114) protein)(114) ORF3(113)	[('Hepeviridae', 114)]
ViPhOG05921	114	77		[('Mimiviridae', 42), ('Myoviridae', 28), ('Siphoviridae', 13), ('Podoviridae', 5), ('Marseilleviridae', 5), ('Hytrosaviridae', 3), ('Phycodnaviridae', 3), ('Bicaudaviridae', 2), ('Iridoviridae', 1)]
ViPhOG03229	113	113	NA	[('Baculoviridae', 113)]
ViPhOG03246	113	113	Protein(106) of(106) unknown(106) function(106) (DUF1160)(106)	[('Baculoviridae', 113)]
ViPhOG12898	113	113	NA	[('Myoviridae', 110), ('Podoviridae', 1), ('Siphoviridae', 1)]
ViPhOG03218	113	113	Protein(113) of(113) unknown(113) function(113) (DUF682)(113)	[('Baculoviridae', 113)]
ViPhOG03217	113	113		[('Baculoviridae', 113)]
ViPhOG12819	113	113	NA	[('Myoviridae', 112)]
ViPhOG03269	113	113	Baculovirus(113) U(113) box/Ring(113) like(113) domain(113)	[('Baculoviridae', 113)]
ViPhOG03181	113	112	Baculovirus(105) polyhedron(105) envelope(105) protein,(105) PEP,(105) N(105) terminus(105)	[('Baculoviridae', 113)]
ViPhOG00216	113	84		[('Luteoviridae', 113)]
ViPhOG03283	113	113		[('Baculoviridae', 113)]
ViPhOG03114	113	113	Baculoviridae(113) ME53(113)	[('Baculoviridae', 113)]
ViPhOG00345	113	113	NA	[('Retroviridae', 113)]
ViPhOG03243	113	113	Viral(113) Desmoplakin(113) N(113) terminus(113)	[('Baculoviridae', 113)]
ViPhOG05082	113	109	NA	[('Myoviridae', 64), ('Siphoviridae', 2), ('Podoviridae', 1)]
ViPhOG08590	113	113	CMV(113) US(113)	[('Herpesviridae', 113)]
ViPhOG01521	112	112		[('Poxviridae', 112)]
ViPhOG12755	112	112		[('Myoviridae', 110)]
ViPhOG03247	112	112	Baculovirus(112) protein(112) of(112) unknown(112) function(112) (DUF843)(112)	[('Baculoviridae', 112)]
ViPhOG03228	112	112	NA	[('Baculoviridae', 112)]
ViPhOG09904	112	112	NA	[('Myoviridae', 103), ('Podoviridae', 6)]
ViPhOG03225	112	112	Nucleopolyhedrovirus(100) telokin(100) like(100) protein(100) 20(100) (TLP20)(100)	[('Baculoviridae', 112)]
ViPhOG12893	112	112		[('Myoviridae', 110)]
ViPhOG03297	112	112	Nucleopolyhedrovirus(112) protein(112) of(112) unknown(112) function(112) (DUF884)(112)	[('Baculoviridae', 112)]
ViPhOG01511	112	112		[('Poxviridae', 99), ('Iridoviridae', 13)]
ViPhOG03121	112	112	Baculovirus(112) P24(112) capsid(112) protein(112)	[('Baculoviridae', 112)]
ViPhOG00943	111	111	Phage(18) portal(18) protein,(18) SPP1(18) Gp6(18) like(18)	[('Siphoviridae', 64), ('Myoviridae', 2), ('Podoviridae', 2)]
ViPhOG04569	111	105	NA	[('Myoviridae', 109)]
ViPhOG01666	111	95		[('Poxviridae', 111)]
ViPhOG12808	111	111	NA	[('Myoviridae', 109), ('Siphoviridae', 1)]
ViPhOG03255	111	111	Baculovirus(111) FP(111) protein(111)	[('Baculoviridae', 111)]
ViPhOG01683	111	111	Chordopoxvirus(110) A35R(110) protein(110)	[('Poxviridae', 111)]
ViPhOG11518	111	111		[('Myoviridae', 109), ('Siphoviridae', 1)]
ViPhOG01676	111	111	Poxvirus(102) A31(102) protein(102)	[('Poxviridae', 111)]
ViPhOG03231	110	110	Nucleopolyhedrovirus(96) protein(96) of(96) unknown(96) function(96) (DUF912)(96)	[('Baculoviridae', 110)]
ViPhOG11055	110	110	NA	[('Siphoviridae', 87), ('Myoviridae', 23)]
ViPhOG04704	110	110		[('Siphoviridae', 95), ('Podoviridae', 3)]
ViPhOG10887	110	110	NA	[('Siphoviridae', 109), ('Myoviridae', 1)]
ViPhOG12834	110	110		[('Myoviridae', 108)]
ViPhOG03205	110	110	Protein(110) of(110) unknown(110) function(110) (DUF1098)(110)	[('Baculoviridae', 110)]
ViPhOG04869	110	90	PDDEXK(66) like(66) domain(66) of(66) unknown(66) function(66) (DUF3799)(66)	[('Siphoviridae', 76), ('Myoviridae', 7), ('Podoviridae', 3)]
ViPhOG08569	110	110	vFam_771_1_51(110) vFam_116_25_58(2) vFam_354_19_45(2) vFam_1887_89_111(108)	[('Herpesviridae', 110)]
ViPhOG12804	110	110	NA	[('Myoviridae', 108)]
ViPhOG05241	109	109	t(2) SNARE(2) coiled(2) coil(2) homology(2) domain(2) profile(2) Domain(109) of(109) unknown(109) function(109) (DUF1983)(109)	[('Siphoviridae', 83), ('Podoviridae', 17), ('Myoviridae', 4)]
ViPhOG01686	109	109	Protein(108) of(108) unknown(108) function(108) (DUF1235)(108)	[('Poxviridae', 109)]
ViPhOG01507	109	109	Prokaryotic(4) membrane(4) lipoprotein(4) lipid(4) attachment(4) site(4) profile(4) Poxvirus(109) M2(109) protein(109)	[('Poxviridae', 109)]
ViPhOG03057	109	98		[('Myoviridae', 108)]
ViPhOG12801	109	109	NA	[('Myoviridae', 107)]
ViPhOG04917	109	109	NA	[('Podoviridae', 65)]
ViPhOG11103	108	108	NA	[('Siphoviridae', 108)]
ViPhOG08493	108	108	NA	[('Herpesviridae', 108)]
ViPhOG04450	108	108	NA	[('Myoviridae', 106)]
ViPhOG11104	108	108	NA	[('Siphoviridae', 108)]
ViPhOG12109	108	108	NA	[('Myoviridae', 105), ('Herpesviridae', 2)]
ViPhOG01606	108	108		[('Poxviridae', 108)]
ViPhOG11096	107	107	NA	[('Siphoviridae', 107)]
ViPhOG01975	107	89	Protein(105) of(105) unknown(105) function(105) (DUF1642)(105)	[('Siphoviridae', 80), ('Myoviridae', 18), ('Podoviridae', 6)]
ViPhOG19962	107	107	NA	[('Myoviridae', 107)]
ViPhOG03174	107	106	NA	[('Baculoviridae', 107)]
ViPhOG09202	107	61	NA	[('Parvoviridae', 107)]
ViPhOG05398	107	105	NA	[('Siphoviridae', 90), ('Podoviridae', 7), ('Iridoviridae', 2), ('Myoviridae', 1)]
ViPhOG00874	106	105	Alphaherpesvirus(106) glycoprotein(106) E(106)	[('Herpesviridae', 106)]
ViPhOG00793	106	106	Herpesvirus(95) UL17(95) protein(95)	[('Herpesviridae', 106)]
ViPhOG00790	106	106		[('Herpesviridae', 106)]
ViPhOG00813	106	106	NA	[('Herpesviridae', 106)]
ViPhOG00830	106	106	Herpesvirus(106) UL46(106) protein(106)	[('Herpesviridae', 106)]
ViPhOG00819	106	106	Herpesvirus(106) capsid(106) shell(106) protein(106) VP19C(106)	[('Herpesviridae', 106)]
ViPhOG00812	106	106	Herpesvirus(106) UL36(106) tegument(106) protein(106)	[('Herpesviridae', 106)]
ViPhOG00846	106	106	Herpesvirus(106) UL51(106) protein(106)	[('Herpesviridae', 106)]
ViPhOG12887	106	106	NA	[('Myoviridae', 105)]
ViPhOG00781	106	106	Herpesvirus(99) UL4(99) family(99)	[('Herpesviridae', 106)]
ViPhOG00847	106	106	Cell(106) fusion(106) glycoprotein(106) K(106)	[('Herpesviridae', 106)]
ViPhOG00814	106	106	NA	[('Herpesviridae', 106)]
ViPhOG00786	106	106	NA	[('Herpesviridae', 106)]
ViPhOG05811	106	106	NA	[('Myoviridae', 97)]
ViPhOG00340	106	106	Herpesvirus(106) ICP4(106) like(106) protein(106) N(106) terminal(106) region(106)	[('Herpesviridae', 106)]
ViPhOG03292	105	105	Nucleopolyhedrovirus(104) protein(104) of(104) unknown(104) function(104) (DUF919)(104)	[('Baculoviridae', 105)]
ViPhOG12871	105	105	NA	[('Myoviridae', 104)]
ViPhOG00780	105	105	Herpesvirus(105) UL3(105) protein(105)	[('Herpesviridae', 105)]
ViPhOG00708	105	105	Paramyxovirus(105) P/V(105) phosphoprotein(105) C(105) terminal(105)	[('Paramyxoviridae', 105)]
ViPhOG00437	105	105	A(2) domain(96) profile(96) Carlavirus(94) endopeptidase(94)	[('Betaflexiviridae', 104)]
ViPhOG00871	105	105	Alphaherpesvirus(105) glycoprotein(105) I(105)	[('Herpesviridae', 105)]
ViPhOG05688	105	104	NA	[('Myoviridae', 75), ('Podoviridae', 5)]
ViPhOG00835	105	105		[('Herpesviridae', 105)]
ViPhOG12872	105	105	NA	[('Myoviridae', 105)]
ViPhOG01603	105	105	NA	[('Poxviridae', 105)]
ViPhOG00816	105	105	NA	[('Herpesviridae', 105)]
ViPhOG04824	105	105	Bacteriophage(75) related(75) domain(75) of(75) unknown(75) function(75) (DUF3168)(1)	[('Siphoviridae', 80), ('Myoviridae', 2)]
ViPhOG03076	105	104		[('Myoviridae', 63), ('Siphoviridae', 32), ('Podoviridae', 7), ('Mimiviridae', 1)]
ViPhOG00795	105	105	Herpesvirus(105) UL21(105)	[('Herpesviridae', 105)]
ViPhOG05699	105	101		[('Siphoviridae', 78), ('Podoviridae', 2), ('Myoviridae', 1)]
ViPhOG03227	104	104	vFam_3564_104_159(34) vFam_89_146_202(2) vFam_3564_104_160(18) vFam_89_146_208(31) vFam_162_3_49(5) vFam_3953_178_232(17) vFam_2255_2_58(1)	[('Baculoviridae', 104)]
ViPhOG00823	104	104	NA	[('Herpesviridae', 104)]
ViPhOG03154	104	104	profile(1) UDP(104) glycosyltransferases(102) signature(102)	[('Baculoviridae', 104)]
ViPhOG00839	104	104	Herpesvirus(104) UL49(104) tegument(104) protein(104)	[('Herpesviridae', 104)]
ViPhOG00422	103	103	viruses(96) catalytic(96) domain(96) profile(96) Luteovirus(101) (ORF3)(101) RNA(102) polymerase(102) signature(101) RdRp(96) of(96) positive(96)	[('Luteoviridae', 60), ('Alvernaviridae', 2), ('Barnaviridae', 1)]
ViPhOG01695	103	103		[('Poxviridae', 103)]
ViPhOG12764	103	103	NA	[('Myoviridae', 100), ('Siphoviridae', 1)]
ViPhOG05685	103	103	NA	[('Myoviridae', 76), ('Podoviridae', 3)]
ViPhOG12455	103	103	NA	[('Siphoviridae', 103)]
ViPhOG00806	103	103	NA	[('Herpesviridae', 103)]
ViPhOG01476	103	100		[('Poxviridae', 103)]
ViPhOG04724	103	103		[('Siphoviridae', 57), ('Myoviridae', 41)]
ViPhOG02550	103	94	NA	[('Poxviridae', 98), ('Alloherpesviridae', 5)]
ViPhOG00939	103	103	Protein(12) of(12) unknown(12) function(12) (DUF2815)(12)	[('Podoviridae', 90), ('Siphoviridae', 1)]
ViPhOG01706	103	103		[('Poxviridae', 83), ('Siphoviridae', 10), ('Podoviridae', 3), ('Myoviridae', 3)]
ViPhOG01607	102	102	vFam_1419_174_196(29) vFam_2073_27_73(18) vFam_1419_62_88(8)	[('Poxviridae', 102)]
ViPhOG01573	102	102		[('Poxviridae', 102)]
ViPhOG01718	102	102	NA	[('Poxviridae', 102)]
ViPhOG11075	102	92	NA	[('Siphoviridae', 98), ('Myoviridae', 4)]
ViPhOG12765	102	102	NA	[('Myoviridae', 99), ('Siphoviridae', 1)]
ViPhOG01688	102	102	CD47(102) transmembrane(102) region(102)	[('Poxviridae', 102)]
ViPhOG06368	102	102	NA	[('Herpesviridae', 102)]
ViPhOG01960	102	97	AntA/AntB(102) antirepressor(102) IQ(1) motif(1) profile(1)	[('Siphoviridae', 65), ('Podoviridae', 25), ('Myoviridae', 6)]
ViPhOG03153	102	102	Chitin(102) binding(102) domain(102)	[('Baculoviridae', 97), ('Poxviridae', 5)]
ViPhOG03202	102	102	Protein(102) of(102) unknown(102) function(102) (DUF1443)(102)	[('Baculoviridae', 102)]
ViPhOG01694	102	102		[('Poxviridae', 102)]
ViPhOG01519	102	102		[('Poxviridae', 102)]
ViPhOG01520	102	102	Orthopoxvirus(101) F7(101) protein(101)	[('Poxviridae', 102)]
ViPhOG09108	101	101		[('Siphoviridae', 80), ('Myoviridae', 9), ('Podoviridae', 2)]
ViPhOG02442	101	43	2(101) cysteine(101) adaptor(101) domain(101)	[('Iridoviridae', 91), ('Ascoviridae', 6), ('Phycodnaviridae', 3), ('Mimiviridae', 1)]
ViPhOG06020	101	101		[('Poxviridae', 101)]
ViPhOG05192	101	101		[('Myoviridae', 79), ('Siphoviridae', 9), ('Phycodnaviridae', 7)]
ViPhOG12792	101	101	NA	[('Myoviridae', 99)]
ViPhOG12882	101	101	NA	[('Myoviridae', 96), ('Siphoviridae', 3)]
ViPhOG01643	101	101	NA	[('Poxviridae', 101)]
ViPhOG01716	101	101	ankyrin(101) repeats(101)	[('Poxviridae', 101)]
ViPhOG01016	101	101	NA	[('Arteriviridae', 101)]
ViPhOG01528	101	101		[('Poxviridae', 101)]
ViPhOG01306	101	101		[('Geminiviridae', 101)]
ViPhOG00178	101	99	NA	[('Anelloviridae', 101)]
ViPhOG19958	101	101		[('Myoviridae', 100)]
ViPhOG11153	101	101	NA	[('Siphoviridae', 98), ('Myoviridae', 2)]
ViPhOG01684	101	101		[('Poxviridae', 101)]
ViPhOG00232	101	101		[('Caliciviridae', 101)]

## Sheet: Table S3
Table S3. Top 10 classification errors per taxonomic level. List of the 10 most common classification mistakes per taxonomic level.
Level = Taxonomic level
Real Taxa = Taxonomic lineage of the misclassified genomes
Predicted taxa = Taxa predicted by the Random Forest classifier
Genomes available = Number of genomes with the specified taxonomic assignment in the non-redundant viral diversity.
Genomes used = Number of genomes with the specified designation assigntation used in a training/testing iteration of the Random Forest classifier
Missclassification = Percentage of cases where a genome was erronusly classified as the predicted taxa after all Random Forest iterations.
Level	Real Taxa	Genomes available	Genomes used (per iteration)	Predicted taxa	Genomes available	Genomes used (per iteration)	Misclassification (%)
Order	Ligamenvirales	14	8	Picornavirales	952	251	1.62857
Order	Ligamenvirales	14	8	Caudovirales	2047	251	1.42857
Order	Herpesvirales	349	132	Caudovirales	2047	251	1.26286
Order	Caudovirales	2047	251	Picornavirales	952	251	0.758964
Order	Picornavirales	952	251	Caudovirales	2047	251	0.44502
Order	Herpesvirales	349	132	Picornavirales	952	251	0.426286
Order	Nidovirales	513	251	Picornavirales	952	251	0.235857
Order	Nidovirales	513	251	Tymovirales	320	126	0.182869
Order	Nidovirales	513	251	Caudovirales	2047	251	0.157769
Order	Caudovirales	2047	251	Herpesvirales	349	132	0.0326693
Family	nan_:_Amalgaviridae	3	2	nan_:_Endornaviridae	18	7	24.2941
Family	Herpesvirales_:_Alloherpesviridae	10	5	Tymovirales_:_Betaflexiviridae	178	18	15.5
Family	nan_:_Alphatetraviridae	3	2	nan_:_Endornaviridae	18	7	14.5
Family	nan_:_Alphatetraviridae	3	2	nan_:_Narnaviridae	15	7	12
Family	nan_:_Narnaviridae	15	7	nan_:_Alphatetraviridae	3	2	11.8889
Family	nan_:_Reoviridae	98	18	Caudovirales_:_Podoviridae	368	18	11.0556
Family	nan_:_Hepadnaviridae	436	18	nan_:_Polydnaviridae	42	18	10.25
Family	nan_:_Caulimoviridae	123	18	Caudovirales_:_Myoviridae	580	18	10.2222
Family	nan_:_Polyomaviridae	154	18	nan_:_Endornaviridae	18	7	9.5
Family	nan_:_Tectiviridae	11	6	nan_:_Endornaviridae	18	7	9.44444
Genus	nan_:_Papillomaviridae_:_Mupapillomavirus	2	2	nan_:_Totiviridae_:_Giardiavirus	2	1	100
Genus	Mononegavirales_:_Rhabdoviridae_:_Vesiculovirus	20	3	Mononegavirales_:_Rhabdoviridae_:_Sprivivirus	6	1	90
Genus	nan_:_Poxviridae_:_Yatapoxvirus	3	2	nan_:_Arenaviridae_:_Mammarenavirus	19	3	65.3333
Genus	nan_:_Papillomaviridae_:_Kappapapillomavirus	3	2	Herpesvirales_:_Alloherpesviridae_:_Cyprinivirus	7	3	54
Genus	Caudovirales_:_Podoviridae_:_Luz24likevirus	6	3	Herpesvirales_:_Alloherpesviridae_:_Cyprinivirus	7	3	54
Genus	nan_:_Inoviridae_:_Inovirus	25	3	Nidovirales_:_Coronaviridae_:_Bafinivirus	2	2	52.3333
Genus	Picornavirales_:_Secoviridae_:_Waikavirus	6	2	Tymovirales_:_Alphaflexiviridae_:_Allexivirus	15	3	42.6667
Genus	nan_:_Reoviridae_:_Orthoreovirus	44	3	Picornavirales_:_Picornaviridae_:_Cardiovirus	23	3	40
Genus	Caudovirales_:_Siphoviridae_:_Tm4likevirus	8	3	Herpesvirales_:_Alloherpesviridae_:_Cyprinivirus	7	3	38.6667
Genus	nan_:_Bromoviridae_:_Bromovirus	3	1	nan_:_Bromoviridae_:_Anulavirus	3	2	37.5

## Sheet: Table S4
Table S4. Informative ViPhOGs description. List of the 1,457 ViPhOGs selected as informative. The level at which the ViPhOG is informative and the associated taxon name are described. Functional descriptions of the regions comprising the ViPhOG are presented when available. Note that if a given ViPhOG is considered informative at more than one taxonomic level it may appear multiple times in the t…
Level = Taxonomic level at which the ViPhOG is associated as informative.
Label = The associated taxa of the inidcated level at which the ViPhOG is associated as informative.
Description = Funtional description of the regions that comprise the ViPhOG when available
ViPhOG ID	Level	Label	Description
ViPhOG331	Order	Mononegavirales
ViPhOG232	Order	Picornavirales
ViPhOG279	Order	Tymovirales
ViPhOG216	Order	Tymovirales
ViPhOG333	Order	Picornavirales
ViPhOG106	Order	Caudovirales
ViPhOG3590	Order
ViPhOG284	Order	Tymovirales
ViPhOG240	Order
ViPhOG1192	Order	Caudovirales
ViPhOG446	Order	Nidovirales
ViPhOG3601	Order	Ligamenvirales
ViPhOG589	Order	Caudovirales
ViPhOG3609	Order	Ligamenvirales
ViPhOG451	Order	Nidovirales
ViPhOG112	Order	Herpesvirales
ViPhOG385	Order	Mononegavirales
ViPhOG582	Order	Caudovirales
ViPhOG134	Order	Herpesvirales
ViPhOG301	Order	Picornavirales
ViPhOG27127	Family	Birnaviridae	--Birnavirus VP2 protein----
ViPhOG27133	Family	Ophioviridae	vFam_4337_9_313-vFam_1346_64_124 | vFam_4337_1_336-vFam_3510_228_317
ViPhOG729	Family	Totiviridae
ViPhOG730	Family
ViPhOG229	Family
ViPhOG481	Family	Circoviridae
ViPhOG215	Family
ViPhOG3629	Family
ViPhOG231	Family
ViPhOG146	Family
ViPhOG239	Family
ViPhOG421	Family	Luteoviridae
ViPhOG27226	Family	Fusarividae
ViPhOG1386	Family	Hypoviridae
ViPhOG25606	Family		--Peptidase family A21------
ViPhOG482	Family	Circoviridae
ViPhOG422	Family	Luteoviridae
ViPhOG177	Family	Anelloviridae
ViPhOG431	Family	Tombusviridae
ViPhOG230	Family
ViPhOG8852	Family	Microviridae
ViPhOG234	Family
ViPhOG330	Family
ViPhOG25481	Family	Nodaviridae	--RNA dependent RNA polymerase---RdRp of positive ssRNA viruses catalytic domain profile.-- | Viral RNA dependent RNA polymerase-----RdRp of positive ssRNA viruses catalytic domain profile.-- | - | --RNA dependent RNA polymerase-RdRp of positive ssRNA viruses catalytic domain profile. | --RNA dependent RNA polymerase---- | ----RNA dependent RNA polymerase--
ViPhOG427	Family	Tombusviridae
ViPhOG1251	Family	Leviviridae
ViPhOG1677	Family
ViPhOG300	Family	Picornaviridae
ViPhOG3585	Family
ViPhOG225	Family	Polyomaviridae
ViPhOG3600	Family
ViPhOG307	Family
ViPhOG1248	Family	Leviviridae
ViPhOG384	Family	Paramyxoviridae
ViPhOG332	Family	Picornaviridae
ViPhOG269	Family	Geminiviridae
ViPhOG329	Family	Rhabdoviridae
ViPhOG278	Family
ViPhOG376	Family
ViPhOG767	Family
ViPhOG210	Family
ViPhOG486	Family	Astroviridae
ViPhOG26728	Family	Arenaviridae	--Arenavirus nucleocapsid protein---- | --Arenavirus nucleocapsid protein-Trp-Asp (WD) repeats profile. | Arenavirus nucleocapsid protein-- | --Arenavirus nucleocapsid protein | --Arenavirus nucleocapsid protein-- | Arenavirus nucleocapsid protein | --Arenavirus nucleocapsid protein------
ViPhOG223	Family	Polyomaviridae
ViPhOG226	Family
ViPhOG1003	Family	Iflaviridae
ViPhOG857	Family
ViPhOG768	Family
ViPhOG283	Family
ViPhOG766	Family
ViPhOG26729	Family	Arenaviridae	Arenavirus RNA polymerase---RdRp of negative ssRNA viruses with segmented genomes catalytic domain profile. | Arenavirus RNA polymerase---capSnatchArena: RNA endonuclease, cap-snatching-RdRp of negative ssRNA viruses with segmented genomes catalytic domain profile. | --Arenavirus RNA polymerase-capSnatchArena: RNA endonuclease, cap-snatching---RdRp of negative ssRNA viruses with segmented genomes…
ViPhOG720	Family	Parvoviridae
ViPhOG24369	Family		NONSTRUCTURAL NS3 ORF2 ORF4
ViPhOG24368	Family		vFam_2043_0_56 | vFam_2043_0_66
ViPhOG765	Family
ViPhOG723	Family	Parvoviridae
ViPhOG277	Family	Alphaflexiviridae
ViPhOG216	Family	Luteoviridae
ViPhOG302	Family	Hepeviridae
ViPhOG220	Family	Luteoviridae
ViPhOG250	Family
ViPhOG206	Family	Hepadnaviridae
ViPhOG751	Family
ViPhOG320	Family
ViPhOG205	Family	Hepadnaviridae
ViPhOG232	Family	Caliciviridae
ViPhOG700	Family	Flaviviridae
ViPhOG189	Family	Papillomaviridae
ViPhOG326	Family	Rhabdoviridae
ViPhOG16251	Family		vFam_571_2_155 | vFam_571_0_160-vFam_1618_131_157 | vFam_571_1_159 | vFam_571_37_157 | vFam_571_8_157 | vFam_571_0_164 | vFam_571_0_160 | vFam_571_3_160 | vFam_571_46_160
ViPhOG377	Family	Virgaviridae
ViPhOG219	Family	Luteoviridae
ViPhOG25986	Family	Nodaviridae	--PROTEASE COAT GAMMA ALPHA ENDOPEPTIDASE CONTAINS: CAPSID STRUCTURAL HYDROLASE BETA---Peptidase A6 family-Nodavirus coat precursor endopeptidase (A6) aspartic protease signature-Nodavirus coat precursor endopeptidase (A6) aspartic protease signature-Nodavirus coat precursor endopeptidase (A6) aspartic protease signature-Nodavirus coat precursor endopeptidase (A6) aspartic protease signature-Noda…
ViPhOG304	Family	Hepeviridae
ViPhOG188	Family	Papillomaviridae
ViPhOG434	Family	Betaflexiviridae
ViPhOG105	Family
ViPhOG12699	Family	Microviridae
ViPhOG209	Family	Hepadnaviridae
ViPhOG26727	Family	Arenaviridae	Arenavirus glycoprotein---Arenavirus glycoprotein | Arenavirus glycoprotein-- | Arenavirus glycoprotein
ViPhOG184	Family	Papillomaviridae
ViPhOG273	Family	Geminiviridae
ViPhOG11734	Family	Totiviridae	Totivirus coat protein
ViPhOG272	Family	Geminiviridae
ViPhOG208	Family	Hepadnaviridae
ViPhOG372	Family	Virgaviridae
ViPhOG176	Family	Anelloviridae
ViPhOG28136	Family	Nyamiviridae
ViPhOG370	Family	Virgaviridae
ViPhOG6432	Family	Filoviridae
ViPhOG28683	Family	Secoviridae	----Nepovirus coat protein, N-terminal domain-Nepovirus coat protein, central domain-- | ----Nepovirus coat protein, N-terminal domain---Nepovirus coat protein, central domain
ViPhOG28134	Family	Nyamiviridae	-
ViPhOG371	Family	Virgaviridae
ViPhOG279	Family	Alphaflexiviridae
ViPhOG28138	Family	Nyamiviridae	Mononegavirales mRNA-capping region V-paramyx_RNAcap: mRNA capping enzyme
ViPhOG28135	Family	Nyamiviridae	vFam_4416_168_425-vFam_1015_489_618-vFam_53_407_504-vFam_49_578_690 | vFam_4416_155_425 | vFam_4416_156_241-vFam_4416_265_425-vFam_1416_523_591-vFam_3057_145_190
ViPhOG27242	Family	Partitiviridae
ViPhOG182	Family	Papillomaviridae
ViPhOG27138	Family	Bicaudaviridae	--- | ----Phage integrase family | -
ViPhOG6425	Family	Filoviridae
ViPhOG6426	Family	Filoviridae
ViPhOG3342	Family	Bornaviridae
ViPhOG6427	Family	Filoviridae
ViPhOG3336	Family	Bornaviridae
ViPhOG11736	Family	Totiviridae	vFam_176_654_840 | vFam_176_625_839-vFam_6077_46_77 | vFam_176_635_839 | vFam_176_610_839 | vFam_176_624_840 | vFam_176_636_839 | vFam_176_601_839 | vFam_176_657_840 | vFam_176_639_840 | vFam_176_621_840 | vFam_176_619_840 | vFam_176_611_839 | vFam_176_638_839 | vFam_176_647_840-vFam_5420_38_70 | vFam_176_647_839 | vFam_176_636_840 | vFam_176_635_840-vFam_3535_56_119 | vFam_176_643_839 | vFam_176…
ViPhOG27136	Family	Bicaudaviridae
ViPhOG293	Family
ViPhOG25480	Family	Nodaviridae	vFam_20_1_362 | vFam_20_0_466 | vFam_20_1_454 | vFam_20_2_467 | vFam_20_27_355-vFam_4215_28_78 | vFam_20_27_362
ViPhOG406	Family	Tymoviridae
ViPhOG28137	Family	Nyamiviridae	vFam_42_14_159 | vFam_42_16_200 | vFam_42_20_158
ViPhOG445	Family
ViPhOG305	Family	Hepeviridae
ViPhOG27162	Family	Polydnaviridae	----ankyrin repeats-Ankyrin repeat region circular profile.-ankyrin repeats-ankyrin repeats-Ankyrin repeat | ----ankyrin repeats-Ankyrin repeat region circular profile.-Ankyrin repeats (many copies)-ankyrin repeats-ankyrin repeats | ----Ankyrin repeat-ankyrin repeats-Ankyrin repeat profile.-Ankyrin repeat region circular profile.-ankyrin repeats | --ankyrin repeats-Ankyrin repeat region circular …
ViPhOG407	Family	Tymoviridae
ViPhOG28133	Family	Nyamiviridae	vFam_5856_0_231 | vFam_5856_18_228
ViPhOG1156	Family	Caulimoviridae
ViPhOG3338	Family	Bornaviridae
ViPhOG10204	Family	Roniviridae
ViPhOG405	Family	Tymoviridae
ViPhOG409	Family	Tymoviridae
ViPhOG403	Family	Tymoviridae
ViPhOG3340	Family	Bornaviridae
ViPhOG2941	Family
ViPhOG404	Family	Tymoviridae
ViPhOG2933	Family	Baculoviridae
ViPhOG3339	Family	Bornaviridae
ViPhOG280	Family
ViPhOG2949	Family	Baculoviridae
ViPhOG180	Family	Papillomaviridae
ViPhOG27137	Family	Bicaudaviridae
ViPhOG3374	Family	Tectiviridae
ViPhOG11738	Family		--- | ----- | - | ----ATPase family associated with various cellular activities (AAA)
ViPhOG6431	Family	Filoviridae
ViPhOG10207	Family	Roniviridae
ViPhOG8408	Family
ViPhOG6428	Family	Filoviridae
ViPhOG10203	Family	Roniviridae
ViPhOG26800	Family	Bunyaviridae	Tenuivirus/Phlebovirus nucleocapsid protein
ViPhOG27152	Family	Polydnaviridae	----Protein tyrosine phosphatase, catalytic domain-PTP type protein phosphatase family profile.-Protein-tyrosine phosphatase-Protein tyrosine phosphatase signature-Protein tyrosine phosphatase signature-Protein tyrosine phosphatase, catalytic domain motif-Tyrosine specific protein phosphatases family profile.-Protein tyrosine phosphatase signature-Protein tyrosine phosphatase signature-Protein ty…
ViPhOG322	Family	Potyviridae
ViPhOG181	Family	Papillomaviridae
ViPhOG10205	Family	Roniviridae
ViPhOG11435	Family		--- | ----Polysaccharide lyase family 8, N terminal alpha-helical domain | --Polysaccharide lyase family 8, N terminal alpha-helical domain--
ViPhOG485	Family	Astroviridae
ViPhOG956	Family	Mesoniviridae
ViPhOG10206	Family	Roniviridae	Gill-associated viral 3C-like peptidase
ViPhOG5921	Family
ViPhOG432	Family	Betaflexiviridae
ViPhOG306	Family	Hepeviridae
ViPhOG20691	Family	Endornaviridae
ViPhOG13253	Family	Totiviridae	vFam_3909_0_698 | vFam_3909_0_699 | vFam_3909_0_699-vFam_4354_330_384 | vFam_3909_0_695 | vFam_3909_49_693 | vFam_3909_20_693 | vFam_3909_25_693
ViPhOG27976	Family	Secoviridae	--Large coat protein---- | Large coat protein------
ViPhOG27135	Family	Bicaudaviridae
ViPhOG891	Family
ViPhOG178	Family	Anelloviridae
ViPhOG10208	Family	Roniviridae
ViPhOG27141	Family	Partitiviridae
ViPhOG27154	Family	Polydnaviridae
ViPhOG4230	Family	Alloherpesviridae
ViPhOG953	Family
ViPhOG484	Family	Circoviridae
ViPhOG324	Family	Potyviridae
ViPhOG26326	Family	Bunyaviridae	--Hantavirus glycoprotein G1-Immunoreceptor tyrosine-based activation motif-ITAM motif hantavirus type profile.-GLYCOPROTEIN POLYPROTEIN ENVELOPE G2 G1 PRECURSOR SIGNAL M TRANSMEMBRANE MEMBRANE-Hantavirus glycoprotein G2 | --Hantavirus glycoprotein G1---Immunoreceptor tyrosine-based activation motif-ITAM motif hantavirus type profile.-GLYCOPROTEIN POLYPROTEIN ENVELOPE G2 G1 PRECURSOR SIGNAL M TRA…
ViPhOG1001	Family	Iflaviridae
ViPhOG26002	Family	Partitiviridae
ViPhOG1351	Family	Togaviridae
ViPhOG760	Family	Inoviridae
ViPhOG960	Family	Mesoniviridae
ViPhOG488	Family	Astroviridae
ViPhOG399	Family
ViPhOG26327	Family	Bunyaviridae	--capSnatchArena: RNA endonuclease, cap-snatching-RNA dependent RNA polymerase-Bunyavirus RNA dependent RNA polymerase-RdRp of negative ssRNA viruses with segmented genomes catalytic domain profile.
ViPhOG1250	Family	Leviviridae
ViPhOG3341	Family	Bornaviridae
ViPhOG6110	Family
ViPhOG28352	Family	Bunyaviridae	--Phlebovirus nonstructural protein NS-M-----Phlebovirus glycoprotein G1-Phlebovirus glycoprotein G2 | Phlebovirus nonstructural protein NS-M---Phlebovirus nonstructural protein NS-M-Phlebovirus glycoprotein G1-Phlebovirus glycoprotein G2 | Phlebovirus nonstructural protein NS-M---------Phlebovirus glycoprotein G1-Phlebovirus glycoprotein G2
ViPhOG386	Family	Paramyxoviridae
ViPhOG7324	Family
ViPhOG25438	Family	Hypoviridae
ViPhOG25435	Family	Hypoviridae
ViPhOG1347	Family	Togaviridae
ViPhOG413	Family	Picornaviridae
ViPhOG1352	Family	Togaviridae
ViPhOG4289	Family	Alloherpesviridae
ViPhOG1382	Family	Hypoviridae
ViPhOG24633	Family	Bromoviridae	vFam_275_424_750-vFam_6312_52_94 | vFam_275_427_750 | vFam_275_435_750 | vFam_275_428_750 | vFam_275_458_747 | vFam_275_422_747 | vFam_275_425_750 | vFam_275_422_748 | vFam_275_425_747
ViPhOG1385	Family	Hypoviridae
ViPhOG317	Family	Potyviridae
ViPhOG378	Family	Paramyxoviridae
ViPhOG2962	Family	Nudiviridae
ViPhOG224	Family	Polyomaviridae
ViPhOG1350	Family	Togaviridae
ViPhOG26350	Family	Bunyaviridae	NUCLEOPROTEIN VIRAL NUCLEOCAPSID N RNA-BINDING STRUCTURAL RNA TWO FOR OVERLAPPING---Bunyavirus nucleocapsid (N) protein | NUCLEOPROTEIN VIRAL NUCLEOCAPSID N RNA-BINDING STRUCTURAL RNA TWO FOR OVERLAPPING-Bunyavirus nucleocapsid (N) protein | --NUCLEOPROTEIN VIRAL NUCLEOCAPSID N RNA-BINDING STRUCTURAL RNA TWO FOR OVERLAPPING-Bunyavirus nucleocapsid (N) protein
ViPhOG2960	Family	Baculoviridae
ViPhOG25436	Family	Hypoviridae
ViPhOG26324	Family	Bromoviridae	Bromovirus movement protein
ViPhOG383	Family	Paramyxoviridae
ViPhOG1349	Family	Togaviridae
ViPhOG18707	Family	Totiviridae	--L-A virus, major coat protein | L-A virus, major coat protein--
ViPhOG25437	Family	Hypoviridae	---
ViPhOG318	Family	Potyviridae
ViPhOG1345	Family	Togaviridae
ViPhOG3589	Family
ViPhOG952	Family	Mesoniviridae
ViPhOG1344	Family	Togaviridae
ViPhOG314	Family	Potyviridae
ViPhOG1191	Family
ViPhOG2952	Family	Nudiviridae
ViPhOG26344	Family		vFam_571_17_160 | vFam_571_21_180 | vFam_571_0_164 | vFam_571_9_152
ViPhOG26091	Family	Lipothrixviridae
ViPhOG27451	Family	Polydnaviridae	Pannexin family profile.-Innexin-Innexin signature-Innexin signature-Innexin signature-Innexin signature-Innexin signature-Innexin signature
ViPhOG3615	Family	Rudiviridae
ViPhOG25482	Family	Nodaviridae	B2-RNA binding protein B2-- | RNA binding protein B2-- | RNA binding protein B2-B2--
ViPhOG416	Family	Picornaviridae
ViPhOG274	Family	Geminiviridae
ViPhOG2956	Family	Nudiviridae
ViPhOG2944	Family
ViPhOG436	Family
ViPhOG313	Family
ViPhOG27157	Family	Polydnaviridae	BEN domain profile.-BEN domain-- | BEN domain profile.-BEN domain
ViPhOG1346	Family	Togaviridae
ViPhOG588	Family
ViPhOG937	Family
ViPhOG315	Family	Potyviridae
ViPhOG9933	Family	Closteroviridae
ViPhOG323	Family	Potyviridae
ViPhOG1343	Family	Togaviridae
ViPhOG2948	Family	Nudiviridae
ViPhOG25451	Family	Fuselloviridae	Protein of unknown function (DUF1035)
ViPhOG10190	Family	Bunyaviridae	--3A/RNA2 movement protein family---- | --3A/RNA2 movement protein family--
ViPhOG466	Family	Coronaviridae
ViPhOG2934	Family	Baculoviridae
ViPhOG4281	Family	Alloherpesviridae
ViPhOG2932	Family	Nudiviridae
ViPhOG428	Family	Tombusviridae
ViPhOG3588	Family	Rudiviridae
ViPhOG581	Family
ViPhOG955	Family	Mesoniviridae
ViPhOG271	Family	Geminiviridae
ViPhOG303	Family	Hepeviridae
ViPhOG731	Family
ViPhOG954	Family	Mesoniviridae
ViPhOG11739	Family	Fuselloviridae	Archaeal phage integrase | --Archaeal phage integrase-- | --Archaeal phage integrase
ViPhOG25466	Family	Fuselloviridae	ORF A83 B83 A-82
ViPhOG3601	Family	Rudiviridae
ViPhOG27163	Family	Polydnaviridae
ViPhOG25463	Family	Fuselloviridae	ORF B-166 B170 B169
ViPhOG415	Family	Picornaviridae
ViPhOG3346	Family	Closteroviridae
ViPhOG1367	Family	Caulimoviridae
ViPhOG3608	Family
ViPhOG28351	Family	Bunyaviridae	--Rift valley fever virus non structural protein (NSs) like-NONSTRUCTURAL NS-S NON-STRUCTURAL TRANSCRIPTION | Rift valley fever virus non structural protein (NSs) like-NONSTRUCTURAL NS-S NON-STRUCTURAL TRANSCRIPTION
ViPhOG414	Family	Picornaviridae
ViPhOG316	Family	Potyviridae
ViPhOG270	Family	Geminiviridae
ViPhOG167	Family	Retroviridae
ViPhOG25469	Family	Fuselloviridae	--ORF A-154 C154 C157 OFR | ORF A-154 C154 C157 OFR | ORF A-154 C154 C157 OFR-- | ORF A-154 C154 C157 OFR---Myc leucine zipper domain
ViPhOG1342	Family	Togaviridae
ViPhOG3598	Family	Rudiviridae
ViPhOG168	Family	Retroviridae
ViPhOG252	Family	Closteroviridae
ViPhOG328	Family	Rhabdoviridae
ViPhOG169	Family	Retroviridae
ViPhOG417	Family	Picornaviridae
ViPhOG451	Family	Coronaviridae
ViPhOG461	Family	Coronaviridae
ViPhOG163	Family	Retroviridae
ViPhOG72	Family
ViPhOG26341	Family	Partitiviridae	vFam_733_605_706 | vFam_733_603_706 | vFam_733_602_706 | vFam_733_611_705 | vFam_733_612_704 | vFam_733_617_705
ViPhOG462	Family	Coronaviridae
ViPhOG3337	Family	Bornaviridae
ViPhOG1017	Family	Arteriviridae
ViPhOG2939	Family	Baculoviridae
ViPhOG3595	Family	Rudiviridae
ViPhOG13255	Family	Totiviridae
ViPhOG170	Family	Retroviridae
ViPhOG1010	Family	Arteriviridae
ViPhOG325	Family	Potyviridae
ViPhOG27348	Family	Reoviridae	SIGMA CORE MAJOR A CAPSID INNER VP6 3D-STRUCTURE OUTER STRUCTURAL-Reoviral Sigma1/Sigma2 family | Reoviral Sigma1/Sigma2 family-SIGMA CORE MAJOR A CAPSID INNER VP6 3D-STRUCTURE OUTER STRUCTURAL
ViPhOG233	Family	Caliciviridae
ViPhOG327	Family	Rhabdoviridae
ViPhOG25468	Family	Fuselloviridae	ORF C279 C277 B-277---- | ORF C279 C277 B-277--
ViPhOG26340	Family	Partitiviridae	vFam_733_0_116 | vFam_733_0_142 | vFam_733_0_171 | vFam_733_0_140 | vFam_733_0_151 | vFam_733_2_140 | vFam_733_0_137
ViPhOG175	Family	Retroviridae
ViPhOG478	Family	Coronaviridae
ViPhOG1992	Family	Siphoviridae
ViPhOG1384	Family	Hypoviridae
ViPhOG3587	Family	Rudiviridae
ViPhOG464	Family	Coronaviridae
ViPhOG644	Family	Adenoviridae
ViPhOG1249	Family	Leviviridae
ViPhOG980	Family
ViPhOG2959	Family	Baculoviridae
ViPhOG435	Family	Betaflexiviridae
ViPhOG21811	Family	Alloherpesviridae	Helicase
ViPhOG460	Family	Coronaviridae
ViPhOG171	Family	Retroviridae
ViPhOG20692	Family	Endornaviridae
ViPhOG1013	Family	Arteriviridae
ViPhOG172	Family	Retroviridae
ViPhOG166	Family	Retroviridae
ViPhOG24632	Family	Bromoviridae	vFam_275_10_58 | vFam_275_11_59 | vFam_275_6_59 | vFam_275_0_58 | vFam_275_8_56 | vFam_275_5_59
ViPhOG27346	Family	Reoviridae	--Reovirus RNA-dependent RNA polymerase lambda 3-RdRp of Reoviridae dsRNA viruses catalytic domain profile. | Reovirus RNA-dependent RNA polymerase lambda 3---RdRp of Reoviridae dsRNA viruses catalytic domain profile.-- | Reovirus RNA-dependent RNA polymerase lambda 3---RdRp of Reoviridae dsRNA viruses catalytic domain profile.
ViPhOG1032	Family	Arteriviridae
ViPhOG3599	Family	Rudiviridae
ViPhOG26997	Family	Secoviridae	--- | vFam_3077_10_202-vFam_960_29_200-vFam_1427_34_91-vFam_1427_142_176 | vFam_3077_22_203-vFam_960_27_200 | ----3C cysteine protease (picornain 3C) | vFam_960_23_202-vFam_3077_35_203-vFam_1427_117_173
ViPhOG3594	Family	Rudiviridae
ViPhOG465	Family	Coronaviridae
ViPhOG27345	Family	Reoviridae	Reovirus core-spike protein lambda-2 (L2)-TRANSFERASE GUANYLYLTRANSFERASE NUCLEOTIDYLTRANSFERASE CORE-SPIKE LAMBDA-2 MRNA CAPPING VP1 ENZYME 3D-STRUCTURE---- | TRANSFERASE GUANYLYLTRANSFERASE NUCLEOTIDYLTRANSFERASE CORE-SPIKE LAMBDA-2 MRNA CAPPING VP1 ENZYME 3D-STRUCTURE-Reovirus core-spike protein lambda-2 (L2)-------- | TRANSFERASE GUANYLYLTRANSFERASE NUCLEOTIDYLTRANSFERASE CORE-SPIKE LAMBDA-2 …
ViPhOG25452	Family	Fuselloviridae	ORF D-335-like protein
ViPhOG2993	Family	Dicistroviridae
ViPhOG2511	Family
ViPhOG443	Family	Coronaviridae
ViPhOG27452	Family	Bromoviridae	Ilarvirus coat protein | --Ilarvirus coat protein
ViPhOG3581	Family
ViPhOG161	Family	Retroviridae
ViPhOG27349	Family	Reoviridae	Reovirus major virion structural protein Mu-1/Mu-1C (M2)---------- | Reovirus major virion structural protein Mu-1/Mu-1C (M2)--------
ViPhOG962	Family	Mesoniviridae
ViPhOG1033	Family	Arteriviridae
ViPhOG25987	Family	Leviviridae	RNA replicase, beta-chain-RdRp of RNA-containing bacteriophages catalytic domain profile. | RNA replicase, beta-chain-RdRp of RNA-containing bacteriophages catalytic domain profile.-- | --RNA replicase, beta-chain-RdRp of RNA-containing bacteriophages catalytic domain profile.
ViPhOG1012	Family	Arteriviridae
ViPhOG27292	Family	Sphaerolipoviridae
ViPhOG1031	Family	Arteriviridae
ViPhOG27909	Family	Reoviridae	vFam_1416_2_550 | vFam_1416_0_543
ViPhOG472	Family	Coronaviridae
ViPhOG981	Family
ViPhOG1163	Family	Luteoviridae
ViPhOG463	Family	Coronaviridae
ViPhOG196	Family	Flaviviridae
ViPhOG437	Family	Betaflexiviridae
ViPhOG446	Family	Coronaviridae
ViPhOG2963	Family	Nudiviridae
ViPhOG1952	Family	Leviviridae
ViPhOG6081	Family	Myoviridae
ViPhOG3582	Family	Rudiviridae
ViPhOG3607	Family	Rudiviridae
ViPhOG476	Family	Coronaviridae
ViPhOG26072	Family	Lipothrixviridae
ViPhOG963	Family	Mesoniviridae
ViPhOG1023	Family	Arteriviridae
ViPhOG961	Family	Mesoniviridae
ViPhOG281	Family
ViPhOG1546	Family
ViPhOG6429	Family	Filoviridae
ViPhOG3903	Family	Asfarviridae
ViPhOG319	Family	Potyviridae
ViPhOG1008	Family	Arteriviridae
ViPhOG26798	Family	Bunyaviridae	Phlebovirus glycoprotein G2
ViPhOG3579	Family	Rudiviridae
ViPhOG174	Family	Retroviridae
ViPhOG1022	Family	Arteriviridae
ViPhOG26992	Family	Fuselloviridae	helix_turn_helix, Arsenical Resistance Operon Repressor-Winged helix-turn-helix DNA-binding---- | ----Bacterial regulatory protein, arsR family | helix_turn_helix, Arsenical Resistance Operon Repressor---Bacterial regulatory protein, arsR family---- | ArsR-type HTH domain profile.-Winged helix-turn-helix DNA-binding---- | --helix_turn_helix, Arsenical Resistance Operon Repressor---Helix-turn-heli…
ViPhOG191	Family	Flaviviridae
ViPhOG10762	Family	Malacoherpesviridae
ViPhOG194	Family	Flaviviridae
ViPhOG193	Family	Flaviviridae
ViPhOG1015	Family	Arteriviridae
ViPhOG1469	Family	Caliciviridae
ViPhOG450	Family
ViPhOG162	Family	Retroviridae
ViPhOG2422	Family
ViPhOG202	Family	Flaviviridae
ViPhOG12271	Family		vFam_1262_0_147-vFam_2267_3_139-vFam_2436_27_128-vFam_2750_52_89
ViPhOG638	Family	Adenoviridae
ViPhOG964	Family	Mesoniviridae
ViPhOG26074	Family	Lipothrixviridae	vFam_1647_36_100-vFam_817_901_942
ViPhOG1953	Family	Leviviridae
ViPhOG26799	Family	Bunyaviridae	Phlebovirus glycoprotein G1-- | Phlebovirus glycoprotein G1
ViPhOG4594	Family	Myoviridae
ViPhOG447	Family	Coronaviridae
ViPhOG2447	Family
ViPhOG1184	Family
ViPhOG1377	Family	Hypoviridae
ViPhOG207	Family	Hepadnaviridae
ViPhOG649	Family	Adenoviridae
ViPhOG26071	Family	Lipothrixviridae
ViPhOG12700	Family	Microviridae	Chlamydia-phage Chp2 scaffold (Chlamy_scaf)-chlamy_scaf: scaffolding protein | Chlamydia-phage Chp2 scaffold (Chlamy_scaf) | Chlamydia-phage Chp2 scaffold (Chlamy_scaf)--
ViPhOG459	Family	Coronaviridae
ViPhOG12590	Family	Iflaviridae
ViPhOG2936	Family	Baculoviridae
ViPhOG950	Family	Mesoniviridae
ViPhOG2400	Family	Iridoviridae
ViPhOG26996	Family	Secoviridae	vFam_960_89_116-vFam_170_454_596 | vFam_170_323_591 | vFam_170_308_596 | vFam_170_310_595 | vFam_170_436_594 | vFam_170_299_590
ViPhOG1025	Family	Arteriviridae
ViPhOG2940	Family
ViPhOG201	Family	Flaviviridae
ViPhOG2479	Family	Iridoviridae
ViPhOG197	Family	Flaviviridae
ViPhOG6997	Family
ViPhOG231	Genus
ViPhOG215	Genus
ViPhOG211	Genus	Deltavirus
ViPhOG729	Genus
ViPhOG229	Genus
ViPhOG27133	Genus	Ophiovirus	vFam_4337_9_313-vFam_1346_64_124 | vFam_4337_1_336-vFam_3510_228_317
ViPhOG8408	Genus
ViPhOG27341	Genus	Rotavirus	Viral RNA-directed RNA-polymerase---RdRp of Reoviridae dsRNA viruses catalytic domain profile.---- | Viral RNA-directed RNA-polymerase---RdRp of Reoviridae dsRNA viruses catalytic domain profile.
ViPhOG431	Genus
ViPhOG700	Genus	Flavivirus
ViPhOG239	Genus
ViPhOG180	Genus
ViPhOG181	Genus
ViPhOG28160	Genus		Bunyavirus RNA dependent RNA polymerase-RdRp of negative ssRNA viruses with segmented genomes catalytic domain profile. | Bunyavirus RNA dependent RNA polymerase-----RdRp of negative ssRNA viruses with segmented genomes catalytic domain profile.
ViPhOG10190	Genus	Tospovirus	--3A/RNA2 movement protein family---- | --3A/RNA2 movement protein family--
ViPhOG9379	Genus	Hepandensovirus
ViPhOG332	Genus
ViPhOG146	Genus
ViPhOG3105	Genus
ViPhOG11391	Genus	Gammapapillomavirus	vFam_151_0_98
ViPhOG26350	Genus	Orthobunyavirus	NUCLEOPROTEIN VIRAL NUCLEOCAPSID N RNA-BINDING STRUCTURAL RNA TWO FOR OVERLAPPING---Bunyavirus nucleocapsid (N) protein | NUCLEOPROTEIN VIRAL NUCLEOCAPSID N RNA-BINDING STRUCTURAL RNA TWO FOR OVERLAPPING-Bunyavirus nucleocapsid (N) protein | --NUCLEOPROTEIN VIRAL NUCLEOCAPSID N RNA-BINDING STRUCTURAL RNA TWO FOR OVERLAPPING-Bunyavirus nucleocapsid (N) protein
ViPhOG300	Genus
ViPhOG27976	Genus		--Large coat protein---- | Large coat protein------
ViPhOG9833	Genus
ViPhOG234	Genus
ViPhOG481	Genus	Circovirus
ViPhOG2931	Genus
ViPhOG230	Genus
ViPhOG6429	Genus	Ebolavirus
ViPhOG1319	Genus	Tymovirus
ViPhOG730	Genus
ViPhOG413	Genus
ViPhOG187	Genus	Alphapapillomavirus
ViPhOG27451	Genus		Pannexin family profile.-Innexin-Innexin signature-Innexin signature-Innexin signature-Innexin signature-Innexin signature-Innexin signature
ViPhOG3629	Genus
ViPhOG10130	Genus	Chipapillomavirus
ViPhOG421	Genus
ViPhOG265	Genus	Alphatorquevirus
ViPhOG376	Genus
ViPhOG482	Genus	Circovirus
ViPhOG422	Genus
ViPhOG11734	Genus		Totivirus coat protein
ViPhOG17842	Genus	Turncurtovirus
ViPhOG27141	Genus	Alphapartitivirus
ViPhOG178	Genus
ViPhOG22084	Genus	Dyoxipapillomavirus
ViPhOG26326	Genus	Hantavirus	--Hantavirus glycoprotein G1-Immunoreceptor tyrosine-based activation motif-ITAM motif hantavirus type profile.-GLYCOPROTEIN POLYPROTEIN ENVELOPE G2 G1 PRECURSOR SIGNAL M TRANSMEMBRANE MEMBRANE-Hantavirus glycoprotein G2 | --Hantavirus glycoprotein G1---Immunoreceptor tyrosine-based activation motif-ITAM motif hantavirus type profile.-GLYCOPROTEIN POLYPROTEIN ENVELOPE G2 G1 PRECURSOR SIGNAL M TRA…
ViPhOG176	Genus
ViPhOG11736	Genus		vFam_176_654_840 | vFam_176_625_839-vFam_6077_46_77 | vFam_176_635_839 | vFam_176_610_839 | vFam_176_624_840 | vFam_176_636_839 | vFam_176_601_839 | vFam_176_657_840 | vFam_176_639_840 | vFam_176_621_840 | vFam_176_619_840 | vFam_176_611_839 | vFam_176_638_839 | vFam_176_647_840-vFam_5420_38_70 | vFam_176_647_839 | vFam_176_636_840 | vFam_176_635_840-vFam_3535_56_119 | vFam_176_643_839 | vFam_176…
ViPhOG22083	Genus	Dyoxipapillomavirus
ViPhOG18270	Genus		vFam_151_83_140
ViPhOG9755	Genus	Umbravirus
ViPhOG18707	Genus		--L-A virus, major coat protein | L-A virus, major coat protein--
ViPhOG13253	Genus	Trichomonasvirus	vFam_3909_0_698 | vFam_3909_0_699 | vFam_3909_0_699-vFam_4354_330_384 | vFam_3909_0_695 | vFam_3909_49_693 | vFam_3909_20_693 | vFam_3909_25_693
ViPhOG334	Genus
ViPhOG25606	Genus		--Peptidase family A21------
ViPhOG25986	Genus	Alphanodavirus	--PROTEASE COAT GAMMA ALPHA ENDOPEPTIDASE CONTAINS: CAPSID STRUCTURAL HYDROLASE BETA---Peptidase A6 family-Nodavirus coat precursor endopeptidase (A6) aspartic protease signature-Nodavirus coat precursor endopeptidase (A6) aspartic protease signature-Nodavirus coat precursor endopeptidase (A6) aspartic protease signature-Nodavirus coat precursor endopeptidase (A6) aspartic protease signature-Noda…
ViPhOG277	Genus	Potexvirus
ViPhOG232	Genus	Norovirus
ViPhOG436	Genus
ViPhOG266	Genus
ViPhOG11735	Genus		vFam_176_4_97 | vFam_176_2_112 | vFam_176_5_92 | vFam_176_4_103 | vFam_176_9_94 | vFam_176_5_91 | vFam_176_4_124 | vFam_176_2_119 | vFam_176_2_118 | vFam_176_3_125 | vFam_176_5_108
ViPhOG28683	Genus	Nepovirus	----Nepovirus coat protein, N-terminal domain-Nepovirus coat protein, central domain-- | ----Nepovirus coat protein, N-terminal domain---Nepovirus coat protein, central domain
ViPhOG8838	Genus
ViPhOG6066	Genus
ViPhOG26327	Genus	Hantavirus	--capSnatchArena: RNA endonuclease, cap-snatching-RNA dependent RNA polymerase-Bunyavirus RNA dependent RNA polymerase-RdRp of negative ssRNA viruses with segmented genomes catalytic domain profile.
ViPhOG177	Genus
ViPhOG27294	Genus
ViPhOG1005	Genus
ViPhOG6065	Genus
ViPhOG427	Genus
ViPhOG9766	Genus
ViPhOG2979	Genus
ViPhOG615	Genus
ViPhOG11261	Genus		Mononegavirales mRNA-capping region V-paramyx_RNAcap: mRNA capping enzyme-Virus-capping methyltransferase-Mononegavirus L protein 2prima-O-ribose methyltransferase domain profile. | Virus-capping methyltransferase-Mononegavirus L protein 2prima-O-ribose methyltransferase domain profile. | Mononegavirales mRNA-capping region V-paramyx_RNAcap: mRNA capping enzyme-Virus-capping methyltransferase-Mon…
ViPhOG16166	Genus	Dicipivirus
ViPhOG27242	Genus	Betapartitivirus
ViPhOG16338	Genus	Teschovirus	Protein of unknown function (DUF3637)
ViPhOG11260	Genus		Vesiculovirus matrix protein | --Vesiculovirus matrix protein
ViPhOG25481	Genus		--RNA dependent RNA polymerase---RdRp of positive ssRNA viruses catalytic domain profile.-- | Viral RNA dependent RNA polymerase-----RdRp of positive ssRNA viruses catalytic domain profile.-- | - | --RNA dependent RNA polymerase-RdRp of positive ssRNA viruses catalytic domain profile. | --RNA dependent RNA polymerase---- | ----RNA dependent RNA polymerase--
ViPhOG2978	Genus
ViPhOG145	Genus
ViPhOG26728	Genus		--Arenavirus nucleocapsid protein---- | --Arenavirus nucleocapsid protein-Trp-Asp (WD) repeats profile. | Arenavirus nucleocapsid protein-- | --Arenavirus nucleocapsid protein | --Arenavirus nucleocapsid protein-- | Arenavirus nucleocapsid protein | --Arenavirus nucleocapsid protein------
ViPhOG8837	Genus	Kobuvirus
ViPhOG16337	Genus	Teschovirus	vFam_52_31_88-vFam_326_10_85-vFam_3379_1_31 | vFam_52_30_108-vFam_326_6_85-vFam_3379_4_33 | vFam_52_28_120-vFam_326_10_85-vFam_3379_1_33
ViPhOG370	Genus	Tobamovirus
ViPhOG8852	Genus
ViPhOG380	Genus
ViPhOG723	Genus
ViPhOG917	Genus	Tepovirus
ViPhOG1251	Genus
ViPhOG720	Genus
ViPhOG26727	Genus		Arenavirus glycoprotein---Arenavirus glycoprotein | Arenavirus glycoprotein-- | Arenavirus glycoprotein
ViPhOG26002	Genus	Gammapartitivirus
ViPhOG330	Genus
ViPhOG326	Genus
ViPhOG3306	Genus	Furovirus
ViPhOG26729	Genus		Arenavirus RNA polymerase---RdRp of negative ssRNA viruses with segmented genomes catalytic domain profile. | Arenavirus RNA polymerase---capSnatchArena: RNA endonuclease, cap-snatching-RdRp of negative ssRNA viruses with segmented genomes catalytic domain profile. | --Arenavirus RNA polymerase-capSnatchArena: RNA endonuclease, cap-snatching---RdRp of negative ssRNA viruses with segmented genomes…
ViPhOG857	Genus
ViPhOG708	Genus
ViPhOG921	Genus
ViPhOG272	Genus
ViPhOG16167	Genus		--- | ----picornavirus capsid protein
ViPhOG329	Genus
ViPhOG12515	Genus	Teschovirus
ViPhOG327	Genus	Lyssavirus
ViPhOG3333	Genus
ViPhOG701	Genus
ViPhOG1306	Genus	Mastrevirus
ViPhOG189	Genus
ViPhOG328	Genus	Lyssavirus
ViPhOG25673	Genus	Chlamydiamicrovirus
ViPhOG3309	Genus	Aureusvirus
ViPhOG15584	Genus		vFam_2390_9_126 | vFam_2390_7_126
ViPhOG9767	Genus	Upsilonpapillomavirus
ViPhOG3335	Genus
ViPhOG8467	Genus	Lambdapapillomavirus
ViPhOG1386	Genus	Hypovirus
ViPhOG25574	Genus		vFam_176_0_93 | vFam_176_1_99 | vFam_176_0_95 | vFam_176_0_97 | vFam_176_37_90 | vFam_176_1_98 | vFam_176_1_94 | vFam_176_5_87
ViPhOG11268	Genus	Penstyldensovirus	Infectious hypodermal and haematopoietic necrosis virus, capsid
ViPhOG273	Genus
ViPhOG11267	Genus	Penstyldensovirus
ViPhOG269	Genus
ViPhOG434	Genus
ViPhOG26998	Genus	Bacillarnavirus	--CRPV capsid protein like-- | ----CRPV capsid protein like
ViPhOG1249	Genus	Allolevivirus
ViPhOG10177	Genus	Eragrovirus
ViPhOG12695	Genus	Tetraparvovirus
ViPhOG267	Genus
ViPhOG710	Genus	Morbillivirus
ViPhOG10176	Genus	Eragrovirus
ViPhOG11687	Genus	Marafivirus
ViPhOG23244	Genus	Tibrovirus
ViPhOG274	Genus
ViPhOG15583	Genus
ViPhOG9933	Genus
ViPhOG1318	Genus	Dependoparvovirus
ViPhOG1003	Genus
ViPhOG919	Genus	Tombusvirus
ViPhOG23243	Genus	Tibrovirus
ViPhOG12696	Genus
ViPhOG23245	Genus	Tibrovirus
ViPhOG281	Genus
ViPhOG27712	Genus	Bacillarnavirus	--- | --3C cysteine protease (picornain 3C)-- | 3C cysteine protease (picornain 3C)----
ViPhOG278	Genus
ViPhOG293	Genus
ViPhOG3346	Genus
ViPhOG3585	Genus
ViPhOG3600	Genus
ViPhOG1250	Genus	Allolevivirus
ViPhOG922	Genus	Tombusvirus
ViPhOG428	Genus	Carmovirus
ViPhOG518	Genus
ViPhOG6262	Genus	Epsilonretrovirus
ViPhOG283	Genus
ViPhOG307	Genus
ViPhOG279	Genus	Potexvirus
ViPhOG270	Genus
ViPhOG271	Genus
ViPhOG184	Genus
ViPhOG8840	Genus	Kobuvirus
ViPhOG12699	Genus	Pequenovirus
ViPhOG408	Genus	Maculavirus
ViPhOG11727	Genus
ViPhOG1215	Genus
ViPhOG703	Genus	Nucleorhabdovirus
ViPhOG210	Genus
ViPhOG335	Genus
ViPhOG8841	Genus	Kobuvirus
ViPhOG297	Genus
ViPhOG16149	Genus		C protein from hendra and measles viruses | C protein from hendra and measles viruses--
ViPhOG225	Genus	Polyomavirus
ViPhOG1248	Genus
ViPhOG333	Genus
ViPhOG8637	Genus	Betanecrovirus
ViPhOG295	Genus	Gammaretrovirus
ViPhOG417	Genus
ViPhOG252	Genus
ViPhOG1143	Genus	Respirovirus
ViPhOG1159	Genus
ViPhOG486	Genus
ViPhOG296	Genus
ViPhOG182	Genus
ViPhOG1317	Genus	Dependoparvovirus
ViPhOG15979	Genus
ViPhOG485	Genus	Mamastrovirus
ViPhOG188	Genus
ViPhOG382	Genus	Avulavirus
ViPhOG280	Genus
ViPhOG16150	Genus		N-terminal region of Paramyxovirinae phosphoprotein (P)
ViPhOG16501	Genus	Becurtovirus	--- | ----Geminivirus Rep catalytic domain | ----Geminivirus Rep catalytic domain-Geminivirus AL1 coat protein signature-Geminivirus AL1 coat protein signature
ViPhOG24369	Genus		NONSTRUCTURAL NS3 ORF2 ORF4
ViPhOG8635	Genus	Betanecrovirus
ViPhOG27345	Genus		Reovirus core-spike protein lambda-2 (L2)-TRANSFERASE GUANYLYLTRANSFERASE NUCLEOTIDYLTRANSFERASE CORE-SPIKE LAMBDA-2 MRNA CAPPING VP1 ENZYME 3D-STRUCTURE---- | TRANSFERASE GUANYLYLTRANSFERASE NUCLEOTIDYLTRANSFERASE CORE-SPIKE LAMBDA-2 MRNA CAPPING VP1 ENZYME 3D-STRUCTURE-Reovirus core-spike protein lambda-2 (L2)-------- | TRANSFERASE GUANYLYLTRANSFERASE NUCLEOTIDYLTRANSFERASE CORE-SPIKE LAMBDA-2 …
ViPhOG320	Genus
ViPhOG26001	Genus	Gammapartitivirus	vFam_1272_0_39-vFam_1392_96_120
ViPhOG298	Genus
ViPhOG28152	Genus	Cosavirus	vFam_3372_115_142-vFam_2218_0_119-vFam_2009_17_119-vFam_52_63_95 | vFam_2218_0_119-vFam_2009_24_123 | vFam_3372_120_142-vFam_2218_0_119-vFam_52_67_94-vFam_2009_25_120 | vFam_2218_0_119-vFam_2009_18_118-vFam_52_43_93
ViPhOG3626	Genus	Plectrovirus
ViPhOG9180	Genus
ViPhOG216	Genus
ViPhOG26800	Genus		#NAME?
ViPhOG384	Genus
ViPhOG16502	Genus	Becurtovirus
ViPhOG439	Genus	Carlavirus
ViPhOG25480	Genus		vFam_20_1_362 | vFam_20_0_466 | vFam_20_1_454 | vFam_20_2_467 | vFam_20_27_355-vFam_4215_28_78 | vFam_20_27_362
ViPhOG418	Genus
ViPhOG26997	Genus		--- | vFam_3077_10_202-vFam_960_29_200-vFam_1427_34_91-vFam_1427_142_176 | vFam_3077_22_203-vFam_960_27_200 | ----3C cysteine protease (picornain 3C) | vFam_960_23_202-vFam_3077_35_203-vFam_1427_117_173
ViPhOG11691	Genus	Iotatorquevirus	vFam_166_264_345
ViPhOG432	Genus
ViPhOG706	Genus	Avulavirus
ViPhOG13255	Genus	Trichomonasvirus
ViPhOG24368	Genus		vFam_2043_0_56 | vFam_2043_0_66
ViPhOG16248	Genus	Citrivirus	vFam_21_979_1072 | Peptidase family C23 domain profile.-Carlavirus endopeptidase
ViPhOG18770	Genus	Megrivirus
ViPhOG6430	Genus	Ebolavirus
ViPhOG17845	Genus
ViPhOG27432	Genus	Salterprovirus
ViPhOG27431	Genus	Salterprovirus	vFam_2210_33_565-vFam_2180_105_453-vFam_2180_408_512 | vFam_2210_33_430-vFam_2180_87_467-vFam_2210_462_496 | vFam_2210_33_565-vFam_2180_87_420-vFam_2180_396_511 | vFam_2210_41_558-vFam_2180_89_421-vFam_2180_412_493 | vFam_2210_35_430-vFam_2180_84_460-vFam_5357_46_64-vFam_5357_35_78-vFam_2210_463_496
ViPhOG290	Genus	Gammaretrovirus
ViPhOG27129	Genus		Orbivirus VP3 (T2) protein-- | --Orbivirus VP3 (T2) protein
ViPhOG8836	Genus	Kobuvirus
ViPhOG416	Genus
ViPhOG16249	Genus	Citrivirus	vFam_5160_1_51 | vFam_5160_0_46 | vFam_5160_0_49
ViPhOG11604	Genus	Iotatorquevirus	vFam_112_499_669 | vFam_112_499_663-vFam_4814_394_452 | vFam_112_512_675 | vFam_112_493_669 | vFam_112_517_675 | vFam_112_517_674 | vFam_112_507_674 | vFam_112_507_675 | vFam_112_505_663 | vFam_112_519_675 | vFam_112_522_674 | vFam_112_507_676 | vFam_112_520_675 | vFam_112_489_670 | vFam_112_521_673 | vFam_112_386_659 | vFam_112_520_667 | vFam_112_522_675 | vFam_112_497_669 | vFam_112_521_674
ViPhOG250	Genus
ViPhOG12386	Genus	Etatorquevirus
ViPhOG1142	Genus	Respirovirus
ViPhOG378	Genus
ViPhOG386	Genus
ViPhOG220	Genus
ViPhOG219	Genus
ViPhOG414	Genus
ViPhOG12387	Genus	Etatorquevirus
ViPhOG302	Genus	Hepevirus
ViPhOG17274	Genus	Panicovirus	Tombusvirus movement protein
ViPhOG17275	Genus	Panicovirus
ViPhOG20951	Genus	Megrivirus
ViPhOG11603	Genus	Iotatorquevirus
ViPhOG27128	Genus		--Orbivirus RNA-dependent RNA polymerase (VP1)---RdRp of Reoviridae dsRNA viruses catalytic domain profile.-- | Orbivirus RNA-dependent RNA polymerase (VP1)---RdRp of Reoviridae dsRNA viruses catalytic domain profile.-- | --Orbivirus RNA-dependent RNA polymerase (VP1)---RdRp of Reoviridae dsRNA viruses catalytic domain profile.----
[truncated: 1,152 more rows]
